# Supplementary material for: Isolation and Sequencing of Chromosome Arm 7RS of Rye, Secale cereale
Source: MDPI journal article supplement (doi:10.3390/ijms231911106), 2022-09-21
Supplement: s1 [file s1]

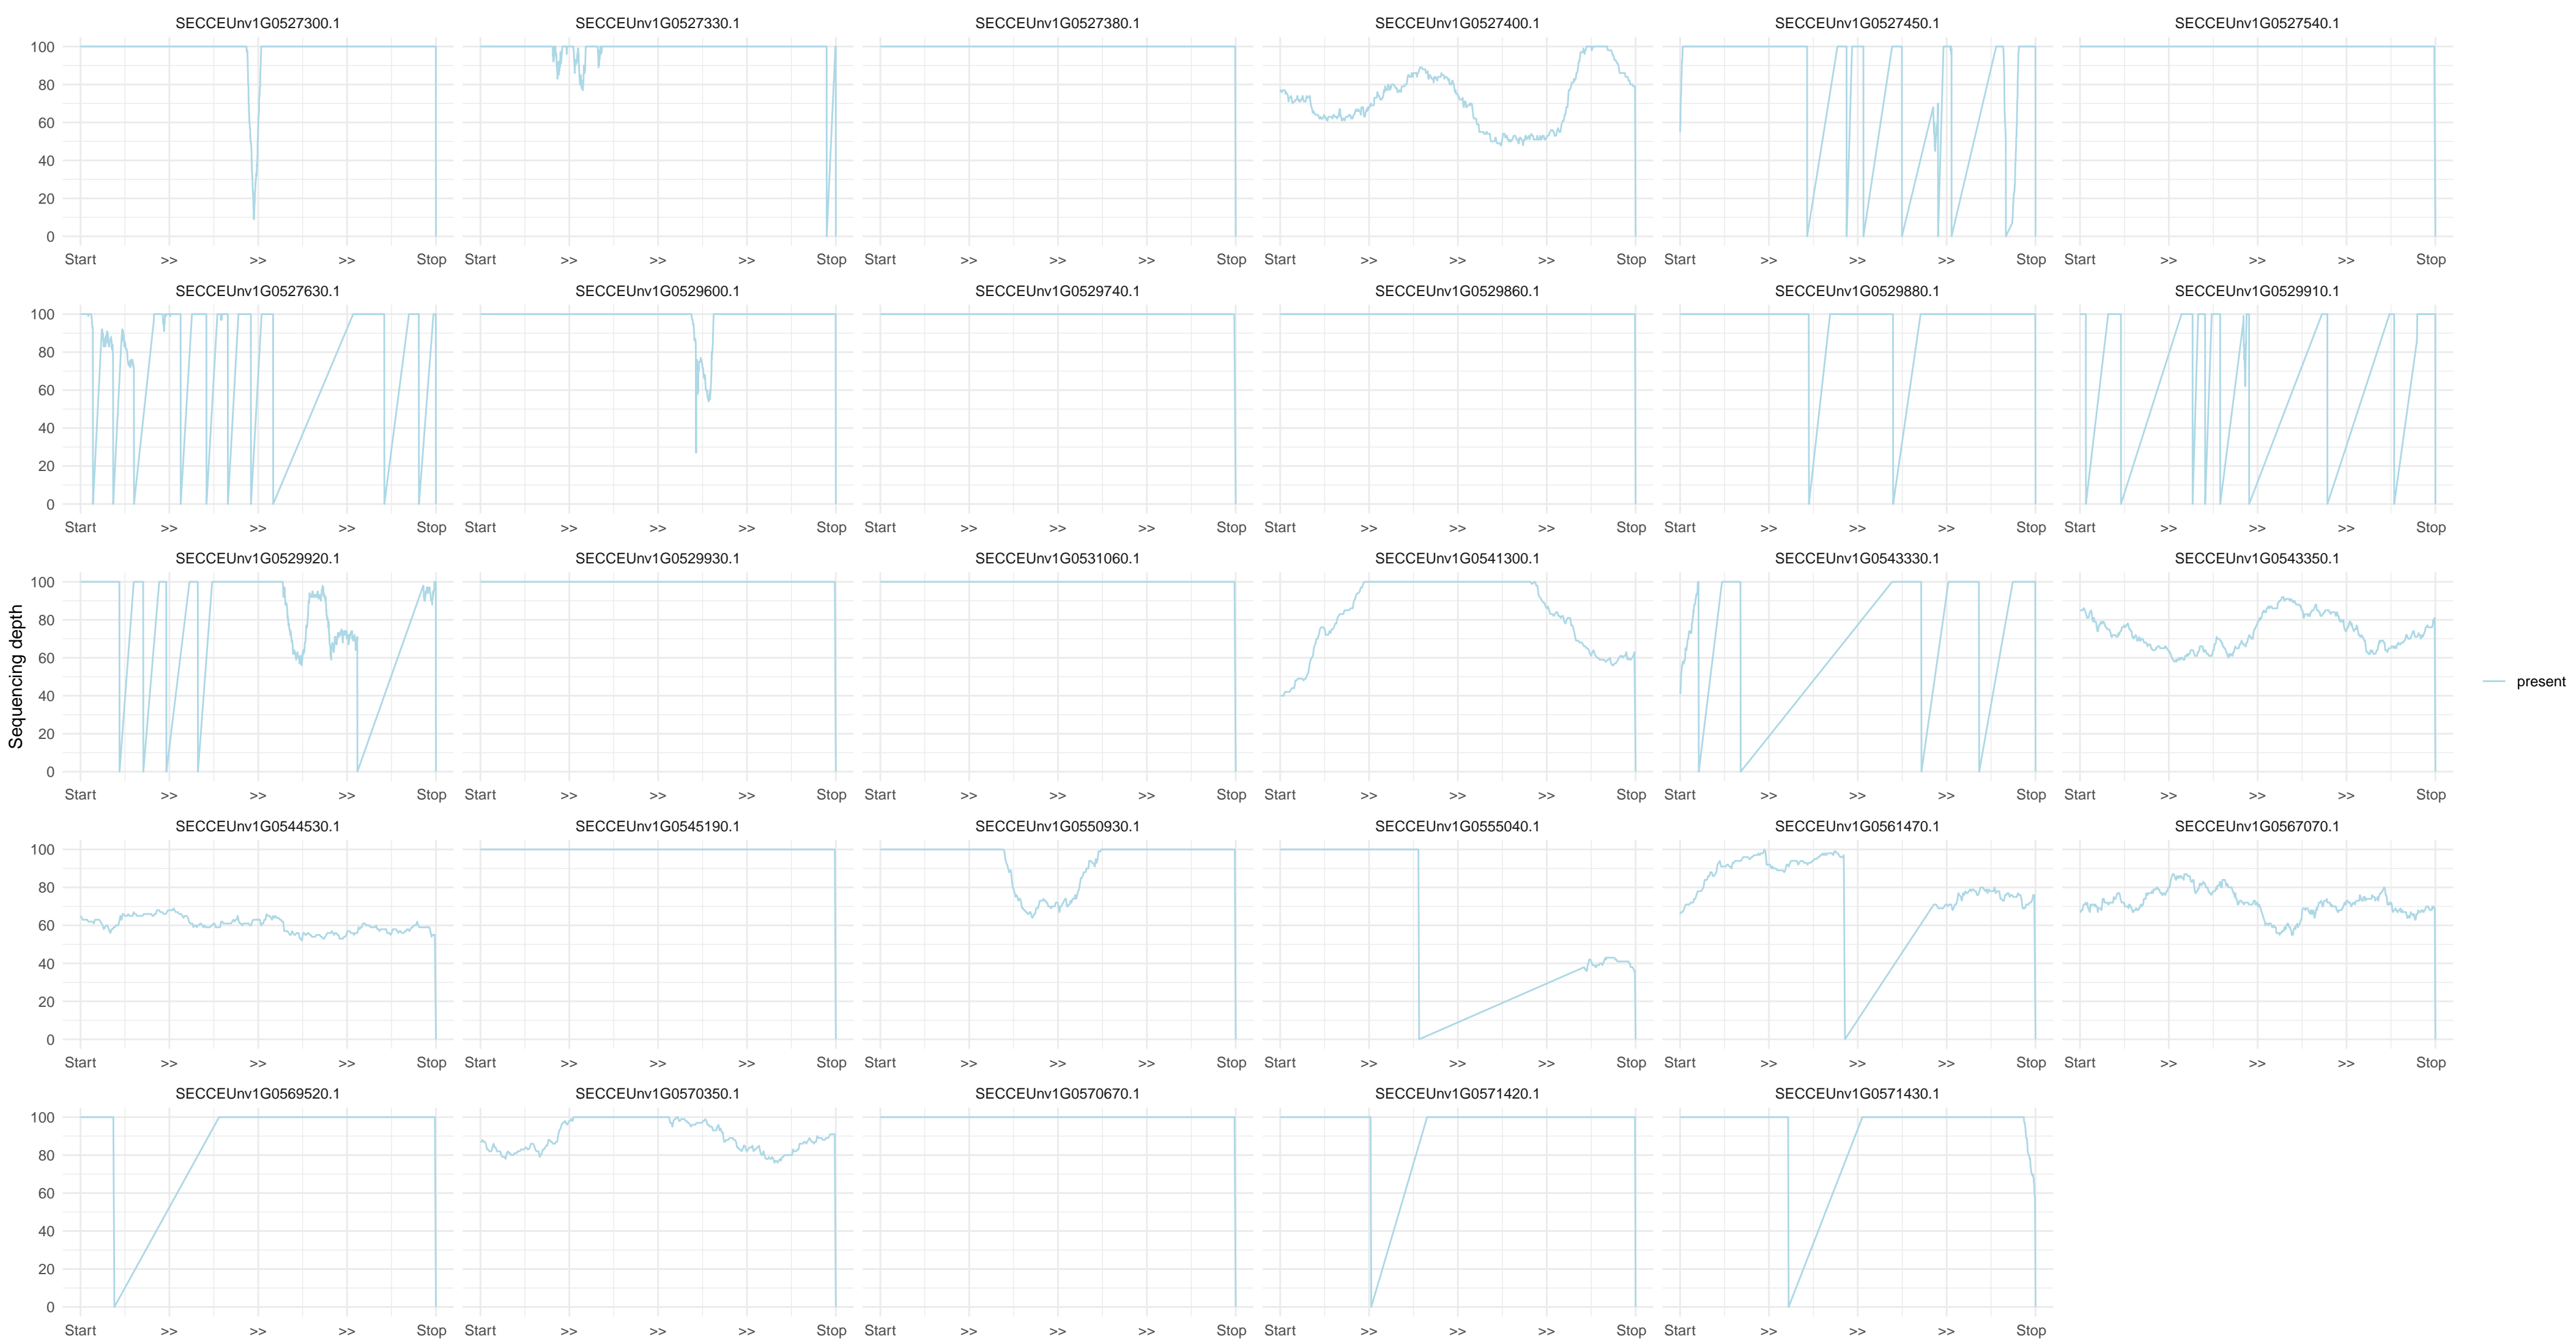

Figure S4 – Io7 genes that are located in unlaced contigs in the Io7 reference assembly, but were called present on the on the isolated chromosome arm 7RS. X axis depicts gene CDS bases, y axis the per-base sequencing depth, capped at 100X.
