# Supplementary material for: Isolation and Sequencing of Chromosome Arm 7RS of Rye, Secale cereale
Source: MDPI journal article supplement (doi:10.3390/ijms231911106), 2022-09-21
Supplement: s1 [file s1]

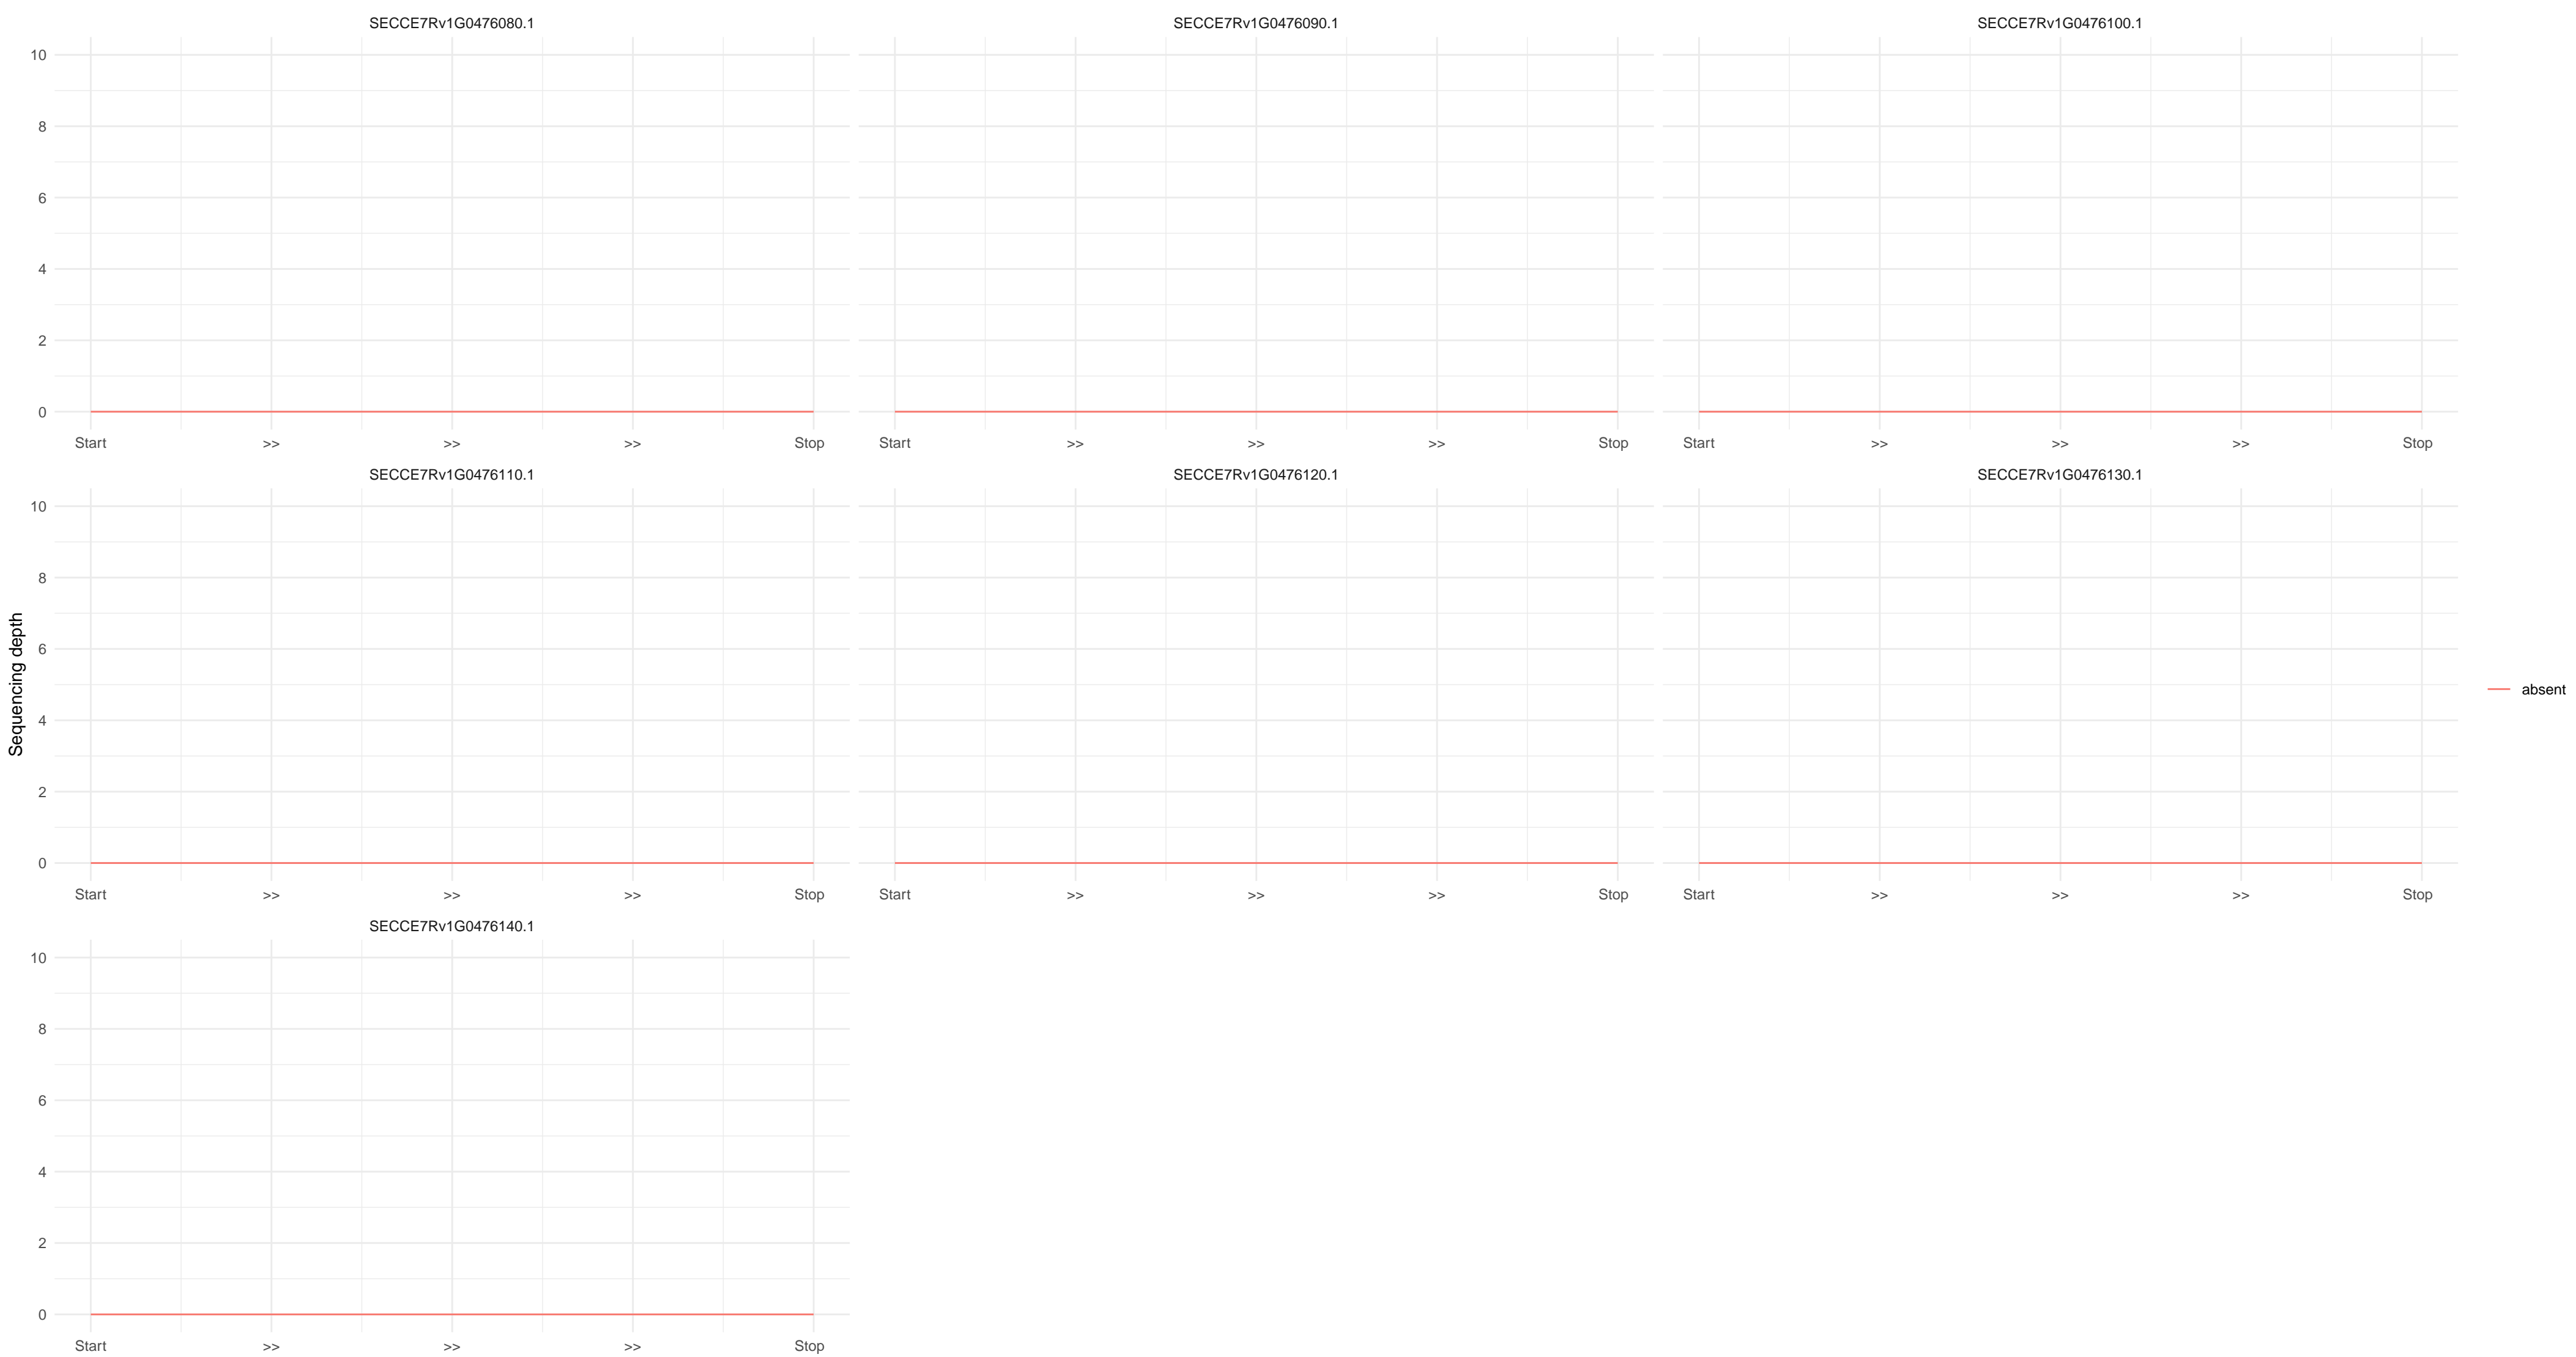

Figure S2– Cluster 1 gene sequencing depth. X axis depicts gene CDS bases, y axis the per-base sequencing depth.
