# Supplementary material for: Isolation and Sequencing of Chromosome Arm 7RS of Rye, Secale cereale
Source: Int J Mol Sci. 2022 Sep 21;23(19):11106. doi: 10.3390/ijms231911106 (PMC9569962; doi:10.3390/ijms231911106)
Supplement: Supplementary file 1 [file ijms-23-11106-s001.zip]

Archive with 7 entries (7 files):
- Figure S1 - PAV_7RS_histogram.jpg
- Figure S2 - cluster1 missing genes.pdf
- Figure S3 - cluster2 missing genes.pdf
- Figure S4 - unplaced lo7 genes present on isolated 7RS.pdf
- Table_S1 Pav stats.xlsx
- Table_S2 Lo7 unplaced genes present on 7RS.xlsx
- Table_S3 genes in missing clusters.xlsx
