# Supplementary material for: Isolation and Sequencing of Chromosome Arm 7RS of Rye, Secale cereale
Source: Int J Mol Sci. 2022 Sep 21;23(19):11106. doi: 10.3390/ijms231911106 (PMC9569962; doi:10.3390/ijms231911106)
Supplement: Supplementary file 1 [file ijms-23-11106-s001.zip › Table_S1 Pav stats.xlsx]

## Sheet: pav_stats
Table S1: Statistics of present and absent genes on 7RS.
Chromosome	Start	end	V5	V6	V7	V8	V9	V10	parent	overlap_length	pav	origin	individual	gene	type	value
chr7R	9367	11281	.	-	PGSB	exon	.	ID=SECCE7Rv1G0453850.1.exon.1;Parent=SECCE7Rv1G0453850.1	SECCE7Rv1G0453850.1	0	absent	Chromosome	lo7-cs_q30_rye_filter	SECCE7Rv1G0453850.1	Coverage	0
chr7R	33518	33716	.	-	PGSB	exon	.	ID=SECCE7Rv1G0453860.1.exon.1;Parent=SECCE7Rv1G0453860.1	SECCE7Rv1G0453860.1	0	absent	Chromosome	lo7-cs_q30_rye_filter	SECCE7Rv1G0453860.1	Coverage	0
chr7R	48106	48286	.	-	PGSB	exon	.	ID=SECCE7Rv1G0453870.1.exon.1;Parent=SECCE7Rv1G0453870.1	SECCE7Rv1G0453870.1	1860	present	Chromosome	lo7-cs_q30_rye_filter	SECCE7Rv1G0453870.1	Coverage	100
chr7R	179253	179930	.	-	PGSB	exon	.	ID=SECCE7Rv1G0453880.1.exon.1;Parent=SECCE7Rv1G0453880.1	SECCE7Rv1G0453880.1	0	absent	Chromosome	lo7-cs_q30_rye_filter	SECCE7Rv1G0453880.1	Coverage	0
chr7R	181619	184529	.	+	PGSB	exon	.	ID=SECCE7Rv1G0453890.1.exon.1;Parent=SECCE7Rv1G0453890.1	SECCE7Rv1G0453890.1	1517	present	Chromosome	lo7-cs_q30_rye_filter	SECCE7Rv1G0453890.1	Coverage	52.1306
chr7R	199424	201074	.	+	PGSB	exon	.	ID=SECCE7Rv1G0453900.1.exon.1;Parent=SECCE7Rv1G0453900.1	SECCE7Rv1G0453900.1	1650	present	Chromosome	lo7-cs_q30_rye_filter	SECCE7Rv1G0453900.1	Coverage	100
chr7R	209876	210605	.	+	PGSB	exon	.	ID=SECCE7Rv1G0453910.1.exon.1;Parent=SECCE7Rv1G0453910.1	SECCE7Rv1G0453910.1	815	present	Chromosome	lo7-cs_q30_rye_filter	SECCE7Rv1G0453910.1	Coverage	61.0487
chr7R	215361	215440	.	-	PGSB	exon	.	ID=SECCE7Rv1G0453920.1.exon.1;Parent=SECCE7Rv1G0453920.1	SECCE7Rv1G0453920.1	977	present	Chromosome	lo7-cs_q30_rye_filter	SECCE7Rv1G0453920.1	Coverage	87.0766
chr7R	232853	233003	.	+	PGSB	exon	.	ID=SECCE7Rv1G0453930.1.exon.1;Parent=SECCE7Rv1G0453930.1	SECCE7Rv1G0453930.1	712	present	Chromosome	lo7-cs_q30_rye_filter	SECCE7Rv1G0453930.1	Coverage	34.2472
chr7R	288326	288887	.	+	PGSB	exon	.	ID=SECCE7Rv1G0453940.1.exon.1;Parent=SECCE7Rv1G0453940.1	SECCE7Rv1G0453940.1	501	present	Chromosome	lo7-cs_q30_rye_filter	SECCE7Rv1G0453940.1	Coverage	89.3048
chr7R	420285	420534	.	+	PGSB	exon	.	ID=SECCE7Rv1G0453950.1.exon.1;Parent=SECCE7Rv1G0453950.1	SECCE7Rv1G0453950.1	0	absent	Chromosome	lo7-cs_q30_rye_filter	SECCE7Rv1G0453950.1	Coverage	0
chr7R	558830	559597	.	+	PGSB	exon	.	ID=SECCE7Rv1G0453960.1.exon.1;Parent=SECCE7Rv1G0453960.1	SECCE7Rv1G0453960.1	3125	present	Chromosome	lo7-cs_q30_rye_filter	SECCE7Rv1G0453960.1	Coverage	54.31
chr7R	700334	700619	.	+	PGSB	exon	.	ID=SECCE7Rv1G0453970.1.exon.1;Parent=SECCE7Rv1G0453970.1	SECCE7Rv1G0453970.1	0	absent	Chromosome	lo7-cs_q30_rye_filter	SECCE7Rv1G0453970.1	Coverage	0
chr7R	701100	701520	.	+	PGSB	exon	.	ID=SECCE7Rv1G0453980.1.exon.1;Parent=SECCE7Rv1G0453980.1	SECCE7Rv1G0453980.1	0	absent	Chromosome	lo7-cs_q30_rye_filter	SECCE7Rv1G0453980.1	Coverage	0
chr7R	701544	702045	.	+	PGSB	exon	.	ID=SECCE7Rv1G0453990.1.exon.1;Parent=SECCE7Rv1G0453990.1	SECCE7Rv1G0453990.1	0	absent	Chromosome	lo7-cs_q30_rye_filter	SECCE7Rv1G0453990.1	Coverage	0
chr7R	775249	775534	.	+	PGSB	exon	.	ID=SECCE7Rv1G0454000.1.exon.1;Parent=SECCE7Rv1G0454000.1	SECCE7Rv1G0454000.1	524	present	Chromosome	lo7-cs_q30_rye_filter	SECCE7Rv1G0454000.1	Coverage	30.8054
chr7R	782126	782140	.	-	PGSB	exon	.	ID=SECCE7Rv1G0454010.1.exon.1;Parent=SECCE7Rv1G0454010.1	SECCE7Rv1G0454010.1	0	absent	Chromosome	lo7-cs_q30_rye_filter	SECCE7Rv1G0454010.1	Coverage	0
chr7R	821801	822086	.	+	PGSB	exon	.	ID=SECCE7Rv1G0454020.1.exon.1;Parent=SECCE7Rv1G0454020.1	SECCE7Rv1G0454020.1	54	present	Chromosome	lo7-cs_q30_rye_filter	SECCE7Rv1G0454020.1	Coverage	5.78778
chr7R	822978	823479	.	+	PGSB	exon	.	ID=SECCE7Rv1G0454030.1.exon.1;Parent=SECCE7Rv1G0454030.1	SECCE7Rv1G0454030.1	90	present	Chromosome	lo7-cs_q30_rye_filter	SECCE7Rv1G0454030.1	Coverage	17.9641
chr7R	855533	855615	.	+	PGSB	exon	.	ID=SECCE7Rv1G0454040.1.exon.1;Parent=SECCE7Rv1G0454040.1	SECCE7Rv1G0454040.1	1287	present	Chromosome	lo7-cs_q30_rye_filter	SECCE7Rv1G0454040.1	Coverage	100
chr7R	977898	978696	.	+	PGSB	exon	.	ID=SECCE7Rv1G0454050.1.exon.1;Parent=SECCE7Rv1G0454050.1	SECCE7Rv1G0454050.1	1155	present	Chromosome	lo7-cs_q30_rye_filter	SECCE7Rv1G0454050.1	Coverage	100
chr7R	1133450	1134311	.	-	PGSB	exon	.	ID=SECCE7Rv1G0454060.1.exon.1;Parent=SECCE7Rv1G0454060.1	SECCE7Rv1G0454060.1	682	present	Chromosome	lo7-cs_q30_rye_filter	SECCE7Rv1G0454060.1	Coverage	79.2102
chr7R	1139249	1139938	.	+	PGSB	exon	.	ID=SECCE7Rv1G0454070.1.exon.1;Parent=SECCE7Rv1G0454070.1	SECCE7Rv1G0454070.1	0	absent	Chromosome	lo7-cs_q30_rye_filter	SECCE7Rv1G0454070.1	Coverage	0
chr7R	1143294	1143354	.	+	PGSB	exon	.	ID=SECCE7Rv1G0454080.1.exon.1;Parent=SECCE7Rv1G0454080.1	SECCE7Rv1G0454080.1	0	absent	Chromosome	lo7-cs_q30_rye_filter	SECCE7Rv1G0454080.1	Coverage	0
chr7R	1220804	1221269	.	-	PGSB	exon	.	ID=SECCE7Rv1G0454090.1.exon.1;Parent=SECCE7Rv1G0454090.1	SECCE7Rv1G0454090.1	287	present	Chromosome	lo7-cs_q30_rye_filter	SECCE7Rv1G0454090.1	Coverage	61.7204
chr7R	1254851	1255073	.	-	PGSB	exon	.	ID=SECCE7Rv1G0454100.1.exon.1;Parent=SECCE7Rv1G0454100.1	SECCE7Rv1G0454100.1	5005	present	Chromosome	lo7-cs_q30_rye_filter	SECCE7Rv1G0454100.1	Coverage	90.4246
chr7R	1345190	1345436	.	-	PGSB	exon	.	ID=SECCE7Rv1G0454110.1.exon.1;Parent=SECCE7Rv1G0454110.1	SECCE7Rv1G0454110.1	1480	present	Chromosome	lo7-cs_q30_rye_filter	SECCE7Rv1G0454110.1	Coverage	26.1023
chr7R	1508096	1509602	.	+	PGSB	exon	.	ID=SECCE7Rv1G0454120.1.exon.1;Parent=SECCE7Rv1G0454120.1	SECCE7Rv1G0454120.1	1506	present	Chromosome	lo7-cs_q30_rye_filter	SECCE7Rv1G0454120.1	Coverage	100
chr7R	1511703	1511883	.	-	PGSB	exon	.	ID=SECCE7Rv1G0454130.1.exon.1;Parent=SECCE7Rv1G0454130.1	SECCE7Rv1G0454130.1	1149	present	Chromosome	lo7-cs_q30_rye_filter	SECCE7Rv1G0454130.1	Coverage	100
chr7R	1519657	1520111	.	-	PGSB	exon	.	ID=SECCE7Rv1G0454140.1.exon.1;Parent=SECCE7Rv1G0454140.1	SECCE7Rv1G0454140.1	672	present	Chromosome	lo7-cs_q30_rye_filter	SECCE7Rv1G0454140.1	Coverage	100
chr7R	1522445	1522685	.	+	PGSB	exon	.	ID=SECCE7Rv1G0454150.1.exon.1;Parent=SECCE7Rv1G0454150.1	SECCE7Rv1G0454150.1	498	present	Chromosome	lo7-cs_q30_rye_filter	SECCE7Rv1G0454150.1	Coverage	100
chr7R	1530473	1531097	.	+	PGSB	exon	.	ID=SECCE7Rv1G0454160.1.exon.1;Parent=SECCE7Rv1G0454160.1	SECCE7Rv1G0454160.1	624	present	Chromosome	lo7-cs_q30_rye_filter	SECCE7Rv1G0454160.1	Coverage	100
chr7R	1552117	1552179	.	-	PGSB	exon	.	ID=SECCE7Rv1G0454170.1.exon.1;Parent=SECCE7Rv1G0454170.1	SECCE7Rv1G0454170.1	1177	present	Chromosome	lo7-cs_q30_rye_filter	SECCE7Rv1G0454170.1	Coverage	80.8935
chr7R	1712437	1712536	.	+	PGSB	exon	.	ID=SECCE7Rv1G0454180.1.exon.1;Parent=SECCE7Rv1G0454180.1	SECCE7Rv1G0454180.1	462	present	Chromosome	lo7-cs_q30_rye_filter	SECCE7Rv1G0454180.1	Coverage	60.1562
chr7R	1724888	1726186	.	+	PGSB	exon	.	ID=SECCE7Rv1G0454190.1.exon.1;Parent=SECCE7Rv1G0454190.1	SECCE7Rv1G0454190.1	586	present	Chromosome	lo7-cs_q30_rye_filter	SECCE7Rv1G0454190.1	Coverage	44.6987
chr7R	1907653	1907926	.	+	PGSB	exon	.	ID=SECCE7Rv1G0454200.1.exon.1;Parent=SECCE7Rv1G0454200.1	SECCE7Rv1G0454200.1	129	present	Chromosome	lo7-cs_q30_rye_filter	SECCE7Rv1G0454200.1	Coverage	29.8611
chr7R	1920190	1921011	.	+	PGSB	exon	.	ID=SECCE7Rv1G0454210.1.exon.1;Parent=SECCE7Rv1G0454210.1	SECCE7Rv1G0454210.1	286	present	Chromosome	lo7-cs_q30_rye_filter	SECCE7Rv1G0454210.1	Coverage	10.0563
chr7R	1927755	1928582	.	+	PGSB	exon	.	ID=SECCE7Rv1G0454220.1.exon.1;Parent=SECCE7Rv1G0454220.1	SECCE7Rv1G0454220.1	0	absent	Chromosome	lo7-cs_q30_rye_filter	SECCE7Rv1G0454220.1	Coverage	0
chr7R	1959945	1960201	.	+	PGSB	exon	.	ID=SECCE7Rv1G0454230.1.exon.1;Parent=SECCE7Rv1G0454230.1	SECCE7Rv1G0454230.1	0	absent	Chromosome	lo7-cs_q30_rye_filter	SECCE7Rv1G0454230.1	Coverage	0
chr7R	2025732	2026236	.	-	PGSB	exon	.	ID=SECCE7Rv1G0454240.1.exon.1;Parent=SECCE7Rv1G0454240.1	SECCE7Rv1G0454240.1	499	present	Chromosome	lo7-cs_q30_rye_filter	SECCE7Rv1G0454240.1	Coverage	99.0079
chr7R	2031130	2032222	.	+	PGSB	exon	.	ID=SECCE7Rv1G0454250.1.exon.1;Parent=SECCE7Rv1G0454250.1	SECCE7Rv1G0454250.1	386	present	Chromosome	lo7-cs_q30_rye_filter	SECCE7Rv1G0454250.1	Coverage	35.348
chr7R	2032385	2032745	.	-	PGSB	exon	.	ID=SECCE7Rv1G0454260.1.exon.1;Parent=SECCE7Rv1G0454260.1	SECCE7Rv1G0454260.1	63	present	Chromosome	lo7-cs_q30_rye_filter	SECCE7Rv1G0454260.1	Coverage	17.5
chr7R	2032756	2032896	.	-	PGSB	exon	.	ID=SECCE7Rv1G0454270.1.exon.1;Parent=SECCE7Rv1G0454270.1	SECCE7Rv1G0454270.1	427	present	Chromosome	lo7-cs_q30_rye_filter	SECCE7Rv1G0454270.1	Coverage	76.1141
chr7R	2040242	2040357	.	-	PGSB	exon	.	ID=SECCE7Rv1G0454280.1.exon.1;Parent=SECCE7Rv1G0454280.1	SECCE7Rv1G0454280.1	3676	present	Chromosome	lo7-cs_q30_rye_filter	SECCE7Rv1G0454280.1	Coverage	82.8488
chr7R	2059851	2060394	.	-	PGSB	exon	.	ID=SECCE7Rv1G0454290.1.exon.1;Parent=SECCE7Rv1G0454290.1	SECCE7Rv1G0454290.1	543	present	Chromosome	lo7-cs_q30_rye_filter	SECCE7Rv1G0454290.1	Coverage	100
chr7R	2066587	2067136	.	-	PGSB	exon	.	ID=SECCE7Rv1G0454300.1.exon.1;Parent=SECCE7Rv1G0454300.1	SECCE7Rv1G0454300.1	486	present	Chromosome	lo7-cs_q30_rye_filter	SECCE7Rv1G0454300.1	Coverage	88.5246
chr7R	2107494	2108037	.	+	PGSB	exon	.	ID=SECCE7Rv1G0454310.1.exon.1;Parent=SECCE7Rv1G0454310.1	SECCE7Rv1G0454310.1	543	present	Chromosome	lo7-cs_q30_rye_filter	SECCE7Rv1G0454310.1	Coverage	100
chr7R	2162156	2162384	.	-	PGSB	exon	.	ID=SECCE7Rv1G0454320.1.exon.1;Parent=SECCE7Rv1G0454320.1	SECCE7Rv1G0454320.1	1180	present	Chromosome	lo7-cs_q30_rye_filter	SECCE7Rv1G0454320.1	Coverage	95.0081
chr7R	2273117	2273335	.	-	PGSB	exon	.	ID=SECCE7Rv1G0454330.1.exon.1;Parent=SECCE7Rv1G0454330.1	SECCE7Rv1G0454330.1	1488	present	Chromosome	lo7-cs_q30_rye_filter	SECCE7Rv1G0454330.1	Coverage	100
chr7R	2274954	2275875	.	-	PGSB	exon	.	ID=SECCE7Rv1G0454340.1.exon.1;Parent=SECCE7Rv1G0454340.1	SECCE7Rv1G0454340.1	921	present	Chromosome	lo7-cs_q30_rye_filter	SECCE7Rv1G0454340.1	Coverage	100
chr7R	2293225	2296330	.	-	PGSB	exon	.	ID=SECCE7Rv1G0454350.1.exon.1;Parent=SECCE7Rv1G0454350.1	SECCE7Rv1G0454350.1	0	absent	Chromosome	lo7-cs_q30_rye_filter	SECCE7Rv1G0454350.1	Coverage	0
chr7R	2339402	2340278	.	-	PGSB	exon	.	ID=SECCE7Rv1G0454360.1.exon.1;Parent=SECCE7Rv1G0454360.1	SECCE7Rv1G0454360.1	545	present	Chromosome	lo7-cs_q30_rye_filter	SECCE7Rv1G0454360.1	Coverage	62.2146
chr7R	2357495	2357876	.	-	PGSB	exon	.	ID=SECCE7Rv1G0454370.1.exon.1;Parent=SECCE7Rv1G0454370.1	SECCE7Rv1G0454370.1	192	present	Chromosome	lo7-cs_q30_rye_filter	SECCE7Rv1G0454370.1	Coverage	50.3937
chr7R	2364638	2368865	.	-	PGSB	exon	.	ID=SECCE7Rv1G0454380.1.exon.1;Parent=SECCE7Rv1G0454380.1	SECCE7Rv1G0454380.1	586	present	Chromosome	lo7-cs_q30_rye_filter	SECCE7Rv1G0454380.1	Coverage	13.8633
chr7R	2408089	2412070	.	-	PGSB	exon	.	ID=SECCE7Rv1G0454390.1.exon.1;Parent=SECCE7Rv1G0454390.1	SECCE7Rv1G0454390.1	0	absent	Chromosome	lo7-cs_q30_rye_filter	SECCE7Rv1G0454390.1	Coverage	0
chr7R	2467604	2470634	.	-	PGSB	exon	.	ID=SECCE7Rv1G0454400.1.exon.1;Parent=SECCE7Rv1G0454400.1	SECCE7Rv1G0454400.1	1267	present	Chromosome	lo7-cs_q30_rye_filter	SECCE7Rv1G0454400.1	Coverage	41.8152
chr7R	2470774	2471572	.	-	PGSB	exon	.	ID=SECCE7Rv1G0454410.1.exon.1;Parent=SECCE7Rv1G0454410.1	SECCE7Rv1G0454410.1	798	present	Chromosome	lo7-cs_q30_rye_filter	SECCE7Rv1G0454410.1	Coverage	100
chr7R	2532511	2532799	.	-	PGSB	exon	.	ID=SECCE7Rv1G0454420.1.exon.1;Parent=SECCE7Rv1G0454420.1	SECCE7Rv1G0454420.1	2655	present	Chromosome	lo7-cs_q30_rye_filter	SECCE7Rv1G0454420.1	Coverage	100
chr7R	2548696	2548755	.	-	PGSB	exon	.	ID=SECCE7Rv1G0454430.1.exon.1;Parent=SECCE7Rv1G0454430.1	SECCE7Rv1G0454430.1	3813	present	Chromosome	lo7-cs_q30_rye_filter	SECCE7Rv1G0454430.1	Coverage	100
chr7R	2561949	2562336	.	+	PGSB	exon	.	ID=SECCE7Rv1G0454440.1.exon.1;Parent=SECCE7Rv1G0454440.1	SECCE7Rv1G0454440.1	372	present	Chromosome	lo7-cs_q30_rye_filter	SECCE7Rv1G0454440.1	Coverage	96.124
chr7R	2562840	2562984	.	-	PGSB	exon	.	ID=SECCE7Rv1G0454450.1.exon.1;Parent=SECCE7Rv1G0454450.1	SECCE7Rv1G0454450.1	2337	present	Chromosome	lo7-cs_q30_rye_filter	SECCE7Rv1G0454450.1	Coverage	100
chr7R	2579568	2579682	.	+	PGSB	exon	.	ID=SECCE7Rv1G0454460.1.exon.1;Parent=SECCE7Rv1G0454460.1	SECCE7Rv1G0454460.1	273	present	Chromosome	lo7-cs_q30_rye_filter	SECCE7Rv1G0454460.1	Coverage	100
chr7R	2581088	2581282	.	-	PGSB	exon	.	ID=SECCE7Rv1G0454470.1.exon.1;Parent=SECCE7Rv1G0454470.1	SECCE7Rv1G0454470.1	3681	present	Chromosome	lo7-cs_q30_rye_filter	SECCE7Rv1G0454470.1	Coverage	100
chr7R	2798230	2802380	.	+	PGSB	exon	.	ID=SECCE7Rv1G0454480.1.exon.1;Parent=SECCE7Rv1G0454480.1	SECCE7Rv1G0454480.1	4164	present	Chromosome	lo7-cs_q30_rye_filter	SECCE7Rv1G0454480.1	Coverage	100
chr7R	2804937	2809227	.	+	PGSB	exon	.	ID=SECCE7Rv1G0454490.1.exon.1;Parent=SECCE7Rv1G0454490.1	SECCE7Rv1G0454490.1	1047	present	Chromosome	lo7-cs_q30_rye_filter	SECCE7Rv1G0454490.1	Coverage	24.4056
chr7R	2830688	2830994	.	+	PGSB	exon	.	ID=SECCE7Rv1G0454500.1.exon.1;Parent=SECCE7Rv1G0454500.1	SECCE7Rv1G0454500.1	0	absent	Chromosome	lo7-cs_q30_rye_filter	SECCE7Rv1G0454500.1	Coverage	0
chr7R	2865332	2869649	.	+	PGSB	exon	.	ID=SECCE7Rv1G0454510.1.exon.1;Parent=SECCE7Rv1G0454510.1	SECCE7Rv1G0454510.1	4317	present	Chromosome	lo7-cs_q30_rye_filter	SECCE7Rv1G0454510.1	Coverage	100
chr7R	2940915	2941212	.	+	PGSB	exon	.	ID=SECCE7Rv1G0454520.1.exon.1;Parent=SECCE7Rv1G0454520.1	SECCE7Rv1G0454520.1	1440	present	Chromosome	lo7-cs_q30_rye_filter	SECCE7Rv1G0454520.1	Coverage	100
chr7R	2944170	2944770	.	+	PGSB	exon	.	ID=SECCE7Rv1G0454530.1.exon.1;Parent=SECCE7Rv1G0454530.1	SECCE7Rv1G0454530.1	600	present	Chromosome	lo7-cs_q30_rye_filter	SECCE7Rv1G0454530.1	Coverage	100
chr7R	2957186	2957471	.	+	PGSB	exon	.	ID=SECCE7Rv1G0454540.1.exon.1;Parent=SECCE7Rv1G0454540.1	SECCE7Rv1G0454540.1	285	present	Chromosome	lo7-cs_q30_rye_filter	SECCE7Rv1G0454540.1	Coverage	100
chr7R	3103084	3103188	.	-	PGSB	exon	.	ID=SECCE7Rv1G0454550.1.exon.1;Parent=SECCE7Rv1G0454550.1	SECCE7Rv1G0454550.1	723	present	Chromosome	lo7-cs_q30_rye_filter	SECCE7Rv1G0454550.1	Coverage	100
chr7R	3105814	3106369	.	+	PGSB	exon	.	ID=SECCE7Rv1G0454560.1.exon.1;Parent=SECCE7Rv1G0454560.1	SECCE7Rv1G0454560.1	1389	present	Chromosome	lo7-cs_q30_rye_filter	SECCE7Rv1G0454560.1	Coverage	100
chr7R	3109865	3110417	.	-	PGSB	exon	.	ID=SECCE7Rv1G0454570.1.exon.1;Parent=SECCE7Rv1G0454570.1	SECCE7Rv1G0454570.1	510	present	Chromosome	lo7-cs_q30_rye_filter	SECCE7Rv1G0454570.1	Coverage	92.3913
chr7R	3145112	3145385	.	+	PGSB	exon	.	ID=SECCE7Rv1G0454580.1.exon.1;Parent=SECCE7Rv1G0454580.1	SECCE7Rv1G0454580.1	370	present	Chromosome	lo7-cs_q30_rye_filter	SECCE7Rv1G0454580.1	Coverage	23.7179
chr7R	3231248	3231521	.	+	PGSB	exon	.	ID=SECCE7Rv1G0454590.1.exon.1;Parent=SECCE7Rv1G0454590.1	SECCE7Rv1G0454590.1	0	absent	Chromosome	lo7-cs_q30_rye_filter	SECCE7Rv1G0454590.1	Coverage	0
chr7R	3307091	3309671	.	+	PGSB	exon	.	ID=SECCE7Rv1G0454600.1.exon.1;Parent=SECCE7Rv1G0454600.1	SECCE7Rv1G0454600.1	2580	present	Chromosome	lo7-cs_q30_rye_filter	SECCE7Rv1G0454600.1	Coverage	100
chr7R	3407158	3407297	.	+	PGSB	exon	.	ID=SECCE7Rv1G0454610.1.exon.1;Parent=SECCE7Rv1G0454610.1	SECCE7Rv1G0454610.1	715	present	Chromosome	lo7-cs_q30_rye_filter	SECCE7Rv1G0454610.1	Coverage	84.2167
chr7R	3521041	3521266	.	-	PGSB	exon	.	ID=SECCE7Rv1G0454620.1.exon.1;Parent=SECCE7Rv1G0454620.1	SECCE7Rv1G0454620.1	0	absent	Chromosome	lo7-cs_q30_rye_filter	SECCE7Rv1G0454620.1	Coverage	0
chr7R	3530210	3530603	.	-	PGSB	exon	.	ID=SECCE7Rv1G0454630.1.exon.1;Parent=SECCE7Rv1G0454630.1	SECCE7Rv1G0454630.1	0	absent	Chromosome	lo7-cs_q30_rye_filter	SECCE7Rv1G0454630.1	Coverage	0
chr7R	3531353	3531362	.	-	PGSB	exon	.	ID=SECCE7Rv1G0454640.1.exon.1;Parent=SECCE7Rv1G0454640.1	SECCE7Rv1G0454640.1	0	absent	Chromosome	lo7-cs_q30_rye_filter	SECCE7Rv1G0454640.1	Coverage	0
chr7R	3613111	3613315	.	-	PGSB	exon	.	ID=SECCE7Rv1G0454650.1.exon.1;Parent=SECCE7Rv1G0454650.1	SECCE7Rv1G0454650.1	929	present	Chromosome	lo7-cs_q30_rye_filter	SECCE7Rv1G0454650.1	Coverage	81.4912
chr7R	3635629	3636973	.	+	PGSB	exon	.	ID=SECCE7Rv1G0454660.1.exon.1;Parent=SECCE7Rv1G0454660.1	SECCE7Rv1G0454660.1	1314	present	Chromosome	lo7-cs_q30_rye_filter	SECCE7Rv1G0454660.1	Coverage	97.7679
chr7R	3678270	3679344	.	-	PGSB	exon	.	ID=SECCE7Rv1G0454670.1.exon.1;Parent=SECCE7Rv1G0454670.1	SECCE7Rv1G0454670.1	936	present	Chromosome	lo7-cs_q30_rye_filter	SECCE7Rv1G0454670.1	Coverage	87.1508
chr7R	3686952	3687147	.	-	PGSB	exon	.	ID=SECCE7Rv1G0454680.1.exon.1;Parent=SECCE7Rv1G0454680.1	SECCE7Rv1G0454680.1	1670	present	Chromosome	lo7-cs_q30_rye_filter	SECCE7Rv1G0454680.1	Coverage	95.1567
chr7R	3753093	3754857	.	+	PGSB	exon	.	ID=SECCE7Rv1G0454690.1.exon.1;Parent=SECCE7Rv1G0454690.1	SECCE7Rv1G0454690.1	0	absent	Chromosome	lo7-cs_q30_rye_filter	SECCE7Rv1G0454690.1	Coverage	0
chr7R	3850527	3850725	.	-	PGSB	exon	.	ID=SECCE7Rv1G0454700.1.exon.1;Parent=SECCE7Rv1G0454700.1	SECCE7Rv1G0454700.1	0	absent	Chromosome	lo7-cs_q30_rye_filter	SECCE7Rv1G0454700.1	Coverage	0
chr7R	3907671	3908463	.	-	PGSB	exon	.	ID=SECCE7Rv1G0454710.1.exon.1;Parent=SECCE7Rv1G0454710.1	SECCE7Rv1G0454710.1	0	absent	Chromosome	lo7-cs_q30_rye_filter	SECCE7Rv1G0454710.1	Coverage	0
chr7R	4017064	4017709	.	+	PGSB	exon	.	ID=SECCE7Rv1G0454720.1.exon.1;Parent=SECCE7Rv1G0454720.1	SECCE7Rv1G0454720.1	421	present	Chromosome	lo7-cs_q30_rye_filter	SECCE7Rv1G0454720.1	Coverage	65.2713
chr7R	4060294	4060325	.	+	PGSB	exon	.	ID=SECCE7Rv1G0454730.1.exon.1;Parent=SECCE7Rv1G0454730.1	SECCE7Rv1G0454730.1	0	absent	Chromosome	lo7-cs_q30_rye_filter	SECCE7Rv1G0454730.1	Coverage	0
chr7R	4060932	4061301	.	+	PGSB	exon	.	ID=SECCE7Rv1G0454740.1.exon.1;Parent=SECCE7Rv1G0454740.1	SECCE7Rv1G0454740.1	0	absent	Chromosome	lo7-cs_q30_rye_filter	SECCE7Rv1G0454740.1	Coverage	0
chr7R	4135740	4136198	.	+	PGSB	exon	.	ID=SECCE7Rv1G0454750.1.exon.1;Parent=SECCE7Rv1G0454750.1	SECCE7Rv1G0454750.1	1089	present	Chromosome	lo7-cs_q30_rye_filter	SECCE7Rv1G0454750.1	Coverage	100
chr7R	4216779	4217085	.	-	PGSB	exon	.	ID=SECCE7Rv1G0454760.1.exon.1;Parent=SECCE7Rv1G0454760.1	SECCE7Rv1G0454760.1	306	present	Chromosome	lo7-cs_q30_rye_filter	SECCE7Rv1G0454760.1	Coverage	100
chr7R	4218878	4218959	.	-	PGSB	exon	.	ID=SECCE7Rv1G0454770.1.exon.1;Parent=SECCE7Rv1G0454770.1	SECCE7Rv1G0454770.1	625	present	Chromosome	lo7-cs_q30_rye_filter	SECCE7Rv1G0454770.1	Coverage	84.3455
chr7R	4278901	4279204	.	-	PGSB	exon	.	ID=SECCE7Rv1G0454780.1.exon.1;Parent=SECCE7Rv1G0454780.1	SECCE7Rv1G0454780.1	303	present	Chromosome	lo7-cs_q30_rye_filter	SECCE7Rv1G0454780.1	Coverage	100
chr7R	4279455	4279734	.	-	PGSB	exon	.	ID=SECCE7Rv1G0454790.1.exon.1;Parent=SECCE7Rv1G0454790.1	SECCE7Rv1G0454790.1	218	present	Chromosome	lo7-cs_q30_rye_filter	SECCE7Rv1G0454790.1	Coverage	78.1362
chr7R	4321614	4321992	.	-	PGSB	exon	.	ID=SECCE7Rv1G0454800.1.exon.1;Parent=SECCE7Rv1G0454800.1	SECCE7Rv1G0454800.1	200	present	Chromosome	lo7-cs_q30_rye_filter	SECCE7Rv1G0454800.1	Coverage	52.9101
chr7R	4322612	4323008	.	-	PGSB	exon	.	ID=SECCE7Rv1G0454810.1.exon.1;Parent=SECCE7Rv1G0454810.1	SECCE7Rv1G0454810.1	0	absent	Chromosome	lo7-cs_q30_rye_filter	SECCE7Rv1G0454810.1	Coverage	0
chr7R	4324391	4324769	.	-	PGSB	exon	.	ID=SECCE7Rv1G0454820.1.exon.1;Parent=SECCE7Rv1G0454820.1	SECCE7Rv1G0454820.1	0	absent	Chromosome	lo7-cs_q30_rye_filter	SECCE7Rv1G0454820.1	Coverage	0
chr7R	4342457	4342883	.	-	PGSB	exon	.	ID=SECCE7Rv1G0454830.1.exon.1;Parent=SECCE7Rv1G0454830.1	SECCE7Rv1G0454830.1	0	absent	Chromosome	lo7-cs_q30_rye_filter	SECCE7Rv1G0454830.1	Coverage	0
chr7R	4345236	4346019	.	-	PGSB	exon	.	ID=SECCE7Rv1G0454840.1.exon.1;Parent=SECCE7Rv1G0454840.1	SECCE7Rv1G0454840.1	0	absent	Chromosome	lo7-cs_q30_rye_filter	SECCE7Rv1G0454840.1	Coverage	0
chr7R	4486427	4486552	.	-	PGSB	exon	.	ID=SECCE7Rv1G0454850.1.exon.1;Parent=SECCE7Rv1G0454850.1	SECCE7Rv1G0454850.1	731	present	Chromosome	lo7-cs_q30_rye_filter	SECCE7Rv1G0454850.1	Coverage	80.9524
chr7R	4492602	4492809	.	+	PGSB	exon	.	ID=SECCE7Rv1G0454860.1.exon.1;Parent=SECCE7Rv1G0454860.1	SECCE7Rv1G0454860.1	801	present	Chromosome	lo7-cs_q30_rye_filter	SECCE7Rv1G0454860.1	Coverage	79.4643
chr7R	4495585	4495677	.	-	PGSB	exon	.	ID=SECCE7Rv1G0454870.1.exon.1;Parent=SECCE7Rv1G0454870.1	SECCE7Rv1G0454870.1	1209	present	Chromosome	lo7-cs_q30_rye_filter	SECCE7Rv1G0454870.1	Coverage	80.9237
chr7R	4692543	4692723	.	+	PGSB	exon	.	ID=SECCE7Rv1G0454880.1.exon.1;Parent=SECCE7Rv1G0454880.1	SECCE7Rv1G0454880.1	432	present	Chromosome	lo7-cs_q30_rye_filter	SECCE7Rv1G0454880.1	Coverage	100
chr7R	4694309	4694370	.	-	PGSB	exon	.	ID=SECCE7Rv1G0454890.1.exon.1;Parent=SECCE7Rv1G0454890.1	SECCE7Rv1G0454890.1	2121	present	Chromosome	lo7-cs_q30_rye_filter	SECCE7Rv1G0454890.1	Coverage	100
chr7R	4824228	4824519	.	-	PGSB	exon	.	ID=SECCE7Rv1G0454900.1.exon.1;Parent=SECCE7Rv1G0454900.1	SECCE7Rv1G0454900.1	1050	present	Chromosome	lo7-cs_q30_rye_filter	SECCE7Rv1G0454900.1	Coverage	100
chr7R	4827078	4827150	.	-	PGSB	exon	.	ID=SECCE7Rv1G0454910.1.exon.1;Parent=SECCE7Rv1G0454910.1	SECCE7Rv1G0454910.1	444	present	Chromosome	lo7-cs_q30_rye_filter	SECCE7Rv1G0454910.1	Coverage	100
chr7R	4830971	4833095	.	-	PGSB	exon	.	ID=SECCE7Rv1G0454920.1.exon.1;Parent=SECCE7Rv1G0454920.1	SECCE7Rv1G0454920.1	1142	present	Chromosome	lo7-cs_q30_rye_filter	SECCE7Rv1G0454920.1	Coverage	53.7665
chr7R	4834899	4838301	.	-	PGSB	exon	.	ID=SECCE7Rv1G0454930.1.exon.1;Parent=SECCE7Rv1G0454930.1	SECCE7Rv1G0454930.1	3402	present	Chromosome	lo7-cs_q30_rye_filter	SECCE7Rv1G0454930.1	Coverage	100
chr7R	4851968	4852440	.	-	PGSB	exon	.	ID=SECCE7Rv1G0454940.1.exon.1;Parent=SECCE7Rv1G0454940.1	SECCE7Rv1G0454940.1	906	present	Chromosome	lo7-cs_q30_rye_filter	SECCE7Rv1G0454940.1	Coverage	100
chr7R	5042227	5042709	.	+	PGSB	exon	.	ID=SECCE7Rv1G0454950.1.exon.1;Parent=SECCE7Rv1G0454950.1	SECCE7Rv1G0454950.1	1074	present	Chromosome	lo7-cs_q30_rye_filter	SECCE7Rv1G0454950.1	Coverage	100
chr7R	5146670	5146731	.	-	PGSB	exon	.	ID=SECCE7Rv1G0454960.1.exon.1;Parent=SECCE7Rv1G0454960.1	SECCE7Rv1G0454960.1	978	present	Chromosome	lo7-cs_q30_rye_filter	SECCE7Rv1G0454960.1	Coverage	100
chr7R	5194787	5194897	.	-	PGSB	exon	.	ID=SECCE7Rv1G0454970.1.exon.1;Parent=SECCE7Rv1G0454970.1	SECCE7Rv1G0454970.1	375	present	Chromosome	lo7-cs_q30_rye_filter	SECCE7Rv1G0454970.1	Coverage	42.0875
chr7R	5202133	5202748	.	+	PGSB	exon	.	ID=SECCE7Rv1G0454980.1.exon.1;Parent=SECCE7Rv1G0454980.1	SECCE7Rv1G0454980.1	548	present	Chromosome	lo7-cs_q30_rye_filter	SECCE7Rv1G0454980.1	Coverage	67.6543
chr7R	5206972	5207211	.	-	PGSB	exon	.	ID=SECCE7Rv1G0454990.1.exon.1;Parent=SECCE7Rv1G0454990.1	SECCE7Rv1G0454990.1	0	absent	Chromosome	lo7-cs_q30_rye_filter	SECCE7Rv1G0454990.1	Coverage	0
chr7R	5208998	5210525	.	-	PGSB	exon	.	ID=SECCE7Rv1G0455000.1.exon.1;Parent=SECCE7Rv1G0455000.1	SECCE7Rv1G0455000.1	0	absent	Chromosome	lo7-cs_q30_rye_filter	SECCE7Rv1G0455000.1	Coverage	0
chr7R	5232364	5232766	.	-	PGSB	exon	.	ID=SECCE7Rv1G0455010.1.exon.1;Parent=SECCE7Rv1G0455010.1	SECCE7Rv1G0455010.1	0	absent	Chromosome	lo7-cs_q30_rye_filter	SECCE7Rv1G0455010.1	Coverage	0
chr7R	5256187	5256314	.	-	PGSB	exon	.	ID=SECCE7Rv1G0455020.1.exon.1;Parent=SECCE7Rv1G0455020.1	SECCE7Rv1G0455020.1	0	absent	Chromosome	lo7-cs_q30_rye_filter	SECCE7Rv1G0455020.1	Coverage	0
chr7R	5272600	5272727	.	-	PGSB	exon	.	ID=SECCE7Rv1G0455030.1.exon.1;Parent=SECCE7Rv1G0455030.1	SECCE7Rv1G0455030.1	0	absent	Chromosome	lo7-cs_q30_rye_filter	SECCE7Rv1G0455030.1	Coverage	0
chr7R	5279694	5279933	.	-	PGSB	exon	.	ID=SECCE7Rv1G0455040.1.exon.1;Parent=SECCE7Rv1G0455040.1	SECCE7Rv1G0455040.1	150	present	Chromosome	lo7-cs_q30_rye_filter	SECCE7Rv1G0455040.1	Coverage	48.5437
chr7R	5283513	5285046	.	+	PGSB	exon	.	ID=SECCE7Rv1G0455050.1.exon.1;Parent=SECCE7Rv1G0455050.1	SECCE7Rv1G0455050.1	1227	present	Chromosome	lo7-cs_q30_rye_filter	SECCE7Rv1G0455050.1	Coverage	80.0391
chr7R	5289106	5289332	.	+	PGSB	exon	.	ID=SECCE7Rv1G0455060.1.exon.1;Parent=SECCE7Rv1G0455060.1	SECCE7Rv1G0455060.1	0	absent	Chromosome	lo7-cs_q30_rye_filter	SECCE7Rv1G0455060.1	Coverage	0
chr7R	5303026	5303141	.	-	PGSB	exon	.	ID=SECCE7Rv1G0455070.1.exon.1;Parent=SECCE7Rv1G0455070.1	SECCE7Rv1G0455070.1	0	absent	Chromosome	lo7-cs_q30_rye_filter	SECCE7Rv1G0455070.1	Coverage	0
chr7R	5305788	5306100	.	+	PGSB	exon	.	ID=SECCE7Rv1G0455080.1.exon.1;Parent=SECCE7Rv1G0455080.1	SECCE7Rv1G0455080.1	0	absent	Chromosome	lo7-cs_q30_rye_filter	SECCE7Rv1G0455080.1	Coverage	0
chr7R	5312192	5315135	.	+	PGSB	exon	.	ID=SECCE7Rv1G0455090.1.exon.1;Parent=SECCE7Rv1G0455090.1	SECCE7Rv1G0455090.1	2447	present	Chromosome	lo7-cs_q30_rye_filter	SECCE7Rv1G0455090.1	Coverage	83.1464
chr7R	5318344	5321263	.	+	PGSB	exon	.	ID=SECCE7Rv1G0455100.1.exon.1;Parent=SECCE7Rv1G0455100.1	SECCE7Rv1G0455100.1	0	absent	Chromosome	lo7-cs_q30_rye_filter	SECCE7Rv1G0455100.1	Coverage	0
chr7R	5324203	5324318	.	-	PGSB	exon	.	ID=SECCE7Rv1G0455110.1.exon.1;Parent=SECCE7Rv1G0455110.1	SECCE7Rv1G0455110.1	0	absent	Chromosome	lo7-cs_q30_rye_filter	SECCE7Rv1G0455110.1	Coverage	0
chr7R	5332416	5332543	.	-	PGSB	exon	.	ID=SECCE7Rv1G0455120.1.exon.1;Parent=SECCE7Rv1G0455120.1	SECCE7Rv1G0455120.1	0	absent	Chromosome	lo7-cs_q30_rye_filter	SECCE7Rv1G0455120.1	Coverage	0
chr7R	5340231	5340978	.	+	PGSB	exon	.	ID=SECCE7Rv1G0455130.1.exon.1;Parent=SECCE7Rv1G0455130.1	SECCE7Rv1G0455130.1	747	present	Chromosome	lo7-cs_q30_rye_filter	SECCE7Rv1G0455130.1	Coverage	100
chr7R	5360787	5362581	.	+	PGSB	exon	.	ID=SECCE7Rv1G0455140.1.exon.1;Parent=SECCE7Rv1G0455140.1	SECCE7Rv1G0455140.1	0	absent	Chromosome	lo7-cs_q30_rye_filter	SECCE7Rv1G0455140.1	Coverage	0
chr7R	5405021	5405144	.	-	PGSB	exon	.	ID=SECCE7Rv1G0455150.1.exon.1;Parent=SECCE7Rv1G0455150.1	SECCE7Rv1G0455150.1	2379	present	Chromosome	lo7-cs_q30_rye_filter	SECCE7Rv1G0455150.1	Coverage	78.1281
chr7R	5556131	5556581	.	-	PGSB	exon	.	ID=SECCE7Rv1G0455160.1.exon.1;Parent=SECCE7Rv1G0455160.1	SECCE7Rv1G0455160.1	450	present	Chromosome	lo7-cs_q30_rye_filter	SECCE7Rv1G0455160.1	Coverage	100
chr7R	5567560	5567995	.	-	PGSB	exon	.	ID=SECCE7Rv1G0455170.1.exon.1;Parent=SECCE7Rv1G0455170.1	SECCE7Rv1G0455170.1	0	absent	Chromosome	lo7-cs_q30_rye_filter	SECCE7Rv1G0455170.1	Coverage	0
chr7R	5569810	5570248	.	-	PGSB	exon	.	ID=SECCE7Rv1G0455180.1.exon.1;Parent=SECCE7Rv1G0455180.1	SECCE7Rv1G0455180.1	0	absent	Chromosome	lo7-cs_q30_rye_filter	SECCE7Rv1G0455180.1	Coverage	0
chr7R	5576746	5577049	.	-	PGSB	exon	.	ID=SECCE7Rv1G0455190.1.exon.1;Parent=SECCE7Rv1G0455190.1	SECCE7Rv1G0455190.1	0	absent	Chromosome	lo7-cs_q30_rye_filter	SECCE7Rv1G0455190.1	Coverage	0
chr7R	5582759	5584487	.	-	PGSB	exon	.	ID=SECCE7Rv1G0455200.1.exon.1;Parent=SECCE7Rv1G0455200.1	SECCE7Rv1G0455200.1	0	absent	Chromosome	lo7-cs_q30_rye_filter	SECCE7Rv1G0455200.1	Coverage	0
chr7R	5588874	5589312	.	+	PGSB	exon	.	ID=SECCE7Rv1G0455210.1.exon.1;Parent=SECCE7Rv1G0455210.1	SECCE7Rv1G0455210.1	0	absent	Chromosome	lo7-cs_q30_rye_filter	SECCE7Rv1G0455210.1	Coverage	0
chr7R	5669039	5669675	.	-	PGSB	exon	.	ID=SECCE7Rv1G0455220.1.exon.1;Parent=SECCE7Rv1G0455220.1	SECCE7Rv1G0455220.1	0	absent	Chromosome	lo7-cs_q30_rye_filter	SECCE7Rv1G0455220.1	Coverage	0
chr7R	5934127	5934382	.	+	PGSB	exon	.	ID=SECCE7Rv1G0455230.1.exon.1;Parent=SECCE7Rv1G0455230.1	SECCE7Rv1G0455230.1	1359	present	Chromosome	lo7-cs_q30_rye_filter	SECCE7Rv1G0455230.1	Coverage	100
chr7R	5954183	5955779	.	-	PGSB	exon	.	ID=SECCE7Rv1G0455240.1.exon.1;Parent=SECCE7Rv1G0455240.1	SECCE7Rv1G0455240.1	463	present	Chromosome	lo7-cs_q30_rye_filter	SECCE7Rv1G0455240.1	Coverage	29.01
chr7R	5961622	5961676	.	-	PGSB	exon	.	ID=SECCE7Rv1G0455250.1.exon.1;Parent=SECCE7Rv1G0455250.1	SECCE7Rv1G0455250.1	463	present	Chromosome	lo7-cs_q30_rye_filter	SECCE7Rv1G0455250.1	Coverage	72.7987
chr7R	5971383	5971934	.	+	PGSB	exon	.	ID=SECCE7Rv1G0455260.1.exon.1;Parent=SECCE7Rv1G0455260.1	SECCE7Rv1G0455260.1	0	absent	Chromosome	lo7-cs_q30_rye_filter	SECCE7Rv1G0455260.1	Coverage	0
chr7R	6096990	6098559	.	-	PGSB	exon	.	ID=SECCE7Rv1G0455270.1.exon.1;Parent=SECCE7Rv1G0455270.1	SECCE7Rv1G0455270.1	589	present	Chromosome	lo7-cs_q30_rye_filter	SECCE7Rv1G0455270.1	Coverage	37.5398
chr7R	6107765	6108455	.	-	PGSB	exon	.	ID=SECCE7Rv1G0455280.1.exon.1;Parent=SECCE7Rv1G0455280.1	SECCE7Rv1G0455280.1	944	present	Chromosome	lo7-cs_q30_rye_filter	SECCE7Rv1G0455280.1	Coverage	83.9111
chr7R	6125676	6126497	.	-	PGSB	exon	.	ID=SECCE7Rv1G0455290.1.exon.1;Parent=SECCE7Rv1G0455290.1	SECCE7Rv1G0455290.1	1142	present	Chromosome	lo7-cs_q30_rye_filter	SECCE7Rv1G0455290.1	Coverage	92.8455
chr7R	6140408	6141521	.	+	PGSB	exon	.	ID=SECCE7Rv1G0455300.1.exon.1;Parent=SECCE7Rv1G0455300.1	SECCE7Rv1G0455300.1	107	absent	Chromosome	lo7-cs_q30_rye_filter	SECCE7Rv1G0455300.1	Coverage	2.06643
chr7R	6162144	6162420	.	-	PGSB	exon	.	ID=SECCE7Rv1G0455310.1.exon.1;Parent=SECCE7Rv1G0455310.1	SECCE7Rv1G0455310.1	360	present	Chromosome	lo7-cs_q30_rye_filter	SECCE7Rv1G0455310.1	Coverage	31.3316
chr7R	6190505	6190973	.	+	PGSB	exon	.	ID=SECCE7Rv1G0455320.1.exon.1;Parent=SECCE7Rv1G0455320.1	SECCE7Rv1G0455320.1	770	present	Chromosome	lo7-cs_q30_rye_filter	SECCE7Rv1G0455320.1	Coverage	75.0487
chr7R	6220888	6221225	.	+	PGSB	exon	.	ID=SECCE7Rv1G0455330.1.exon.1;Parent=SECCE7Rv1G0455330.1	SECCE7Rv1G0455330.1	425	present	Chromosome	lo7-cs_q30_rye_filter	SECCE7Rv1G0455330.1	Coverage	95.7207
chr7R	6227836	6228490	.	-	PGSB	exon	.	ID=SECCE7Rv1G0455340.1.exon.1;Parent=SECCE7Rv1G0455340.1	SECCE7Rv1G0455340.1	0	absent	Chromosome	lo7-cs_q30_rye_filter	SECCE7Rv1G0455340.1	Coverage	0
chr7R	6228493	6229156	.	-	PGSB	exon	.	ID=SECCE7Rv1G0455350.1.exon.1;Parent=SECCE7Rv1G0455350.1	SECCE7Rv1G0455350.1	0	absent	Chromosome	lo7-cs_q30_rye_filter	SECCE7Rv1G0455350.1	Coverage	0
chr7R	6240447	6240705	.	-	PGSB	exon	.	ID=SECCE7Rv1G0455360.1.exon.1;Parent=SECCE7Rv1G0455360.1	SECCE7Rv1G0455360.1	0	absent	Chromosome	lo7-cs_q30_rye_filter	SECCE7Rv1G0455360.1	Coverage	0
chr7R	6266079	6266817	.	+	PGSB	exon	.	ID=SECCE7Rv1G0455370.1.exon.1;Parent=SECCE7Rv1G0455370.1	SECCE7Rv1G0455370.1	0	absent	Chromosome	lo7-cs_q30_rye_filter	SECCE7Rv1G0455370.1	Coverage	0
chr7R	6317367	6318156	.	+	PGSB	exon	.	ID=SECCE7Rv1G0455380.1.exon.1;Parent=SECCE7Rv1G0455380.1	SECCE7Rv1G0455380.1	0	absent	Chromosome	lo7-cs_q30_rye_filter	SECCE7Rv1G0455380.1	Coverage	0
chr7R	6319696	6319960	.	-	PGSB	exon	.	ID=SECCE7Rv1G0455390.1.exon.1;Parent=SECCE7Rv1G0455390.1	SECCE7Rv1G0455390.1	1636	present	Chromosome	lo7-cs_q30_rye_filter	SECCE7Rv1G0455390.1	Coverage	74.601
chr7R	6336890	6337483	.	-	PGSB	exon	.	ID=SECCE7Rv1G0455400.1.exon.1;Parent=SECCE7Rv1G0455400.1	SECCE7Rv1G0455400.1	3411	present	Chromosome	lo7-cs_q30_rye_filter	SECCE7Rv1G0455400.1	Coverage	60.1587
chr7R	6354725	6355022	.	-	PGSB	exon	.	ID=SECCE7Rv1G0455410.1.exon.1;Parent=SECCE7Rv1G0455410.1	SECCE7Rv1G0455410.1	1243	present	Chromosome	lo7-cs_q30_rye_filter	SECCE7Rv1G0455410.1	Coverage	74.7894
chr7R	6408960	6409635	.	+	PGSB	exon	.	ID=SECCE7Rv1G0455420.1.exon.1;Parent=SECCE7Rv1G0455420.1	SECCE7Rv1G0455420.1	387	present	Chromosome	lo7-cs_q30_rye_filter	SECCE7Rv1G0455420.1	Coverage	57.3333
chr7R	6411237	6411240	.	+	PGSB	exon	.	ID=SECCE7Rv1G0455430.1.exon.1;Parent=SECCE7Rv1G0455430.1	SECCE7Rv1G0455430.1	291	present	Chromosome	lo7-cs_q30_rye_filter	SECCE7Rv1G0455430.1	Coverage	100
chr7R	6412783	6413071	.	-	PGSB	exon	.	ID=SECCE7Rv1G0455440.1.exon.1;Parent=SECCE7Rv1G0455440.1	SECCE7Rv1G0455440.1	1313	present	Chromosome	lo7-cs_q30_rye_filter	SECCE7Rv1G0455440.1	Coverage	74.1808
chr7R	6418588	6418757	.	+	PGSB	exon	.	ID=SECCE7Rv1G0455450.1.exon.1;Parent=SECCE7Rv1G0455450.1	SECCE7Rv1G0455450.1	489	present	Chromosome	lo7-cs_q30_rye_filter	SECCE7Rv1G0455450.1	Coverage	100
chr7R	6422697	6422750	.	-	PGSB	exon	.	ID=SECCE7Rv1G0455460.1.exon.1;Parent=SECCE7Rv1G0455460.1	SECCE7Rv1G0455460.1	1046	present	Chromosome	lo7-cs_q30_rye_filter	SECCE7Rv1G0455460.1	Coverage	97.6657
chr7R	6552759	6552809	.	-	PGSB	exon	.	ID=SECCE7Rv1G0455470.1.exon.1;Parent=SECCE7Rv1G0455470.1	SECCE7Rv1G0455470.1	552	present	Chromosome	lo7-cs_q30_rye_filter	SECCE7Rv1G0455470.1	Coverage	100
chr7R	7701092	7702263	.	-	PGSB	exon	.	ID=SECCE7Rv1G0455480.1.exon.1;Parent=SECCE7Rv1G0455480.1	SECCE7Rv1G0455480.1	0	absent	Chromosome	lo7-cs_q30_rye_filter	SECCE7Rv1G0455480.1	Coverage	0
chr7R	7708815	7709193	.	-	PGSB	exon	.	ID=SECCE7Rv1G0455490.1.exon.1;Parent=SECCE7Rv1G0455490.1	SECCE7Rv1G0455490.1	0	absent	Chromosome	lo7-cs_q30_rye_filter	SECCE7Rv1G0455490.1	Coverage	0
chr7R	7771430	7772131	.	+	PGSB	exon	.	ID=SECCE7Rv1G0455500.1.exon.1;Parent=SECCE7Rv1G0455500.1	SECCE7Rv1G0455500.1	76	present	Chromosome	lo7-cs_q30_rye_filter	SECCE7Rv1G0455500.1	Coverage	5.12821
chr7R	7775095	7775197	.	+	PGSB	exon	.	ID=SECCE7Rv1G0455510.1.exon.1;Parent=SECCE7Rv1G0455510.1	SECCE7Rv1G0455510.1	283	present	Chromosome	lo7-cs_q30_rye_filter	SECCE7Rv1G0455510.1	Coverage	26.7233
chr7R	7816366	7817193	.	+	PGSB	exon	.	ID=SECCE7Rv1G0455520.1.exon.1;Parent=SECCE7Rv1G0455520.1	SECCE7Rv1G0455520.1	799	present	Chromosome	lo7-cs_q30_rye_filter	SECCE7Rv1G0455520.1	Coverage	28.1536
chr7R	7835299	7835797	.	-	PGSB	exon	.	ID=SECCE7Rv1G0455530.1.exon.1;Parent=SECCE7Rv1G0455530.1	SECCE7Rv1G0455530.1	0	absent	Chromosome	lo7-cs_q30_rye_filter	SECCE7Rv1G0455530.1	Coverage	0
chr7R	7837132	7837515	.	-	PGSB	exon	.	ID=SECCE7Rv1G0455540.1.exon.1;Parent=SECCE7Rv1G0455540.1	SECCE7Rv1G0455540.1	0	absent	Chromosome	lo7-cs_q30_rye_filter	SECCE7Rv1G0455540.1	Coverage	0
chr7R	7856692	7857516	.	+	PGSB	exon	.	ID=SECCE7Rv1G0455550.1.exon.1;Parent=SECCE7Rv1G0455550.1	SECCE7Rv1G0455550.1	0	absent	Chromosome	lo7-cs_q30_rye_filter	SECCE7Rv1G0455550.1	Coverage	0
chr7R	7874112	7874930	.	+	PGSB	exon	.	ID=SECCE7Rv1G0455560.1.exon.1;Parent=SECCE7Rv1G0455560.1	SECCE7Rv1G0455560.1	0	absent	Chromosome	lo7-cs_q30_rye_filter	SECCE7Rv1G0455560.1	Coverage	0
chr7R	7880712	7881539	.	+	PGSB	exon	.	ID=SECCE7Rv1G0455570.1.exon.1;Parent=SECCE7Rv1G0455570.1	SECCE7Rv1G0455570.1	1421	present	Chromosome	lo7-cs_q30_rye_filter	SECCE7Rv1G0455570.1	Coverage	49.7027
chr7R	7886382	7886726	.	-	PGSB	exon	.	ID=SECCE7Rv1G0455580.1.exon.1;Parent=SECCE7Rv1G0455580.1	SECCE7Rv1G0455580.1	0	absent	Chromosome	lo7-cs_q30_rye_filter	SECCE7Rv1G0455580.1	Coverage	0
chr7R	7897749	7898126	.	-	PGSB	exon	.	ID=SECCE7Rv1G0455590.1.exon.1;Parent=SECCE7Rv1G0455590.1	SECCE7Rv1G0455590.1	1036	present	Chromosome	lo7-cs_q30_rye_filter	SECCE7Rv1G0455590.1	Coverage	71.7949
chr7R	7899893	7900907	.	-	PGSB	exon	.	ID=SECCE7Rv1G0455600.1.exon.1;Parent=SECCE7Rv1G0455600.1	SECCE7Rv1G0455600.1	915	present	Chromosome	lo7-cs_q30_rye_filter	SECCE7Rv1G0455600.1	Coverage	90.2367
chr7R	7942748	7943039	.	-	PGSB	exon	.	ID=SECCE7Rv1G0455610.1.exon.1;Parent=SECCE7Rv1G0455610.1	SECCE7Rv1G0455610.1	0	absent	Chromosome	lo7-cs_q30_rye_filter	SECCE7Rv1G0455610.1	Coverage	0
chr7R	7948771	7949118	.	-	PGSB	exon	.	ID=SECCE7Rv1G0455620.1.exon.1;Parent=SECCE7Rv1G0455620.1	SECCE7Rv1G0455620.1	150	absent	Chromosome	lo7-cs_q30_rye_filter	SECCE7Rv1G0455620.1	Coverage	4.52489
chr7R	7960246	7962157	.	-	PGSB	exon	.	ID=SECCE7Rv1G0455630.1.exon.1;Parent=SECCE7Rv1G0455630.1	SECCE7Rv1G0455630.1	150	present	Chromosome	lo7-cs_q30_rye_filter	SECCE7Rv1G0455630.1	Coverage	7.84929
chr7R	7970849	7971023	.	+	PGSB	exon	.	ID=SECCE7Rv1G0455640.1.exon.1;Parent=SECCE7Rv1G0455640.1	SECCE7Rv1G0455640.1	5	absent	Chromosome	lo7-cs_q30_rye_filter	SECCE7Rv1G0455640.1	Coverage	0.401606
chr7R	7993578	7993761	.	+	PGSB	exon	.	ID=SECCE7Rv1G0455650.1.exon.1;Parent=SECCE7Rv1G0455650.1	SECCE7Rv1G0455650.1	0	absent	Chromosome	lo7-cs_q30_rye_filter	SECCE7Rv1G0455650.1	Coverage	0
chr7R	8001454	8001555	.	-	PGSB	exon	.	ID=SECCE7Rv1G0455660.1.exon.1;Parent=SECCE7Rv1G0455660.1	SECCE7Rv1G0455660.1	0	absent	Chromosome	lo7-cs_q30_rye_filter	SECCE7Rv1G0455660.1	Coverage	0
chr7R	8028902	8029725	.	+	PGSB	exon	.	ID=SECCE7Rv1G0455670.1.exon.1;Parent=SECCE7Rv1G0455670.1	SECCE7Rv1G0455670.1	0	absent	Chromosome	lo7-cs_q30_rye_filter	SECCE7Rv1G0455670.1	Coverage	0
chr7R	8034637	8034981	.	-	PGSB	exon	.	ID=SECCE7Rv1G0455680.1.exon.1;Parent=SECCE7Rv1G0455680.1	SECCE7Rv1G0455680.1	568	present	Chromosome	lo7-cs_q30_rye_filter	SECCE7Rv1G0455680.1	Coverage	17.1498
chr7R	8049053	8049430	.	-	PGSB	exon	.	ID=SECCE7Rv1G0455690.1.exon.1;Parent=SECCE7Rv1G0455690.1	SECCE7Rv1G0455690.1	149	absent	Chromosome	lo7-cs_q30_rye_filter	SECCE7Rv1G0455690.1	Coverage	4.52338
chr7R	8085730	8085853	.	+	PGSB	exon	.	ID=SECCE7Rv1G0455700.1.exon.1;Parent=SECCE7Rv1G0455700.1	SECCE7Rv1G0455700.1	139	present	Chromosome	lo7-cs_q30_rye_filter	SECCE7Rv1G0455700.1	Coverage	11.6415
chr7R	8125143	8125520	.	-	PGSB	exon	.	ID=SECCE7Rv1G0455710.1.exon.1;Parent=SECCE7Rv1G0455710.1	SECCE7Rv1G0455710.1	0	absent	Chromosome	lo7-cs_q30_rye_filter	SECCE7Rv1G0455710.1	Coverage	0
chr7R	8136453	8136624	.	+	PGSB	exon	.	ID=SECCE7Rv1G0455720.1.exon.1;Parent=SECCE7Rv1G0455720.1	SECCE7Rv1G0455720.1	0	absent	Chromosome	lo7-cs_q30_rye_filter	SECCE7Rv1G0455720.1	Coverage	0
chr7R	8174593	8174661	.	+	PGSB	exon	.	ID=SECCE7Rv1G0455730.1.exon.1;Parent=SECCE7Rv1G0455730.1	SECCE7Rv1G0455730.1	328	present	Chromosome	lo7-cs_q30_rye_filter	SECCE7Rv1G0455730.1	Coverage	47.3304
chr7R	8182096	8182194	.	-	PGSB	exon	.	ID=SECCE7Rv1G0455740.1.exon.1;Parent=SECCE7Rv1G0455740.1	SECCE7Rv1G0455740.1	186	present	Chromosome	lo7-cs_q30_rye_filter	SECCE7Rv1G0455740.1	Coverage	12.9436
chr7R	8187641	8188412	.	-	PGSB	exon	.	ID=SECCE7Rv1G0455750.1.exon.1;Parent=SECCE7Rv1G0455750.1	SECCE7Rv1G0455750.1	0	absent	Chromosome	lo7-cs_q30_rye_filter	SECCE7Rv1G0455750.1	Coverage	0
chr7R	8196017	8196224	.	+	PGSB	exon	.	ID=SECCE7Rv1G0455760.1.exon.1;Parent=SECCE7Rv1G0455760.1	SECCE7Rv1G0455760.1	486	present	Chromosome	lo7-cs_q30_rye_filter	SECCE7Rv1G0455760.1	Coverage	30.2804
chr7R	8206570	8206586	.	+	PGSB	exon	.	ID=SECCE7Rv1G0455770.1.exon.1;Parent=SECCE7Rv1G0455770.1	SECCE7Rv1G0455770.1	1168	present	Chromosome	lo7-cs_q30_rye_filter	SECCE7Rv1G0455770.1	Coverage	98.3165
chr7R	8213164	8214700	.	+	PGSB	exon	.	ID=SECCE7Rv1G0455780.1.exon.1;Parent=SECCE7Rv1G0455780.1	SECCE7Rv1G0455780.1	398	present	Chromosome	lo7-cs_q30_rye_filter	SECCE7Rv1G0455780.1	Coverage	25.9115
chr7R	8217364	8219251	.	+	PGSB	exon	.	ID=SECCE7Rv1G0455790.1.exon.1;Parent=SECCE7Rv1G0455790.1	SECCE7Rv1G0455790.1	0	absent	Chromosome	lo7-cs_q30_rye_filter	SECCE7Rv1G0455790.1	Coverage	0
chr7R	8219400	8219994	.	+	PGSB	exon	.	ID=SECCE7Rv1G0455800.1.exon.1;Parent=SECCE7Rv1G0455800.1	SECCE7Rv1G0455800.1	123	present	Chromosome	lo7-cs_q30_rye_filter	SECCE7Rv1G0455800.1	Coverage	12.7329
chr7R	8221905	8223285	.	+	PGSB	exon	.	ID=SECCE7Rv1G0455810.1.exon.1;Parent=SECCE7Rv1G0455810.1	SECCE7Rv1G0455810.1	516	present	Chromosome	lo7-cs_q30_rye_filter	SECCE7Rv1G0455810.1	Coverage	37.3913
chr7R	8241934	8243164	.	+	PGSB	exon	.	ID=SECCE7Rv1G0455820.1.exon.1;Parent=SECCE7Rv1G0455820.1	SECCE7Rv1G0455820.1	791	present	Chromosome	lo7-cs_q30_rye_filter	SECCE7Rv1G0455820.1	Coverage	64.3089
chr7R	8280639	8281002	.	-	PGSB	exon	.	ID=SECCE7Rv1G0455830.1.exon.1;Parent=SECCE7Rv1G0455830.1	SECCE7Rv1G0455830.1	0	absent	Chromosome	lo7-cs_q30_rye_filter	SECCE7Rv1G0455830.1	Coverage	0
chr7R	8293068	8293215	.	-	PGSB	exon	.	ID=SECCE7Rv1G0455840.1.exon.1;Parent=SECCE7Rv1G0455840.1	SECCE7Rv1G0455840.1	399	present	Chromosome	lo7-cs_q30_rye_filter	SECCE7Rv1G0455840.1	Coverage	73.0769
chr7R	8298616	8298841	.	-	PGSB	exon	.	ID=SECCE7Rv1G0455850.1.exon.1;Parent=SECCE7Rv1G0455850.1	SECCE7Rv1G0455850.1	1611	present	Chromosome	lo7-cs_q30_rye_filter	SECCE7Rv1G0455850.1	Coverage	100
chr7R	8307073	8311106	.	-	PGSB	exon	.	ID=SECCE7Rv1G0455860.1.exon.1;Parent=SECCE7Rv1G0455860.1	SECCE7Rv1G0455860.1	4500	present	Chromosome	lo7-cs_q30_rye_filter	SECCE7Rv1G0455860.1	Coverage	89.982
chr7R	8586585	8587174	.	-	PGSB	exon	.	ID=SECCE7Rv1G0455870.1.exon.1;Parent=SECCE7Rv1G0455870.1	SECCE7Rv1G0455870.1	0	absent	Chromosome	lo7-cs_q30_rye_filter	SECCE7Rv1G0455870.1	Coverage	0
chr7R	8587434	8587626	.	-	PGSB	exon	.	ID=SECCE7Rv1G0455880.1.exon.1;Parent=SECCE7Rv1G0455880.1	SECCE7Rv1G0455880.1	0	absent	Chromosome	lo7-cs_q30_rye_filter	SECCE7Rv1G0455880.1	Coverage	0
chr7R	8595692	8596556	.	-	PGSB	exon	.	ID=SECCE7Rv1G0455890.1.exon.1;Parent=SECCE7Rv1G0455890.1	SECCE7Rv1G0455890.1	864	present	Chromosome	lo7-cs_q30_rye_filter	SECCE7Rv1G0455890.1	Coverage	100
chr7R	8648640	8648737	.	+	PGSB	exon	.	ID=SECCE7Rv1G0455900.1.exon.1;Parent=SECCE7Rv1G0455900.1	SECCE7Rv1G0455900.1	113	present	Chromosome	lo7-cs_q30_rye_filter	SECCE7Rv1G0455900.1	Coverage	34.2424
chr7R	8649822	8649920	.	-	PGSB	exon	.	ID=SECCE7Rv1G0455910.1.exon.1;Parent=SECCE7Rv1G0455910.1	SECCE7Rv1G0455910.1	1028	present	Chromosome	lo7-cs_q30_rye_filter	SECCE7Rv1G0455910.1	Coverage	70.3628
chr7R	8659368	8659374	.	-	PGSB	exon	.	ID=SECCE7Rv1G0455920.1.exon.1;Parent=SECCE7Rv1G0455920.1	SECCE7Rv1G0455920.1	795	present	Chromosome	lo7-cs_q30_rye_filter	SECCE7Rv1G0455920.1	Coverage	92.6573
chr7R	8695846	8696575	.	-	PGSB	exon	.	ID=SECCE7Rv1G0455930.1.exon.1;Parent=SECCE7Rv1G0455930.1	SECCE7Rv1G0455930.1	0	absent	Chromosome	lo7-cs_q30_rye_filter	SECCE7Rv1G0455930.1	Coverage	0
chr7R	8706295	8706661	.	-	PGSB	exon	.	ID=SECCE7Rv1G0455940.1.exon.1;Parent=SECCE7Rv1G0455940.1	SECCE7Rv1G0455940.1	0	absent	Chromosome	lo7-cs_q30_rye_filter	SECCE7Rv1G0455940.1	Coverage	0
chr7R	8711397	8711479	.	+	PGSB	exon	.	ID=SECCE7Rv1G0455950.1.exon.1;Parent=SECCE7Rv1G0455950.1	SECCE7Rv1G0455950.1	123	present	Chromosome	lo7-cs_q30_rye_filter	SECCE7Rv1G0455950.1	Coverage	24.2604
chr7R	8715502	8715535	.	+	PGSB	exon	.	ID=SECCE7Rv1G0455960.1.exon.1;Parent=SECCE7Rv1G0455960.1	SECCE7Rv1G0455960.1	258	present	Chromosome	lo7-cs_q30_rye_filter	SECCE7Rv1G0455960.1	Coverage	33.2046
chr7R	8798262	8798459	.	+	PGSB	exon	.	ID=SECCE7Rv1G0455970.1.exon.1;Parent=SECCE7Rv1G0455970.1	SECCE7Rv1G0455970.1	0	absent	Chromosome	lo7-cs_q30_rye_filter	SECCE7Rv1G0455970.1	Coverage	0
chr7R	8857007	8857129	.	-	PGSB	exon	.	ID=SECCE7Rv1G0455980.1.exon.1;Parent=SECCE7Rv1G0455980.1	SECCE7Rv1G0455980.1	543	present	Chromosome	lo7-cs_q30_rye_filter	SECCE7Rv1G0455980.1	Coverage	55.6923
chr7R	9048095	9049070	.	-	PGSB	exon	.	ID=SECCE7Rv1G0455990.1.exon.1;Parent=SECCE7Rv1G0455990.1	SECCE7Rv1G0455990.1	0	absent	Chromosome	lo7-cs_q30_rye_filter	SECCE7Rv1G0455990.1	Coverage	0
chr7R	9163291	9164266	.	-	PGSB	exon	.	ID=SECCE7Rv1G0456000.1.exon.1;Parent=SECCE7Rv1G0456000.1	SECCE7Rv1G0456000.1	141	present	Chromosome	lo7-cs_q30_rye_filter	SECCE7Rv1G0456000.1	Coverage	14.4615
chr7R	9190567	9190729	.	+	PGSB	exon	.	ID=SECCE7Rv1G0456010.1.exon.1;Parent=SECCE7Rv1G0456010.1	SECCE7Rv1G0456010.1	71	present	Chromosome	lo7-cs_q30_rye_filter	SECCE7Rv1G0456010.1	Coverage	14.9789
chr7R	9319490	9320633	.	-	PGSB	exon	.	ID=SECCE7Rv1G0456020.1.exon.1;Parent=SECCE7Rv1G0456020.1	SECCE7Rv1G0456020.1	0	absent	Chromosome	lo7-cs_q30_rye_filter	SECCE7Rv1G0456020.1	Coverage	0
chr7R	9323435	9323438	.	+	PGSB	exon	.	ID=SECCE7Rv1G0456030.1.exon.1;Parent=SECCE7Rv1G0456030.1	SECCE7Rv1G0456030.1	351	present	Chromosome	lo7-cs_q30_rye_filter	SECCE7Rv1G0456030.1	Coverage	26.3514
chr7R	9339824	9340625	.	+	PGSB	exon	.	ID=SECCE7Rv1G0456040.1.exon.1;Parent=SECCE7Rv1G0456040.1	SECCE7Rv1G0456040.1	0	absent	Chromosome	lo7-cs_q30_rye_filter	SECCE7Rv1G0456040.1	Coverage	0
chr7R	9343758	9344559	.	+	PGSB	exon	.	ID=SECCE7Rv1G0456050.1.exon.1;Parent=SECCE7Rv1G0456050.1	SECCE7Rv1G0456050.1	0	absent	Chromosome	lo7-cs_q30_rye_filter	SECCE7Rv1G0456050.1	Coverage	0
chr7R	9346630	9347001	.	-	PGSB	exon	.	ID=SECCE7Rv1G0456060.1.exon.1;Parent=SECCE7Rv1G0456060.1	SECCE7Rv1G0456060.1	0	absent	Chromosome	lo7-cs_q30_rye_filter	SECCE7Rv1G0456060.1	Coverage	0
chr7R	9348029	9348653	.	-	PGSB	exon	.	ID=SECCE7Rv1G0456070.1.exon.1;Parent=SECCE7Rv1G0456070.1	SECCE7Rv1G0456070.1	0	absent	Chromosome	lo7-cs_q30_rye_filter	SECCE7Rv1G0456070.1	Coverage	0
chr7R	9351882	9352881	.	-	PGSB	exon	.	ID=SECCE7Rv1G0456080.1.exon.1;Parent=SECCE7Rv1G0456080.1	SECCE7Rv1G0456080.1	0	absent	Chromosome	lo7-cs_q30_rye_filter	SECCE7Rv1G0456080.1	Coverage	0
chr7R	9363670	9364099	.	-	PGSB	exon	.	ID=SECCE7Rv1G0456090.1.exon.1;Parent=SECCE7Rv1G0456090.1	SECCE7Rv1G0456090.1	0	absent	Chromosome	lo7-cs_q30_rye_filter	SECCE7Rv1G0456090.1	Coverage	0
chr7R	9377966	9378269	.	+	PGSB	exon	.	ID=SECCE7Rv1G0456100.1.exon.1;Parent=SECCE7Rv1G0456100.1	SECCE7Rv1G0456100.1	0	absent	Chromosome	lo7-cs_q30_rye_filter	SECCE7Rv1G0456100.1	Coverage	0
chr7R	9406397	9407198	.	+	PGSB	exon	.	ID=SECCE7Rv1G0456110.1.exon.1;Parent=SECCE7Rv1G0456110.1	SECCE7Rv1G0456110.1	22	absent	Chromosome	lo7-cs_q30_rye_filter	SECCE7Rv1G0456110.1	Coverage	1.92982
chr7R	9409577	9409963	.	-	PGSB	exon	.	ID=SECCE7Rv1G0456120.1.exon.1;Parent=SECCE7Rv1G0456120.1	SECCE7Rv1G0456120.1	0	absent	Chromosome	lo7-cs_q30_rye_filter	SECCE7Rv1G0456120.1	Coverage	0
chr7R	9420067	9420205	.	+	PGSB	exon	.	ID=SECCE7Rv1G0456130.1.exon.1;Parent=SECCE7Rv1G0456130.1	SECCE7Rv1G0456130.1	0	absent	Chromosome	lo7-cs_q30_rye_filter	SECCE7Rv1G0456130.1	Coverage	0
chr7R	9427563	9427926	.	-	PGSB	exon	.	ID=SECCE7Rv1G0456140.1.exon.1;Parent=SECCE7Rv1G0456140.1	SECCE7Rv1G0456140.1	363	present	Chromosome	lo7-cs_q30_rye_filter	SECCE7Rv1G0456140.1	Coverage	100
chr7R	9520855	9520911	.	-	PGSB	exon	.	ID=SECCE7Rv1G0456150.1.exon.1;Parent=SECCE7Rv1G0456150.1	SECCE7Rv1G0456150.1	594	present	Chromosome	lo7-cs_q30_rye_filter	SECCE7Rv1G0456150.1	Coverage	100
chr7R	9527184	9527366	.	+	PGSB	exon	.	ID=SECCE7Rv1G0456160.1.exon.1;Parent=SECCE7Rv1G0456160.1	SECCE7Rv1G0456160.1	1344	present	Chromosome	lo7-cs_q30_rye_filter	SECCE7Rv1G0456160.1	Coverage	99.3348
chr7R	9557777	9558002	.	+	PGSB	exon	.	ID=SECCE7Rv1G0456170.1.exon.1;Parent=SECCE7Rv1G0456170.1	SECCE7Rv1G0456170.1	225	present	Chromosome	lo7-cs_q30_rye_filter	SECCE7Rv1G0456170.1	Coverage	100
chr7R	9581577	9582642	.	-	PGSB	exon	.	ID=SECCE7Rv1G0456180.1.exon.1;Parent=SECCE7Rv1G0456180.1	SECCE7Rv1G0456180.1	1065	present	Chromosome	lo7-cs_q30_rye_filter	SECCE7Rv1G0456180.1	Coverage	100
chr7R	9590650	9590653	.	+	PGSB	exon	.	ID=SECCE7Rv1G0456190.1.exon.1;Parent=SECCE7Rv1G0456190.1	SECCE7Rv1G0456190.1	1155	present	Chromosome	lo7-cs_q30_rye_filter	SECCE7Rv1G0456190.1	Coverage	100
chr7R	9602043	9602098	.	+	PGSB	exon	.	ID=SECCE7Rv1G0456200.1.exon.1;Parent=SECCE7Rv1G0456200.1	SECCE7Rv1G0456200.1	255	present	Chromosome	lo7-cs_q30_rye_filter	SECCE7Rv1G0456200.1	Coverage	100
chr7R	9619121	9620414	.	-	PGSB	exon	.	ID=SECCE7Rv1G0456210.1.exon.1;Parent=SECCE7Rv1G0456210.1	SECCE7Rv1G0456210.1	1293	present	Chromosome	lo7-cs_q30_rye_filter	SECCE7Rv1G0456210.1	Coverage	100
chr7R	9869523	9869900	.	-	PGSB	exon	.	ID=SECCE7Rv1G0456220.1.exon.1;Parent=SECCE7Rv1G0456220.1	SECCE7Rv1G0456220.1	798	present	Chromosome	lo7-cs_q30_rye_filter	SECCE7Rv1G0456220.1	Coverage	100
chr7R	10048538	10048913	.	+	PGSB	exon	.	ID=SECCE7Rv1G0456230.1.exon.1;Parent=SECCE7Rv1G0456230.1	SECCE7Rv1G0456230.1	0	absent	Chromosome	lo7-cs_q30_rye_filter	SECCE7Rv1G0456230.1	Coverage	0
chr7R	10057860	10058668	.	+	PGSB	exon	.	ID=SECCE7Rv1G0456240.1.exon.1;Parent=SECCE7Rv1G0456240.1	SECCE7Rv1G0456240.1	0	absent	Chromosome	lo7-cs_q30_rye_filter	SECCE7Rv1G0456240.1	Coverage	0
chr7R	10072997	10073380	.	+	PGSB	exon	.	ID=SECCE7Rv1G0456250.1.exon.1;Parent=SECCE7Rv1G0456250.1	SECCE7Rv1G0456250.1	383	present	Chromosome	lo7-cs_q30_rye_filter	SECCE7Rv1G0456250.1	Coverage	100
chr7R	10076191	10076582	.	+	PGSB	exon	.	ID=SECCE7Rv1G0456260.1.exon.1;Parent=SECCE7Rv1G0456260.1	SECCE7Rv1G0456260.1	391	present	Chromosome	lo7-cs_q30_rye_filter	SECCE7Rv1G0456260.1	Coverage	100
chr7R	10076786	10077102	.	+	PGSB	exon	.	ID=SECCE7Rv1G0456270.1.exon.1;Parent=SECCE7Rv1G0456270.1	SECCE7Rv1G0456270.1	316	present	Chromosome	lo7-cs_q30_rye_filter	SECCE7Rv1G0456270.1	Coverage	100
chr7R	10319653	10320352	.	-	PGSB	exon	.	ID=SECCE7Rv1G0456280.1.exon.1;Parent=SECCE7Rv1G0456280.1	SECCE7Rv1G0456280.1	132	present	Chromosome	lo7-cs_q30_rye_filter	SECCE7Rv1G0456280.1	Coverage	18.8841
chr7R	10358970	10359195	.	-	PGSB	exon	.	ID=SECCE7Rv1G0456290.1.exon.1;Parent=SECCE7Rv1G0456290.1	SECCE7Rv1G0456290.1	0	absent	Chromosome	lo7-cs_q30_rye_filter	SECCE7Rv1G0456290.1	Coverage	0
chr7R	10442852	10443257	.	-	PGSB	exon	.	ID=SECCE7Rv1G0456300.1.exon.1;Parent=SECCE7Rv1G0456300.1	SECCE7Rv1G0456300.1	0	absent	Chromosome	lo7-cs_q30_rye_filter	SECCE7Rv1G0456300.1	Coverage	0
chr7R	10475371	10475821	.	-	PGSB	exon	.	ID=SECCE7Rv1G0456310.1.exon.1;Parent=SECCE7Rv1G0456310.1	SECCE7Rv1G0456310.1	0	absent	Chromosome	lo7-cs_q30_rye_filter	SECCE7Rv1G0456310.1	Coverage	0
chr7R	10495449	10495609	.	-	PGSB	exon	.	ID=SECCE7Rv1G0456320.1.exon.1;Parent=SECCE7Rv1G0456320.1	SECCE7Rv1G0456320.1	862	present	Chromosome	lo7-cs_q30_rye_filter	SECCE7Rv1G0456320.1	Coverage	86.8077
chr7R	10499627	10499855	.	+	PGSB	exon	.	ID=SECCE7Rv1G0456330.1.exon.1;Parent=SECCE7Rv1G0456330.1	SECCE7Rv1G0456330.1	129	present	Chromosome	lo7-cs_q30_rye_filter	SECCE7Rv1G0456330.1	Coverage	56.5789
chr7R	10514589	10514749	.	-	PGSB	exon	.	ID=SECCE7Rv1G0456340.1.exon.1;Parent=SECCE7Rv1G0456340.1	SECCE7Rv1G0456340.1	427	present	Chromosome	lo7-cs_q30_rye_filter	SECCE7Rv1G0456340.1	Coverage	43.001
chr7R	10523947	10524382	.	+	PGSB	exon	.	ID=SECCE7Rv1G0456350.1.exon.1;Parent=SECCE7Rv1G0456350.1	SECCE7Rv1G0456350.1	0	absent	Chromosome	lo7-cs_q30_rye_filter	SECCE7Rv1G0456350.1	Coverage	0
chr7R	10532098	10532509	.	+	PGSB	exon	.	ID=SECCE7Rv1G0456360.1.exon.1;Parent=SECCE7Rv1G0456360.1	SECCE7Rv1G0456360.1	0	absent	Chromosome	lo7-cs_q30_rye_filter	SECCE7Rv1G0456360.1	Coverage	0
chr7R	10552278	10552621	.	+	PGSB	exon	.	ID=SECCE7Rv1G0456370.1.exon.1;Parent=SECCE7Rv1G0456370.1	SECCE7Rv1G0456370.1	0	absent	Chromosome	lo7-cs_q30_rye_filter	SECCE7Rv1G0456370.1	Coverage	0
chr7R	10589919	10590540	.	+	PGSB	exon	.	ID=SECCE7Rv1G0456380.1.exon.1;Parent=SECCE7Rv1G0456380.1	SECCE7Rv1G0456380.1	211	present	Chromosome	lo7-cs_q30_rye_filter	SECCE7Rv1G0456380.1	Coverage	33.9775
chr7R	10598693	10599259	.	+	PGSB	exon	.	ID=SECCE7Rv1G0456390.1.exon.1;Parent=SECCE7Rv1G0456390.1	SECCE7Rv1G0456390.1	0	absent	Chromosome	lo7-cs_q30_rye_filter	SECCE7Rv1G0456390.1	Coverage	0
chr7R	10613971	10614132	.	-	PGSB	exon	.	ID=SECCE7Rv1G0456400.1.exon.1;Parent=SECCE7Rv1G0456400.1	SECCE7Rv1G0456400.1	417	present	Chromosome	lo7-cs_q30_rye_filter	SECCE7Rv1G0456400.1	Coverage	87.9747
chr7R	10621671	10622880	.	-	PGSB	exon	.	ID=SECCE7Rv1G0456410.1.exon.1;Parent=SECCE7Rv1G0456410.1	SECCE7Rv1G0456410.1	822	present	Chromosome	lo7-cs_q30_rye_filter	SECCE7Rv1G0456410.1	Coverage	67.9901
chr7R	10635865	10636618	.	-	PGSB	exon	.	ID=SECCE7Rv1G0456420.1.exon.1;Parent=SECCE7Rv1G0456420.1	SECCE7Rv1G0456420.1	622	present	Chromosome	lo7-cs_q30_rye_filter	SECCE7Rv1G0456420.1	Coverage	82.6029
chr7R	10642312	10642443	.	-	PGSB	exon	.	ID=SECCE7Rv1G0456430.1.exon.1;Parent=SECCE7Rv1G0456430.1	SECCE7Rv1G0456430.1	348	present	Chromosome	lo7-cs_q30_rye_filter	SECCE7Rv1G0456430.1	Coverage	100
chr7R	10781079	10782258	.	+	PGSB	exon	.	ID=SECCE7Rv1G0456440.1.exon.1;Parent=SECCE7Rv1G0456440.1	SECCE7Rv1G0456440.1	1572	present	Chromosome	lo7-cs_q30_rye_filter	SECCE7Rv1G0456440.1	Coverage	100
chr7R	10904191	10904539	.	-	PGSB	exon	.	ID=SECCE7Rv1G0456450.1.exon.1;Parent=SECCE7Rv1G0456450.1	SECCE7Rv1G0456450.1	305	present	Chromosome	lo7-cs_q30_rye_filter	SECCE7Rv1G0456450.1	Coverage	25.4804
chr7R	10927254	10927578	.	-	PGSB	exon	.	ID=SECCE7Rv1G0456460.1.exon.1;Parent=SECCE7Rv1G0456460.1	SECCE7Rv1G0456460.1	324	present	Chromosome	lo7-cs_q30_rye_filter	SECCE7Rv1G0456460.1	Coverage	100
chr7R	10940185	10940710	.	-	PGSB	exon	.	ID=SECCE7Rv1G0456470.1.exon.1;Parent=SECCE7Rv1G0456470.1	SECCE7Rv1G0456470.1	525	present	Chromosome	lo7-cs_q30_rye_filter	SECCE7Rv1G0456470.1	Coverage	100
chr7R	10965080	10965112	.	-	PGSB	exon	.	ID=SECCE7Rv1G0456480.1.exon.1;Parent=SECCE7Rv1G0456480.1	SECCE7Rv1G0456480.1	1233	present	Chromosome	lo7-cs_q30_rye_filter	SECCE7Rv1G0456480.1	Coverage	100
chr7R	10974003	10974442	.	-	PGSB	exon	.	ID=SECCE7Rv1G0456490.1.exon.1;Parent=SECCE7Rv1G0456490.1	SECCE7Rv1G0456490.1	592	present	Chromosome	lo7-cs_q30_rye_filter	SECCE7Rv1G0456490.1	Coverage	53.6232
chr7R	10980359	10981560	.	+	PGSB	exon	.	ID=SECCE7Rv1G0456500.1.exon.1;Parent=SECCE7Rv1G0456500.1	SECCE7Rv1G0456500.1	1187	present	Chromosome	lo7-cs_q30_rye_filter	SECCE7Rv1G0456500.1	Coverage	97.4548
chr7R	10987317	10987352	.	-	PGSB	exon	.	ID=SECCE7Rv1G0456510.1.exon.1;Parent=SECCE7Rv1G0456510.1	SECCE7Rv1G0456510.1	1086	present	Chromosome	lo7-cs_q30_rye_filter	SECCE7Rv1G0456510.1	Coverage	100
chr7R	10993326	10993529	.	-	PGSB	exon	.	ID=SECCE7Rv1G0456520.1.exon.1;Parent=SECCE7Rv1G0456520.1	SECCE7Rv1G0456520.1	375	present	Chromosome	lo7-cs_q30_rye_filter	SECCE7Rv1G0456520.1	Coverage	100
chr7R	10997701	10997904	.	-	PGSB	exon	.	ID=SECCE7Rv1G0456530.1.exon.1;Parent=SECCE7Rv1G0456530.1	SECCE7Rv1G0456530.1	384	present	Chromosome	lo7-cs_q30_rye_filter	SECCE7Rv1G0456530.1	Coverage	100
chr7R	11002713	11003205	.	+	PGSB	exon	.	ID=SECCE7Rv1G0456540.1.exon.1;Parent=SECCE7Rv1G0456540.1	SECCE7Rv1G0456540.1	492	present	Chromosome	lo7-cs_q30_rye_filter	SECCE7Rv1G0456540.1	Coverage	100
chr7R	11019457	11019649	.	+	PGSB	exon	.	ID=SECCE7Rv1G0456550.1.exon.1;Parent=SECCE7Rv1G0456550.1	SECCE7Rv1G0456550.1	192	present	Chromosome	lo7-cs_q30_rye_filter	SECCE7Rv1G0456550.1	Coverage	100
chr7R	11020889	11020973	.	+	PGSB	exon	.	ID=SECCE7Rv1G0456560.1.exon.1;Parent=SECCE7Rv1G0456560.1	SECCE7Rv1G0456560.1	696	present	Chromosome	lo7-cs_q30_rye_filter	SECCE7Rv1G0456560.1	Coverage	100
chr7R	11027059	11027176	.	+	PGSB	exon	.	ID=SECCE7Rv1G0456570.1.exon.1;Parent=SECCE7Rv1G0456570.1	SECCE7Rv1G0456570.1	765	present	Chromosome	lo7-cs_q30_rye_filter	SECCE7Rv1G0456570.1	Coverage	100
chr7R	11050056	11050317	.	+	PGSB	exon	.	ID=SECCE7Rv1G0456580.1.exon.1;Parent=SECCE7Rv1G0456580.1	SECCE7Rv1G0456580.1	40	present	Chromosome	lo7-cs_q30_rye_filter	SECCE7Rv1G0456580.1	Coverage	15.3257
chr7R	11068135	11068362	.	+	PGSB	exon	.	ID=SECCE7Rv1G0456590.1.exon.1;Parent=SECCE7Rv1G0456590.1	SECCE7Rv1G0456590.1	0	absent	Chromosome	lo7-cs_q30_rye_filter	SECCE7Rv1G0456590.1	Coverage	0
chr7R	11094169	11094436	.	-	PGSB	exon	.	ID=SECCE7Rv1G0456600.1.exon.1;Parent=SECCE7Rv1G0456600.1	SECCE7Rv1G0456600.1	0	absent	Chromosome	lo7-cs_q30_rye_filter	SECCE7Rv1G0456600.1	Coverage	0
chr7R	11123593	11123710	.	+	PGSB	exon	.	ID=SECCE7Rv1G0456610.1.exon.1;Parent=SECCE7Rv1G0456610.1	SECCE7Rv1G0456610.1	612	present	Chromosome	lo7-cs_q30_rye_filter	SECCE7Rv1G0456610.1	Coverage	83.9506
chr7R	11141805	11141922	.	+	PGSB	exon	.	ID=SECCE7Rv1G0456620.1.exon.1;Parent=SECCE7Rv1G0456620.1	SECCE7Rv1G0456620.1	729	present	Chromosome	lo7-cs_q30_rye_filter	SECCE7Rv1G0456620.1	Coverage	100
chr7R	11148860	11149008	.	+	PGSB	exon	.	ID=SECCE7Rv1G0456630.1.exon.1;Parent=SECCE7Rv1G0456630.1	SECCE7Rv1G0456630.1	303	present	Chromosome	lo7-cs_q30_rye_filter	SECCE7Rv1G0456630.1	Coverage	100
chr7R	11163245	11163371	.	+	PGSB	exon	.	ID=SECCE7Rv1G0456640.1.exon.1;Parent=SECCE7Rv1G0456640.1	SECCE7Rv1G0456640.1	481	present	Chromosome	lo7-cs_q30_rye_filter	SECCE7Rv1G0456640.1	Coverage	61.9048
chr7R	11188577	11188709	.	-	PGSB	exon	.	ID=SECCE7Rv1G0456650.1.exon.1;Parent=SECCE7Rv1G0456650.1	SECCE7Rv1G0456650.1	1899	present	Chromosome	lo7-cs_q30_rye_filter	SECCE7Rv1G0456650.1	Coverage	100
chr7R	11229298	11229523	.	-	PGSB	exon	.	ID=SECCE7Rv1G0456660.1.exon.1;Parent=SECCE7Rv1G0456660.1	SECCE7Rv1G0456660.1	0	absent	Chromosome	lo7-cs_q30_rye_filter	SECCE7Rv1G0456660.1	Coverage	0
chr7R	11234802	11235684	.	+	PGSB	exon	.	ID=SECCE7Rv1G0456670.1.exon.1;Parent=SECCE7Rv1G0456670.1	SECCE7Rv1G0456670.1	560	present	Chromosome	lo7-cs_q30_rye_filter	SECCE7Rv1G0456670.1	Coverage	63.4921
chr7R	11241930	11242812	.	+	PGSB	exon	.	ID=SECCE7Rv1G0456680.1.exon.1;Parent=SECCE7Rv1G0456680.1	SECCE7Rv1G0456680.1	360	present	Chromosome	lo7-cs_q30_rye_filter	SECCE7Rv1G0456680.1	Coverage	40.8163
chr7R	11270462	11271344	.	+	PGSB	exon	.	ID=SECCE7Rv1G0456690.1.exon.1;Parent=SECCE7Rv1G0456690.1	SECCE7Rv1G0456690.1	882	present	Chromosome	lo7-cs_q30_rye_filter	SECCE7Rv1G0456690.1	Coverage	100
chr7R	11277303	11277411	.	-	PGSB	exon	.	ID=SECCE7Rv1G0456700.1.exon.1;Parent=SECCE7Rv1G0456700.1	SECCE7Rv1G0456700.1	835	present	Chromosome	lo7-cs_q30_rye_filter	SECCE7Rv1G0456700.1	Coverage	96.9803
chr7R	11374028	11374253	.	+	PGSB	exon	.	ID=SECCE7Rv1G0456710.1.exon.1;Parent=SECCE7Rv1G0456710.1	SECCE7Rv1G0456710.1	662	present	Chromosome	lo7-cs_q30_rye_filter	SECCE7Rv1G0456710.1	Coverage	91.9444
chr7R	11390827	11391001	.	-	PGSB	exon	.	ID=SECCE7Rv1G0456720.1.exon.1;Parent=SECCE7Rv1G0456720.1	SECCE7Rv1G0456720.1	1407	present	Chromosome	lo7-cs_q30_rye_filter	SECCE7Rv1G0456720.1	Coverage	92.6877
chr7R	11395192	11396539	.	-	PGSB	exon	.	ID=SECCE7Rv1G0456730.1.exon.1;Parent=SECCE7Rv1G0456730.1	SECCE7Rv1G0456730.1	1253	present	Chromosome	lo7-cs_q30_rye_filter	SECCE7Rv1G0456730.1	Coverage	93.0215
chr7R	11416211	11417558	.	-	PGSB	exon	.	ID=SECCE7Rv1G0456740.1.exon.1;Parent=SECCE7Rv1G0456740.1	SECCE7Rv1G0456740.1	1293	present	Chromosome	lo7-cs_q30_rye_filter	SECCE7Rv1G0456740.1	Coverage	95.9911
chr7R	11431696	11432614	.	-	PGSB	exon	.	ID=SECCE7Rv1G0456750.1.exon.1;Parent=SECCE7Rv1G0456750.1	SECCE7Rv1G0456750.1	218	present	Chromosome	lo7-cs_q30_rye_filter	SECCE7Rv1G0456750.1	Coverage	23.7473
chr7R	12056191	12056512	.	+	PGSB	exon	.	ID=SECCE7Rv1G0456760.1.exon.1;Parent=SECCE7Rv1G0456760.1	SECCE7Rv1G0456760.1	182	present	Chromosome	lo7-cs_q30_rye_filter	SECCE7Rv1G0456760.1	Coverage	56.6978
chr7R	12755477	12755480	.	+	PGSB	exon	.	ID=SECCE7Rv1G0456770.1.exon.1;Parent=SECCE7Rv1G0456770.1	SECCE7Rv1G0456770.1	252	present	Chromosome	lo7-cs_q30_rye_filter	SECCE7Rv1G0456770.1	Coverage	49.4118
chr7R	12761705	12762073	.	-	PGSB	exon	.	ID=SECCE7Rv1G0456780.1.exon.1;Parent=SECCE7Rv1G0456780.1	SECCE7Rv1G0456780.1	613	present	Chromosome	lo7-cs_q30_rye_filter	SECCE7Rv1G0456780.1	Coverage	93.7309
chr7R	12785133	12787638	.	-	PGSB	exon	.	ID=SECCE7Rv1G0456790.1.exon.1;Parent=SECCE7Rv1G0456790.1	SECCE7Rv1G0456790.1	2228	present	Chromosome	lo7-cs_q30_rye_filter	SECCE7Rv1G0456790.1	Coverage	68.1346
chr7R	12793753	12793759	.	+	PGSB	exon	.	ID=SECCE7Rv1G0456800.1.exon.1;Parent=SECCE7Rv1G0456800.1	SECCE7Rv1G0456800.1	342	present	Chromosome	lo7-cs_q30_rye_filter	SECCE7Rv1G0456800.1	Coverage	47.6987
chr7R	12796726	12796840	.	-	PGSB	exon	.	ID=SECCE7Rv1G0456810.1.exon.1;Parent=SECCE7Rv1G0456810.1	SECCE7Rv1G0456810.1	1210	present	Chromosome	lo7-cs_q30_rye_filter	SECCE7Rv1G0456810.1	Coverage	52.7233
chr7R	12805948	12806602	.	-	PGSB	exon	.	ID=SECCE7Rv1G0456820.1.exon.1;Parent=SECCE7Rv1G0456820.1	SECCE7Rv1G0456820.1	654	present	Chromosome	lo7-cs_q30_rye_filter	SECCE7Rv1G0456820.1	Coverage	100
chr7R	13036912	13037016	.	+	PGSB	exon	.	ID=SECCE7Rv1G0456830.1.exon.1;Parent=SECCE7Rv1G0456830.1	SECCE7Rv1G0456830.1	822	present	Chromosome	lo7-cs_q30_rye_filter	SECCE7Rv1G0456830.1	Coverage	100
chr7R	13038487	13038616	.	-	PGSB	exon	.	ID=SECCE7Rv1G0456840.1.exon.1;Parent=SECCE7Rv1G0456840.1	SECCE7Rv1G0456840.1	873	present	Chromosome	lo7-cs_q30_rye_filter	SECCE7Rv1G0456840.1	Coverage	100
chr7R	13053011	13053356	.	+	PGSB	exon	.	ID=SECCE7Rv1G0456850.1.exon.1;Parent=SECCE7Rv1G0456850.1	SECCE7Rv1G0456850.1	1057	present	Chromosome	lo7-cs_q30_rye_filter	SECCE7Rv1G0456850.1	Coverage	86.1451
chr7R	13062589	13063471	.	-	PGSB	exon	.	ID=SECCE7Rv1G0456860.1.exon.1;Parent=SECCE7Rv1G0456860.1	SECCE7Rv1G0456860.1	749	present	Chromosome	lo7-cs_q30_rye_filter	SECCE7Rv1G0456860.1	Coverage	60.7461
chr7R	13067467	13067953	.	-	PGSB	exon	.	ID=SECCE7Rv1G0456870.1.exon.1;Parent=SECCE7Rv1G0456870.1	SECCE7Rv1G0456870.1	0	absent	Chromosome	lo7-cs_q30_rye_filter	SECCE7Rv1G0456870.1	Coverage	0
chr7R	13116919	13117099	.	+	PGSB	exon	.	ID=SECCE7Rv1G0456880.1.exon.1;Parent=SECCE7Rv1G0456880.1	SECCE7Rv1G0456880.1	0	absent	Chromosome	lo7-cs_q30_rye_filter	SECCE7Rv1G0456880.1	Coverage	0
chr7R	13140701	13141187	.	-	PGSB	exon	.	ID=SECCE7Rv1G0456890.1.exon.1;Parent=SECCE7Rv1G0456890.1	SECCE7Rv1G0456890.1	0	absent	Chromosome	lo7-cs_q30_rye_filter	SECCE7Rv1G0456890.1	Coverage	0
chr7R	13522760	13523105	.	+	PGSB	exon	.	ID=SECCE7Rv1G0456900.1.exon.1;Parent=SECCE7Rv1G0456900.1	SECCE7Rv1G0456900.1	572	present	Chromosome	lo7-cs_q30_rye_filter	SECCE7Rv1G0456900.1	Coverage	46.6178
chr7R	13528225	13529107	.	-	PGSB	exon	.	ID=SECCE7Rv1G0456910.1.exon.1;Parent=SECCE7Rv1G0456910.1	SECCE7Rv1G0456910.1	882	present	Chromosome	lo7-cs_q30_rye_filter	SECCE7Rv1G0456910.1	Coverage	71.8826
chr7R	13590737	13590801	.	+	PGSB	exon	.	ID=SECCE7Rv1G0456920.1.exon.1;Parent=SECCE7Rv1G0456920.1	SECCE7Rv1G0456920.1	96	present	Chromosome	lo7-cs_q30_rye_filter	SECCE7Rv1G0456920.1	Coverage	10.9215
chr7R	13594196	13594475	.	-	PGSB	exon	.	ID=SECCE7Rv1G0456930.1.exon.1;Parent=SECCE7Rv1G0456930.1	SECCE7Rv1G0456930.1	0	absent	Chromosome	lo7-cs_q30_rye_filter	SECCE7Rv1G0456930.1	Coverage	0
chr7R	13613137	13613362	.	-	PGSB	exon	.	ID=SECCE7Rv1G0456940.1.exon.1;Parent=SECCE7Rv1G0456940.1	SECCE7Rv1G0456940.1	225	present	Chromosome	lo7-cs_q30_rye_filter	SECCE7Rv1G0456940.1	Coverage	100
chr7R	13657229	13657865	.	-	PGSB	exon	.	ID=SECCE7Rv1G0456950.1.exon.1;Parent=SECCE7Rv1G0456950.1	SECCE7Rv1G0456950.1	636	present	Chromosome	lo7-cs_q30_rye_filter	SECCE7Rv1G0456950.1	Coverage	100
chr7R	13686701	13686722	.	-	PGSB	exon	.	ID=SECCE7Rv1G0456960.1.exon.1;Parent=SECCE7Rv1G0456960.1	SECCE7Rv1G0456960.1	336	present	Chromosome	lo7-cs_q30_rye_filter	SECCE7Rv1G0456960.1	Coverage	100
chr7R	13700890	13700894	.	-	PGSB	exon	.	ID=SECCE7Rv1G0456970.1.exon.1;Parent=SECCE7Rv1G0456970.1	SECCE7Rv1G0456970.1	0	absent	Chromosome	lo7-cs_q30_rye_filter	SECCE7Rv1G0456970.1	Coverage	0
chr7R	13719728	13721015	.	-	PGSB	exon	.	ID=SECCE7Rv1G0456980.1.exon.1;Parent=SECCE7Rv1G0456980.1	SECCE7Rv1G0456980.1	0	absent	Chromosome	lo7-cs_q30_rye_filter	SECCE7Rv1G0456980.1	Coverage	0
chr7R	13759052	13760339	.	-	PGSB	exon	.	ID=SECCE7Rv1G0456990.1.exon.1;Parent=SECCE7Rv1G0456990.1	SECCE7Rv1G0456990.1	0	absent	Chromosome	lo7-cs_q30_rye_filter	SECCE7Rv1G0456990.1	Coverage	0
chr7R	13760519	13761944	.	-	PGSB	exon	.	ID=SECCE7Rv1G0457000.1.exon.1;Parent=SECCE7Rv1G0457000.1	SECCE7Rv1G0457000.1	163	present	Chromosome	lo7-cs_q30_rye_filter	SECCE7Rv1G0457000.1	Coverage	11.4386
chr7R	13767836	13768055	.	-	PGSB	exon	.	ID=SECCE7Rv1G0457010.1.exon.1;Parent=SECCE7Rv1G0457010.1	SECCE7Rv1G0457010.1	1037	present	Chromosome	lo7-cs_q30_rye_filter	SECCE7Rv1G0457010.1	Coverage	82.6954
chr7R	13882429	13883227	.	+	PGSB	exon	.	ID=SECCE7Rv1G0457020.1.exon.1;Parent=SECCE7Rv1G0457020.1	SECCE7Rv1G0457020.1	0	absent	Chromosome	lo7-cs_q30_rye_filter	SECCE7Rv1G0457020.1	Coverage	0
chr7R	13883754	13883970	.	+	PGSB	exon	.	ID=SECCE7Rv1G0457030.1.exon.1;Parent=SECCE7Rv1G0457030.1	SECCE7Rv1G0457030.1	137	present	Chromosome	lo7-cs_q30_rye_filter	SECCE7Rv1G0457030.1	Coverage	63.4259
chr7R	13894859	13895018	.	+	PGSB	exon	.	ID=SECCE7Rv1G0457040.1.exon.1;Parent=SECCE7Rv1G0457040.1	SECCE7Rv1G0457040.1	0	absent	Chromosome	lo7-cs_q30_rye_filter	SECCE7Rv1G0457040.1	Coverage	0
chr7R	13907666	13908530	.	+	PGSB	exon	.	ID=SECCE7Rv1G0457050.1.exon.1;Parent=SECCE7Rv1G0457050.1	SECCE7Rv1G0457050.1	98	present	Chromosome	lo7-cs_q30_rye_filter	SECCE7Rv1G0457050.1	Coverage	6.5073
chr7R	13924247	13924886	.	-	PGSB	exon	.	ID=SECCE7Rv1G0457060.1.exon.1;Parent=SECCE7Rv1G0457060.1	SECCE7Rv1G0457060.1	1471	present	Chromosome	lo7-cs_q30_rye_filter	SECCE7Rv1G0457060.1	Coverage	89.6405
chr7R	14055097	14055706	.	-	PGSB	exon	.	ID=SECCE7Rv1G0457070.1.exon.1;Parent=SECCE7Rv1G0457070.1	SECCE7Rv1G0457070.1	0	absent	Chromosome	lo7-cs_q30_rye_filter	SECCE7Rv1G0457070.1	Coverage	0
chr7R	14086469	14086649	.	+	PGSB	exon	.	ID=SECCE7Rv1G0457080.1.exon.1;Parent=SECCE7Rv1G0457080.1	SECCE7Rv1G0457080.1	0	absent	Chromosome	lo7-cs_q30_rye_filter	SECCE7Rv1G0457080.1	Coverage	0
chr7R	14280024	14280163	.	+	PGSB	exon	.	ID=SECCE7Rv1G0457090.1.exon.1;Parent=SECCE7Rv1G0457090.1	SECCE7Rv1G0457090.1	626	present	Chromosome	lo7-cs_q30_rye_filter	SECCE7Rv1G0457090.1	Coverage	81.5104
chr7R	14297658	14299200	.	-	PGSB	exon	.	ID=SECCE7Rv1G0457100.1.exon.1;Parent=SECCE7Rv1G0457100.1	SECCE7Rv1G0457100.1	411	present	Chromosome	lo7-cs_q30_rye_filter	SECCE7Rv1G0457100.1	Coverage	26.6537
chr7R	14324497	14326102	.	+	PGSB	exon	.	ID=SECCE7Rv1G0457110.1.exon.1;Parent=SECCE7Rv1G0457110.1	SECCE7Rv1G0457110.1	1436	present	Chromosome	lo7-cs_q30_rye_filter	SECCE7Rv1G0457110.1	Coverage	89.4704
chr7R	14333965	14334605	.	-	PGSB	exon	.	ID=SECCE7Rv1G0457120.1.exon.1;Parent=SECCE7Rv1G0457120.1	SECCE7Rv1G0457120.1	575	present	Chromosome	lo7-cs_q30_rye_filter	SECCE7Rv1G0457120.1	Coverage	60.8466
chr7R	14365683	14366646	.	+	PGSB	exon	.	ID=SECCE7Rv1G0457130.1.exon.1;Parent=SECCE7Rv1G0457130.1	SECCE7Rv1G0457130.1	452	present	Chromosome	lo7-cs_q30_rye_filter	SECCE7Rv1G0457130.1	Coverage	28.2147
chr7R	14462930	14463692	.	-	PGSB	exon	.	ID=SECCE7Rv1G0457140.1.exon.1;Parent=SECCE7Rv1G0457140.1	SECCE7Rv1G0457140.1	430	present	Chromosome	lo7-cs_q30_rye_filter	SECCE7Rv1G0457140.1	Coverage	56.4304
chr7R	14468078	14470340	.	+	PGSB	exon	.	ID=SECCE7Rv1G0457150.1.exon.1;Parent=SECCE7Rv1G0457150.1	SECCE7Rv1G0457150.1	763	present	Chromosome	lo7-cs_q30_rye_filter	SECCE7Rv1G0457150.1	Coverage	33.7312
chr7R	14502155	14502705	.	-	PGSB	exon	.	ID=SECCE7Rv1G0457160.1.exon.1;Parent=SECCE7Rv1G0457160.1	SECCE7Rv1G0457160.1	0	absent	Chromosome	lo7-cs_q30_rye_filter	SECCE7Rv1G0457160.1	Coverage	0
chr7R	14505506	14506382	.	-	PGSB	exon	.	ID=SECCE7Rv1G0457170.1.exon.1;Parent=SECCE7Rv1G0457170.1	SECCE7Rv1G0457170.1	0	absent	Chromosome	lo7-cs_q30_rye_filter	SECCE7Rv1G0457170.1	Coverage	0
chr7R	14542289	14542592	.	-	PGSB	exon	.	ID=SECCE7Rv1G0457180.1.exon.1;Parent=SECCE7Rv1G0457180.1	SECCE7Rv1G0457180.1	0	absent	Chromosome	lo7-cs_q30_rye_filter	SECCE7Rv1G0457180.1	Coverage	0
chr7R	14595594	14597829	.	-	PGSB	exon	.	ID=SECCE7Rv1G0457190.1.exon.1;Parent=SECCE7Rv1G0457190.1	SECCE7Rv1G0457190.1	0	absent	Chromosome	lo7-cs_q30_rye_filter	SECCE7Rv1G0457190.1	Coverage	0
chr7R	14651993	14654207	.	+	PGSB	exon	.	ID=SECCE7Rv1G0457200.1.exon.1;Parent=SECCE7Rv1G0457200.1	SECCE7Rv1G0457200.1	453	present	Chromosome	lo7-cs_q30_rye_filter	SECCE7Rv1G0457200.1	Coverage	20.4607
chr7R	14741726	14743463	.	-	PGSB	exon	.	ID=SECCE7Rv1G0457210.1.exon.1;Parent=SECCE7Rv1G0457210.1	SECCE7Rv1G0457210.1	0	absent	Chromosome	lo7-cs_q30_rye_filter	SECCE7Rv1G0457210.1	Coverage	0
chr7R	14790466	14790976	.	+	PGSB	exon	.	ID=SECCE7Rv1G0457220.1.exon.1;Parent=SECCE7Rv1G0457220.1	SECCE7Rv1G0457220.1	510	present	Chromosome	lo7-cs_q30_rye_filter	SECCE7Rv1G0457220.1	Coverage	100
chr7R	14820615	14821125	.	+	PGSB	exon	.	ID=SECCE7Rv1G0457230.1.exon.1;Parent=SECCE7Rv1G0457230.1	SECCE7Rv1G0457230.1	470	present	Chromosome	lo7-cs_q30_rye_filter	SECCE7Rv1G0457230.1	Coverage	92.1569
chr7R	14941150	14941504	.	+	PGSB	exon	.	ID=SECCE7Rv1G0457240.1.exon.1;Parent=SECCE7Rv1G0457240.1	SECCE7Rv1G0457240.1	1674	present	Chromosome	lo7-cs_q30_rye_filter	SECCE7Rv1G0457240.1	Coverage	100
chr7R	15318364	15318478	.	+	PGSB	exon	.	ID=SECCE7Rv1G0457250.1.exon.1;Parent=SECCE7Rv1G0457250.1	SECCE7Rv1G0457250.1	114	present	Chromosome	lo7-cs_q30_rye_filter	SECCE7Rv1G0457250.1	Coverage	6.57439
chr7R	15323098	15323439	.	-	PGSB	exon	.	ID=SECCE7Rv1G0457260.1.exon.1;Parent=SECCE7Rv1G0457260.1	SECCE7Rv1G0457260.1	522	present	Chromosome	lo7-cs_q30_rye_filter	SECCE7Rv1G0457260.1	Coverage	100
chr7R	15426777	15427673	.	-	PGSB	exon	.	ID=SECCE7Rv1G0457270.1.exon.1;Parent=SECCE7Rv1G0457270.1	SECCE7Rv1G0457270.1	472	present	Chromosome	lo7-cs_q30_rye_filter	SECCE7Rv1G0457270.1	Coverage	18.8423
chr7R	15489642	15489796	.	-	PGSB	exon	.	ID=SECCE7Rv1G0457280.1.exon.1;Parent=SECCE7Rv1G0457280.1	SECCE7Rv1G0457280.1	1332	present	Chromosome	lo7-cs_q30_rye_filter	SECCE7Rv1G0457280.1	Coverage	100
chr7R	15504076	15504202	.	+	PGSB	exon	.	ID=SECCE7Rv1G0457290.1.exon.1;Parent=SECCE7Rv1G0457290.1	SECCE7Rv1G0457290.1	1870	present	Chromosome	lo7-cs_q30_rye_filter	SECCE7Rv1G0457290.1	Coverage	91.6667
chr7R	15623964	15624052	.	-	PGSB	exon	.	ID=SECCE7Rv1G0457300.1.exon.1;Parent=SECCE7Rv1G0457300.1	SECCE7Rv1G0457300.1	1514	present	Chromosome	lo7-cs_q30_rye_filter	SECCE7Rv1G0457300.1	Coverage	94.5069
chr7R	15628378	15628491	.	-	PGSB	exon	.	ID=SECCE7Rv1G0457310.1.exon.1;Parent=SECCE7Rv1G0457310.1	SECCE7Rv1G0457310.1	356	present	Chromosome	lo7-cs_q30_rye_filter	SECCE7Rv1G0457310.1	Coverage	98.0716
chr7R	15899272	15899485	.	+	PGSB	exon	.	ID=SECCE7Rv1G0457320.1.exon.1;Parent=SECCE7Rv1G0457320.1	SECCE7Rv1G0457320.1	1523	present	Chromosome	lo7-cs_q30_rye_filter	SECCE7Rv1G0457320.1	Coverage	68.0518
chr7R	15910821	15911166	.	+	PGSB	exon	.	ID=SECCE7Rv1G0457330.1.exon.1;Parent=SECCE7Rv1G0457330.1	SECCE7Rv1G0457330.1	1092	present	Chromosome	lo7-cs_q30_rye_filter	SECCE7Rv1G0457330.1	Coverage	46.1929
chr7R	16006749	16006963	.	+	PGSB	exon	.	ID=SECCE7Rv1G0457340.1.exon.1;Parent=SECCE7Rv1G0457340.1	SECCE7Rv1G0457340.1	1961	present	Chromosome	lo7-cs_q30_rye_filter	SECCE7Rv1G0457340.1	Coverage	99.0404
chr7R	16096724	16096842	.	-	PGSB	exon	.	ID=SECCE7Rv1G0457350.1.exon.1;Parent=SECCE7Rv1G0457350.1	SECCE7Rv1G0457350.1	1179	present	Chromosome	lo7-cs_q30_rye_filter	SECCE7Rv1G0457350.1	Coverage	100
chr7R	16110540	16110791	.	+	PGSB	exon	.	ID=SECCE7Rv1G0457360.1.exon.1;Parent=SECCE7Rv1G0457360.1	SECCE7Rv1G0457360.1	1506	present	Chromosome	lo7-cs_q30_rye_filter	SECCE7Rv1G0457360.1	Coverage	100
chr7R	16187569	16187914	.	-	PGSB	exon	.	ID=SECCE7Rv1G0457370.1.exon.1;Parent=SECCE7Rv1G0457370.1	SECCE7Rv1G0457370.1	0	absent	Chromosome	lo7-cs_q30_rye_filter	SECCE7Rv1G0457370.1	Coverage	0
chr7R	16289431	16289588	.	-	PGSB	exon	.	ID=SECCE7Rv1G0457380.1.exon.1;Parent=SECCE7Rv1G0457380.1	SECCE7Rv1G0457380.1	375	present	Chromosome	lo7-cs_q30_rye_filter	SECCE7Rv1G0457380.1	Coverage	100
chr7R	16294405	16294466	.	+	PGSB	exon	.	ID=SECCE7Rv1G0457390.1.exon.1;Parent=SECCE7Rv1G0457390.1	SECCE7Rv1G0457390.1	220	present	Chromosome	lo7-cs_q30_rye_filter	SECCE7Rv1G0457390.1	Coverage	99.0991
chr7R	16833623	16833685	.	-	PGSB	exon	.	ID=SECCE7Rv1G0457400.1.exon.1;Parent=SECCE7Rv1G0457400.1	SECCE7Rv1G0457400.1	0	absent	Chromosome	lo7-cs_q30_rye_filter	SECCE7Rv1G0457400.1	Coverage	0
chr7R	16869224	16869708	.	-	PGSB	exon	.	ID=SECCE7Rv1G0457410.1.exon.1;Parent=SECCE7Rv1G0457410.1	SECCE7Rv1G0457410.1	1137	present	Chromosome	lo7-cs_q30_rye_filter	SECCE7Rv1G0457410.1	Coverage	95.9494
chr7R	16873429	16873913	.	-	PGSB	exon	.	ID=SECCE7Rv1G0457420.1.exon.1;Parent=SECCE7Rv1G0457420.1	SECCE7Rv1G0457420.1	1107	present	Chromosome	lo7-cs_q30_rye_filter	SECCE7Rv1G0457420.1	Coverage	100
chr7R	16977874	16979548	.	-	PGSB	exon	.	ID=SECCE7Rv1G0457430.1.exon.1;Parent=SECCE7Rv1G0457430.1	SECCE7Rv1G0457430.1	0	absent	Chromosome	lo7-cs_q30_rye_filter	SECCE7Rv1G0457430.1	Coverage	0
chr7R	17035074	17035226	.	-	PGSB	exon	.	ID=SECCE7Rv1G0457440.1.exon.1;Parent=SECCE7Rv1G0457440.1	SECCE7Rv1G0457440.1	1470	present	Chromosome	lo7-cs_q30_rye_filter	SECCE7Rv1G0457440.1	Coverage	100
chr7R	17296766	17297003	.	+	PGSB	exon	.	ID=SECCE7Rv1G0457450.1.exon.1;Parent=SECCE7Rv1G0457450.1	SECCE7Rv1G0457450.1	237	present	Chromosome	lo7-cs_q30_rye_filter	SECCE7Rv1G0457450.1	Coverage	100
chr7R	17431089	17432391	.	-	PGSB	exon	.	ID=SECCE7Rv1G0457460.1.exon.1;Parent=SECCE7Rv1G0457460.1	SECCE7Rv1G0457460.1	0	absent	Chromosome	lo7-cs_q30_rye_filter	SECCE7Rv1G0457460.1	Coverage	0
chr7R	17432412	17432724	.	-	PGSB	exon	.	ID=SECCE7Rv1G0457470.1.exon.1;Parent=SECCE7Rv1G0457470.1	SECCE7Rv1G0457470.1	0	absent	Chromosome	lo7-cs_q30_rye_filter	SECCE7Rv1G0457470.1	Coverage	0
chr7R	17450186	17452757	.	-	PGSB	exon	.	ID=SECCE7Rv1G0457480.1.exon.1;Parent=SECCE7Rv1G0457480.1	SECCE7Rv1G0457480.1	0	absent	Chromosome	lo7-cs_q30_rye_filter	SECCE7Rv1G0457480.1	Coverage	0
chr7R	17511894	17513127	.	+	PGSB	exon	.	ID=SECCE7Rv1G0457490.1.exon.1;Parent=SECCE7Rv1G0457490.1	SECCE7Rv1G0457490.1	165	present	Chromosome	lo7-cs_q30_rye_filter	SECCE7Rv1G0457490.1	Coverage	13.382
chr7R	17604211	17604370	.	+	PGSB	exon	.	ID=SECCE7Rv1G0457500.1.exon.1;Parent=SECCE7Rv1G0457500.1	SECCE7Rv1G0457500.1	1119	present	Chromosome	lo7-cs_q30_rye_filter	SECCE7Rv1G0457500.1	Coverage	100
chr7R	17612197	17612866	.	+	PGSB	exon	.	ID=SECCE7Rv1G0457510.1.exon.1;Parent=SECCE7Rv1G0457510.1	SECCE7Rv1G0457510.1	669	present	Chromosome	lo7-cs_q30_rye_filter	SECCE7Rv1G0457510.1	Coverage	100
chr7R	17670329	17670644	.	+	PGSB	exon	.	ID=SECCE7Rv1G0457520.1.exon.1;Parent=SECCE7Rv1G0457520.1	SECCE7Rv1G0457520.1	534	present	Chromosome	lo7-cs_q30_rye_filter	SECCE7Rv1G0457520.1	Coverage	100
chr7R	17675973	17676090	.	+	PGSB	exon	.	ID=SECCE7Rv1G0457530.1.exon.1;Parent=SECCE7Rv1G0457530.1	SECCE7Rv1G0457530.1	0	absent	Chromosome	lo7-cs_q30_rye_filter	SECCE7Rv1G0457530.1	Coverage	0
chr7R	17680070	17680092	.	+	PGSB	exon	.	ID=SECCE7Rv1G0457540.1.exon.1;Parent=SECCE7Rv1G0457540.1	SECCE7Rv1G0457540.1	350	present	Chromosome	lo7-cs_q30_rye_filter	SECCE7Rv1G0457540.1	Coverage	27.0688
chr7R	17699956	17700190	.	+	PGSB	exon	.	ID=SECCE7Rv1G0457550.1.exon.1;Parent=SECCE7Rv1G0457550.1	SECCE7Rv1G0457550.1	0	absent	Chromosome	lo7-cs_q30_rye_filter	SECCE7Rv1G0457550.1	Coverage	0
chr7R	17704068	17704090	.	+	PGSB	exon	.	ID=SECCE7Rv1G0457560.1.exon.1;Parent=SECCE7Rv1G0457560.1	SECCE7Rv1G0457560.1	0	absent	Chromosome	lo7-cs_q30_rye_filter	SECCE7Rv1G0457560.1	Coverage	0
chr7R	17893892	17893942	.	-	PGSB	exon	.	ID=SECCE7Rv1G0457570.1.exon.1;Parent=SECCE7Rv1G0457570.1	SECCE7Rv1G0457570.1	963	present	Chromosome	lo7-cs_q30_rye_filter	SECCE7Rv1G0457570.1	Coverage	100
chr7R	17960660	17962562	.	+	PGSB	exon	.	ID=SECCE7Rv1G0457580.1.exon.1;Parent=SECCE7Rv1G0457580.1	SECCE7Rv1G0457580.1	579	present	Chromosome	lo7-cs_q30_rye_filter	SECCE7Rv1G0457580.1	Coverage	30.4416
chr7R	18106641	18106980	.	-	PGSB	exon	.	ID=SECCE7Rv1G0457590.1.exon.1;Parent=SECCE7Rv1G0457590.1	SECCE7Rv1G0457590.1	339	present	Chromosome	lo7-cs_q30_rye_filter	SECCE7Rv1G0457590.1	Coverage	100
chr7R	18107031	18107598	.	-	PGSB	exon	.	ID=SECCE7Rv1G0457600.1.exon.1;Parent=SECCE7Rv1G0457600.1	SECCE7Rv1G0457600.1	567	present	Chromosome	lo7-cs_q30_rye_filter	SECCE7Rv1G0457600.1	Coverage	100
chr7R	18122844	18122996	.	-	PGSB	exon	.	ID=SECCE7Rv1G0457610.1.exon.1;Parent=SECCE7Rv1G0457610.1	SECCE7Rv1G0457610.1	1128	present	Chromosome	lo7-cs_q30_rye_filter	SECCE7Rv1G0457610.1	Coverage	100
chr7R	18125861	18125972	.	-	PGSB	exon	.	ID=SECCE7Rv1G0457620.1.exon.1;Parent=SECCE7Rv1G0457620.1	SECCE7Rv1G0457620.1	291	present	Chromosome	lo7-cs_q30_rye_filter	SECCE7Rv1G0457620.1	Coverage	100
chr7R	18243352	18243374	.	-	PGSB	exon	.	ID=SECCE7Rv1G0457630.1.exon.1;Parent=SECCE7Rv1G0457630.1	SECCE7Rv1G0457630.1	0	absent	Chromosome	lo7-cs_q30_rye_filter	SECCE7Rv1G0457630.1	Coverage	0
chr7R	18244481	18244688	.	+	PGSB	exon	.	ID=SECCE7Rv1G0457640.1.exon.1;Parent=SECCE7Rv1G0457640.1	SECCE7Rv1G0457640.1	292	present	Chromosome	lo7-cs_q30_rye_filter	SECCE7Rv1G0457640.1	Coverage	26.3063
chr7R	18248950	18249844	.	+	PGSB	exon	.	ID=SECCE7Rv1G0457650.1.exon.1;Parent=SECCE7Rv1G0457650.1	SECCE7Rv1G0457650.1	145	present	Chromosome	lo7-cs_q30_rye_filter	SECCE7Rv1G0457650.1	Coverage	16.2192
chr7R	18329072	18330533	.	+	PGSB	exon	.	ID=SECCE7Rv1G0457660.1.exon.1;Parent=SECCE7Rv1G0457660.1	SECCE7Rv1G0457660.1	0	absent	Chromosome	lo7-cs_q30_rye_filter	SECCE7Rv1G0457660.1	Coverage	0
chr7R	18413153	18415298	.	-	PGSB	exon	.	ID=SECCE7Rv1G0457670.1.exon.1;Parent=SECCE7Rv1G0457670.1	SECCE7Rv1G0457670.1	0	absent	Chromosome	lo7-cs_q30_rye_filter	SECCE7Rv1G0457670.1	Coverage	0
chr7R	18495319	18495644	.	+	PGSB	exon	.	ID=SECCE7Rv1G0457680.1.exon.1;Parent=SECCE7Rv1G0457680.1	SECCE7Rv1G0457680.1	2202	present	Chromosome	lo7-cs_q30_rye_filter	SECCE7Rv1G0457680.1	Coverage	100
chr7R	18563079	18563116	.	-	PGSB	exon	.	ID=SECCE7Rv1G0457690.1.exon.1;Parent=SECCE7Rv1G0457690.1	SECCE7Rv1G0457690.1	357	present	Chromosome	lo7-cs_q30_rye_filter	SECCE7Rv1G0457690.1	Coverage	55.0926
chr7R	18565986	18566570	.	-	PGSB	exon	.	ID=SECCE7Rv1G0457700.1.exon.1;Parent=SECCE7Rv1G0457700.1	SECCE7Rv1G0457700.1	751	present	Chromosome	lo7-cs_q30_rye_filter	SECCE7Rv1G0457700.1	Coverage	52.0444
chr7R	18569310	18569640	.	+	PGSB	exon	.	ID=SECCE7Rv1G0457710.1.exon.1;Parent=SECCE7Rv1G0457710.1	SECCE7Rv1G0457710.1	1384	present	Chromosome	lo7-cs_q30_rye_filter	SECCE7Rv1G0457710.1	Coverage	90.4575
chr7R	18578327	18578693	.	-	PGSB	exon	.	ID=SECCE7Rv1G0457720.1.exon.1;Parent=SECCE7Rv1G0457720.1	SECCE7Rv1G0457720.1	186	present	Chromosome	lo7-cs_q30_rye_filter	SECCE7Rv1G0457720.1	Coverage	50.8197
chr7R	18638903	18639554	.	+	PGSB	exon	.	ID=SECCE7Rv1G0457730.1.exon.1;Parent=SECCE7Rv1G0457730.1	SECCE7Rv1G0457730.1	1147	present	Chromosome	lo7-cs_q30_rye_filter	SECCE7Rv1G0457730.1	Coverage	97.534
chr7R	18647144	18647504	.	-	PGSB	exon	.	ID=SECCE7Rv1G0457740.1.exon.1;Parent=SECCE7Rv1G0457740.1	SECCE7Rv1G0457740.1	1545	present	Chromosome	lo7-cs_q30_rye_filter	SECCE7Rv1G0457740.1	Coverage	100
chr7R	18657321	18657415	.	+	PGSB	exon	.	ID=SECCE7Rv1G0457750.1.exon.1;Parent=SECCE7Rv1G0457750.1	SECCE7Rv1G0457750.1	1101	present	Chromosome	lo7-cs_q30_rye_filter	SECCE7Rv1G0457750.1	Coverage	99.458
chr7R	18684588	18684783	.	-	PGSB	exon	.	ID=SECCE7Rv1G0457760.1.exon.1;Parent=SECCE7Rv1G0457760.1	SECCE7Rv1G0457760.1	0	absent	Chromosome	lo7-cs_q30_rye_filter	SECCE7Rv1G0457760.1	Coverage	0
chr7R	18687464	18687977	.	-	PGSB	exon	.	ID=SECCE7Rv1G0457770.1.exon.1;Parent=SECCE7Rv1G0457770.1	SECCE7Rv1G0457770.1	0	absent	Chromosome	lo7-cs_q30_rye_filter	SECCE7Rv1G0457770.1	Coverage	0
chr7R	18695944	18696037	.	-	PGSB	exon	.	ID=SECCE7Rv1G0457780.1.exon.1;Parent=SECCE7Rv1G0457780.1	SECCE7Rv1G0457780.1	624	present	Chromosome	lo7-cs_q30_rye_filter	SECCE7Rv1G0457780.1	Coverage	55.7641
chr7R	18721741	18723808	.	-	PGSB	exon	.	ID=SECCE7Rv1G0457790.1.exon.1;Parent=SECCE7Rv1G0457790.1	SECCE7Rv1G0457790.1	587	present	Chromosome	lo7-cs_q30_rye_filter	SECCE7Rv1G0457790.1	Coverage	28.3986
chr7R	18724067	18724597	.	+	PGSB	exon	.	ID=SECCE7Rv1G0457800.1.exon.1;Parent=SECCE7Rv1G0457800.1	SECCE7Rv1G0457800.1	609	present	Chromosome	lo7-cs_q30_rye_filter	SECCE7Rv1G0457800.1	Coverage	39.5712
chr7R	18728559	18728637	.	-	PGSB	exon	.	ID=SECCE7Rv1G0457810.1.exon.1;Parent=SECCE7Rv1G0457810.1	SECCE7Rv1G0457810.1	0	absent	Chromosome	lo7-cs_q30_rye_filter	SECCE7Rv1G0457810.1	Coverage	0
chr7R	18763562	18764180	.	+	PGSB	exon	.	ID=SECCE7Rv1G0457820.1.exon.1;Parent=SECCE7Rv1G0457820.1	SECCE7Rv1G0457820.1	0	absent	Chromosome	lo7-cs_q30_rye_filter	SECCE7Rv1G0457820.1	Coverage	0
chr7R	18768599	18769229	.	+	PGSB	exon	.	ID=SECCE7Rv1G0457830.1.exon.1;Parent=SECCE7Rv1G0457830.1	SECCE7Rv1G0457830.1	0	absent	Chromosome	lo7-cs_q30_rye_filter	SECCE7Rv1G0457830.1	Coverage	0
chr7R	18826918	18827023	.	-	PGSB	exon	.	ID=SECCE7Rv1G0457840.1.exon.1;Parent=SECCE7Rv1G0457840.1	SECCE7Rv1G0457840.1	0	absent	Chromosome	lo7-cs_q30_rye_filter	SECCE7Rv1G0457840.1	Coverage	0
chr7R	18847841	18847894	.	-	PGSB	exon	.	ID=SECCE7Rv1G0457850.1.exon.1;Parent=SECCE7Rv1G0457850.1	SECCE7Rv1G0457850.1	0	absent	Chromosome	lo7-cs_q30_rye_filter	SECCE7Rv1G0457850.1	Coverage	0
chr7R	18850903	18851467	.	+	PGSB	exon	.	ID=SECCE7Rv1G0457860.1.exon.1;Parent=SECCE7Rv1G0457860.1	SECCE7Rv1G0457860.1	183	present	Chromosome	lo7-cs_q30_rye_filter	SECCE7Rv1G0457860.1	Coverage	32.4468
chr7R	18902016	18902052	.	-	PGSB	exon	.	ID=SECCE7Rv1G0457870.1.exon.1;Parent=SECCE7Rv1G0457870.1	SECCE7Rv1G0457870.1	905	present	Chromosome	lo7-cs_q30_rye_filter	SECCE7Rv1G0457870.1	Coverage	36.5214
chr7R	18918766	18918985	.	-	PGSB	exon	.	ID=SECCE7Rv1G0457880.1.exon.1;Parent=SECCE7Rv1G0457880.1	SECCE7Rv1G0457880.1	2278	present	Chromosome	lo7-cs_q30_rye_filter	SECCE7Rv1G0457880.1	Coverage	85.5105
chr7R	19018540	19018909	.	-	PGSB	exon	.	ID=SECCE7Rv1G0457890.1.exon.1;Parent=SECCE7Rv1G0457890.1	SECCE7Rv1G0457890.1	0	absent	Chromosome	lo7-cs_q30_rye_filter	SECCE7Rv1G0457890.1	Coverage	0
chr7R	19071271	19071468	.	+	PGSB	exon	.	ID=SECCE7Rv1G0457900.1.exon.1;Parent=SECCE7Rv1G0457900.1	SECCE7Rv1G0457900.1	593	present	Chromosome	lo7-cs_q30_rye_filter	SECCE7Rv1G0457900.1	Coverage	48.9274
chr7R	19152111	19152258	.	+	PGSB	exon	.	ID=SECCE7Rv1G0457910.1.exon.1;Parent=SECCE7Rv1G0457910.1	SECCE7Rv1G0457910.1	881	present	Chromosome	lo7-cs_q30_rye_filter	SECCE7Rv1G0457910.1	Coverage	70.934
chr7R	19158196	19158442	.	-	PGSB	exon	.	ID=SECCE7Rv1G0457920.1.exon.1;Parent=SECCE7Rv1G0457920.1	SECCE7Rv1G0457920.1	630	present	Chromosome	lo7-cs_q30_rye_filter	SECCE7Rv1G0457920.1	Coverage	100
chr7R	19498886	19499498	.	-	PGSB	exon	.	ID=SECCE7Rv1G0457930.1.exon.1;Parent=SECCE7Rv1G0457930.1	SECCE7Rv1G0457930.1	0	absent	Chromosome	lo7-cs_q30_rye_filter	SECCE7Rv1G0457930.1	Coverage	0
chr7R	19507590	19508148	.	-	PGSB	exon	.	ID=SECCE7Rv1G0457940.1.exon.1;Parent=SECCE7Rv1G0457940.1	SECCE7Rv1G0457940.1	195	present	Chromosome	lo7-cs_q30_rye_filter	SECCE7Rv1G0457940.1	Coverage	34.9462
chr7R	19530546	19531104	.	-	PGSB	exon	.	ID=SECCE7Rv1G0457950.1.exon.1;Parent=SECCE7Rv1G0457950.1	SECCE7Rv1G0457950.1	155	present	Chromosome	lo7-cs_q30_rye_filter	SECCE7Rv1G0457950.1	Coverage	27.7778
chr7R	19555365	19555878	.	+	PGSB	exon	.	ID=SECCE7Rv1G0457960.1.exon.1;Parent=SECCE7Rv1G0457960.1	SECCE7Rv1G0457960.1	513	present	Chromosome	lo7-cs_q30_rye_filter	SECCE7Rv1G0457960.1	Coverage	100
chr7R	19558731	19559097	.	+	PGSB	exon	.	ID=SECCE7Rv1G0457970.1.exon.1;Parent=SECCE7Rv1G0457970.1	SECCE7Rv1G0457970.1	366	present	Chromosome	lo7-cs_q30_rye_filter	SECCE7Rv1G0457970.1	Coverage	100
chr7R	19596715	19597243	.	-	PGSB	exon	.	ID=SECCE7Rv1G0457980.1.exon.1;Parent=SECCE7Rv1G0457980.1	SECCE7Rv1G0457980.1	528	present	Chromosome	lo7-cs_q30_rye_filter	SECCE7Rv1G0457980.1	Coverage	100
chr7R	19604060	19604546	.	-	PGSB	exon	.	ID=SECCE7Rv1G0457990.1.exon.1;Parent=SECCE7Rv1G0457990.1	SECCE7Rv1G0457990.1	603	present	Chromosome	lo7-cs_q30_rye_filter	SECCE7Rv1G0457990.1	Coverage	89.3333
chr7R	19608484	19608814	.	+	PGSB	exon	.	ID=SECCE7Rv1G0458000.1.exon.1;Parent=SECCE7Rv1G0458000.1	SECCE7Rv1G0458000.1	0	absent	Chromosome	lo7-cs_q30_rye_filter	SECCE7Rv1G0458000.1	Coverage	0
chr7R	19640680	19640797	.	+	PGSB	exon	.	ID=SECCE7Rv1G0458010.1.exon.1;Parent=SECCE7Rv1G0458010.1	SECCE7Rv1G0458010.1	332	present	Chromosome	lo7-cs_q30_rye_filter	SECCE7Rv1G0458010.1	Coverage	37.7702
chr7R	19644840	19644846	.	-	PGSB	exon	.	ID=SECCE7Rv1G0458020.1.exon.1;Parent=SECCE7Rv1G0458020.1	SECCE7Rv1G0458020.1	544	present	Chromosome	lo7-cs_q30_rye_filter	SECCE7Rv1G0458020.1	Coverage	55.6237
chr7R	19708113	19708299	.	+	PGSB	exon	.	ID=SECCE7Rv1G0458030.1.exon.1;Parent=SECCE7Rv1G0458030.1	SECCE7Rv1G0458030.1	1155	present	Chromosome	lo7-cs_q30_rye_filter	SECCE7Rv1G0458030.1	Coverage	100
chr7R	19751401	19751773	.	-	PGSB	exon	.	ID=SECCE7Rv1G0458040.1.exon.1;Parent=SECCE7Rv1G0458040.1	SECCE7Rv1G0458040.1	0	absent	Chromosome	lo7-cs_q30_rye_filter	SECCE7Rv1G0458040.1	Coverage	0
chr7R	19755833	19756199	.	+	PGSB	exon	.	ID=SECCE7Rv1G0458050.1.exon.1;Parent=SECCE7Rv1G0458050.1	SECCE7Rv1G0458050.1	235	present	Chromosome	lo7-cs_q30_rye_filter	SECCE7Rv1G0458050.1	Coverage	64.2077
chr7R	19757200	19757373	.	-	PGSB	exon	.	ID=SECCE7Rv1G0458060.1.exon.1;Parent=SECCE7Rv1G0458060.1	SECCE7Rv1G0458060.1	449	present	Chromosome	lo7-cs_q30_rye_filter	SECCE7Rv1G0458060.1	Coverage	42.6401
chr7R	19917436	19918366	.	-	PGSB	exon	.	ID=SECCE7Rv1G0458070.1.exon.1;Parent=SECCE7Rv1G0458070.1	SECCE7Rv1G0458070.1	0	absent	Chromosome	lo7-cs_q30_rye_filter	SECCE7Rv1G0458070.1	Coverage	0
chr7R	19928239	19928699	.	-	PGSB	exon	.	ID=SECCE7Rv1G0458080.1.exon.1;Parent=SECCE7Rv1G0458080.1	SECCE7Rv1G0458080.1	64	absent	Chromosome	lo7-cs_q30_rye_filter	SECCE7Rv1G0458080.1	Coverage	4.67836
chr7R	19959164	19960445	.	-	PGSB	exon	.	ID=SECCE7Rv1G0458090.1.exon.1;Parent=SECCE7Rv1G0458090.1	SECCE7Rv1G0458090.1	1266	present	Chromosome	lo7-cs_q30_rye_filter	SECCE7Rv1G0458090.1	Coverage	98.829
chr7R	20085813	20086194	.	-	PGSB	exon	.	ID=SECCE7Rv1G0458100.1.exon.1;Parent=SECCE7Rv1G0458100.1	SECCE7Rv1G0458100.1	1112	present	Chromosome	lo7-cs_q30_rye_filter	SECCE7Rv1G0458100.1	Coverage	81.6446
chr7R	20091419	20091641	.	-	PGSB	exon	.	ID=SECCE7Rv1G0458110.1.exon.1;Parent=SECCE7Rv1G0458110.1	SECCE7Rv1G0458110.1	222	present	Chromosome	lo7-cs_q30_rye_filter	SECCE7Rv1G0458110.1	Coverage	100
chr7R	20094176	20094374	.	+	PGSB	exon	.	ID=SECCE7Rv1G0458120.1.exon.1;Parent=SECCE7Rv1G0458120.1	SECCE7Rv1G0458120.1	198	present	Chromosome	lo7-cs_q30_rye_filter	SECCE7Rv1G0458120.1	Coverage	100
chr7R	20098192	20098426	.	-	PGSB	exon	.	ID=SECCE7Rv1G0458130.1.exon.1;Parent=SECCE7Rv1G0458130.1	SECCE7Rv1G0458130.1	234	present	Chromosome	lo7-cs_q30_rye_filter	SECCE7Rv1G0458130.1	Coverage	100
chr7R	20098657	20098852	.	-	PGSB	exon	.	ID=SECCE7Rv1G0458140.1.exon.1;Parent=SECCE7Rv1G0458140.1	SECCE7Rv1G0458140.1	195	present	Chromosome	lo7-cs_q30_rye_filter	SECCE7Rv1G0458140.1	Coverage	100
chr7R	20098921	20099149	.	-	PGSB	exon	.	ID=SECCE7Rv1G0458150.1.exon.1;Parent=SECCE7Rv1G0458150.1	SECCE7Rv1G0458150.1	228	present	Chromosome	lo7-cs_q30_rye_filter	SECCE7Rv1G0458150.1	Coverage	100
chr7R	20213886	20214267	.	-	PGSB	exon	.	ID=SECCE7Rv1G0458160.1.exon.1;Parent=SECCE7Rv1G0458160.1	SECCE7Rv1G0458160.1	1266	present	Chromosome	lo7-cs_q30_rye_filter	SECCE7Rv1G0458160.1	Coverage	92.7473
chr7R	20259612	20259627	.	-	PGSB	exon	.	ID=SECCE7Rv1G0458170.1.exon.1;Parent=SECCE7Rv1G0458170.1	SECCE7Rv1G0458170.1	0	absent	Chromosome	lo7-cs_q30_rye_filter	SECCE7Rv1G0458170.1	Coverage	0
chr7R	20288813	20290877	.	+	PGSB	exon	.	ID=SECCE7Rv1G0458180.1.exon.1;Parent=SECCE7Rv1G0458180.1	SECCE7Rv1G0458180.1	2021	present	Chromosome	lo7-cs_q30_rye_filter	SECCE7Rv1G0458180.1	Coverage	97.9167
chr7R	20588496	20588751	.	-	PGSB	exon	.	ID=SECCE7Rv1G0458190.1.exon.1;Parent=SECCE7Rv1G0458190.1	SECCE7Rv1G0458190.1	0	absent	Chromosome	lo7-cs_q30_rye_filter	SECCE7Rv1G0458190.1	Coverage	0
chr7R	20595033	20595426	.	-	PGSB	exon	.	ID=SECCE7Rv1G0458200.1.exon.1;Parent=SECCE7Rv1G0458200.1	SECCE7Rv1G0458200.1	0	absent	Chromosome	lo7-cs_q30_rye_filter	SECCE7Rv1G0458200.1	Coverage	0
chr7R	20636972	20637164	.	-	PGSB	exon	.	ID=SECCE7Rv1G0458210.1.exon.1;Parent=SECCE7Rv1G0458210.1	SECCE7Rv1G0458210.1	0	absent	Chromosome	lo7-cs_q30_rye_filter	SECCE7Rv1G0458210.1	Coverage	0
chr7R	20640654	20641074	.	-	PGSB	exon	.	ID=SECCE7Rv1G0458220.1.exon.1;Parent=SECCE7Rv1G0458220.1	SECCE7Rv1G0458220.1	0	absent	Chromosome	lo7-cs_q30_rye_filter	SECCE7Rv1G0458220.1	Coverage	0
chr7R	20688820	20689027	.	-	PGSB	exon	.	ID=SECCE7Rv1G0458230.1.exon.1;Parent=SECCE7Rv1G0458230.1	SECCE7Rv1G0458230.1	0	absent	Chromosome	lo7-cs_q30_rye_filter	SECCE7Rv1G0458230.1	Coverage	0
chr7R	20689670	20689862	.	-	PGSB	exon	.	ID=SECCE7Rv1G0458240.1.exon.1;Parent=SECCE7Rv1G0458240.1	SECCE7Rv1G0458240.1	0	absent	Chromosome	lo7-cs_q30_rye_filter	SECCE7Rv1G0458240.1	Coverage	0
chr7R	20693614	20693836	.	-	PGSB	exon	.	ID=SECCE7Rv1G0458250.1.exon.1;Parent=SECCE7Rv1G0458250.1	SECCE7Rv1G0458250.1	0	absent	Chromosome	lo7-cs_q30_rye_filter	SECCE7Rv1G0458250.1	Coverage	0
chr7R	21005043	21005214	.	-	PGSB	exon	.	ID=SECCE7Rv1G0458260.1.exon.1;Parent=SECCE7Rv1G0458260.1	SECCE7Rv1G0458260.1	154	present	Chromosome	lo7-cs_q30_rye_filter	SECCE7Rv1G0458260.1	Coverage	37.7451
chr7R	21033861	21034213	.	+	PGSB	exon	.	ID=SECCE7Rv1G0458270.1.exon.1;Parent=SECCE7Rv1G0458270.1	SECCE7Rv1G0458270.1	0	absent	Chromosome	lo7-cs_q30_rye_filter	SECCE7Rv1G0458270.1	Coverage	0
chr7R	21046045	21046495	.	-	PGSB	exon	.	ID=SECCE7Rv1G0458280.1.exon.1;Parent=SECCE7Rv1G0458280.1	SECCE7Rv1G0458280.1	0	absent	Chromosome	lo7-cs_q30_rye_filter	SECCE7Rv1G0458280.1	Coverage	0
chr7R	21122866	21122958	.	+	PGSB	exon	.	ID=SECCE7Rv1G0458290.1.exon.1;Parent=SECCE7Rv1G0458290.1	SECCE7Rv1G0458290.1	0	absent	Chromosome	lo7-cs_q30_rye_filter	SECCE7Rv1G0458290.1	Coverage	0
chr7R	21159756	21160224	.	-	PGSB	exon	.	ID=SECCE7Rv1G0458300.1.exon.1;Parent=SECCE7Rv1G0458300.1	SECCE7Rv1G0458300.1	0	absent	Chromosome	lo7-cs_q30_rye_filter	SECCE7Rv1G0458300.1	Coverage	0
chr7R	21191414	21191702	.	-	PGSB	exon	.	ID=SECCE7Rv1G0458310.1.exon.1;Parent=SECCE7Rv1G0458310.1	SECCE7Rv1G0458310.1	288	present	Chromosome	lo7-cs_q30_rye_filter	SECCE7Rv1G0458310.1	Coverage	100
chr7R	21193900	21194192	.	-	PGSB	exon	.	ID=SECCE7Rv1G0458320.1.exon.1;Parent=SECCE7Rv1G0458320.1	SECCE7Rv1G0458320.1	534	present	Chromosome	lo7-cs_q30_rye_filter	SECCE7Rv1G0458320.1	Coverage	100
chr7R	21348512	21348682	.	+	PGSB	exon	.	ID=SECCE7Rv1G0458330.1.exon.1;Parent=SECCE7Rv1G0458330.1	SECCE7Rv1G0458330.1	1753	present	Chromosome	lo7-cs_q30_rye_filter	SECCE7Rv1G0458330.1	Coverage	99.7156
chr7R	21359316	21359475	.	+	PGSB	exon	.	ID=SECCE7Rv1G0458340.1.exon.1;Parent=SECCE7Rv1G0458340.1	SECCE7Rv1G0458340.1	241	present	Chromosome	lo7-cs_q30_rye_filter	SECCE7Rv1G0458340.1	Coverage	18.8134
chr7R	21371603	21372176	.	-	PGSB	exon	.	ID=SECCE7Rv1G0458350.1.exon.1;Parent=SECCE7Rv1G0458350.1	SECCE7Rv1G0458350.1	1297	present	Chromosome	lo7-cs_q30_rye_filter	SECCE7Rv1G0458350.1	Coverage	93.1753
chr7R	21405708	21405933	.	-	PGSB	exon	.	ID=SECCE7Rv1G0458360.1.exon.1;Parent=SECCE7Rv1G0458360.1	SECCE7Rv1G0458360.1	866	present	Chromosome	lo7-cs_q30_rye_filter	SECCE7Rv1G0458360.1	Coverage	73.6395
chr7R	21411112	21411265	.	+	PGSB	exon	.	ID=SECCE7Rv1G0458370.1.exon.1;Parent=SECCE7Rv1G0458370.1	SECCE7Rv1G0458370.1	0	absent	Chromosome	lo7-cs_q30_rye_filter	SECCE7Rv1G0458370.1	Coverage	0
chr7R	21499459	21499684	.	-	PGSB	exon	.	ID=SECCE7Rv1G0458380.1.exon.1;Parent=SECCE7Rv1G0458380.1	SECCE7Rv1G0458380.1	0	absent	Chromosome	lo7-cs_q30_rye_filter	SECCE7Rv1G0458380.1	Coverage	0
chr7R	21506783	21506881	.	+	PGSB	exon	.	ID=SECCE7Rv1G0458390.1.exon.1;Parent=SECCE7Rv1G0458390.1	SECCE7Rv1G0458390.1	0	absent	Chromosome	lo7-cs_q30_rye_filter	SECCE7Rv1G0458390.1	Coverage	0
chr7R	21722421	21722733	.	+	PGSB	exon	.	ID=SECCE7Rv1G0458400.1.exon.1;Parent=SECCE7Rv1G0458400.1	SECCE7Rv1G0458400.1	0	absent	Chromosome	lo7-cs_q30_rye_filter	SECCE7Rv1G0458400.1	Coverage	0
chr7R	21722754	21724230	.	+	PGSB	exon	.	ID=SECCE7Rv1G0458410.1.exon.1;Parent=SECCE7Rv1G0458410.1	SECCE7Rv1G0458410.1	0	absent	Chromosome	lo7-cs_q30_rye_filter	SECCE7Rv1G0458410.1	Coverage	0
chr7R	21729211	21729556	.	+	PGSB	exon	.	ID=SECCE7Rv1G0458420.1.exon.1;Parent=SECCE7Rv1G0458420.1	SECCE7Rv1G0458420.1	0	absent	Chromosome	lo7-cs_q30_rye_filter	SECCE7Rv1G0458420.1	Coverage	0
chr7R	21777175	21778441	.	+	PGSB	exon	.	ID=SECCE7Rv1G0458430.1.exon.1;Parent=SECCE7Rv1G0458430.1	SECCE7Rv1G0458430.1	1042	present	Chromosome	lo7-cs_q30_rye_filter	SECCE7Rv1G0458430.1	Coverage	82.3065
chr7R	21801363	21801598	.	-	PGSB	exon	.	ID=SECCE7Rv1G0458440.1.exon.1;Parent=SECCE7Rv1G0458440.1	SECCE7Rv1G0458440.1	0	absent	Chromosome	lo7-cs_q30_rye_filter	SECCE7Rv1G0458440.1	Coverage	0
chr7R	21818007	21818639	.	-	PGSB	exon	.	ID=SECCE7Rv1G0458450.1.exon.1;Parent=SECCE7Rv1G0458450.1	SECCE7Rv1G0458450.1	0	absent	Chromosome	lo7-cs_q30_rye_filter	SECCE7Rv1G0458450.1	Coverage	0
chr7R	21864530	21865162	.	-	PGSB	exon	.	ID=SECCE7Rv1G0458460.1.exon.1;Parent=SECCE7Rv1G0458460.1	SECCE7Rv1G0458460.1	511	present	Chromosome	lo7-cs_q30_rye_filter	SECCE7Rv1G0458460.1	Coverage	66.2776
chr7R	21913644	21914276	.	-	PGSB	exon	.	ID=SECCE7Rv1G0458470.1.exon.1;Parent=SECCE7Rv1G0458470.1	SECCE7Rv1G0458470.1	81	present	Chromosome	lo7-cs_q30_rye_filter	SECCE7Rv1G0458470.1	Coverage	10.5058
chr7R	21931138	21931770	.	-	PGSB	exon	.	ID=SECCE7Rv1G0458480.1.exon.1;Parent=SECCE7Rv1G0458480.1	SECCE7Rv1G0458480.1	0	absent	Chromosome	lo7-cs_q30_rye_filter	SECCE7Rv1G0458480.1	Coverage	0
chr7R	21950458	21951090	.	-	PGSB	exon	.	ID=SECCE7Rv1G0458490.1.exon.1;Parent=SECCE7Rv1G0458490.1	SECCE7Rv1G0458490.1	0	absent	Chromosome	lo7-cs_q30_rye_filter	SECCE7Rv1G0458490.1	Coverage	0
chr7R	22026767	22027399	.	-	PGSB	exon	.	ID=SECCE7Rv1G0458500.1.exon.1;Parent=SECCE7Rv1G0458500.1	SECCE7Rv1G0458500.1	177	present	Chromosome	lo7-cs_q30_rye_filter	SECCE7Rv1G0458500.1	Coverage	23.1373
chr7R	22048017	22048482	.	+	PGSB	exon	.	ID=SECCE7Rv1G0458510.1.exon.1;Parent=SECCE7Rv1G0458510.1	SECCE7Rv1G0458510.1	0	absent	Chromosome	lo7-cs_q30_rye_filter	SECCE7Rv1G0458510.1	Coverage	0
chr7R	22049062	22049827	.	+	PGSB	exon	.	ID=SECCE7Rv1G0458520.1.exon.1;Parent=SECCE7Rv1G0458520.1	SECCE7Rv1G0458520.1	0	absent	Chromosome	lo7-cs_q30_rye_filter	SECCE7Rv1G0458520.1	Coverage	0
chr7R	22144760	22147138	.	+	PGSB	exon	.	ID=SECCE7Rv1G0458530.1.exon.1;Parent=SECCE7Rv1G0458530.1	SECCE7Rv1G0458530.1	2378	present	Chromosome	lo7-cs_q30_rye_filter	SECCE7Rv1G0458530.1	Coverage	100
chr7R	22147488	22147798	.	+	PGSB	exon	.	ID=SECCE7Rv1G0458540.1.exon.1;Parent=SECCE7Rv1G0458540.1	SECCE7Rv1G0458540.1	310	present	Chromosome	lo7-cs_q30_rye_filter	SECCE7Rv1G0458540.1	Coverage	100
chr7R	22149422	22149647	.	+	PGSB	exon	.	ID=SECCE7Rv1G0458550.1.exon.1;Parent=SECCE7Rv1G0458550.1	SECCE7Rv1G0458550.1	208	present	Chromosome	lo7-cs_q30_rye_filter	SECCE7Rv1G0458550.1	Coverage	92.4444
chr7R	22156858	22157934	.	-	PGSB	exon	.	ID=SECCE7Rv1G0458560.1.exon.1;Parent=SECCE7Rv1G0458560.1	SECCE7Rv1G0458560.1	1113	present	Chromosome	lo7-cs_q30_rye_filter	SECCE7Rv1G0458560.1	Coverage	60.2273
chr7R	22162450	22163172	.	+	PGSB	exon	.	ID=SECCE7Rv1G0458570.1.exon.1;Parent=SECCE7Rv1G0458570.1	SECCE7Rv1G0458570.1	679	present	Chromosome	lo7-cs_q30_rye_filter	SECCE7Rv1G0458570.1	Coverage	33.4318
chr7R	22173226	22173424	.	-	PGSB	exon	.	ID=SECCE7Rv1G0458580.1.exon.1;Parent=SECCE7Rv1G0458580.1	SECCE7Rv1G0458580.1	870	present	Chromosome	lo7-cs_q30_rye_filter	SECCE7Rv1G0458580.1	Coverage	100
chr7R	22196004	22196316	.	-	PGSB	exon	.	ID=SECCE7Rv1G0458590.1.exon.1;Parent=SECCE7Rv1G0458590.1	SECCE7Rv1G0458590.1	409	present	Chromosome	lo7-cs_q30_rye_filter	SECCE7Rv1G0458590.1	Coverage	97.381
chr7R	22197381	22197699	.	+	PGSB	exon	.	ID=SECCE7Rv1G0458600.1.exon.1;Parent=SECCE7Rv1G0458600.1	SECCE7Rv1G0458600.1	0	absent	Chromosome	lo7-cs_q30_rye_filter	SECCE7Rv1G0458600.1	Coverage	0
chr7R	22226376	22226601	.	+	PGSB	exon	.	ID=SECCE7Rv1G0458610.1.exon.1;Parent=SECCE7Rv1G0458610.1	SECCE7Rv1G0458610.1	0	absent	Chromosome	lo7-cs_q30_rye_filter	SECCE7Rv1G0458610.1	Coverage	0
chr7R	22232227	22232545	.	+	PGSB	exon	.	ID=SECCE7Rv1G0458620.1.exon.1;Parent=SECCE7Rv1G0458620.1	SECCE7Rv1G0458620.1	904	present	Chromosome	lo7-cs_q30_rye_filter	SECCE7Rv1G0458620.1	Coverage	21.7255
chr7R	22252791	22254063	.	-	PGSB	exon	.	ID=SECCE7Rv1G0458630.1.exon.1;Parent=SECCE7Rv1G0458630.1	SECCE7Rv1G0458630.1	1272	present	Chromosome	lo7-cs_q30_rye_filter	SECCE7Rv1G0458630.1	Coverage	100
chr7R	22269594	22269804	.	-	PGSB	exon	.	ID=SECCE7Rv1G0458640.1.exon.1;Parent=SECCE7Rv1G0458640.1	SECCE7Rv1G0458640.1	210	present	Chromosome	lo7-cs_q30_rye_filter	SECCE7Rv1G0458640.1	Coverage	100
chr7R	22294247	22294439	.	+	PGSB	exon	.	ID=SECCE7Rv1G0458650.1.exon.1;Parent=SECCE7Rv1G0458650.1	SECCE7Rv1G0458650.1	0	absent	Chromosome	lo7-cs_q30_rye_filter	SECCE7Rv1G0458650.1	Coverage	0
chr7R	22367134	22367338	.	-	PGSB	exon	.	ID=SECCE7Rv1G0458660.1.exon.1;Parent=SECCE7Rv1G0458660.1	SECCE7Rv1G0458660.1	0	absent	Chromosome	lo7-cs_q30_rye_filter	SECCE7Rv1G0458660.1	Coverage	0
chr7R	22420206	22421478	.	-	PGSB	exon	.	ID=SECCE7Rv1G0458670.1.exon.1;Parent=SECCE7Rv1G0458670.1	SECCE7Rv1G0458670.1	211	present	Chromosome	lo7-cs_q30_rye_filter	SECCE7Rv1G0458670.1	Coverage	16.5881
chr7R	22423340	22423565	.	-	PGSB	exon	.	ID=SECCE7Rv1G0458680.1.exon.1;Parent=SECCE7Rv1G0458680.1	SECCE7Rv1G0458680.1	333	present	Chromosome	lo7-cs_q30_rye_filter	SECCE7Rv1G0458680.1	Coverage	93.2773
chr7R	22434098	22434695	.	-	PGSB	exon	.	ID=SECCE7Rv1G0458690.1.exon.1;Parent=SECCE7Rv1G0458690.1	SECCE7Rv1G0458690.1	0	absent	Chromosome	lo7-cs_q30_rye_filter	SECCE7Rv1G0458690.1	Coverage	0
chr7R	22470702	22471902	.	+	PGSB	exon	.	ID=SECCE7Rv1G0458700.1.exon.1;Parent=SECCE7Rv1G0458700.1	SECCE7Rv1G0458700.1	0	absent	Chromosome	lo7-cs_q30_rye_filter	SECCE7Rv1G0458700.1	Coverage	0
chr7R	22484084	22484978	.	+	PGSB	exon	.	ID=SECCE7Rv1G0458710.1.exon.1;Parent=SECCE7Rv1G0458710.1	SECCE7Rv1G0458710.1	7	absent	Chromosome	lo7-cs_q30_rye_filter	SECCE7Rv1G0458710.1	Coverage	0.755124
chr7R	22506045	22506939	.	+	PGSB	exon	.	ID=SECCE7Rv1G0458720.1.exon.1;Parent=SECCE7Rv1G0458720.1	SECCE7Rv1G0458720.1	0	absent	Chromosome	lo7-cs_q30_rye_filter	SECCE7Rv1G0458720.1	Coverage	0
chr7R	22564185	22564539	.	-	PGSB	exon	.	ID=SECCE7Rv1G0458730.1.exon.1;Parent=SECCE7Rv1G0458730.1	SECCE7Rv1G0458730.1	863	present	Chromosome	lo7-cs_q30_rye_filter	SECCE7Rv1G0458730.1	Coverage	61.2057
chr7R	22596983	22597061	.	+	PGSB	exon	.	ID=SECCE7Rv1G0458740.1.exon.1;Parent=SECCE7Rv1G0458740.1	SECCE7Rv1G0458740.1	0	absent	Chromosome	lo7-cs_q30_rye_filter	SECCE7Rv1G0458740.1	Coverage	0
chr7R	22618076	22618775	.	+	PGSB	exon	.	ID=SECCE7Rv1G0458750.1.exon.1;Parent=SECCE7Rv1G0458750.1	SECCE7Rv1G0458750.1	699	present	Chromosome	lo7-cs_q30_rye_filter	SECCE7Rv1G0458750.1	Coverage	100
chr7R	22619289	22619304	.	+	PGSB	exon	.	ID=SECCE7Rv1G0458760.1.exon.1;Parent=SECCE7Rv1G0458760.1	SECCE7Rv1G0458760.1	363	present	Chromosome	lo7-cs_q30_rye_filter	SECCE7Rv1G0458760.1	Coverage	100
chr7R	22635539	22635773	.	-	PGSB	exon	.	ID=SECCE7Rv1G0458770.1.exon.1;Parent=SECCE7Rv1G0458770.1	SECCE7Rv1G0458770.1	1083	present	Chromosome	lo7-cs_q30_rye_filter	SECCE7Rv1G0458770.1	Coverage	96.0106
chr7R	22655615	22655981	.	+	PGSB	exon	.	ID=SECCE7Rv1G0458780.1.exon.1;Parent=SECCE7Rv1G0458780.1	SECCE7Rv1G0458780.1	332	present	Chromosome	lo7-cs_q30_rye_filter	SECCE7Rv1G0458780.1	Coverage	90.7104
chr7R	22784437	22784803	.	-	PGSB	exon	.	ID=SECCE7Rv1G0458790.1.exon.1;Parent=SECCE7Rv1G0458790.1	SECCE7Rv1G0458790.1	1458	present	Chromosome	lo7-cs_q30_rye_filter	SECCE7Rv1G0458790.1	Coverage	100
chr7R	22798697	22799930	.	-	PGSB	exon	.	ID=SECCE7Rv1G0458800.1.exon.1;Parent=SECCE7Rv1G0458800.1	SECCE7Rv1G0458800.1	1233	present	Chromosome	lo7-cs_q30_rye_filter	SECCE7Rv1G0458800.1	Coverage	100
chr7R	22825241	22825475	.	-	PGSB	exon	.	ID=SECCE7Rv1G0458810.1.exon.1;Parent=SECCE7Rv1G0458810.1	SECCE7Rv1G0458810.1	0	absent	Chromosome	lo7-cs_q30_rye_filter	SECCE7Rv1G0458810.1	Coverage	0
chr7R	22829868	22830666	.	-	PGSB	exon	.	ID=SECCE7Rv1G0458820.1.exon.1;Parent=SECCE7Rv1G0458820.1	SECCE7Rv1G0458820.1	0	absent	Chromosome	lo7-cs_q30_rye_filter	SECCE7Rv1G0458820.1	Coverage	0
chr7R	22845879	22847172	.	-	PGSB	exon	.	ID=SECCE7Rv1G0458830.1.exon.1;Parent=SECCE7Rv1G0458830.1	SECCE7Rv1G0458830.1	783	present	Chromosome	lo7-cs_q30_rye_filter	SECCE7Rv1G0458830.1	Coverage	60.5568
chr7R	22984055	22985348	.	-	PGSB	exon	.	ID=SECCE7Rv1G0458840.1.exon.1;Parent=SECCE7Rv1G0458840.1	SECCE7Rv1G0458840.1	400	present	Chromosome	lo7-cs_q30_rye_filter	SECCE7Rv1G0458840.1	Coverage	30.9358
chr7R	23019044	23020337	.	-	PGSB	exon	.	ID=SECCE7Rv1G0458850.1.exon.1;Parent=SECCE7Rv1G0458850.1	SECCE7Rv1G0458850.1	381	present	Chromosome	lo7-cs_q30_rye_filter	SECCE7Rv1G0458850.1	Coverage	29.4664
chr7R	23204317	23205610	.	-	PGSB	exon	.	ID=SECCE7Rv1G0458860.1.exon.1;Parent=SECCE7Rv1G0458860.1	SECCE7Rv1G0458860.1	1243	present	Chromosome	lo7-cs_q30_rye_filter	SECCE7Rv1G0458860.1	Coverage	96.133
chr7R	23312062	23313355	.	-	PGSB	exon	.	ID=SECCE7Rv1G0458870.1.exon.1;Parent=SECCE7Rv1G0458870.1	SECCE7Rv1G0458870.1	1274	present	Chromosome	lo7-cs_q30_rye_filter	SECCE7Rv1G0458870.1	Coverage	98.5305
chr7R	23362359	23362463	.	+	PGSB	exon	.	ID=SECCE7Rv1G0458880.1.exon.1;Parent=SECCE7Rv1G0458880.1	SECCE7Rv1G0458880.1	1161	present	Chromosome	lo7-cs_q30_rye_filter	SECCE7Rv1G0458880.1	Coverage	100
chr7R	23467857	23467943	.	+	PGSB	exon	.	ID=SECCE7Rv1G0458890.1.exon.1;Parent=SECCE7Rv1G0458890.1	SECCE7Rv1G0458890.1	518	present	Chromosome	lo7-cs_q30_rye_filter	SECCE7Rv1G0458890.1	Coverage	39.6024
chr7R	23471441	23471813	.	-	PGSB	exon	.	ID=SECCE7Rv1G0458900.1.exon.1;Parent=SECCE7Rv1G0458900.1	SECCE7Rv1G0458900.1	545	present	Chromosome	lo7-cs_q30_rye_filter	SECCE7Rv1G0458900.1	Coverage	37.6121
chr7R	23475349	23476207	.	-	PGSB	exon	.	ID=SECCE7Rv1G0458910.1.exon.1;Parent=SECCE7Rv1G0458910.1	SECCE7Rv1G0458910.1	858	present	Chromosome	lo7-cs_q30_rye_filter	SECCE7Rv1G0458910.1	Coverage	100
chr7R	23492572	23493436	.	-	PGSB	exon	.	ID=SECCE7Rv1G0458920.1.exon.1;Parent=SECCE7Rv1G0458920.1	SECCE7Rv1G0458920.1	269	present	Chromosome	lo7-cs_q30_rye_filter	SECCE7Rv1G0458920.1	Coverage	31.1343
chr7R	23522408	23523275	.	-	PGSB	exon	.	ID=SECCE7Rv1G0458930.1.exon.1;Parent=SECCE7Rv1G0458930.1	SECCE7Rv1G0458930.1	0	absent	Chromosome	lo7-cs_q30_rye_filter	SECCE7Rv1G0458930.1	Coverage	0
chr7R	23680735	23681596	.	-	PGSB	exon	.	ID=SECCE7Rv1G0458940.1.exon.1;Parent=SECCE7Rv1G0458940.1	SECCE7Rv1G0458940.1	0	absent	Chromosome	lo7-cs_q30_rye_filter	SECCE7Rv1G0458940.1	Coverage	0
chr7R	23717865	23717978	.	+	PGSB	exon	.	ID=SECCE7Rv1G0458950.1.exon.1;Parent=SECCE7Rv1G0458950.1	SECCE7Rv1G0458950.1	0	absent	Chromosome	lo7-cs_q30_rye_filter	SECCE7Rv1G0458950.1	Coverage	0
chr7R	23718915	23721504	.	-	PGSB	exon	.	ID=SECCE7Rv1G0458960.1.exon.1;Parent=SECCE7Rv1G0458960.1	SECCE7Rv1G0458960.1	0	absent	Chromosome	lo7-cs_q30_rye_filter	SECCE7Rv1G0458960.1	Coverage	0
chr7R	23722651	23722660	.	-	PGSB	exon	.	ID=SECCE7Rv1G0458970.1.exon.1;Parent=SECCE7Rv1G0458970.1	SECCE7Rv1G0458970.1	0	absent	Chromosome	lo7-cs_q30_rye_filter	SECCE7Rv1G0458970.1	Coverage	0
chr7R	23792259	23793120	.	-	PGSB	exon	.	ID=SECCE7Rv1G0458980.1.exon.1;Parent=SECCE7Rv1G0458980.1	SECCE7Rv1G0458980.1	0	absent	Chromosome	lo7-cs_q30_rye_filter	SECCE7Rv1G0458980.1	Coverage	0
chr7R	23842583	23843408	.	-	PGSB	exon	.	ID=SECCE7Rv1G0458990.1.exon.1;Parent=SECCE7Rv1G0458990.1	SECCE7Rv1G0458990.1	0	absent	Chromosome	lo7-cs_q30_rye_filter	SECCE7Rv1G0458990.1	Coverage	0
chr7R	23883712	23884579	.	-	PGSB	exon	.	ID=SECCE7Rv1G0459000.1.exon.1;Parent=SECCE7Rv1G0459000.1	SECCE7Rv1G0459000.1	0	absent	Chromosome	lo7-cs_q30_rye_filter	SECCE7Rv1G0459000.1	Coverage	0
chr7R	23931568	23932393	.	-	PGSB	exon	.	ID=SECCE7Rv1G0459010.1.exon.1;Parent=SECCE7Rv1G0459010.1	SECCE7Rv1G0459010.1	0	absent	Chromosome	lo7-cs_q30_rye_filter	SECCE7Rv1G0459010.1	Coverage	0
chr7R	23938771	23939707	.	-	PGSB	exon	.	ID=SECCE7Rv1G0459020.1.exon.1;Parent=SECCE7Rv1G0459020.1	SECCE7Rv1G0459020.1	0	absent	Chromosome	lo7-cs_q30_rye_filter	SECCE7Rv1G0459020.1	Coverage	0
chr7R	23963560	23964427	.	-	PGSB	exon	.	ID=SECCE7Rv1G0459030.1.exon.1;Parent=SECCE7Rv1G0459030.1	SECCE7Rv1G0459030.1	0	absent	Chromosome	lo7-cs_q30_rye_filter	SECCE7Rv1G0459030.1	Coverage	0
chr7R	24129185	24130046	.	-	PGSB	exon	.	ID=SECCE7Rv1G0459040.1.exon.1;Parent=SECCE7Rv1G0459040.1	SECCE7Rv1G0459040.1	0	absent	Chromosome	lo7-cs_q30_rye_filter	SECCE7Rv1G0459040.1	Coverage	0
chr7R	24135645	24136512	.	-	PGSB	exon	.	ID=SECCE7Rv1G0459050.1.exon.1;Parent=SECCE7Rv1G0459050.1	SECCE7Rv1G0459050.1	441	present	Chromosome	lo7-cs_q30_rye_filter	SECCE7Rv1G0459050.1	Coverage	50.8651
chr7R	24162127	24162236	.	-	PGSB	exon	.	ID=SECCE7Rv1G0459060.1.exon.1;Parent=SECCE7Rv1G0459060.1	SECCE7Rv1G0459060.1	0	absent	Chromosome	lo7-cs_q30_rye_filter	SECCE7Rv1G0459060.1	Coverage	0
chr7R	24188125	24188992	.	-	PGSB	exon	.	ID=SECCE7Rv1G0459070.1.exon.1;Parent=SECCE7Rv1G0459070.1	SECCE7Rv1G0459070.1	150	present	Chromosome	lo7-cs_q30_rye_filter	SECCE7Rv1G0459070.1	Coverage	17.301
chr7R	24199951	24200818	.	-	PGSB	exon	.	ID=SECCE7Rv1G0459080.1.exon.1;Parent=SECCE7Rv1G0459080.1	SECCE7Rv1G0459080.1	0	absent	Chromosome	lo7-cs_q30_rye_filter	SECCE7Rv1G0459080.1	Coverage	0
chr7R	24225889	24226225	.	-	PGSB	exon	.	ID=SECCE7Rv1G0459090.1.exon.1;Parent=SECCE7Rv1G0459090.1	SECCE7Rv1G0459090.1	0	absent	Chromosome	lo7-cs_q30_rye_filter	SECCE7Rv1G0459090.1	Coverage	0
chr7R	24269992	24270859	.	-	PGSB	exon	.	ID=SECCE7Rv1G0459100.1.exon.1;Parent=SECCE7Rv1G0459100.1	SECCE7Rv1G0459100.1	867	present	Chromosome	lo7-cs_q30_rye_filter	SECCE7Rv1G0459100.1	Coverage	100
chr7R	24283583	24283967	.	+	PGSB	exon	.	ID=SECCE7Rv1G0459110.1.exon.1;Parent=SECCE7Rv1G0459110.1	SECCE7Rv1G0459110.1	0	absent	Chromosome	lo7-cs_q30_rye_filter	SECCE7Rv1G0459110.1	Coverage	0
chr7R	24417641	24418001	.	+	PGSB	exon	.	ID=SECCE7Rv1G0459120.1.exon.1;Parent=SECCE7Rv1G0459120.1	SECCE7Rv1G0459120.1	0	absent	Chromosome	lo7-cs_q30_rye_filter	SECCE7Rv1G0459120.1	Coverage	0
chr7R	24421481	24422228	.	+	PGSB	exon	.	ID=SECCE7Rv1G0459130.1.exon.1;Parent=SECCE7Rv1G0459130.1	SECCE7Rv1G0459130.1	0	absent	Chromosome	lo7-cs_q30_rye_filter	SECCE7Rv1G0459130.1	Coverage	0
chr7R	24467749	24469558	.	+	PGSB	exon	.	ID=SECCE7Rv1G0459140.1.exon.1;Parent=SECCE7Rv1G0459140.1	SECCE7Rv1G0459140.1	0	absent	Chromosome	lo7-cs_q30_rye_filter	SECCE7Rv1G0459140.1	Coverage	0
chr7R	24535452	24535653	.	+	PGSB	exon	.	ID=SECCE7Rv1G0459150.1.exon.1;Parent=SECCE7Rv1G0459150.1	SECCE7Rv1G0459150.1	0	absent	Chromosome	lo7-cs_q30_rye_filter	SECCE7Rv1G0459150.1	Coverage	0
chr7R	24539876	24542059	.	+	PGSB	exon	.	ID=SECCE7Rv1G0459160.1.exon.1;Parent=SECCE7Rv1G0459160.1	SECCE7Rv1G0459160.1	0	absent	Chromosome	lo7-cs_q30_rye_filter	SECCE7Rv1G0459160.1	Coverage	0
chr7R	24558918	24559071	.	+	PGSB	exon	.	ID=SECCE7Rv1G0459170.1.exon.1;Parent=SECCE7Rv1G0459170.1	SECCE7Rv1G0459170.1	0	absent	Chromosome	lo7-cs_q30_rye_filter	SECCE7Rv1G0459170.1	Coverage	0
chr7R	24613339	24613433	.	+	PGSB	exon	.	ID=SECCE7Rv1G0459180.1.exon.1;Parent=SECCE7Rv1G0459180.1	SECCE7Rv1G0459180.1	210	present	Chromosome	lo7-cs_q30_rye_filter	SECCE7Rv1G0459180.1	Coverage	100
chr7R	24625774	24625845	.	-	PGSB	exon	.	ID=SECCE7Rv1G0459190.1.exon.1;Parent=SECCE7Rv1G0459190.1	SECCE7Rv1G0459190.1	1284	present	Chromosome	lo7-cs_q30_rye_filter	SECCE7Rv1G0459190.1	Coverage	100
chr7R	24782421	24782613	.	+	PGSB	exon	.	ID=SECCE7Rv1G0459200.1.exon.1;Parent=SECCE7Rv1G0459200.1	SECCE7Rv1G0459200.1	5	absent	Chromosome	lo7-cs_q30_rye_filter	SECCE7Rv1G0459200.1	Coverage	2.60417
chr7R	24782757	24782771	.	+	PGSB	exon	.	ID=SECCE7Rv1G0459210.1.exon.1;Parent=SECCE7Rv1G0459210.1	SECCE7Rv1G0459210.1	354	present	Chromosome	lo7-cs_q30_rye_filter	SECCE7Rv1G0459210.1	Coverage	100
chr7R	24889064	24889838	.	+	PGSB	exon	.	ID=SECCE7Rv1G0459220.1.exon.1;Parent=SECCE7Rv1G0459220.1	SECCE7Rv1G0459220.1	0	absent	Chromosome	lo7-cs_q30_rye_filter	SECCE7Rv1G0459220.1	Coverage	0
chr7R	24917864	24917896	.	-	PGSB	exon	.	ID=SECCE7Rv1G0459230.1.exon.1;Parent=SECCE7Rv1G0459230.1	SECCE7Rv1G0459230.1	566	present	Chromosome	lo7-cs_q30_rye_filter	SECCE7Rv1G0459230.1	Coverage	52.5534
chr7R	24931034	24931742	.	-	PGSB	exon	.	ID=SECCE7Rv1G0459240.1.exon.1;Parent=SECCE7Rv1G0459240.1	SECCE7Rv1G0459240.1	651	present	Chromosome	lo7-cs_q30_rye_filter	SECCE7Rv1G0459240.1	Coverage	63.4503
chr7R	24978740	24979034	.	-	PGSB	exon	.	ID=SECCE7Rv1G0459250.1.exon.1;Parent=SECCE7Rv1G0459250.1	SECCE7Rv1G0459250.1	2456	present	Chromosome	lo7-cs_q30_rye_filter	SECCE7Rv1G0459250.1	Coverage	98.6345
chr7R	24983421	24983436	.	-	PGSB	exon	.	ID=SECCE7Rv1G0459260.1.exon.1;Parent=SECCE7Rv1G0459260.1	SECCE7Rv1G0459260.1	360	present	Chromosome	lo7-cs_q30_rye_filter	SECCE7Rv1G0459260.1	Coverage	100
chr7R	25021719	25022617	.	+	PGSB	exon	.	ID=SECCE7Rv1G0459270.1.exon.1;Parent=SECCE7Rv1G0459270.1	SECCE7Rv1G0459270.1	2506	present	Chromosome	lo7-cs_q30_rye_filter	SECCE7Rv1G0459270.1	Coverage	88.7708
chr7R	25052535	25052904	.	-	PGSB	exon	.	ID=SECCE7Rv1G0459280.1.exon.1;Parent=SECCE7Rv1G0459280.1	SECCE7Rv1G0459280.1	369	present	Chromosome	lo7-cs_q30_rye_filter	SECCE7Rv1G0459280.1	Coverage	100
chr7R	25052963	25053341	.	-	PGSB	exon	.	ID=SECCE7Rv1G0459290.1.exon.1;Parent=SECCE7Rv1G0459290.1	SECCE7Rv1G0459290.1	378	present	Chromosome	lo7-cs_q30_rye_filter	SECCE7Rv1G0459290.1	Coverage	100
chr7R	25068300	25068360	.	+	PGSB	exon	.	ID=SECCE7Rv1G0459300.1.exon.1;Parent=SECCE7Rv1G0459300.1	SECCE7Rv1G0459300.1	89	present	Chromosome	lo7-cs_q30_rye_filter	SECCE7Rv1G0459300.1	Coverage	38.5281
chr7R	25144971	25145226	.	-	PGSB	exon	.	ID=SECCE7Rv1G0459310.1.exon.1;Parent=SECCE7Rv1G0459310.1	SECCE7Rv1G0459310.1	0	absent	Chromosome	lo7-cs_q30_rye_filter	SECCE7Rv1G0459310.1	Coverage	0
chr7R	25155910	25156147	.	+	PGSB	exon	.	ID=SECCE7Rv1G0459320.1.exon.1;Parent=SECCE7Rv1G0459320.1	SECCE7Rv1G0459320.1	0	absent	Chromosome	lo7-cs_q30_rye_filter	SECCE7Rv1G0459320.1	Coverage	0
chr7R	25265366	25265603	.	+	PGSB	exon	.	ID=SECCE7Rv1G0459330.1.exon.1;Parent=SECCE7Rv1G0459330.1	SECCE7Rv1G0459330.1	0	absent	Chromosome	lo7-cs_q30_rye_filter	SECCE7Rv1G0459330.1	Coverage	0
chr7R	25315845	25317291	.	-	PGSB	exon	.	ID=SECCE7Rv1G0459340.1.exon.1;Parent=SECCE7Rv1G0459340.1	SECCE7Rv1G0459340.1	1446	present	Chromosome	lo7-cs_q30_rye_filter	SECCE7Rv1G0459340.1	Coverage	100
chr7R	25337450	25337687	.	+	PGSB	exon	.	ID=SECCE7Rv1G0459350.1.exon.1;Parent=SECCE7Rv1G0459350.1	SECCE7Rv1G0459350.1	237	present	Chromosome	lo7-cs_q30_rye_filter	SECCE7Rv1G0459350.1	Coverage	100
chr7R	25382497	25382770	.	-	PGSB	exon	.	ID=SECCE7Rv1G0459360.1.exon.1;Parent=SECCE7Rv1G0459360.1	SECCE7Rv1G0459360.1	273	present	Chromosome	lo7-cs_q30_rye_filter	SECCE7Rv1G0459360.1	Coverage	100
chr7R	25393907	25395179	.	-	PGSB	exon	.	ID=SECCE7Rv1G0459370.1.exon.1;Parent=SECCE7Rv1G0459370.1	SECCE7Rv1G0459370.1	1272	present	Chromosome	lo7-cs_q30_rye_filter	SECCE7Rv1G0459370.1	Coverage	100
chr7R	25402286	25403442	.	+	PGSB	exon	.	ID=SECCE7Rv1G0459380.1.exon.1;Parent=SECCE7Rv1G0459380.1	SECCE7Rv1G0459380.1	1156	present	Chromosome	lo7-cs_q30_rye_filter	SECCE7Rv1G0459380.1	Coverage	96.5748
chr7R	25462675	25463635	.	+	PGSB	exon	.	ID=SECCE7Rv1G0459390.1.exon.1;Parent=SECCE7Rv1G0459390.1	SECCE7Rv1G0459390.1	0	absent	Chromosome	lo7-cs_q30_rye_filter	SECCE7Rv1G0459390.1	Coverage	0
chr7R	25513772	25514732	.	+	PGSB	exon	.	ID=SECCE7Rv1G0459400.1.exon.1;Parent=SECCE7Rv1G0459400.1	SECCE7Rv1G0459400.1	0	absent	Chromosome	lo7-cs_q30_rye_filter	SECCE7Rv1G0459400.1	Coverage	0
chr7R	25542998	25543958	.	+	PGSB	exon	.	ID=SECCE7Rv1G0459410.1.exon.1;Parent=SECCE7Rv1G0459410.1	SECCE7Rv1G0459410.1	0	absent	Chromosome	lo7-cs_q30_rye_filter	SECCE7Rv1G0459410.1	Coverage	0
chr7R	25553008	25553329	.	-	PGSB	exon	.	ID=SECCE7Rv1G0459420.1.exon.1;Parent=SECCE7Rv1G0459420.1	SECCE7Rv1G0459420.1	0	absent	Chromosome	lo7-cs_q30_rye_filter	SECCE7Rv1G0459420.1	Coverage	0
chr7R	25574036	25574996	.	+	PGSB	exon	.	ID=SECCE7Rv1G0459430.1.exon.1;Parent=SECCE7Rv1G0459430.1	SECCE7Rv1G0459430.1	0	absent	Chromosome	lo7-cs_q30_rye_filter	SECCE7Rv1G0459430.1	Coverage	0
chr7R	25936785	25937226	.	+	PGSB	exon	.	ID=SECCE7Rv1G0459440.1.exon.1;Parent=SECCE7Rv1G0459440.1	SECCE7Rv1G0459440.1	0	absent	Chromosome	lo7-cs_q30_rye_filter	SECCE7Rv1G0459440.1	Coverage	0
chr7R	25943317	25944010	.	-	PGSB	exon	.	ID=SECCE7Rv1G0459450.1.exon.1;Parent=SECCE7Rv1G0459450.1	SECCE7Rv1G0459450.1	0	absent	Chromosome	lo7-cs_q30_rye_filter	SECCE7Rv1G0459450.1	Coverage	0
chr7R	25963296	25964019	.	+	PGSB	exon	.	ID=SECCE7Rv1G0459460.1.exon.1;Parent=SECCE7Rv1G0459460.1	SECCE7Rv1G0459460.1	0	absent	Chromosome	lo7-cs_q30_rye_filter	SECCE7Rv1G0459460.1	Coverage	0
chr7R	26025001	26026738	.	+	PGSB	exon	.	ID=SECCE7Rv1G0459470.1.exon.1;Parent=SECCE7Rv1G0459470.1	SECCE7Rv1G0459470.1	0	absent	Chromosome	lo7-cs_q30_rye_filter	SECCE7Rv1G0459470.1	Coverage	0
chr7R	26029387	26030101	.	+	PGSB	exon	.	ID=SECCE7Rv1G0459480.1.exon.1;Parent=SECCE7Rv1G0459480.1	SECCE7Rv1G0459480.1	287	present	Chromosome	lo7-cs_q30_rye_filter	SECCE7Rv1G0459480.1	Coverage	40.1961
chr7R	26075277	26075955	.	-	PGSB	exon	.	ID=SECCE7Rv1G0459490.1.exon.1;Parent=SECCE7Rv1G0459490.1	SECCE7Rv1G0459490.1	600	present	Chromosome	lo7-cs_q30_rye_filter	SECCE7Rv1G0459490.1	Coverage	88.4956
chr7R	26095481	26096204	.	+	PGSB	exon	.	ID=SECCE7Rv1G0459500.1.exon.1;Parent=SECCE7Rv1G0459500.1	SECCE7Rv1G0459500.1	0	absent	Chromosome	lo7-cs_q30_rye_filter	SECCE7Rv1G0459500.1	Coverage	0
chr7R	26129461	26129794	.	-	PGSB	exon	.	ID=SECCE7Rv1G0459510.1.exon.1;Parent=SECCE7Rv1G0459510.1	SECCE7Rv1G0459510.1	492	present	Chromosome	lo7-cs_q30_rye_filter	SECCE7Rv1G0459510.1	Coverage	93.7143
chr7R	26345468	26345549	.	-	PGSB	exon	.	ID=SECCE7Rv1G0459520.1.exon.1;Parent=SECCE7Rv1G0459520.1	SECCE7Rv1G0459520.1	646	present	Chromosome	lo7-cs_q30_rye_filter	SECCE7Rv1G0459520.1	Coverage	96.562
chr7R	26425041	26425358	.	+	PGSB	exon	.	ID=SECCE7Rv1G0459530.1.exon.1;Parent=SECCE7Rv1G0459530.1	SECCE7Rv1G0459530.1	317	present	Chromosome	lo7-cs_q30_rye_filter	SECCE7Rv1G0459530.1	Coverage	100
chr7R	26463988	26464585	.	-	PGSB	exon	.	ID=SECCE7Rv1G0459540.1.exon.1;Parent=SECCE7Rv1G0459540.1	SECCE7Rv1G0459540.1	597	present	Chromosome	lo7-cs_q30_rye_filter	SECCE7Rv1G0459540.1	Coverage	100
chr7R	26468364	26469192	.	-	PGSB	exon	.	ID=SECCE7Rv1G0459550.1.exon.1;Parent=SECCE7Rv1G0459550.1	SECCE7Rv1G0459550.1	1834	present	Chromosome	lo7-cs_q30_rye_filter	SECCE7Rv1G0459550.1	Coverage	99.2424
chr7R	26475159	26475916	.	-	PGSB	exon	.	ID=SECCE7Rv1G0459560.1.exon.1;Parent=SECCE7Rv1G0459560.1	SECCE7Rv1G0459560.1	0	absent	Chromosome	lo7-cs_q30_rye_filter	SECCE7Rv1G0459560.1	Coverage	0
chr7R	26502232	26503033	.	-	PGSB	exon	.	ID=SECCE7Rv1G0459570.1.exon.1;Parent=SECCE7Rv1G0459570.1	SECCE7Rv1G0459570.1	0	absent	Chromosome	lo7-cs_q30_rye_filter	SECCE7Rv1G0459570.1	Coverage	0
chr7R	26506594	26507404	.	-	PGSB	exon	.	ID=SECCE7Rv1G0459580.1.exon.1;Parent=SECCE7Rv1G0459580.1	SECCE7Rv1G0459580.1	0	absent	Chromosome	lo7-cs_q30_rye_filter	SECCE7Rv1G0459580.1	Coverage	0
chr7R	26511168	26511972	.	-	PGSB	exon	.	ID=SECCE7Rv1G0459590.1.exon.1;Parent=SECCE7Rv1G0459590.1	SECCE7Rv1G0459590.1	558	present	Chromosome	lo7-cs_q30_rye_filter	SECCE7Rv1G0459590.1	Coverage	26.7241
chr7R	26537765	26538587	.	-	PGSB	exon	.	ID=SECCE7Rv1G0459600.1.exon.1;Parent=SECCE7Rv1G0459600.1	SECCE7Rv1G0459600.1	672	present	Chromosome	lo7-cs_q30_rye_filter	SECCE7Rv1G0459600.1	Coverage	44.9799
chr7R	26541059	26541484	.	+	PGSB	exon	.	ID=SECCE7Rv1G0459610.1.exon.1;Parent=SECCE7Rv1G0459610.1	SECCE7Rv1G0459610.1	0	absent	Chromosome	lo7-cs_q30_rye_filter	SECCE7Rv1G0459610.1	Coverage	0
chr7R	26579350	26580151	.	-	PGSB	exon	.	ID=SECCE7Rv1G0459620.1.exon.1;Parent=SECCE7Rv1G0459620.1	SECCE7Rv1G0459620.1	801	present	Chromosome	lo7-cs_q30_rye_filter	SECCE7Rv1G0459620.1	Coverage	100
chr7R	26583591	26584401	.	-	PGSB	exon	.	ID=SECCE7Rv1G0459630.1.exon.1;Parent=SECCE7Rv1G0459630.1	SECCE7Rv1G0459630.1	1861	present	Chromosome	lo7-cs_q30_rye_filter	SECCE7Rv1G0459630.1	Coverage	99.572
chr7R	26588189	26588987	.	-	PGSB	exon	.	ID=SECCE7Rv1G0459640.1.exon.1;Parent=SECCE7Rv1G0459640.1	SECCE7Rv1G0459640.1	817	present	Chromosome	lo7-cs_q30_rye_filter	SECCE7Rv1G0459640.1	Coverage	35.1852
chr7R	26676644	26677466	.	-	PGSB	exon	.	ID=SECCE7Rv1G0459650.1.exon.1;Parent=SECCE7Rv1G0459650.1	SECCE7Rv1G0459650.1	1506	present	Chromosome	lo7-cs_q30_rye_filter	SECCE7Rv1G0459650.1	Coverage	100
chr7R	26682091	26682862	.	-	PGSB	exon	.	ID=SECCE7Rv1G0459660.1.exon.1;Parent=SECCE7Rv1G0459660.1	SECCE7Rv1G0459660.1	1995	present	Chromosome	lo7-cs_q30_rye_filter	SECCE7Rv1G0459660.1	Coverage	100
chr7R	26714918	26715318	.	-	PGSB	exon	.	ID=SECCE7Rv1G0459670.1.exon.1;Parent=SECCE7Rv1G0459670.1	SECCE7Rv1G0459670.1	176	present	Chromosome	lo7-cs_q30_rye_filter	SECCE7Rv1G0459670.1	Coverage	19.1097
chr7R	26749896	26750296	.	-	PGSB	exon	.	ID=SECCE7Rv1G0459680.1.exon.1;Parent=SECCE7Rv1G0459680.1	SECCE7Rv1G0459680.1	167	present	Chromosome	lo7-cs_q30_rye_filter	SECCE7Rv1G0459680.1	Coverage	18.1325
chr7R	26778815	26779817	.	-	PGSB	exon	.	ID=SECCE7Rv1G0459690.1.exon.1;Parent=SECCE7Rv1G0459690.1	SECCE7Rv1G0459690.1	1710	present	Chromosome	lo7-cs_q30_rye_filter	SECCE7Rv1G0459690.1	Coverage	92.8339
chr7R	26816055	26816880	.	-	PGSB	exon	.	ID=SECCE7Rv1G0459700.1.exon.1;Parent=SECCE7Rv1G0459700.1	SECCE7Rv1G0459700.1	1480	present	Chromosome	lo7-cs_q30_rye_filter	SECCE7Rv1G0459700.1	Coverage	76.9631
chr7R	26822144	26822954	.	-	PGSB	exon	.	ID=SECCE7Rv1G0459710.1.exon.1;Parent=SECCE7Rv1G0459710.1	SECCE7Rv1G0459710.1	1516	present	Chromosome	lo7-cs_q30_rye_filter	SECCE7Rv1G0459710.1	Coverage	92.5519
chr7R	26926907	26928716	.	-	PGSB	exon	.	ID=SECCE7Rv1G0459720.1.exon.1;Parent=SECCE7Rv1G0459720.1	SECCE7Rv1G0459720.1	1429	present	Chromosome	lo7-cs_q30_rye_filter	SECCE7Rv1G0459720.1	Coverage	78.9939
chr7R	26934894	26935680	.	-	PGSB	exon	.	ID=SECCE7Rv1G0459730.1.exon.1;Parent=SECCE7Rv1G0459730.1	SECCE7Rv1G0459730.1	1368	present	Chromosome	lo7-cs_q30_rye_filter	SECCE7Rv1G0459730.1	Coverage	86.3636
chr7R	26942125	26943616	.	-	PGSB	exon	.	ID=SECCE7Rv1G0459740.1.exon.1;Parent=SECCE7Rv1G0459740.1	SECCE7Rv1G0459740.1	2304	present	Chromosome	lo7-cs_q30_rye_filter	SECCE7Rv1G0459740.1	Coverage	100
chr7R	27045188	27045959	.	-	PGSB	exon	.	ID=SECCE7Rv1G0459750.1.exon.1;Parent=SECCE7Rv1G0459750.1	SECCE7Rv1G0459750.1	1197	present	Chromosome	lo7-cs_q30_rye_filter	SECCE7Rv1G0459750.1	Coverage	76.5835
chr7R	27051996	27053277	.	-	PGSB	exon	.	ID=SECCE7Rv1G0459760.1.exon.1;Parent=SECCE7Rv1G0459760.1	SECCE7Rv1G0459760.1	1320	present	Chromosome	lo7-cs_q30_rye_filter	SECCE7Rv1G0459760.1	Coverage	52.1945
chr7R	27063415	27064186	.	-	PGSB	exon	.	ID=SECCE7Rv1G0459770.1.exon.1;Parent=SECCE7Rv1G0459770.1	SECCE7Rv1G0459770.1	1087	present	Chromosome	lo7-cs_q30_rye_filter	SECCE7Rv1G0459770.1	Coverage	66.7281
chr7R	27066115	27066197	.	-	PGSB	exon	.	ID=SECCE7Rv1G0459780.1.exon.1;Parent=SECCE7Rv1G0459780.1	SECCE7Rv1G0459780.1	0	absent	Chromosome	lo7-cs_q30_rye_filter	SECCE7Rv1G0459780.1	Coverage	0
chr7R	27137610	27138303	.	+	PGSB	exon	.	ID=SECCE7Rv1G0459790.1.exon.1;Parent=SECCE7Rv1G0459790.1	SECCE7Rv1G0459790.1	871	present	Chromosome	lo7-cs_q30_rye_filter	SECCE7Rv1G0459790.1	Coverage	54.3695
chr7R	27140974	27143077	.	-	PGSB	exon	.	ID=SECCE7Rv1G0459800.1.exon.1;Parent=SECCE7Rv1G0459800.1	SECCE7Rv1G0459800.1	584	present	Chromosome	lo7-cs_q30_rye_filter	SECCE7Rv1G0459800.1	Coverage	27.7699
chr7R	27144689	27144899	.	+	PGSB	exon	.	ID=SECCE7Rv1G0459810.1.exon.1;Parent=SECCE7Rv1G0459810.1	SECCE7Rv1G0459810.1	0	absent	Chromosome	lo7-cs_q30_rye_filter	SECCE7Rv1G0459810.1	Coverage	0
chr7R	27188702	27189122	.	+	PGSB	exon	.	ID=SECCE7Rv1G0459820.1.exon.1;Parent=SECCE7Rv1G0459820.1	SECCE7Rv1G0459820.1	1041	present	Chromosome	lo7-cs_q30_rye_filter	SECCE7Rv1G0459820.1	Coverage	100
chr7R	27344285	27344393	.	-	PGSB	exon	.	ID=SECCE7Rv1G0459830.1.exon.1;Parent=SECCE7Rv1G0459830.1	SECCE7Rv1G0459830.1	228	present	Chromosome	lo7-cs_q30_rye_filter	SECCE7Rv1G0459830.1	Coverage	100
chr7R	27354174	27354270	.	-	PGSB	exon	.	ID=SECCE7Rv1G0459840.1.exon.1;Parent=SECCE7Rv1G0459840.1	SECCE7Rv1G0459840.1	3232	present	Chromosome	lo7-cs_q30_rye_filter	SECCE7Rv1G0459840.1	Coverage	51.7949
chr7R	27556666	27557481	.	+	PGSB	exon	.	ID=SECCE7Rv1G0459850.1.exon.1;Parent=SECCE7Rv1G0459850.1	SECCE7Rv1G0459850.1	2467	present	Chromosome	lo7-cs_q30_rye_filter	SECCE7Rv1G0459850.1	Coverage	85.749
chr7R	27560886	27560916	.	-	PGSB	exon	.	ID=SECCE7Rv1G0459860.1.exon.1;Parent=SECCE7Rv1G0459860.1	SECCE7Rv1G0459860.1	496	present	Chromosome	lo7-cs_q30_rye_filter	SECCE7Rv1G0459860.1	Coverage	84.7863
chr7R	27590120	27590696	.	-	PGSB	exon	.	ID=SECCE7Rv1G0459870.1.exon.1;Parent=SECCE7Rv1G0459870.1	SECCE7Rv1G0459870.1	1120	present	Chromosome	lo7-cs_q30_rye_filter	SECCE7Rv1G0459870.1	Coverage	72.3514
chr7R	27682505	27682792	.	-	PGSB	exon	.	ID=SECCE7Rv1G0459880.1.exon.1;Parent=SECCE7Rv1G0459880.1	SECCE7Rv1G0459880.1	363	present	Chromosome	lo7-cs_q30_rye_filter	SECCE7Rv1G0459880.1	Coverage	100
chr7R	27697249	27698596	.	+	PGSB	exon	.	ID=SECCE7Rv1G0459890.1.exon.1;Parent=SECCE7Rv1G0459890.1	SECCE7Rv1G0459890.1	1347	present	Chromosome	lo7-cs_q30_rye_filter	SECCE7Rv1G0459890.1	Coverage	100
chr7R	27811359	27812730	.	+	PGSB	exon	.	ID=SECCE7Rv1G0459900.1.exon.1;Parent=SECCE7Rv1G0459900.1	SECCE7Rv1G0459900.1	222	present	Chromosome	lo7-cs_q30_rye_filter	SECCE7Rv1G0459900.1	Coverage	16.1926
chr7R	27846111	27846164	.	-	PGSB	exon	.	ID=SECCE7Rv1G0459910.1.exon.1;Parent=SECCE7Rv1G0459910.1	SECCE7Rv1G0459910.1	0	absent	Chromosome	lo7-cs_q30_rye_filter	SECCE7Rv1G0459910.1	Coverage	0
chr7R	27883511	27883564	.	-	PGSB	exon	.	ID=SECCE7Rv1G0459920.1.exon.1;Parent=SECCE7Rv1G0459920.1	SECCE7Rv1G0459920.1	0	absent	Chromosome	lo7-cs_q30_rye_filter	SECCE7Rv1G0459920.1	Coverage	0
chr7R	27920451	27920504	.	-	PGSB	exon	.	ID=SECCE7Rv1G0459930.1.exon.1;Parent=SECCE7Rv1G0459930.1	SECCE7Rv1G0459930.1	0	absent	Chromosome	lo7-cs_q30_rye_filter	SECCE7Rv1G0459930.1	Coverage	0
chr7R	28178137	28179499	.	+	PGSB	exon	.	ID=SECCE7Rv1G0459940.1.exon.1;Parent=SECCE7Rv1G0459940.1	SECCE7Rv1G0459940.1	1362	present	Chromosome	lo7-cs_q30_rye_filter	SECCE7Rv1G0459940.1	Coverage	100
chr7R	28202271	28202469	.	-	PGSB	exon	.	ID=SECCE7Rv1G0459950.1.exon.1;Parent=SECCE7Rv1G0459950.1	SECCE7Rv1G0459950.1	0	absent	Chromosome	lo7-cs_q30_rye_filter	SECCE7Rv1G0459950.1	Coverage	0
chr7R	28238414	28238855	.	-	PGSB	exon	.	ID=SECCE7Rv1G0459960.1.exon.1;Parent=SECCE7Rv1G0459960.1	SECCE7Rv1G0459960.1	0	absent	Chromosome	lo7-cs_q30_rye_filter	SECCE7Rv1G0459960.1	Coverage	0
chr7R	28242432	28242879	.	-	PGSB	exon	.	ID=SECCE7Rv1G0459970.1.exon.1;Parent=SECCE7Rv1G0459970.1	SECCE7Rv1G0459970.1	378	present	Chromosome	lo7-cs_q30_rye_filter	SECCE7Rv1G0459970.1	Coverage	84.5638
chr7R	28246285	28247210	.	+	PGSB	exon	.	ID=SECCE7Rv1G0459980.1.exon.1;Parent=SECCE7Rv1G0459980.1	SECCE7Rv1G0459980.1	1141	present	Chromosome	lo7-cs_q30_rye_filter	SECCE7Rv1G0459980.1	Coverage	50.0439
chr7R	28250960	28251909	.	+	PGSB	exon	.	ID=SECCE7Rv1G0459990.1.exon.1;Parent=SECCE7Rv1G0459990.1	SECCE7Rv1G0459990.1	2102	present	Chromosome	lo7-cs_q30_rye_filter	SECCE7Rv1G0459990.1	Coverage	90.9957
chr7R	28255091	28256037	.	+	PGSB	exon	.	ID=SECCE7Rv1G0460000.1.exon.1;Parent=SECCE7Rv1G0460000.1	SECCE7Rv1G0460000.1	1372	present	Chromosome	lo7-cs_q30_rye_filter	SECCE7Rv1G0460000.1	Coverage	59.4712
chr7R	28263109	28263490	.	+	PGSB	exon	.	ID=SECCE7Rv1G0460010.1.exon.1;Parent=SECCE7Rv1G0460010.1	SECCE7Rv1G0460010.1	71	present	Chromosome	lo7-cs_q30_rye_filter	SECCE7Rv1G0460010.1	Coverage	18.4896
chr7R	28610972	28611407	.	+	PGSB	exon	.	ID=SECCE7Rv1G0460020.1.exon.1;Parent=SECCE7Rv1G0460020.1	SECCE7Rv1G0460020.1	460	present	Chromosome	lo7-cs_q30_rye_filter	SECCE7Rv1G0460020.1	Coverage	43.5606
chr7R	28731116	28731551	.	+	PGSB	exon	.	ID=SECCE7Rv1G0460030.1.exon.1;Parent=SECCE7Rv1G0460030.1	SECCE7Rv1G0460030.1	0	absent	Chromosome	lo7-cs_q30_rye_filter	SECCE7Rv1G0460030.1	Coverage	0
chr7R	28791451	28791886	.	+	PGSB	exon	.	ID=SECCE7Rv1G0460040.1.exon.1;Parent=SECCE7Rv1G0460040.1	SECCE7Rv1G0460040.1	384	present	Chromosome	lo7-cs_q30_rye_filter	SECCE7Rv1G0460040.1	Coverage	36.3636
chr7R	29003447	29003882	.	+	PGSB	exon	.	ID=SECCE7Rv1G0460050.1.exon.1;Parent=SECCE7Rv1G0460050.1	SECCE7Rv1G0460050.1	1056	present	Chromosome	lo7-cs_q30_rye_filter	SECCE7Rv1G0460050.1	Coverage	100
chr7R	29109871	29110306	.	+	PGSB	exon	.	ID=SECCE7Rv1G0460060.1.exon.1;Parent=SECCE7Rv1G0460060.1	SECCE7Rv1G0460060.1	0	absent	Chromosome	lo7-cs_q30_rye_filter	SECCE7Rv1G0460060.1	Coverage	0
chr7R	29128206	29128889	.	+	PGSB	exon	.	ID=SECCE7Rv1G0460070.1.exon.1;Parent=SECCE7Rv1G0460070.1	SECCE7Rv1G0460070.1	217	present	Chromosome	lo7-cs_q30_rye_filter	SECCE7Rv1G0460070.1	Coverage	20.7854
chr7R	29138434	29138869	.	+	PGSB	exon	.	ID=SECCE7Rv1G0460080.1.exon.1;Parent=SECCE7Rv1G0460080.1	SECCE7Rv1G0460080.1	0	absent	Chromosome	lo7-cs_q30_rye_filter	SECCE7Rv1G0460080.1	Coverage	0
chr7R	29250298	29250733	.	+	PGSB	exon	.	ID=SECCE7Rv1G0460090.1.exon.1;Parent=SECCE7Rv1G0460090.1	SECCE7Rv1G0460090.1	1017	present	Chromosome	lo7-cs_q30_rye_filter	SECCE7Rv1G0460090.1	Coverage	96.3068
chr7R	29313928	29314841	.	+	PGSB	exon	.	ID=SECCE7Rv1G0460100.1.exon.1;Parent=SECCE7Rv1G0460100.1	SECCE7Rv1G0460100.1	1443	present	Chromosome	lo7-cs_q30_rye_filter	SECCE7Rv1G0460100.1	Coverage	100
chr7R	29316343	29317102	.	+	PGSB	exon	.	ID=SECCE7Rv1G0460110.1.exon.1;Parent=SECCE7Rv1G0460110.1	SECCE7Rv1G0460110.1	95	present	Chromosome	lo7-cs_q30_rye_filter	SECCE7Rv1G0460110.1	Coverage	12.5165
chr7R	29359459	29360384	.	+	PGSB	exon	.	ID=SECCE7Rv1G0460120.1.exon.1;Parent=SECCE7Rv1G0460120.1	SECCE7Rv1G0460120.1	857	present	Chromosome	lo7-cs_q30_rye_filter	SECCE7Rv1G0460120.1	Coverage	37.5877
chr7R	29387678	29387918	.	-	PGSB	exon	.	ID=SECCE7Rv1G0460130.1.exon.1;Parent=SECCE7Rv1G0460130.1	SECCE7Rv1G0460130.1	202	present	Chromosome	lo7-cs_q30_rye_filter	SECCE7Rv1G0460130.1	Coverage	84.1667
chr7R	29402179	29402548	.	+	PGSB	exon	.	ID=SECCE7Rv1G0460140.1.exon.1;Parent=SECCE7Rv1G0460140.1	SECCE7Rv1G0460140.1	0	absent	Chromosome	lo7-cs_q30_rye_filter	SECCE7Rv1G0460140.1	Coverage	0
chr7R	29444688	29445132	.	+	PGSB	exon	.	ID=SECCE7Rv1G0460150.1.exon.1;Parent=SECCE7Rv1G0460150.1	SECCE7Rv1G0460150.1	907	present	Chromosome	lo7-cs_q30_rye_filter	SECCE7Rv1G0460150.1	Coverage	85.6468
chr7R	29633875	29634292	.	-	PGSB	exon	.	ID=SECCE7Rv1G0460160.1.exon.1;Parent=SECCE7Rv1G0460160.1	SECCE7Rv1G0460160.1	921	present	Chromosome	lo7-cs_q30_rye_filter	SECCE7Rv1G0460160.1	Coverage	100
chr7R	29635128	29635353	.	-	PGSB	exon	.	ID=SECCE7Rv1G0460170.1.exon.1;Parent=SECCE7Rv1G0460170.1	SECCE7Rv1G0460170.1	225	present	Chromosome	lo7-cs_q30_rye_filter	SECCE7Rv1G0460170.1	Coverage	100
chr7R	29790335	29790341	.	+	PGSB	exon	.	ID=SECCE7Rv1G0460180.1.exon.1;Parent=SECCE7Rv1G0460180.1	SECCE7Rv1G0460180.1	0	absent	Chromosome	lo7-cs_q30_rye_filter	SECCE7Rv1G0460180.1	Coverage	0
chr7R	30109974	30110217	.	-	PGSB	exon	.	ID=SECCE7Rv1G0460190.1.exon.1;Parent=SECCE7Rv1G0460190.1	SECCE7Rv1G0460190.1	1464	present	Chromosome	lo7-cs_q30_rye_filter	SECCE7Rv1G0460190.1	Coverage	52.8711
chr7R	30224156	30224597	.	+	PGSB	exon	.	ID=SECCE7Rv1G0460200.1.exon.1;Parent=SECCE7Rv1G0460200.1	SECCE7Rv1G0460200.1	0	absent	Chromosome	lo7-cs_q30_rye_filter	SECCE7Rv1G0460200.1	Coverage	0
chr7R	30307951	30307966	.	-	PGSB	exon	.	ID=SECCE7Rv1G0460210.1.exon.1;Parent=SECCE7Rv1G0460210.1	SECCE7Rv1G0460210.1	0	absent	Chromosome	lo7-cs_q30_rye_filter	SECCE7Rv1G0460210.1	Coverage	0
chr7R	30607706	30607774	.	+	PGSB	exon	.	ID=SECCE7Rv1G0460220.1.exon.1;Parent=SECCE7Rv1G0460220.1	SECCE7Rv1G0460220.1	1358	present	Chromosome	lo7-cs_q30_rye_filter	SECCE7Rv1G0460220.1	Coverage	84.9281
chr7R	30620231	30622205	.	-	PGSB	exon	.	ID=SECCE7Rv1G0460230.1.exon.1;Parent=SECCE7Rv1G0460230.1	SECCE7Rv1G0460230.1	1974	present	Chromosome	lo7-cs_q30_rye_filter	SECCE7Rv1G0460230.1	Coverage	100
chr7R	30675422	30677402	.	-	PGSB	exon	.	ID=SECCE7Rv1G0460240.1.exon.1;Parent=SECCE7Rv1G0460240.1	SECCE7Rv1G0460240.1	1980	present	Chromosome	lo7-cs_q30_rye_filter	SECCE7Rv1G0460240.1	Coverage	100
chr7R	30684488	30684704	.	-	PGSB	exon	.	ID=SECCE7Rv1G0460250.1.exon.1;Parent=SECCE7Rv1G0460250.1	SECCE7Rv1G0460250.1	1311	present	Chromosome	lo7-cs_q30_rye_filter	SECCE7Rv1G0460250.1	Coverage	83.2381
chr7R	30711278	30711325	.	-	PGSB	exon	.	ID=SECCE7Rv1G0460260.1.exon.1;Parent=SECCE7Rv1G0460260.1	SECCE7Rv1G0460260.1	0	absent	Chromosome	lo7-cs_q30_rye_filter	SECCE7Rv1G0460260.1	Coverage	0
chr7R	30765451	30767434	.	+	PGSB	exon	.	ID=SECCE7Rv1G0460270.1.exon.1;Parent=SECCE7Rv1G0460270.1	SECCE7Rv1G0460270.1	0	absent	Chromosome	lo7-cs_q30_rye_filter	SECCE7Rv1G0460270.1	Coverage	0
chr7R	30825475	30825596	.	+	PGSB	exon	.	ID=SECCE7Rv1G0460280.1.exon.1;Parent=SECCE7Rv1G0460280.1	SECCE7Rv1G0460280.1	434	present	Chromosome	lo7-cs_q30_rye_filter	SECCE7Rv1G0460280.1	Coverage	73.8095
chr7R	30830497	30830581	.	+	PGSB	exon	.	ID=SECCE7Rv1G0460290.1.exon.1;Parent=SECCE7Rv1G0460290.1	SECCE7Rv1G0460290.1	424	present	Chromosome	lo7-cs_q30_rye_filter	SECCE7Rv1G0460290.1	Coverage	64.5358
chr7R	30832610	30834590	.	-	PGSB	exon	.	ID=SECCE7Rv1G0460300.1.exon.1;Parent=SECCE7Rv1G0460300.1	SECCE7Rv1G0460300.1	1980	present	Chromosome	lo7-cs_q30_rye_filter	SECCE7Rv1G0460300.1	Coverage	100
chr7R	30906114	30907338	.	-	PGSB	exon	.	ID=SECCE7Rv1G0460310.1.exon.1;Parent=SECCE7Rv1G0460310.1	SECCE7Rv1G0460310.1	1224	present	Chromosome	lo7-cs_q30_rye_filter	SECCE7Rv1G0460310.1	Coverage	100
chr7R	30927977	30928062	.	-	PGSB	exon	.	ID=SECCE7Rv1G0460320.1.exon.1;Parent=SECCE7Rv1G0460320.1	SECCE7Rv1G0460320.1	0	absent	Chromosome	lo7-cs_q30_rye_filter	SECCE7Rv1G0460320.1	Coverage	0
chr7R	30929479	30929535	.	-	PGSB	exon	.	ID=SECCE7Rv1G0460330.1.exon.1;Parent=SECCE7Rv1G0460330.1	SECCE7Rv1G0460330.1	0	absent	Chromosome	lo7-cs_q30_rye_filter	SECCE7Rv1G0460330.1	Coverage	0
chr7R	31067798	31067875	.	-	PGSB	exon	.	ID=SECCE7Rv1G0460340.1.exon.1;Parent=SECCE7Rv1G0460340.1	SECCE7Rv1G0460340.1	345	present	Chromosome	lo7-cs_q30_rye_filter	SECCE7Rv1G0460340.1	Coverage	100
chr7R	31085876	31086370	.	-	PGSB	exon	.	ID=SECCE7Rv1G0460350.1.exon.1;Parent=SECCE7Rv1G0460350.1	SECCE7Rv1G0460350.1	934	present	Chromosome	lo7-cs_q30_rye_filter	SECCE7Rv1G0460350.1	Coverage	65.5439
chr7R	31187058	31187564	.	-	PGSB	exon	.	ID=SECCE7Rv1G0460360.1.exon.1;Parent=SECCE7Rv1G0460360.1	SECCE7Rv1G0460360.1	1047	present	Chromosome	lo7-cs_q30_rye_filter	SECCE7Rv1G0460360.1	Coverage	100
chr7R	31191850	31193155	.	+	PGSB	exon	.	ID=SECCE7Rv1G0460370.1.exon.1;Parent=SECCE7Rv1G0460370.1	SECCE7Rv1G0460370.1	1305	present	Chromosome	lo7-cs_q30_rye_filter	SECCE7Rv1G0460370.1	Coverage	100
chr7R	31195903	31196190	.	-	PGSB	exon	.	ID=SECCE7Rv1G0460380.1.exon.1;Parent=SECCE7Rv1G0460380.1	SECCE7Rv1G0460380.1	622	present	Chromosome	lo7-cs_q30_rye_filter	SECCE7Rv1G0460380.1	Coverage	58.7347
chr7R	31242533	31245116	.	+	PGSB	exon	.	ID=SECCE7Rv1G0460390.1.exon.1;Parent=SECCE7Rv1G0460390.1	SECCE7Rv1G0460390.1	1433	present	Chromosome	lo7-cs_q30_rye_filter	SECCE7Rv1G0460390.1	Coverage	55.4781
chr7R	31246947	31247198	.	-	PGSB	exon	.	ID=SECCE7Rv1G0460400.1.exon.1;Parent=SECCE7Rv1G0460400.1	SECCE7Rv1G0460400.1	804	present	Chromosome	lo7-cs_q30_rye_filter	SECCE7Rv1G0460400.1	Coverage	37.2222
chr7R	31252484	31252988	.	+	PGSB	exon	.	ID=SECCE7Rv1G0460410.1.exon.1;Parent=SECCE7Rv1G0460410.1	SECCE7Rv1G0460410.1	492	present	Chromosome	lo7-cs_q30_rye_filter	SECCE7Rv1G0460410.1	Coverage	97.619
chr7R	31665644	31665809	.	+	PGSB	exon	.	ID=SECCE7Rv1G0460420.1.exon.1;Parent=SECCE7Rv1G0460420.1	SECCE7Rv1G0460420.1	0	absent	Chromosome	lo7-cs_q30_rye_filter	SECCE7Rv1G0460420.1	Coverage	0
chr7R	31818168	31818561	.	+	PGSB	exon	.	ID=SECCE7Rv1G0460430.1.exon.1;Parent=SECCE7Rv1G0460430.1	SECCE7Rv1G0460430.1	0	absent	Chromosome	lo7-cs_q30_rye_filter	SECCE7Rv1G0460430.1	Coverage	0
chr7R	31832915	31833046	.	+	PGSB	exon	.	ID=SECCE7Rv1G0460440.1.exon.1;Parent=SECCE7Rv1G0460440.1	SECCE7Rv1G0460440.1	387	present	Chromosome	lo7-cs_q30_rye_filter	SECCE7Rv1G0460440.1	Coverage	60.5634
chr7R	31837423	31838326	.	-	PGSB	exon	.	ID=SECCE7Rv1G0460450.1.exon.1;Parent=SECCE7Rv1G0460450.1	SECCE7Rv1G0460450.1	128	present	Chromosome	lo7-cs_q30_rye_filter	SECCE7Rv1G0460450.1	Coverage	14.175
chr7R	31838908	31839220	.	-	PGSB	exon	.	ID=SECCE7Rv1G0460460.1.exon.1;Parent=SECCE7Rv1G0460460.1	SECCE7Rv1G0460460.1	0	absent	Chromosome	lo7-cs_q30_rye_filter	SECCE7Rv1G0460460.1	Coverage	0
chr7R	31955858	31956919	.	+	PGSB	exon	.	ID=SECCE7Rv1G0460470.1.exon.1;Parent=SECCE7Rv1G0460470.1	SECCE7Rv1G0460470.1	1110	present	Chromosome	lo7-cs_q30_rye_filter	SECCE7Rv1G0460470.1	Coverage	100
chr7R	31970219	31971319	.	+	PGSB	exon	.	ID=SECCE7Rv1G0460480.1.exon.1;Parent=SECCE7Rv1G0460480.1	SECCE7Rv1G0460480.1	924	present	Chromosome	lo7-cs_q30_rye_filter	SECCE7Rv1G0460480.1	Coverage	80.4178
chr7R	32051757	32051843	.	-	PGSB	exon	.	ID=SECCE7Rv1G0460490.1.exon.1;Parent=SECCE7Rv1G0460490.1	SECCE7Rv1G0460490.1	288	present	Chromosome	lo7-cs_q30_rye_filter	SECCE7Rv1G0460490.1	Coverage	100
chr7R	32149491	32149719	.	-	PGSB	exon	.	ID=SECCE7Rv1G0460500.1.exon.1;Parent=SECCE7Rv1G0460500.1	SECCE7Rv1G0460500.1	0	absent	Chromosome	lo7-cs_q30_rye_filter	SECCE7Rv1G0460500.1	Coverage	0
chr7R	32170949	32171417	.	+	PGSB	exon	.	ID=SECCE7Rv1G0460510.1.exon.1;Parent=SECCE7Rv1G0460510.1	SECCE7Rv1G0460510.1	16	absent	Chromosome	lo7-cs_q30_rye_filter	SECCE7Rv1G0460510.1	Coverage	1.7094
chr7R	32177802	32178222	.	-	PGSB	exon	.	ID=SECCE7Rv1G0460520.1.exon.1;Parent=SECCE7Rv1G0460520.1	SECCE7Rv1G0460520.1	0	absent	Chromosome	lo7-cs_q30_rye_filter	SECCE7Rv1G0460520.1	Coverage	0
chr7R	32179823	32179879	.	-	PGSB	exon	.	ID=SECCE7Rv1G0460530.1.exon.1;Parent=SECCE7Rv1G0460530.1	SECCE7Rv1G0460530.1	0	absent	Chromosome	lo7-cs_q30_rye_filter	SECCE7Rv1G0460530.1	Coverage	0
chr7R	32183256	32183342	.	-	PGSB	exon	.	ID=SECCE7Rv1G0460540.1.exon.1;Parent=SECCE7Rv1G0460540.1	SECCE7Rv1G0460540.1	0	absent	Chromosome	lo7-cs_q30_rye_filter	SECCE7Rv1G0460540.1	Coverage	0
chr7R	32185846	32187598	.	+	PGSB	exon	.	ID=SECCE7Rv1G0460550.1.exon.1;Parent=SECCE7Rv1G0460550.1	SECCE7Rv1G0460550.1	0	absent	Chromosome	lo7-cs_q30_rye_filter	SECCE7Rv1G0460550.1	Coverage	0
chr7R	32188941	32189313	.	+	PGSB	exon	.	ID=SECCE7Rv1G0460560.1.exon.1;Parent=SECCE7Rv1G0460560.1	SECCE7Rv1G0460560.1	0	absent	Chromosome	lo7-cs_q30_rye_filter	SECCE7Rv1G0460560.1	Coverage	0
chr7R	32190024	32192007	.	+	PGSB	exon	.	ID=SECCE7Rv1G0460570.1.exon.1;Parent=SECCE7Rv1G0460570.1	SECCE7Rv1G0460570.1	0	absent	Chromosome	lo7-cs_q30_rye_filter	SECCE7Rv1G0460570.1	Coverage	0
chr7R	32192160	32192263	.	+	PGSB	exon	.	ID=SECCE7Rv1G0460580.1.exon.1;Parent=SECCE7Rv1G0460580.1	SECCE7Rv1G0460580.1	0	absent	Chromosome	lo7-cs_q30_rye_filter	SECCE7Rv1G0460580.1	Coverage	0
chr7R	32261450	32261537	.	-	PGSB	exon	.	ID=SECCE7Rv1G0460590.1.exon.1;Parent=SECCE7Rv1G0460590.1	SECCE7Rv1G0460590.1	813	present	Chromosome	lo7-cs_q30_rye_filter	SECCE7Rv1G0460590.1	Coverage	100
chr7R	32274926	32275817	.	+	PGSB	exon	.	ID=SECCE7Rv1G0460600.1.exon.1;Parent=SECCE7Rv1G0460600.1	SECCE7Rv1G0460600.1	859	present	Chromosome	lo7-cs_q30_rye_filter	SECCE7Rv1G0460600.1	Coverage	96.4085
chr7R	32289018	32289402	.	-	PGSB	exon	.	ID=SECCE7Rv1G0460610.1.exon.1;Parent=SECCE7Rv1G0460610.1	SECCE7Rv1G0460610.1	301	present	Chromosome	lo7-cs_q30_rye_filter	SECCE7Rv1G0460610.1	Coverage	78.3854
chr7R	32311589	32313054	.	-	PGSB	exon	.	ID=SECCE7Rv1G0460620.1.exon.1;Parent=SECCE7Rv1G0460620.1	SECCE7Rv1G0460620.1	1461	present	Chromosome	lo7-cs_q30_rye_filter	SECCE7Rv1G0460620.1	Coverage	98.583
chr7R	32336556	32337741	.	+	PGSB	exon	.	ID=SECCE7Rv1G0460630.1.exon.1;Parent=SECCE7Rv1G0460630.1	SECCE7Rv1G0460630.1	824	present	Chromosome	lo7-cs_q30_rye_filter	SECCE7Rv1G0460630.1	Coverage	69.5359
chr7R	32540754	32541282	.	+	PGSB	exon	.	ID=SECCE7Rv1G0460640.1.exon.1;Parent=SECCE7Rv1G0460640.1	SECCE7Rv1G0460640.1	542	present	Chromosome	lo7-cs_q30_rye_filter	SECCE7Rv1G0460640.1	Coverage	54.0918
chr7R	32723460	32723961	.	+	PGSB	exon	.	ID=SECCE7Rv1G0460650.1.exon.1;Parent=SECCE7Rv1G0460650.1	SECCE7Rv1G0460650.1	972	present	Chromosome	lo7-cs_q30_rye_filter	SECCE7Rv1G0460650.1	Coverage	100
chr7R	32807515	32807558	.	+	PGSB	exon	.	ID=SECCE7Rv1G0460660.1.exon.1;Parent=SECCE7Rv1G0460660.1	SECCE7Rv1G0460660.1	1350	present	Chromosome	lo7-cs_q30_rye_filter	SECCE7Rv1G0460660.1	Coverage	69.3374
chr7R	32824462	32826838	.	-	PGSB	exon	.	ID=SECCE7Rv1G0460670.1.exon.1;Parent=SECCE7Rv1G0460670.1	SECCE7Rv1G0460670.1	2376	present	Chromosome	lo7-cs_q30_rye_filter	SECCE7Rv1G0460670.1	Coverage	100
chr7R	32858083	32859058	.	-	PGSB	exon	.	ID=SECCE7Rv1G0460680.1.exon.1;Parent=SECCE7Rv1G0460680.1	SECCE7Rv1G0460680.1	887	present	Chromosome	lo7-cs_q30_rye_filter	SECCE7Rv1G0460680.1	Coverage	90.9744
chr7R	32861167	32861245	.	-	PGSB	exon	.	ID=SECCE7Rv1G0460690.1.exon.1;Parent=SECCE7Rv1G0460690.1	SECCE7Rv1G0460690.1	1330	present	Chromosome	lo7-cs_q30_rye_filter	SECCE7Rv1G0460690.1	Coverage	78.8849
chr7R	32876421	32876476	.	-	PGSB	exon	.	ID=SECCE7Rv1G0460700.1.exon.1;Parent=SECCE7Rv1G0460700.1	SECCE7Rv1G0460700.1	215	present	Chromosome	lo7-cs_q30_rye_filter	SECCE7Rv1G0460700.1	Coverage	79.6296
chr7R	32997173	32997758	.	-	PGSB	exon	.	ID=SECCE7Rv1G0460710.1.exon.1;Parent=SECCE7Rv1G0460710.1	SECCE7Rv1G0460710.1	2384	present	Chromosome	lo7-cs_q30_rye_filter	SECCE7Rv1G0460710.1	Coverage	72.7717
chr7R	33028919	33028994	.	+	PGSB	exon	.	ID=SECCE7Rv1G0460720.1.exon.1;Parent=SECCE7Rv1G0460720.1	SECCE7Rv1G0460720.1	0	absent	Chromosome	lo7-cs_q30_rye_filter	SECCE7Rv1G0460720.1	Coverage	0
chr7R	33030699	33031005	.	+	PGSB	exon	.	ID=SECCE7Rv1G0460730.1.exon.1;Parent=SECCE7Rv1G0460730.1	SECCE7Rv1G0460730.1	0	absent	Chromosome	lo7-cs_q30_rye_filter	SECCE7Rv1G0460730.1	Coverage	0
chr7R	33059871	33060258	.	+	PGSB	exon	.	ID=SECCE7Rv1G0460740.1.exon.1;Parent=SECCE7Rv1G0460740.1	SECCE7Rv1G0460740.1	0	absent	Chromosome	lo7-cs_q30_rye_filter	SECCE7Rv1G0460740.1	Coverage	0
chr7R	33064785	33064977	.	+	PGSB	exon	.	ID=SECCE7Rv1G0460750.1.exon.1;Parent=SECCE7Rv1G0460750.1	SECCE7Rv1G0460750.1	1476	present	Chromosome	lo7-cs_q30_rye_filter	SECCE7Rv1G0460750.1	Coverage	100
chr7R	33094435	33094813	.	-	PGSB	exon	.	ID=SECCE7Rv1G0460760.1.exon.1;Parent=SECCE7Rv1G0460760.1	SECCE7Rv1G0460760.1	72	present	Chromosome	lo7-cs_q30_rye_filter	SECCE7Rv1G0460760.1	Coverage	5.92593
chr7R	33122755	33123250	.	+	PGSB	exon	.	ID=SECCE7Rv1G0460770.1.exon.1;Parent=SECCE7Rv1G0460770.1	SECCE7Rv1G0460770.1	0	absent	Chromosome	lo7-cs_q30_rye_filter	SECCE7Rv1G0460770.1	Coverage	0
chr7R	33125230	33125608	.	-	PGSB	exon	.	ID=SECCE7Rv1G0460780.1.exon.1;Parent=SECCE7Rv1G0460780.1	SECCE7Rv1G0460780.1	770	present	Chromosome	lo7-cs_q30_rye_filter	SECCE7Rv1G0460780.1	Coverage	63.3745
chr7R	33274894	33275161	.	+	PGSB	exon	.	ID=SECCE7Rv1G0460790.1.exon.1;Parent=SECCE7Rv1G0460790.1	SECCE7Rv1G0460790.1	1248	present	Chromosome	lo7-cs_q30_rye_filter	SECCE7Rv1G0460790.1	Coverage	100
chr7R	33756480	33756633	.	+	PGSB	exon	.	ID=SECCE7Rv1G0460800.1.exon.1;Parent=SECCE7Rv1G0460800.1	SECCE7Rv1G0460800.1	1215	present	Chromosome	lo7-cs_q30_rye_filter	SECCE7Rv1G0460800.1	Coverage	100
chr7R	33762727	33763411	.	+	PGSB	exon	.	ID=SECCE7Rv1G0460810.1.exon.1;Parent=SECCE7Rv1G0460810.1	SECCE7Rv1G0460810.1	753	present	Chromosome	lo7-cs_q30_rye_filter	SECCE7Rv1G0460810.1	Coverage	100
chr7R	33845931	33846317	.	-	PGSB	exon	.	ID=SECCE7Rv1G0460820.1.exon.1;Parent=SECCE7Rv1G0460820.1	SECCE7Rv1G0460820.1	477	present	Chromosome	lo7-cs_q30_rye_filter	SECCE7Rv1G0460820.1	Coverage	100
chr7R	33854744	33855026	.	+	PGSB	exon	.	ID=SECCE7Rv1G0460830.1.exon.1;Parent=SECCE7Rv1G0460830.1	SECCE7Rv1G0460830.1	972	present	Chromosome	lo7-cs_q30_rye_filter	SECCE7Rv1G0460830.1	Coverage	100
chr7R	33873625	33873968	.	+	PGSB	exon	.	ID=SECCE7Rv1G0460840.1.exon.1;Parent=SECCE7Rv1G0460840.1	SECCE7Rv1G0460840.1	807	present	Chromosome	lo7-cs_q30_rye_filter	SECCE7Rv1G0460840.1	Coverage	100
chr7R	33875607	33876133	.	-	PGSB	exon	.	ID=SECCE7Rv1G0460850.1.exon.1;Parent=SECCE7Rv1G0460850.1	SECCE7Rv1G0460850.1	540	present	Chromosome	lo7-cs_q30_rye_filter	SECCE7Rv1G0460850.1	Coverage	100
chr7R	33876394	33876586	.	-	PGSB	exon	.	ID=SECCE7Rv1G0460860.1.exon.1;Parent=SECCE7Rv1G0460860.1	SECCE7Rv1G0460860.1	192	present	Chromosome	lo7-cs_q30_rye_filter	SECCE7Rv1G0460860.1	Coverage	100
chr7R	33939201	33939277	.	+	PGSB	exon	.	ID=SECCE7Rv1G0460870.1.exon.1;Parent=SECCE7Rv1G0460870.1	SECCE7Rv1G0460870.1	768	present	Chromosome	lo7-cs_q30_rye_filter	SECCE7Rv1G0460870.1	Coverage	100
chr7R	33948574	33949846	.	-	PGSB	exon	.	ID=SECCE7Rv1G0460880.1.exon.1;Parent=SECCE7Rv1G0460880.1	SECCE7Rv1G0460880.1	1272	present	Chromosome	lo7-cs_q30_rye_filter	SECCE7Rv1G0460880.1	Coverage	100
chr7R	33952967	33952985	.	+	PGSB	exon	.	ID=SECCE7Rv1G0460890.1.exon.1;Parent=SECCE7Rv1G0460890.1	SECCE7Rv1G0460890.1	192	present	Chromosome	lo7-cs_q30_rye_filter	SECCE7Rv1G0460890.1	Coverage	100
chr7R	33964325	33964631	.	+	PGSB	exon	.	ID=SECCE7Rv1G0460900.1.exon.1;Parent=SECCE7Rv1G0460900.1	SECCE7Rv1G0460900.1	306	present	Chromosome	lo7-cs_q30_rye_filter	SECCE7Rv1G0460900.1	Coverage	100
chr7R	33968983	33969287	.	+	PGSB	exon	.	ID=SECCE7Rv1G0460910.1.exon.1;Parent=SECCE7Rv1G0460910.1	SECCE7Rv1G0460910.1	417	present	Chromosome	lo7-cs_q30_rye_filter	SECCE7Rv1G0460910.1	Coverage	100
chr7R	34001022	34002332	.	+	PGSB	exon	.	ID=SECCE7Rv1G0460920.1.exon.1;Parent=SECCE7Rv1G0460920.1	SECCE7Rv1G0460920.1	1248	present	Chromosome	lo7-cs_q30_rye_filter	SECCE7Rv1G0460920.1	Coverage	57.3003
chr7R	34009558	34009679	.	-	PGSB	exon	.	ID=SECCE7Rv1G0460930.1.exon.1;Parent=SECCE7Rv1G0460930.1	SECCE7Rv1G0460930.1	1452	present	Chromosome	lo7-cs_q30_rye_filter	SECCE7Rv1G0460930.1	Coverage	100
chr7R	34144624	34145931	.	+	PGSB	exon	.	ID=SECCE7Rv1G0460940.1.exon.1;Parent=SECCE7Rv1G0460940.1	SECCE7Rv1G0460940.1	1092	present	Chromosome	lo7-cs_q30_rye_filter	SECCE7Rv1G0460940.1	Coverage	50.2069
chr7R	34152179	34152300	.	-	PGSB	exon	.	ID=SECCE7Rv1G0460950.1.exon.1;Parent=SECCE7Rv1G0460950.1	SECCE7Rv1G0460950.1	1434	present	Chromosome	lo7-cs_q30_rye_filter	SECCE7Rv1G0460950.1	Coverage	100
chr7R	34343139	34344428	.	+	PGSB	exon	.	ID=SECCE7Rv1G0460960.1.exon.1;Parent=SECCE7Rv1G0460960.1	SECCE7Rv1G0460960.1	1641	present	Chromosome	lo7-cs_q30_rye_filter	SECCE7Rv1G0460960.1	Coverage	100
chr7R	34352073	34353377	.	+	PGSB	exon	.	ID=SECCE7Rv1G0460970.1.exon.1;Parent=SECCE7Rv1G0460970.1	SECCE7Rv1G0460970.1	1617	present	Chromosome	lo7-cs_q30_rye_filter	SECCE7Rv1G0460970.1	Coverage	100
chr7R	34361606	34362904	.	+	PGSB	exon	.	ID=SECCE7Rv1G0460980.1.exon.1;Parent=SECCE7Rv1G0460980.1	SECCE7Rv1G0460980.1	2067	present	Chromosome	lo7-cs_q30_rye_filter	SECCE7Rv1G0460980.1	Coverage	94.513
chr7R	34714135	34715341	.	+	PGSB	exon	.	ID=SECCE7Rv1G0460990.1.exon.1;Parent=SECCE7Rv1G0460990.1	SECCE7Rv1G0460990.1	1206	present	Chromosome	lo7-cs_q30_rye_filter	SECCE7Rv1G0460990.1	Coverage	100
chr7R	34742349	34743635	.	+	PGSB	exon	.	ID=SECCE7Rv1G0461000.1.exon.1;Parent=SECCE7Rv1G0461000.1	SECCE7Rv1G0461000.1	2108	present	Chromosome	lo7-cs_q30_rye_filter	SECCE7Rv1G0461000.1	Coverage	89.5117
chr7R	34748508	34749743	.	+	PGSB	exon	.	ID=SECCE7Rv1G0461010.1.exon.1;Parent=SECCE7Rv1G0461010.1	SECCE7Rv1G0461010.1	367	present	Chromosome	lo7-cs_q30_rye_filter	SECCE7Rv1G0461010.1	Coverage	18.0966
chr7R	35101019	35102321	.	+	PGSB	exon	.	ID=SECCE7Rv1G0461020.1.exon.1;Parent=SECCE7Rv1G0461020.1	SECCE7Rv1G0461020.1	1302	present	Chromosome	lo7-cs_q30_rye_filter	SECCE7Rv1G0461020.1	Coverage	100
chr7R	35135312	35136607	.	+	PGSB	exon	.	ID=SECCE7Rv1G0461030.1.exon.1;Parent=SECCE7Rv1G0461030.1	SECCE7Rv1G0461030.1	1662	present	Chromosome	lo7-cs_q30_rye_filter	SECCE7Rv1G0461030.1	Coverage	70.3046
chr7R	35142700	35143978	.	-	PGSB	exon	.	ID=SECCE7Rv1G0461040.1.exon.1;Parent=SECCE7Rv1G0461040.1	SECCE7Rv1G0461040.1	1278	present	Chromosome	lo7-cs_q30_rye_filter	SECCE7Rv1G0461040.1	Coverage	100
chr7R	35394548	35394599	.	-	PGSB	exon	.	ID=SECCE7Rv1G0461050.1.exon.1;Parent=SECCE7Rv1G0461050.1	SECCE7Rv1G0461050.1	314	present	Chromosome	lo7-cs_q30_rye_filter	SECCE7Rv1G0461050.1	Coverage	15.4832
chr7R	35398923	35399115	.	-	PGSB	exon	.	ID=SECCE7Rv1G0461060.1.exon.1;Parent=SECCE7Rv1G0461060.1	SECCE7Rv1G0461060.1	647	present	Chromosome	lo7-cs_q30_rye_filter	SECCE7Rv1G0461060.1	Coverage	29.2231
chr7R	35508862	35509042	.	-	PGSB	exon	.	ID=SECCE7Rv1G0461070.1.exon.1;Parent=SECCE7Rv1G0461070.1	SECCE7Rv1G0461070.1	1284	present	Chromosome	lo7-cs_q30_rye_filter	SECCE7Rv1G0461070.1	Coverage	58.2313
chr7R	35588216	35588460	.	-	PGSB	exon	.	ID=SECCE7Rv1G0461080.1.exon.1;Parent=SECCE7Rv1G0461080.1	SECCE7Rv1G0461080.1	1460	present	Chromosome	lo7-cs_q30_rye_filter	SECCE7Rv1G0461080.1	Coverage	95.8005
chr7R	35659856	35660076	.	-	PGSB	exon	.	ID=SECCE7Rv1G0461090.1.exon.1;Parent=SECCE7Rv1G0461090.1	SECCE7Rv1G0461090.1	1345	present	Chromosome	lo7-cs_q30_rye_filter	SECCE7Rv1G0461090.1	Coverage	88.4287
chr7R	35665071	35666351	.	-	PGSB	exon	.	ID=SECCE7Rv1G0461100.1.exon.1;Parent=SECCE7Rv1G0461100.1	SECCE7Rv1G0461100.1	1134	present	Chromosome	lo7-cs_q30_rye_filter	SECCE7Rv1G0461100.1	Coverage	88.5938
chr7R	35840817	35841138	.	-	PGSB	exon	.	ID=SECCE7Rv1G0461110.1.exon.1;Parent=SECCE7Rv1G0461110.1	SECCE7Rv1G0461110.1	642	present	Chromosome	lo7-cs_q30_rye_filter	SECCE7Rv1G0461110.1	Coverage	100
chr7R	35845847	35846005	.	-	PGSB	exon	.	ID=SECCE7Rv1G0461120.1.exon.1;Parent=SECCE7Rv1G0461120.1	SECCE7Rv1G0461120.1	404	present	Chromosome	lo7-cs_q30_rye_filter	SECCE7Rv1G0461120.1	Coverage	23.8771
chr7R	35915022	35915343	.	-	PGSB	exon	.	ID=SECCE7Rv1G0461130.1.exon.1;Parent=SECCE7Rv1G0461130.1	SECCE7Rv1G0461130.1	1515	present	Chromosome	lo7-cs_q30_rye_filter	SECCE7Rv1G0461130.1	Coverage	64.7436
chr7R	36002550	36002590	.	-	PGSB	exon	.	ID=SECCE7Rv1G0461140.1.exon.1;Parent=SECCE7Rv1G0461140.1	SECCE7Rv1G0461140.1	1039	present	Chromosome	lo7-cs_q30_rye_filter	SECCE7Rv1G0461140.1	Coverage	66.7309
chr7R	36008559	36008617	.	-	PGSB	exon	.	ID=SECCE7Rv1G0461150.1.exon.1;Parent=SECCE7Rv1G0461150.1	SECCE7Rv1G0461150.1	1338	present	Chromosome	lo7-cs_q30_rye_filter	SECCE7Rv1G0461150.1	Coverage	100
chr7R	36017659	36017670	.	-	PGSB	exon	.	ID=SECCE7Rv1G0461160.1.exon.1;Parent=SECCE7Rv1G0461160.1	SECCE7Rv1G0461160.1	1164	present	Chromosome	lo7-cs_q30_rye_filter	SECCE7Rv1G0461160.1	Coverage	77.1372
chr7R	36150434	36150769	.	+	PGSB	exon	.	ID=SECCE7Rv1G0461170.1.exon.1;Parent=SECCE7Rv1G0461170.1	SECCE7Rv1G0461170.1	399	present	Chromosome	lo7-cs_q30_rye_filter	SECCE7Rv1G0461170.1	Coverage	100
chr7R	36234298	36234619	.	-	PGSB	exon	.	ID=SECCE7Rv1G0461180.1.exon.1;Parent=SECCE7Rv1G0461180.1	SECCE7Rv1G0461180.1	1359	present	Chromosome	lo7-cs_q30_rye_filter	SECCE7Rv1G0461180.1	Coverage	83.4254
chr7R	36286753	36287053	.	-	PGSB	exon	.	ID=SECCE7Rv1G0461190.1.exon.1;Parent=SECCE7Rv1G0461190.1	SECCE7Rv1G0461190.1	300	present	Chromosome	lo7-cs_q30_rye_filter	SECCE7Rv1G0461190.1	Coverage	100
chr7R	36370715	36370908	.	-	PGSB	exon	.	ID=SECCE7Rv1G0461200.1.exon.1;Parent=SECCE7Rv1G0461200.1	SECCE7Rv1G0461200.1	1141	present	Chromosome	lo7-cs_q30_rye_filter	SECCE7Rv1G0461200.1	Coverage	77.3035
chr7R	36375886	36377166	.	-	PGSB	exon	.	ID=SECCE7Rv1G0461210.1.exon.1;Parent=SECCE7Rv1G0461210.1	SECCE7Rv1G0461210.1	700	present	Chromosome	lo7-cs_q30_rye_filter	SECCE7Rv1G0461210.1	Coverage	54.6875
chr7R	36638002	36639943	.	+	PGSB	exon	.	ID=SECCE7Rv1G0461220.1.exon.1;Parent=SECCE7Rv1G0461220.1	SECCE7Rv1G0461220.1	1941	present	Chromosome	lo7-cs_q30_rye_filter	SECCE7Rv1G0461220.1	Coverage	100
chr7R	36688893	36689154	.	-	PGSB	exon	.	ID=SECCE7Rv1G0461230.1.exon.1;Parent=SECCE7Rv1G0461230.1	SECCE7Rv1G0461230.1	261	present	Chromosome	lo7-cs_q30_rye_filter	SECCE7Rv1G0461230.1	Coverage	100
chr7R	36718161	36719455	.	-	PGSB	exon	.	ID=SECCE7Rv1G0461240.1.exon.1;Parent=SECCE7Rv1G0461240.1	SECCE7Rv1G0461240.1	1635	present	Chromosome	lo7-cs_q30_rye_filter	SECCE7Rv1G0461240.1	Coverage	100
chr7R	36829853	36830198	.	-	PGSB	exon	.	ID=SECCE7Rv1G0461250.1.exon.1;Parent=SECCE7Rv1G0461250.1	SECCE7Rv1G0461250.1	0	absent	Chromosome	lo7-cs_q30_rye_filter	SECCE7Rv1G0461250.1	Coverage	0
chr7R	36830306	36830729	.	-	PGSB	exon	.	ID=SECCE7Rv1G0461260.1.exon.1;Parent=SECCE7Rv1G0461260.1	SECCE7Rv1G0461260.1	0	absent	Chromosome	lo7-cs_q30_rye_filter	SECCE7Rv1G0461260.1	Coverage	0
chr7R	36891528	36891621	.	+	PGSB	exon	.	ID=SECCE7Rv1G0461270.1.exon.1;Parent=SECCE7Rv1G0461270.1	SECCE7Rv1G0461270.1	381	present	Chromosome	lo7-cs_q30_rye_filter	SECCE7Rv1G0461270.1	Coverage	100
chr7R	37012919	37013351	.	+	PGSB	exon	.	ID=SECCE7Rv1G0461280.1.exon.1;Parent=SECCE7Rv1G0461280.1	SECCE7Rv1G0461280.1	432	present	Chromosome	lo7-cs_q30_rye_filter	SECCE7Rv1G0461280.1	Coverage	100
chr7R	37035276	37035495	.	+	PGSB	exon	.	ID=SECCE7Rv1G0461290.1.exon.1;Parent=SECCE7Rv1G0461290.1	SECCE7Rv1G0461290.1	219	present	Chromosome	lo7-cs_q30_rye_filter	SECCE7Rv1G0461290.1	Coverage	100
chr7R	37210853	37211700	.	+	PGSB	exon	.	ID=SECCE7Rv1G0461300.1.exon.1;Parent=SECCE7Rv1G0461300.1	SECCE7Rv1G0461300.1	86	present	Chromosome	lo7-cs_q30_rye_filter	SECCE7Rv1G0461300.1	Coverage	6.1123
chr7R	37241841	37242279	.	+	PGSB	exon	.	ID=SECCE7Rv1G0461310.1.exon.1;Parent=SECCE7Rv1G0461310.1	SECCE7Rv1G0461310.1	10	absent	Chromosome	lo7-cs_q30_rye_filter	SECCE7Rv1G0461310.1	Coverage	1.14943
chr7R	37252180	37253959	.	+	PGSB	exon	.	ID=SECCE7Rv1G0461320.1.exon.1;Parent=SECCE7Rv1G0461320.1	SECCE7Rv1G0461320.1	284	present	Chromosome	lo7-cs_q30_rye_filter	SECCE7Rv1G0461320.1	Coverage	15.964
chr7R	37255176	37256793	.	+	PGSB	exon	.	ID=SECCE7Rv1G0461330.1.exon.1;Parent=SECCE7Rv1G0461330.1	SECCE7Rv1G0461330.1	0	absent	Chromosome	lo7-cs_q30_rye_filter	SECCE7Rv1G0461330.1	Coverage	0
chr7R	37290576	37290650	.	+	PGSB	exon	.	ID=SECCE7Rv1G0461340.1.exon.1;Parent=SECCE7Rv1G0461340.1	SECCE7Rv1G0461340.1	366	present	Chromosome	lo7-cs_q30_rye_filter	SECCE7Rv1G0461340.1	Coverage	24.898
chr7R	37311892	37311964	.	-	PGSB	exon	.	ID=SECCE7Rv1G0461350.1.exon.1;Parent=SECCE7Rv1G0461350.1	SECCE7Rv1G0461350.1	912	present	Chromosome	lo7-cs_q30_rye_filter	SECCE7Rv1G0461350.1	Coverage	100
chr7R	37314481	37314685	.	+	PGSB	exon	.	ID=SECCE7Rv1G0461360.1.exon.1;Parent=SECCE7Rv1G0461360.1	SECCE7Rv1G0461360.1	204	present	Chromosome	lo7-cs_q30_rye_filter	SECCE7Rv1G0461360.1	Coverage	100
chr7R	37432958	37433065	.	+	PGSB	exon	.	ID=SECCE7Rv1G0461370.1.exon.1;Parent=SECCE7Rv1G0461370.1	SECCE7Rv1G0461370.1	291	present	Chromosome	lo7-cs_q30_rye_filter	SECCE7Rv1G0461370.1	Coverage	100
chr7R	37440115	37440466	.	-	PGSB	exon	.	ID=SECCE7Rv1G0461380.1.exon.1;Parent=SECCE7Rv1G0461380.1	SECCE7Rv1G0461380.1	531	present	Chromosome	lo7-cs_q30_rye_filter	SECCE7Rv1G0461380.1	Coverage	100
chr7R	37515171	37515199	.	-	PGSB	exon	.	ID=SECCE7Rv1G0461390.1.exon.1;Parent=SECCE7Rv1G0461390.1	SECCE7Rv1G0461390.1	198	present	Chromosome	lo7-cs_q30_rye_filter	SECCE7Rv1G0461390.1	Coverage	100
chr7R	37640200	37640311	.	+	PGSB	exon	.	ID=SECCE7Rv1G0461400.1.exon.1;Parent=SECCE7Rv1G0461400.1	SECCE7Rv1G0461400.1	687	present	Chromosome	lo7-cs_q30_rye_filter	SECCE7Rv1G0461400.1	Coverage	100
chr7R	37643619	37643893	.	-	PGSB	exon	.	ID=SECCE7Rv1G0461410.1.exon.1;Parent=SECCE7Rv1G0461410.1	SECCE7Rv1G0461410.1	999	present	Chromosome	lo7-cs_q30_rye_filter	SECCE7Rv1G0461410.1	Coverage	100
chr7R	37688401	37688890	.	-	PGSB	exon	.	ID=SECCE7Rv1G0461420.1.exon.1;Parent=SECCE7Rv1G0461420.1	SECCE7Rv1G0461420.1	1038	present	Chromosome	lo7-cs_q30_rye_filter	SECCE7Rv1G0461420.1	Coverage	100
chr7R	37717022	37717736	.	-	PGSB	exon	.	ID=SECCE7Rv1G0461430.1.exon.1;Parent=SECCE7Rv1G0461430.1	SECCE7Rv1G0461430.1	714	present	Chromosome	lo7-cs_q30_rye_filter	SECCE7Rv1G0461430.1	Coverage	100
chr7R	37733513	37734068	.	+	PGSB	exon	.	ID=SECCE7Rv1G0461440.1.exon.1;Parent=SECCE7Rv1G0461440.1	SECCE7Rv1G0461440.1	555	present	Chromosome	lo7-cs_q30_rye_filter	SECCE7Rv1G0461440.1	Coverage	100
chr7R	37822014	37823496	.	+	PGSB	exon	.	ID=SECCE7Rv1G0461450.1.exon.1;Parent=SECCE7Rv1G0461450.1	SECCE7Rv1G0461450.1	1482	present	Chromosome	lo7-cs_q30_rye_filter	SECCE7Rv1G0461450.1	Coverage	100
chr7R	37855837	37856695	.	-	PGSB	exon	.	ID=SECCE7Rv1G0461460.1.exon.1;Parent=SECCE7Rv1G0461460.1	SECCE7Rv1G0461460.1	858	present	Chromosome	lo7-cs_q30_rye_filter	SECCE7Rv1G0461460.1	Coverage	100
chr7R	37862605	37862976	.	-	PGSB	exon	.	ID=SECCE7Rv1G0461470.1.exon.1;Parent=SECCE7Rv1G0461470.1	SECCE7Rv1G0461470.1	588	present	Chromosome	lo7-cs_q30_rye_filter	SECCE7Rv1G0461470.1	Coverage	100
chr7R	38137472	38137940	.	-	PGSB	exon	.	ID=SECCE7Rv1G0461480.1.exon.1;Parent=SECCE7Rv1G0461480.1	SECCE7Rv1G0461480.1	468	present	Chromosome	lo7-cs_q30_rye_filter	SECCE7Rv1G0461480.1	Coverage	100
chr7R	38143715	38144071	.	-	PGSB	exon	.	ID=SECCE7Rv1G0461490.1.exon.1;Parent=SECCE7Rv1G0461490.1	SECCE7Rv1G0461490.1	462	present	Chromosome	lo7-cs_q30_rye_filter	SECCE7Rv1G0461490.1	Coverage	100
chr7R	38211469	38211564	.	-	PGSB	exon	.	ID=SECCE7Rv1G0461500.1.exon.1;Parent=SECCE7Rv1G0461500.1	SECCE7Rv1G0461500.1	180	present	Chromosome	lo7-cs_q30_rye_filter	SECCE7Rv1G0461500.1	Coverage	100
chr7R	38214625	38215246	.	-	PGSB	exon	.	ID=SECCE7Rv1G0461510.1.exon.1;Parent=SECCE7Rv1G0461510.1	SECCE7Rv1G0461510.1	621	present	Chromosome	lo7-cs_q30_rye_filter	SECCE7Rv1G0461510.1	Coverage	100
chr7R	38217513	38218161	.	-	PGSB	exon	.	ID=SECCE7Rv1G0461520.1.exon.1;Parent=SECCE7Rv1G0461520.1	SECCE7Rv1G0461520.1	648	present	Chromosome	lo7-cs_q30_rye_filter	SECCE7Rv1G0461520.1	Coverage	100
chr7R	38255319	38255871	.	-	PGSB	exon	.	ID=SECCE7Rv1G0461530.1.exon.1;Parent=SECCE7Rv1G0461530.1	SECCE7Rv1G0461530.1	552	present	Chromosome	lo7-cs_q30_rye_filter	SECCE7Rv1G0461530.1	Coverage	100
chr7R	38266505	38267099	.	-	PGSB	exon	.	ID=SECCE7Rv1G0461540.1.exon.1;Parent=SECCE7Rv1G0461540.1	SECCE7Rv1G0461540.1	1950	present	Chromosome	lo7-cs_q30_rye_filter	SECCE7Rv1G0461540.1	Coverage	100
chr7R	38528087	38528223	.	+	PGSB	exon	.	ID=SECCE7Rv1G0461550.1.exon.1;Parent=SECCE7Rv1G0461550.1	SECCE7Rv1G0461550.1	300	present	Chromosome	lo7-cs_q30_rye_filter	SECCE7Rv1G0461550.1	Coverage	100
chr7R	38569627	38569759	.	+	PGSB	exon	.	ID=SECCE7Rv1G0461560.1.exon.1;Parent=SECCE7Rv1G0461560.1	SECCE7Rv1G0461560.1	792	present	Chromosome	lo7-cs_q30_rye_filter	SECCE7Rv1G0461560.1	Coverage	100
chr7R	38608842	38608863	.	-	PGSB	exon	.	ID=SECCE7Rv1G0461570.1.exon.1;Parent=SECCE7Rv1G0461570.1	SECCE7Rv1G0461570.1	715	present	Chromosome	lo7-cs_q30_rye_filter	SECCE7Rv1G0461570.1	Coverage	80.791
chr7R	38612926	38613058	.	+	PGSB	exon	.	ID=SECCE7Rv1G0461580.1.exon.1;Parent=SECCE7Rv1G0461580.1	SECCE7Rv1G0461580.1	34	absent	Chromosome	lo7-cs_q30_rye_filter	SECCE7Rv1G0461580.1	Coverage	4.24469
chr7R	38629163	38629295	.	+	PGSB	exon	.	ID=SECCE7Rv1G0461590.1.exon.1;Parent=SECCE7Rv1G0461590.1	SECCE7Rv1G0461590.1	47	present	Chromosome	lo7-cs_q30_rye_filter	SECCE7Rv1G0461590.1	Coverage	5.86767
chr7R	38694846	38694978	.	+	PGSB	exon	.	ID=SECCE7Rv1G0461600.1.exon.1;Parent=SECCE7Rv1G0461600.1	SECCE7Rv1G0461600.1	807	present	Chromosome	lo7-cs_q30_rye_filter	SECCE7Rv1G0461600.1	Coverage	100
chr7R	38698001	38698392	.	-	PGSB	exon	.	ID=SECCE7Rv1G0461610.1.exon.1;Parent=SECCE7Rv1G0461610.1	SECCE7Rv1G0461610.1	912	present	Chromosome	lo7-cs_q30_rye_filter	SECCE7Rv1G0461610.1	Coverage	100
chr7R	38702126	38702438	.	-	PGSB	exon	.	ID=SECCE7Rv1G0461620.1.exon.1;Parent=SECCE7Rv1G0461620.1	SECCE7Rv1G0461620.1	312	present	Chromosome	lo7-cs_q30_rye_filter	SECCE7Rv1G0461620.1	Coverage	100
chr7R	38702567	38702674	.	-	PGSB	exon	.	ID=SECCE7Rv1G0461630.1.exon.1;Parent=SECCE7Rv1G0461630.1	SECCE7Rv1G0461630.1	597	present	Chromosome	lo7-cs_q30_rye_filter	SECCE7Rv1G0461630.1	Coverage	100
chr7R	38820753	38820948	.	-	PGSB	exon	.	ID=SECCE7Rv1G0461640.1.exon.1;Parent=SECCE7Rv1G0461640.1	SECCE7Rv1G0461640.1	195	present	Chromosome	lo7-cs_q30_rye_filter	SECCE7Rv1G0461640.1	Coverage	100
chr7R	38860424	38860557	.	-	PGSB	exon	.	ID=SECCE7Rv1G0461650.1.exon.1;Parent=SECCE7Rv1G0461650.1	SECCE7Rv1G0461650.1	1968	present	Chromosome	lo7-cs_q30_rye_filter	SECCE7Rv1G0461650.1	Coverage	100
chr7R	39165407	39165428	.	+	PGSB	exon	.	ID=SECCE7Rv1G0461660.1.exon.1;Parent=SECCE7Rv1G0461660.1	SECCE7Rv1G0461660.1	483	present	Chromosome	lo7-cs_q30_rye_filter	SECCE7Rv1G0461660.1	Coverage	100
chr7R	39169789	39170179	.	-	PGSB	exon	.	ID=SECCE7Rv1G0461670.1.exon.1;Parent=SECCE7Rv1G0461670.1	SECCE7Rv1G0461670.1	456	present	Chromosome	lo7-cs_q30_rye_filter	SECCE7Rv1G0461670.1	Coverage	100
chr7R	39171723	39171731	.	-	PGSB	exon	.	ID=SECCE7Rv1G0461680.1.exon.1;Parent=SECCE7Rv1G0461680.1	SECCE7Rv1G0461680.1	393	present	Chromosome	lo7-cs_q30_rye_filter	SECCE7Rv1G0461680.1	Coverage	100
chr7R	39180787	39181108	.	-	PGSB	exon	.	ID=SECCE7Rv1G0461690.1.exon.1;Parent=SECCE7Rv1G0461690.1	SECCE7Rv1G0461690.1	321	present	Chromosome	lo7-cs_q30_rye_filter	SECCE7Rv1G0461690.1	Coverage	100
chr7R	39181237	39181543	.	-	PGSB	exon	.	ID=SECCE7Rv1G0461700.1.exon.1;Parent=SECCE7Rv1G0461700.1	SECCE7Rv1G0461700.1	306	present	Chromosome	lo7-cs_q30_rye_filter	SECCE7Rv1G0461700.1	Coverage	100
chr7R	39375077	39375473	.	+	PGSB	exon	.	ID=SECCE7Rv1G0461710.1.exon.1;Parent=SECCE7Rv1G0461710.1	SECCE7Rv1G0461710.1	1236	present	Chromosome	lo7-cs_q30_rye_filter	SECCE7Rv1G0461710.1	Coverage	100
chr7R	39379444	39379696	.	+	PGSB	exon	.	ID=SECCE7Rv1G0461720.1.exon.1;Parent=SECCE7Rv1G0461720.1	SECCE7Rv1G0461720.1	252	present	Chromosome	lo7-cs_q30_rye_filter	SECCE7Rv1G0461720.1	Coverage	100
chr7R	39380515	39380677	.	-	PGSB	exon	.	ID=SECCE7Rv1G0461730.1.exon.1;Parent=SECCE7Rv1G0461730.1	SECCE7Rv1G0461730.1	1152	present	Chromosome	lo7-cs_q30_rye_filter	SECCE7Rv1G0461730.1	Coverage	100
chr7R	39586574	39586674	.	+	PGSB	exon	.	ID=SECCE7Rv1G0461740.1.exon.1;Parent=SECCE7Rv1G0461740.1	SECCE7Rv1G0461740.1	2634	present	Chromosome	lo7-cs_q30_rye_filter	SECCE7Rv1G0461740.1	Coverage	100
chr7R	39653473	39653597	.	+	PGSB	exon	.	ID=SECCE7Rv1G0461750.1.exon.1;Parent=SECCE7Rv1G0461750.1	SECCE7Rv1G0461750.1	2637	present	Chromosome	lo7-cs_q30_rye_filter	SECCE7Rv1G0461750.1	Coverage	100
chr7R	39875813	39876029	.	-	PGSB	exon	.	ID=SECCE7Rv1G0461760.1.exon.1;Parent=SECCE7Rv1G0461760.1	SECCE7Rv1G0461760.1	2280	present	Chromosome	lo7-cs_q30_rye_filter	SECCE7Rv1G0461760.1	Coverage	100
chr7R	39923903	39924215	.	-	PGSB	exon	.	ID=SECCE7Rv1G0461770.1.exon.1;Parent=SECCE7Rv1G0461770.1	SECCE7Rv1G0461770.1	2064	present	Chromosome	lo7-cs_q30_rye_filter	SECCE7Rv1G0461770.1	Coverage	85.5721
chr7R	39940142	39940454	.	-	PGSB	exon	.	ID=SECCE7Rv1G0461780.1.exon.1;Parent=SECCE7Rv1G0461780.1	SECCE7Rv1G0461780.1	1466	present	Chromosome	lo7-cs_q30_rye_filter	SECCE7Rv1G0461780.1	Coverage	75.9979
chr7R	40090491	40090991	.	+	PGSB	exon	.	ID=SECCE7Rv1G0461790.1.exon.1;Parent=SECCE7Rv1G0461790.1	SECCE7Rv1G0461790.1	924	present	Chromosome	lo7-cs_q30_rye_filter	SECCE7Rv1G0461790.1	Coverage	100
chr7R	40182092	40182865	.	-	PGSB	exon	.	ID=SECCE7Rv1G0461800.1.exon.1;Parent=SECCE7Rv1G0461800.1	SECCE7Rv1G0461800.1	1819	present	Chromosome	lo7-cs_q30_rye_filter	SECCE7Rv1G0461800.1	Coverage	84.9206
chr7R	40208454	40209764	.	+	PGSB	exon	.	ID=SECCE7Rv1G0461810.1.exon.1;Parent=SECCE7Rv1G0461810.1	SECCE7Rv1G0461810.1	1449	present	Chromosome	lo7-cs_q30_rye_filter	SECCE7Rv1G0461810.1	Coverage	100
chr7R	40214369	40214394	.	+	PGSB	exon	.	ID=SECCE7Rv1G0461820.1.exon.1;Parent=SECCE7Rv1G0461820.1	SECCE7Rv1G0461820.1	1593	present	Chromosome	lo7-cs_q30_rye_filter	SECCE7Rv1G0461820.1	Coverage	100
chr7R	40282589	40283258	.	+	PGSB	exon	.	ID=SECCE7Rv1G0461830.1.exon.1;Parent=SECCE7Rv1G0461830.1	SECCE7Rv1G0461830.1	669	present	Chromosome	lo7-cs_q30_rye_filter	SECCE7Rv1G0461830.1	Coverage	100
chr7R	40536616	40536745	.	-	PGSB	exon	.	ID=SECCE7Rv1G0461840.1.exon.1;Parent=SECCE7Rv1G0461840.1	SECCE7Rv1G0461840.1	1296	present	Chromosome	lo7-cs_q30_rye_filter	SECCE7Rv1G0461840.1	Coverage	100
chr7R	40555728	40555819	.	+	PGSB	exon	.	ID=SECCE7Rv1G0461850.1.exon.1;Parent=SECCE7Rv1G0461850.1	SECCE7Rv1G0461850.1	264	present	Chromosome	lo7-cs_q30_rye_filter	SECCE7Rv1G0461850.1	Coverage	100
chr7R	40611998	40612089	.	+	PGSB	exon	.	ID=SECCE7Rv1G0461860.1.exon.1;Parent=SECCE7Rv1G0461860.1	SECCE7Rv1G0461860.1	2532	present	Chromosome	lo7-cs_q30_rye_filter	SECCE7Rv1G0461860.1	Coverage	100
chr7R	40989294	40989385	.	+	PGSB	exon	.	ID=SECCE7Rv1G0461870.1.exon.1;Parent=SECCE7Rv1G0461870.1	SECCE7Rv1G0461870.1	2532	present	Chromosome	lo7-cs_q30_rye_filter	SECCE7Rv1G0461870.1	Coverage	100
chr7R	41067275	41067366	.	+	PGSB	exon	.	ID=SECCE7Rv1G0461880.1.exon.1;Parent=SECCE7Rv1G0461880.1	SECCE7Rv1G0461880.1	2532	present	Chromosome	lo7-cs_q30_rye_filter	SECCE7Rv1G0461880.1	Coverage	100
chr7R	41090121	41090294	.	+	PGSB	exon	.	ID=SECCE7Rv1G0461890.1.exon.1;Parent=SECCE7Rv1G0461890.1	SECCE7Rv1G0461890.1	306	present	Chromosome	lo7-cs_q30_rye_filter	SECCE7Rv1G0461890.1	Coverage	100
chr7R	41195025	41196381	.	+	PGSB	exon	.	ID=SECCE7Rv1G0461900.1.exon.1;Parent=SECCE7Rv1G0461900.1	SECCE7Rv1G0461900.1	1356	present	Chromosome	lo7-cs_q30_rye_filter	SECCE7Rv1G0461900.1	Coverage	100
chr7R	41199085	41199166	.	-	PGSB	exon	.	ID=SECCE7Rv1G0461910.1.exon.1;Parent=SECCE7Rv1G0461910.1	SECCE7Rv1G0461910.1	375	present	Chromosome	lo7-cs_q30_rye_filter	SECCE7Rv1G0461910.1	Coverage	100
chr7R	41375340	41375541	.	-	PGSB	exon	.	ID=SECCE7Rv1G0461920.1.exon.1;Parent=SECCE7Rv1G0461920.1	SECCE7Rv1G0461920.1	201	present	Chromosome	lo7-cs_q30_rye_filter	SECCE7Rv1G0461920.1	Coverage	100
chr7R	41375630	41375702	.	-	PGSB	exon	.	ID=SECCE7Rv1G0461930.1.exon.1;Parent=SECCE7Rv1G0461930.1	SECCE7Rv1G0461930.1	585	present	Chromosome	lo7-cs_q30_rye_filter	SECCE7Rv1G0461930.1	Coverage	78.629
chr7R	41572119	41572465	.	+	PGSB	exon	.	ID=SECCE7Rv1G0461940.1.exon.1;Parent=SECCE7Rv1G0461940.1	SECCE7Rv1G0461940.1	1164	present	Chromosome	lo7-cs_q30_rye_filter	SECCE7Rv1G0461940.1	Coverage	100
chr7R	41575647	41575890	.	+	PGSB	exon	.	ID=SECCE7Rv1G0461950.1.exon.1;Parent=SECCE7Rv1G0461950.1	SECCE7Rv1G0461950.1	1956	present	Chromosome	lo7-cs_q30_rye_filter	SECCE7Rv1G0461950.1	Coverage	100
chr7R	41618008	41618770	.	-	PGSB	exon	.	ID=SECCE7Rv1G0461960.1.exon.1;Parent=SECCE7Rv1G0461960.1	SECCE7Rv1G0461960.1	762	present	Chromosome	lo7-cs_q30_rye_filter	SECCE7Rv1G0461960.1	Coverage	100
chr7R	41619144	41619513	.	-	PGSB	exon	.	ID=SECCE7Rv1G0461970.1.exon.1;Parent=SECCE7Rv1G0461970.1	SECCE7Rv1G0461970.1	369	present	Chromosome	lo7-cs_q30_rye_filter	SECCE7Rv1G0461970.1	Coverage	100
chr7R	41666552	41667209	.	+	PGSB	exon	.	ID=SECCE7Rv1G0461980.1.exon.1;Parent=SECCE7Rv1G0461980.1	SECCE7Rv1G0461980.1	657	present	Chromosome	lo7-cs_q30_rye_filter	SECCE7Rv1G0461980.1	Coverage	100
chr7R	41745120	41745414	.	+	PGSB	exon	.	ID=SECCE7Rv1G0461990.1.exon.1;Parent=SECCE7Rv1G0461990.1	SECCE7Rv1G0461990.1	6739	present	Chromosome	lo7-cs_q30_rye_filter	SECCE7Rv1G0461990.1	Coverage	99.9259
chr7R	41767899	41768051	.	-	PGSB	exon	.	ID=SECCE7Rv1G0462000.1.exon.1;Parent=SECCE7Rv1G0462000.1	SECCE7Rv1G0462000.1	219	present	Chromosome	lo7-cs_q30_rye_filter	SECCE7Rv1G0462000.1	Coverage	100
chr7R	41954675	41954892	.	+	PGSB	exon	.	ID=SECCE7Rv1G0462010.1.exon.1;Parent=SECCE7Rv1G0462010.1	SECCE7Rv1G0462010.1	1464	present	Chromosome	lo7-cs_q30_rye_filter	SECCE7Rv1G0462010.1	Coverage	100
chr7R	42000224	42000396	.	+	PGSB	exon	.	ID=SECCE7Rv1G0462020.1.exon.1;Parent=SECCE7Rv1G0462020.1	SECCE7Rv1G0462020.1	1284	present	Chromosome	lo7-cs_q30_rye_filter	SECCE7Rv1G0462020.1	Coverage	87.5256
chr7R	42155091	42155263	.	+	PGSB	exon	.	ID=SECCE7Rv1G0462030.1.exon.1;Parent=SECCE7Rv1G0462030.1	SECCE7Rv1G0462030.1	1325	present	Chromosome	lo7-cs_q30_rye_filter	SECCE7Rv1G0462030.1	Coverage	90.3204
chr7R	42377854	42378418	.	-	PGSB	exon	.	ID=SECCE7Rv1G0462040.1.exon.1;Parent=SECCE7Rv1G0462040.1	SECCE7Rv1G0462040.1	882	present	Chromosome	lo7-cs_q30_rye_filter	SECCE7Rv1G0462040.1	Coverage	100
chr7R	42383072	42383172	.	+	PGSB	exon	.	ID=SECCE7Rv1G0462050.1.exon.1;Parent=SECCE7Rv1G0462050.1	SECCE7Rv1G0462050.1	555	present	Chromosome	lo7-cs_q30_rye_filter	SECCE7Rv1G0462050.1	Coverage	100
chr7R	42425812	42425896	.	+	PGSB	exon	.	ID=SECCE7Rv1G0462060.1.exon.1;Parent=SECCE7Rv1G0462060.1	SECCE7Rv1G0462060.1	1266	present	Chromosome	lo7-cs_q30_rye_filter	SECCE7Rv1G0462060.1	Coverage	100
chr7R	42436414	42436702	.	+	PGSB	exon	.	ID=SECCE7Rv1G0462070.1.exon.1;Parent=SECCE7Rv1G0462070.1	SECCE7Rv1G0462070.1	288	present	Chromosome	lo7-cs_q30_rye_filter	SECCE7Rv1G0462070.1	Coverage	100
chr7R	42503784	42504345	.	-	PGSB	exon	.	ID=SECCE7Rv1G0462080.1.exon.1;Parent=SECCE7Rv1G0462080.1	SECCE7Rv1G0462080.1	561	present	Chromosome	lo7-cs_q30_rye_filter	SECCE7Rv1G0462080.1	Coverage	100
chr7R	42666026	42666206	.	+	PGSB	exon	.	ID=SECCE7Rv1G0462090.1.exon.1;Parent=SECCE7Rv1G0462090.1	SECCE7Rv1G0462090.1	837	present	Chromosome	lo7-cs_q30_rye_filter	SECCE7Rv1G0462090.1	Coverage	100
chr7R	42670135	42670648	.	+	PGSB	exon	.	ID=SECCE7Rv1G0462100.1.exon.1;Parent=SECCE7Rv1G0462100.1	SECCE7Rv1G0462100.1	513	present	Chromosome	lo7-cs_q30_rye_filter	SECCE7Rv1G0462100.1	Coverage	100
chr7R	42752989	42753191	.	+	PGSB	exon	.	ID=SECCE7Rv1G0462110.1.exon.1;Parent=SECCE7Rv1G0462110.1	SECCE7Rv1G0462110.1	1425	present	Chromosome	lo7-cs_q30_rye_filter	SECCE7Rv1G0462110.1	Coverage	100
chr7R	42764599	42764792	.	+	PGSB	exon	.	ID=SECCE7Rv1G0462120.1.exon.1;Parent=SECCE7Rv1G0462120.1	SECCE7Rv1G0462120.1	1518	present	Chromosome	lo7-cs_q30_rye_filter	SECCE7Rv1G0462120.1	Coverage	100
chr7R	42780896	42781136	.	+	PGSB	exon	.	ID=SECCE7Rv1G0462130.1.exon.1;Parent=SECCE7Rv1G0462130.1	SECCE7Rv1G0462130.1	1209	present	Chromosome	lo7-cs_q30_rye_filter	SECCE7Rv1G0462130.1	Coverage	100
chr7R	42785337	42785589	.	+	PGSB	exon	.	ID=SECCE7Rv1G0462140.1.exon.1;Parent=SECCE7Rv1G0462140.1	SECCE7Rv1G0462140.1	846	present	Chromosome	lo7-cs_q30_rye_filter	SECCE7Rv1G0462140.1	Coverage	100
chr7R	42846253	42846769	.	+	PGSB	exon	.	ID=SECCE7Rv1G0462150.1.exon.1;Parent=SECCE7Rv1G0462150.1	SECCE7Rv1G0462150.1	0	absent	Chromosome	lo7-cs_q30_rye_filter	SECCE7Rv1G0462150.1	Coverage	0
chr7R	43331492	43331711	.	+	PGSB	exon	.	ID=SECCE7Rv1G0462160.1.exon.1;Parent=SECCE7Rv1G0462160.1	SECCE7Rv1G0462160.1	1146	present	Chromosome	lo7-cs_q30_rye_filter	SECCE7Rv1G0462160.1	Coverage	100
chr7R	43342321	43342540	.	+	PGSB	exon	.	ID=SECCE7Rv1G0462170.1.exon.1;Parent=SECCE7Rv1G0462170.1	SECCE7Rv1G0462170.1	1188	present	Chromosome	lo7-cs_q30_rye_filter	SECCE7Rv1G0462170.1	Coverage	100
chr7R	43421083	43422061	.	-	PGSB	exon	.	ID=SECCE7Rv1G0462180.1.exon.1;Parent=SECCE7Rv1G0462180.1	SECCE7Rv1G0462180.1	1245	present	Chromosome	lo7-cs_q30_rye_filter	SECCE7Rv1G0462180.1	Coverage	100
chr7R	44005249	44006038	.	+	PGSB	exon	.	ID=SECCE7Rv1G0462190.1.exon.1;Parent=SECCE7Rv1G0462190.1	SECCE7Rv1G0462190.1	1677	present	Chromosome	lo7-cs_q30_rye_filter	SECCE7Rv1G0462190.1	Coverage	100
chr7R	44011614	44011917	.	-	PGSB	exon	.	ID=SECCE7Rv1G0462200.1.exon.1;Parent=SECCE7Rv1G0462200.1	SECCE7Rv1G0462200.1	2142	present	Chromosome	lo7-cs_q30_rye_filter	SECCE7Rv1G0462200.1	Coverage	100
chr7R	44076706	44076940	.	+	PGSB	exon	.	ID=SECCE7Rv1G0462210.1.exon.1;Parent=SECCE7Rv1G0462210.1	SECCE7Rv1G0462210.1	234	present	Chromosome	lo7-cs_q30_rye_filter	SECCE7Rv1G0462210.1	Coverage	100
chr7R	44291647	44292010	.	+	PGSB	exon	.	ID=SECCE7Rv1G0462220.1.exon.1;Parent=SECCE7Rv1G0462220.1	SECCE7Rv1G0462220.1	363	present	Chromosome	lo7-cs_q30_rye_filter	SECCE7Rv1G0462220.1	Coverage	100
chr7R	44295644	44295727	.	-	PGSB	exon	.	ID=SECCE7Rv1G0462230.1.exon.1;Parent=SECCE7Rv1G0462230.1	SECCE7Rv1G0462230.1	1227	present	Chromosome	lo7-cs_q30_rye_filter	SECCE7Rv1G0462230.1	Coverage	100
chr7R	44542430	44543234	.	+	PGSB	exon	.	ID=SECCE7Rv1G0462240.1.exon.1;Parent=SECCE7Rv1G0462240.1	SECCE7Rv1G0462240.1	804	present	Chromosome	lo7-cs_q30_rye_filter	SECCE7Rv1G0462240.1	Coverage	100
chr7R	44806414	44807026	.	-	PGSB	exon	.	ID=SECCE7Rv1G0462250.1.exon.1;Parent=SECCE7Rv1G0462250.1	SECCE7Rv1G0462250.1	1503	present	Chromosome	lo7-cs_q30_rye_filter	SECCE7Rv1G0462250.1	Coverage	100
chr7R	44863106	44863718	.	-	PGSB	exon	.	ID=SECCE7Rv1G0462260.1.exon.1;Parent=SECCE7Rv1G0462260.1	SECCE7Rv1G0462260.1	1527	present	Chromosome	lo7-cs_q30_rye_filter	SECCE7Rv1G0462260.1	Coverage	100
chr7R	45005790	45006351	.	-	PGSB	exon	.	ID=SECCE7Rv1G0462270.1.exon.1;Parent=SECCE7Rv1G0462270.1	SECCE7Rv1G0462270.1	561	present	Chromosome	lo7-cs_q30_rye_filter	SECCE7Rv1G0462270.1	Coverage	100
chr7R	45010704	45011247	.	+	PGSB	exon	.	ID=SECCE7Rv1G0462280.1.exon.1;Parent=SECCE7Rv1G0462280.1	SECCE7Rv1G0462280.1	543	present	Chromosome	lo7-cs_q30_rye_filter	SECCE7Rv1G0462280.1	Coverage	100
chr7R	45011259	45012174	.	+	PGSB	exon	.	ID=SECCE7Rv1G0462290.1.exon.1;Parent=SECCE7Rv1G0462290.1	SECCE7Rv1G0462290.1	915	present	Chromosome	lo7-cs_q30_rye_filter	SECCE7Rv1G0462290.1	Coverage	100
chr7R	45092309	45092434	.	+	PGSB	exon	.	ID=SECCE7Rv1G0462300.1.exon.1;Parent=SECCE7Rv1G0462300.1	SECCE7Rv1G0462300.1	1371	present	Chromosome	lo7-cs_q30_rye_filter	SECCE7Rv1G0462300.1	Coverage	100
chr7R	45100227	45100545	.	-	PGSB	exon	.	ID=SECCE7Rv1G0462310.1.exon.1;Parent=SECCE7Rv1G0462310.1	SECCE7Rv1G0462310.1	318	present	Chromosome	lo7-cs_q30_rye_filter	SECCE7Rv1G0462310.1	Coverage	100
chr7R	45146181	45146435	.	+	PGSB	exon	.	ID=SECCE7Rv1G0462320.1.exon.1;Parent=SECCE7Rv1G0462320.1	SECCE7Rv1G0462320.1	636	present	Chromosome	lo7-cs_q30_rye_filter	SECCE7Rv1G0462320.1	Coverage	100
chr7R	45147858	45148385	.	+	PGSB	exon	.	ID=SECCE7Rv1G0462330.1.exon.1;Parent=SECCE7Rv1G0462330.1	SECCE7Rv1G0462330.1	1110	present	Chromosome	lo7-cs_q30_rye_filter	SECCE7Rv1G0462330.1	Coverage	100
chr7R	45156425	45156455	.	+	PGSB	exon	.	ID=SECCE7Rv1G0462340.1.exon.1;Parent=SECCE7Rv1G0462340.1	SECCE7Rv1G0462340.1	1437	present	Chromosome	lo7-cs_q30_rye_filter	SECCE7Rv1G0462340.1	Coverage	100
chr7R	45227331	45227361	.	+	PGSB	exon	.	ID=SECCE7Rv1G0462350.1.exon.1;Parent=SECCE7Rv1G0462350.1	SECCE7Rv1G0462350.1	1434	present	Chromosome	lo7-cs_q30_rye_filter	SECCE7Rv1G0462350.1	Coverage	100
chr7R	45232246	45233560	.	+	PGSB	exon	.	ID=SECCE7Rv1G0462360.1.exon.1;Parent=SECCE7Rv1G0462360.1	SECCE7Rv1G0462360.1	1314	present	Chromosome	lo7-cs_q30_rye_filter	SECCE7Rv1G0462360.1	Coverage	100
chr7R	45291356	45292973	.	-	PGSB	exon	.	ID=SECCE7Rv1G0462370.1.exon.1;Parent=SECCE7Rv1G0462370.1	SECCE7Rv1G0462370.1	1617	present	Chromosome	lo7-cs_q30_rye_filter	SECCE7Rv1G0462370.1	Coverage	100
chr7R	45533360	45533685	.	+	PGSB	exon	.	ID=SECCE7Rv1G0462380.1.exon.1;Parent=SECCE7Rv1G0462380.1	SECCE7Rv1G0462380.1	2739	present	Chromosome	lo7-cs_q30_rye_filter	SECCE7Rv1G0462380.1	Coverage	100
chr7R	45556121	45556454	.	-	PGSB	exon	.	ID=SECCE7Rv1G0462390.1.exon.1;Parent=SECCE7Rv1G0462390.1	SECCE7Rv1G0462390.1	333	present	Chromosome	lo7-cs_q30_rye_filter	SECCE7Rv1G0462390.1	Coverage	100
chr7R	45559121	45559228	.	-	PGSB	exon	.	ID=SECCE7Rv1G0462400.1.exon.1;Parent=SECCE7Rv1G0462400.1	SECCE7Rv1G0462400.1	1371	present	Chromosome	lo7-cs_q30_rye_filter	SECCE7Rv1G0462400.1	Coverage	100
chr7R	45563439	45563534	.	-	PGSB	exon	.	ID=SECCE7Rv1G0462410.1.exon.1;Parent=SECCE7Rv1G0462410.1	SECCE7Rv1G0462410.1	1359	present	Chromosome	lo7-cs_q30_rye_filter	SECCE7Rv1G0462410.1	Coverage	100
chr7R	45679762	45680209	.	-	PGSB	exon	.	ID=SECCE7Rv1G0462420.1.exon.1;Parent=SECCE7Rv1G0462420.1	SECCE7Rv1G0462420.1	2886	present	Chromosome	lo7-cs_q30_rye_filter	SECCE7Rv1G0462420.1	Coverage	100
chr7R	45970605	45971482	.	+	PGSB	exon	.	ID=SECCE7Rv1G0462430.1.exon.1;Parent=SECCE7Rv1G0462430.1	SECCE7Rv1G0462430.1	1218	present	Chromosome	lo7-cs_q30_rye_filter	SECCE7Rv1G0462430.1	Coverage	100
chr7R	45972709	45972919	.	-	PGSB	exon	.	ID=SECCE7Rv1G0462440.1.exon.1;Parent=SECCE7Rv1G0462440.1	SECCE7Rv1G0462440.1	1134	present	Chromosome	lo7-cs_q30_rye_filter	SECCE7Rv1G0462440.1	Coverage	100
chr7R	45988519	45988645	.	+	PGSB	exon	.	ID=SECCE7Rv1G0462450.1.exon.1;Parent=SECCE7Rv1G0462450.1	SECCE7Rv1G0462450.1	1356	present	Chromosome	lo7-cs_q30_rye_filter	SECCE7Rv1G0462450.1	Coverage	88.1092
chr7R	45992696	45992885	.	-	PGSB	exon	.	ID=SECCE7Rv1G0462460.1.exon.1;Parent=SECCE7Rv1G0462460.1	SECCE7Rv1G0462460.1	561	present	Chromosome	lo7-cs_q30_rye_filter	SECCE7Rv1G0462460.1	Coverage	100
chr7R	46228323	46228512	.	-	PGSB	exon	.	ID=SECCE7Rv1G0462470.1.exon.1;Parent=SECCE7Rv1G0462470.1	SECCE7Rv1G0462470.1	482	present	Chromosome	lo7-cs_q30_rye_filter	SECCE7Rv1G0462470.1	Coverage	85.918
chr7R	46232740	46232893	.	-	PGSB	exon	.	ID=SECCE7Rv1G0462480.1.exon.1;Parent=SECCE7Rv1G0462480.1	SECCE7Rv1G0462480.1	5	absent	Chromosome	lo7-cs_q30_rye_filter	SECCE7Rv1G0462480.1	Coverage	1.41243
chr7R	46249371	46249383	.	+	PGSB	exon	.	ID=SECCE7Rv1G0462490.1.exon.1;Parent=SECCE7Rv1G0462490.1	SECCE7Rv1G0462490.1	967	present	Chromosome	lo7-cs_q30_rye_filter	SECCE7Rv1G0462490.1	Coverage	78.0468
chr7R	46256404	46256456	.	+	PGSB	exon	.	ID=SECCE7Rv1G0462500.1.exon.1;Parent=SECCE7Rv1G0462500.1	SECCE7Rv1G0462500.1	321	present	Chromosome	lo7-cs_q30_rye_filter	SECCE7Rv1G0462500.1	Coverage	37.5439
chr7R	46648412	46648515	.	+	PGSB	exon	.	ID=SECCE7Rv1G0462510.1.exon.1;Parent=SECCE7Rv1G0462510.1	SECCE7Rv1G0462510.1	0	absent	Chromosome	lo7-cs_q30_rye_filter	SECCE7Rv1G0462510.1	Coverage	0
chr7R	46656297	46656810	.	-	PGSB	exon	.	ID=SECCE7Rv1G0462520.1.exon.1;Parent=SECCE7Rv1G0462520.1	SECCE7Rv1G0462520.1	0	absent	Chromosome	lo7-cs_q30_rye_filter	SECCE7Rv1G0462520.1	Coverage	0
chr7R	46668233	46668264	.	+	PGSB	exon	.	ID=SECCE7Rv1G0462530.1.exon.1;Parent=SECCE7Rv1G0462530.1	SECCE7Rv1G0462530.1	0	absent	Chromosome	lo7-cs_q30_rye_filter	SECCE7Rv1G0462530.1	Coverage	0
chr7R	46696936	46700680	.	+	PGSB	exon	.	ID=SECCE7Rv1G0462540.1.exon.1;Parent=SECCE7Rv1G0462540.1	SECCE7Rv1G0462540.1	1174	present	Chromosome	lo7-cs_q30_rye_filter	SECCE7Rv1G0462540.1	Coverage	31.3568
chr7R	46857424	46857529	.	+	PGSB	exon	.	ID=SECCE7Rv1G0462550.1.exon.1;Parent=SECCE7Rv1G0462550.1	SECCE7Rv1G0462550.1	1707	present	Chromosome	lo7-cs_q30_rye_filter	SECCE7Rv1G0462550.1	Coverage	100
chr7R	46906865	46907063	.	-	PGSB	exon	.	ID=SECCE7Rv1G0462560.1.exon.1;Parent=SECCE7Rv1G0462560.1	SECCE7Rv1G0462560.1	0	absent	Chromosome	lo7-cs_q30_rye_filter	SECCE7Rv1G0462560.1	Coverage	0
chr7R	46987437	46988940	.	-	PGSB	exon	.	ID=SECCE7Rv1G0462570.1.exon.1;Parent=SECCE7Rv1G0462570.1	SECCE7Rv1G0462570.1	904	present	Chromosome	lo7-cs_q30_rye_filter	SECCE7Rv1G0462570.1	Coverage	60.1464
chr7R	46997318	46998539	.	-	PGSB	exon	.	ID=SECCE7Rv1G0462580.1.exon.1;Parent=SECCE7Rv1G0462580.1	SECCE7Rv1G0462580.1	3087	present	Chromosome	lo7-cs_q30_rye_filter	SECCE7Rv1G0462580.1	Coverage	100
chr7R	47090536	47090608	.	-	PGSB	exon	.	ID=SECCE7Rv1G0462590.1.exon.1;Parent=SECCE7Rv1G0462590.1	SECCE7Rv1G0462590.1	687	present	Chromosome	lo7-cs_q30_rye_filter	SECCE7Rv1G0462590.1	Coverage	100
chr7R	47122899	47124297	.	+	PGSB	exon	.	ID=SECCE7Rv1G0462600.1.exon.1;Parent=SECCE7Rv1G0462600.1	SECCE7Rv1G0462600.1	1848	present	Chromosome	lo7-cs_q30_rye_filter	SECCE7Rv1G0462600.1	Coverage	95.2087
chr7R	47165881	47166265	.	-	PGSB	exon	.	ID=SECCE7Rv1G0462610.1.exon.1;Parent=SECCE7Rv1G0462610.1	SECCE7Rv1G0462610.1	0	absent	Chromosome	lo7-cs_q30_rye_filter	SECCE7Rv1G0462610.1	Coverage	0
chr7R	47225028	47225250	.	+	PGSB	exon	.	ID=SECCE7Rv1G0462620.1.exon.1;Parent=SECCE7Rv1G0462620.1	SECCE7Rv1G0462620.1	0	absent	Chromosome	lo7-cs_q30_rye_filter	SECCE7Rv1G0462620.1	Coverage	0
chr7R	47317272	47317647	.	+	PGSB	exon	.	ID=SECCE7Rv1G0462630.1.exon.1;Parent=SECCE7Rv1G0462630.1	SECCE7Rv1G0462630.1	375	present	Chromosome	lo7-cs_q30_rye_filter	SECCE7Rv1G0462630.1	Coverage	100
chr7R	47511762	47512035	.	+	PGSB	exon	.	ID=SECCE7Rv1G0462640.1.exon.1;Parent=SECCE7Rv1G0462640.1	SECCE7Rv1G0462640.1	273	present	Chromosome	lo7-cs_q30_rye_filter	SECCE7Rv1G0462640.1	Coverage	100
chr7R	47515675	47515747	.	-	PGSB	exon	.	ID=SECCE7Rv1G0462650.1.exon.1;Parent=SECCE7Rv1G0462650.1	SECCE7Rv1G0462650.1	699	present	Chromosome	lo7-cs_q30_rye_filter	SECCE7Rv1G0462650.1	Coverage	100
chr7R	47697762	47698062	.	-	PGSB	exon	.	ID=SECCE7Rv1G0462660.1.exon.1;Parent=SECCE7Rv1G0462660.1	SECCE7Rv1G0462660.1	293	present	Chromosome	lo7-cs_q30_rye_filter	SECCE7Rv1G0462660.1	Coverage	97.6667
chr7R	47837914	47838061	.	+	PGSB	exon	.	ID=SECCE7Rv1G0462670.1.exon.1;Parent=SECCE7Rv1G0462670.1	SECCE7Rv1G0462670.1	612	present	Chromosome	lo7-cs_q30_rye_filter	SECCE7Rv1G0462670.1	Coverage	88.3117
chr7R	47855965	47856043	.	+	PGSB	exon	.	ID=SECCE7Rv1G0462680.1.exon.1;Parent=SECCE7Rv1G0462680.1	SECCE7Rv1G0462680.1	601	present	Chromosome	lo7-cs_q30_rye_filter	SECCE7Rv1G0462680.1	Coverage	56.4319
chr7R	47859883	47860489	.	-	PGSB	exon	.	ID=SECCE7Rv1G0462690.1.exon.1;Parent=SECCE7Rv1G0462690.1	SECCE7Rv1G0462690.1	3752	present	Chromosome	lo7-cs_q30_rye_filter	SECCE7Rv1G0462690.1	Coverage	75.4322
chr7R	48007643	48007907	.	-	PGSB	exon	.	ID=SECCE7Rv1G0462700.1.exon.1;Parent=SECCE7Rv1G0462700.1	SECCE7Rv1G0462700.1	2013	present	Chromosome	lo7-cs_q30_rye_filter	SECCE7Rv1G0462700.1	Coverage	100
chr7R	48015357	48015777	.	+	PGSB	exon	.	ID=SECCE7Rv1G0462710.1.exon.1;Parent=SECCE7Rv1G0462710.1	SECCE7Rv1G0462710.1	0	absent	Chromosome	lo7-cs_q30_rye_filter	SECCE7Rv1G0462710.1	Coverage	0
chr7R	48267267	48267353	.	+	PGSB	exon	.	ID=SECCE7Rv1G0462720.1.exon.1;Parent=SECCE7Rv1G0462720.1	SECCE7Rv1G0462720.1	1039	present	Chromosome	lo7-cs_q30_rye_filter	SECCE7Rv1G0462720.1	Coverage	68.7169
chr7R	48278208	48278676	.	+	PGSB	exon	.	ID=SECCE7Rv1G0462730.1.exon.1;Parent=SECCE7Rv1G0462730.1	SECCE7Rv1G0462730.1	468	present	Chromosome	lo7-cs_q30_rye_filter	SECCE7Rv1G0462730.1	Coverage	100
chr7R	48280251	48280317	.	-	PGSB	exon	.	ID=SECCE7Rv1G0462740.1.exon.1;Parent=SECCE7Rv1G0462740.1	SECCE7Rv1G0462740.1	992	present	Chromosome	lo7-cs_q30_rye_filter	SECCE7Rv1G0462740.1	Coverage	87.478
chr7R	48723179	48724233	.	+	PGSB	exon	.	ID=SECCE7Rv1G0462750.1.exon.1;Parent=SECCE7Rv1G0462750.1	SECCE7Rv1G0462750.1	546	present	Chromosome	lo7-cs_q30_rye_filter	SECCE7Rv1G0462750.1	Coverage	51.8027
chr7R	48788353	48788391	.	-	PGSB	exon	.	ID=SECCE7Rv1G0462760.1.exon.1;Parent=SECCE7Rv1G0462760.1	SECCE7Rv1G0462760.1	326	present	Chromosome	lo7-cs_q30_rye_filter	SECCE7Rv1G0462760.1	Coverage	85.5643
chr7R	48795675	48796749	.	+	PGSB	exon	.	ID=SECCE7Rv1G0462770.1.exon.1;Parent=SECCE7Rv1G0462770.1	SECCE7Rv1G0462770.1	870	present	Chromosome	lo7-cs_q30_rye_filter	SECCE7Rv1G0462770.1	Coverage	81.0056
chr7R	48812097	48813366	.	+	PGSB	exon	.	ID=SECCE7Rv1G0462780.1.exon.1;Parent=SECCE7Rv1G0462780.1	SECCE7Rv1G0462780.1	495	present	Chromosome	lo7-cs_q30_rye_filter	SECCE7Rv1G0462780.1	Coverage	33.4008
chr7R	48815165	48815741	.	-	PGSB	exon	.	ID=SECCE7Rv1G0462790.1.exon.1;Parent=SECCE7Rv1G0462790.1	SECCE7Rv1G0462790.1	185	present	Chromosome	lo7-cs_q30_rye_filter	SECCE7Rv1G0462790.1	Coverage	26.9287
chr7R	48827507	48827669	.	+	PGSB	exon	.	ID=SECCE7Rv1G0462800.1.exon.1;Parent=SECCE7Rv1G0462800.1	SECCE7Rv1G0462800.1	333	present	Chromosome	lo7-cs_q30_rye_filter	SECCE7Rv1G0462800.1	Coverage	100
chr7R	48829442	48829915	.	-	PGSB	exon	.	ID=SECCE7Rv1G0462810.1.exon.1;Parent=SECCE7Rv1G0462810.1	SECCE7Rv1G0462810.1	543	present	Chromosome	lo7-cs_q30_rye_filter	SECCE7Rv1G0462810.1	Coverage	100
chr7R	48849070	48849724	.	-	PGSB	exon	.	ID=SECCE7Rv1G0462820.1.exon.1;Parent=SECCE7Rv1G0462820.1	SECCE7Rv1G0462820.1	626	present	Chromosome	lo7-cs_q30_rye_filter	SECCE7Rv1G0462820.1	Coverage	95.7187
chr7R	48853607	48854291	.	-	PGSB	exon	.	ID=SECCE7Rv1G0462830.1.exon.1;Parent=SECCE7Rv1G0462830.1	SECCE7Rv1G0462830.1	537	present	Chromosome	lo7-cs_q30_rye_filter	SECCE7Rv1G0462830.1	Coverage	78.5088
chr7R	48945380	48945662	.	+	PGSB	exon	.	ID=SECCE7Rv1G0462840.1.exon.1;Parent=SECCE7Rv1G0462840.1	SECCE7Rv1G0462840.1	1229	present	Chromosome	lo7-cs_q30_rye_filter	SECCE7Rv1G0462840.1	Coverage	99.6756
chr7R	48963548	48963848	.	+	PGSB	exon	.	ID=SECCE7Rv1G0462850.1.exon.1;Parent=SECCE7Rv1G0462850.1	SECCE7Rv1G0462850.1	300	present	Chromosome	lo7-cs_q30_rye_filter	SECCE7Rv1G0462850.1	Coverage	100
chr7R	48969626	48969902	.	+	PGSB	exon	.	ID=SECCE7Rv1G0462860.1.exon.1;Parent=SECCE7Rv1G0462860.1	SECCE7Rv1G0462860.1	1245	present	Chromosome	lo7-cs_q30_rye_filter	SECCE7Rv1G0462860.1	Coverage	100
chr7R	49101505	49101869	.	+	PGSB	exon	.	ID=SECCE7Rv1G0462870.1.exon.1;Parent=SECCE7Rv1G0462870.1	SECCE7Rv1G0462870.1	1056	present	Chromosome	lo7-cs_q30_rye_filter	SECCE7Rv1G0462870.1	Coverage	100
chr7R	49542120	49542495	.	-	PGSB	exon	.	ID=SECCE7Rv1G0462880.1.exon.1;Parent=SECCE7Rv1G0462880.1	SECCE7Rv1G0462880.1	375	present	Chromosome	lo7-cs_q30_rye_filter	SECCE7Rv1G0462880.1	Coverage	100
chr7R	49576325	49576643	.	+	PGSB	exon	.	ID=SECCE7Rv1G0462890.1.exon.1;Parent=SECCE7Rv1G0462890.1	SECCE7Rv1G0462890.1	318	present	Chromosome	lo7-cs_q30_rye_filter	SECCE7Rv1G0462890.1	Coverage	100
chr7R	49733397	49733997	.	+	PGSB	exon	.	ID=SECCE7Rv1G0462900.1.exon.1;Parent=SECCE7Rv1G0462900.1	SECCE7Rv1G0462900.1	518	present	Chromosome	lo7-cs_q30_rye_filter	SECCE7Rv1G0462900.1	Coverage	86.3333
chr7R	49820821	49821421	.	+	PGSB	exon	.	ID=SECCE7Rv1G0462910.1.exon.1;Parent=SECCE7Rv1G0462910.1	SECCE7Rv1G0462910.1	595	present	Chromosome	lo7-cs_q30_rye_filter	SECCE7Rv1G0462910.1	Coverage	99.1667
chr7R	49900600	49901200	.	+	PGSB	exon	.	ID=SECCE7Rv1G0462920.1.exon.1;Parent=SECCE7Rv1G0462920.1	SECCE7Rv1G0462920.1	532	present	Chromosome	lo7-cs_q30_rye_filter	SECCE7Rv1G0462920.1	Coverage	88.6667
chr7R	49965030	49965639	.	+	PGSB	exon	.	ID=SECCE7Rv1G0462930.1.exon.1;Parent=SECCE7Rv1G0462930.1	SECCE7Rv1G0462930.1	609	present	Chromosome	lo7-cs_q30_rye_filter	SECCE7Rv1G0462930.1	Coverage	100
chr7R	50100614	50100848	.	+	PGSB	exon	.	ID=SECCE7Rv1G0462940.1.exon.1;Parent=SECCE7Rv1G0462940.1	SECCE7Rv1G0462940.1	234	present	Chromosome	lo7-cs_q30_rye_filter	SECCE7Rv1G0462940.1	Coverage	100
chr7R	50181456	50181957	.	-	PGSB	exon	.	ID=SECCE7Rv1G0462950.1.exon.1;Parent=SECCE7Rv1G0462950.1	SECCE7Rv1G0462950.1	501	present	Chromosome	lo7-cs_q30_rye_filter	SECCE7Rv1G0462950.1	Coverage	100
chr7R	50182983	50183376	.	-	PGSB	exon	.	ID=SECCE7Rv1G0462960.1.exon.1;Parent=SECCE7Rv1G0462960.1	SECCE7Rv1G0462960.1	393	present	Chromosome	lo7-cs_q30_rye_filter	SECCE7Rv1G0462960.1	Coverage	100
chr7R	50224755	50225145	.	+	PGSB	exon	.	ID=SECCE7Rv1G0462970.1.exon.1;Parent=SECCE7Rv1G0462970.1	SECCE7Rv1G0462970.1	390	present	Chromosome	lo7-cs_q30_rye_filter	SECCE7Rv1G0462970.1	Coverage	100
chr7R	50233487	50234573	.	-	PGSB	exon	.	ID=SECCE7Rv1G0462980.1.exon.1;Parent=SECCE7Rv1G0462980.1	SECCE7Rv1G0462980.1	1149	present	Chromosome	lo7-cs_q30_rye_filter	SECCE7Rv1G0462980.1	Coverage	100
chr7R	50237159	50237163	.	-	PGSB	exon	.	ID=SECCE7Rv1G0462990.1.exon.1;Parent=SECCE7Rv1G0462990.1	SECCE7Rv1G0462990.1	1236	present	Chromosome	lo7-cs_q30_rye_filter	SECCE7Rv1G0462990.1	Coverage	100
chr7R	50279066	50279720	.	-	PGSB	exon	.	ID=SECCE7Rv1G0463000.1.exon.1;Parent=SECCE7Rv1G0463000.1	SECCE7Rv1G0463000.1	654	present	Chromosome	lo7-cs_q30_rye_filter	SECCE7Rv1G0463000.1	Coverage	100
chr7R	50607240	50607762	.	+	PGSB	exon	.	ID=SECCE7Rv1G0463010.1.exon.1;Parent=SECCE7Rv1G0463010.1	SECCE7Rv1G0463010.1	522	present	Chromosome	lo7-cs_q30_rye_filter	SECCE7Rv1G0463010.1	Coverage	100
chr7R	50611924	50612203	.	-	PGSB	exon	.	ID=SECCE7Rv1G0463020.1.exon.1;Parent=SECCE7Rv1G0463020.1	SECCE7Rv1G0463020.1	279	present	Chromosome	lo7-cs_q30_rye_filter	SECCE7Rv1G0463020.1	Coverage	100
chr7R	50648993	50649119	.	-	PGSB	exon	.	ID=SECCE7Rv1G0463030.1.exon.1;Parent=SECCE7Rv1G0463030.1	SECCE7Rv1G0463030.1	234	present	Chromosome	lo7-cs_q30_rye_filter	SECCE7Rv1G0463030.1	Coverage	100
chr7R	50743842	50744217	.	+	PGSB	exon	.	ID=SECCE7Rv1G0463040.1.exon.1;Parent=SECCE7Rv1G0463040.1	SECCE7Rv1G0463040.1	2313	present	Chromosome	lo7-cs_q30_rye_filter	SECCE7Rv1G0463040.1	Coverage	100
chr7R	50764059	50764458	.	+	PGSB	exon	.	ID=SECCE7Rv1G0463050.1.exon.1;Parent=SECCE7Rv1G0463050.1	SECCE7Rv1G0463050.1	399	present	Chromosome	lo7-cs_q30_rye_filter	SECCE7Rv1G0463050.1	Coverage	100
chr7R	50852932	50853331	.	+	PGSB	exon	.	ID=SECCE7Rv1G0463060.1.exon.1;Parent=SECCE7Rv1G0463060.1	SECCE7Rv1G0463060.1	399	present	Chromosome	lo7-cs_q30_rye_filter	SECCE7Rv1G0463060.1	Coverage	100
chr7R	50869535	50869916	.	+	PGSB	exon	.	ID=SECCE7Rv1G0463070.1.exon.1;Parent=SECCE7Rv1G0463070.1	SECCE7Rv1G0463070.1	0	absent	Chromosome	lo7-cs_q30_rye_filter	SECCE7Rv1G0463070.1	Coverage	0
chr7R	50969983	50970436	.	+	PGSB	exon	.	ID=SECCE7Rv1G0463080.1.exon.1;Parent=SECCE7Rv1G0463080.1	SECCE7Rv1G0463080.1	0	absent	Chromosome	lo7-cs_q30_rye_filter	SECCE7Rv1G0463080.1	Coverage	0
chr7R	50992913	50993315	.	+	PGSB	exon	.	ID=SECCE7Rv1G0463090.1.exon.1;Parent=SECCE7Rv1G0463090.1	SECCE7Rv1G0463090.1	163	present	Chromosome	lo7-cs_q30_rye_filter	SECCE7Rv1G0463090.1	Coverage	40.5473
chr7R	51052908	51052997	.	-	PGSB	exon	.	ID=SECCE7Rv1G0463100.1.exon.1;Parent=SECCE7Rv1G0463100.1	SECCE7Rv1G0463100.1	1105	present	Chromosome	lo7-cs_q30_rye_filter	SECCE7Rv1G0463100.1	Coverage	65.5397
chr7R	51124278	51126555	.	-	PGSB	exon	.	ID=SECCE7Rv1G0463110.1.exon.1;Parent=SECCE7Rv1G0463110.1	SECCE7Rv1G0463110.1	2508	present	Chromosome	lo7-cs_q30_rye_filter	SECCE7Rv1G0463110.1	Coverage	100
chr7R	51218680	51219031	.	+	PGSB	exon	.	ID=SECCE7Rv1G0463120.1.exon.1;Parent=SECCE7Rv1G0463120.1	SECCE7Rv1G0463120.1	351	present	Chromosome	lo7-cs_q30_rye_filter	SECCE7Rv1G0463120.1	Coverage	100
chr7R	51285488	51286313	.	-	PGSB	exon	.	ID=SECCE7Rv1G0463130.1.exon.1;Parent=SECCE7Rv1G0463130.1	SECCE7Rv1G0463130.1	500	present	Chromosome	lo7-cs_q30_rye_filter	SECCE7Rv1G0463130.1	Coverage	36.7107
chr7R	51300128	51300341	.	+	PGSB	exon	.	ID=SECCE7Rv1G0463140.1.exon.1;Parent=SECCE7Rv1G0463140.1	SECCE7Rv1G0463140.1	0	absent	Chromosome	lo7-cs_q30_rye_filter	SECCE7Rv1G0463140.1	Coverage	0
chr7R	51354523	51355393	.	-	PGSB	exon	.	ID=SECCE7Rv1G0463150.1.exon.1;Parent=SECCE7Rv1G0463150.1	SECCE7Rv1G0463150.1	651	present	Chromosome	lo7-cs_q30_rye_filter	SECCE7Rv1G0463150.1	Coverage	45.7806
chr7R	51363177	51363237	.	+	PGSB	exon	.	ID=SECCE7Rv1G0463160.1.exon.1;Parent=SECCE7Rv1G0463160.1	SECCE7Rv1G0463160.1	0	absent	Chromosome	lo7-cs_q30_rye_filter	SECCE7Rv1G0463160.1	Coverage	0
chr7R	51451592	51451936	.	+	PGSB	exon	.	ID=SECCE7Rv1G0463170.1.exon.1;Parent=SECCE7Rv1G0463170.1	SECCE7Rv1G0463170.1	0	absent	Chromosome	lo7-cs_q30_rye_filter	SECCE7Rv1G0463170.1	Coverage	0
chr7R	51453295	51453445	.	-	PGSB	exon	.	ID=SECCE7Rv1G0463180.1.exon.1;Parent=SECCE7Rv1G0463180.1	SECCE7Rv1G0463180.1	108	present	Chromosome	lo7-cs_q30_rye_filter	SECCE7Rv1G0463180.1	Coverage	21.0526
chr7R	51536004	51536059	.	+	PGSB	exon	.	ID=SECCE7Rv1G0463190.1.exon.1;Parent=SECCE7Rv1G0463190.1	SECCE7Rv1G0463190.1	414	present	Chromosome	lo7-cs_q30_rye_filter	SECCE7Rv1G0463190.1	Coverage	100
chr7R	51547499	51547673	.	+	PGSB	exon	.	ID=SECCE7Rv1G0463200.1.exon.1;Parent=SECCE7Rv1G0463200.1	SECCE7Rv1G0463200.1	891	present	Chromosome	lo7-cs_q30_rye_filter	SECCE7Rv1G0463200.1	Coverage	100
chr7R	51601140	51601500	.	-	PGSB	exon	.	ID=SECCE7Rv1G0463210.1.exon.1;Parent=SECCE7Rv1G0463210.1	SECCE7Rv1G0463210.1	585	present	Chromosome	lo7-cs_q30_rye_filter	SECCE7Rv1G0463210.1	Coverage	42.5764
chr7R	51693069	51693645	.	+	PGSB	exon	.	ID=SECCE7Rv1G0463220.1.exon.1;Parent=SECCE7Rv1G0463220.1	SECCE7Rv1G0463220.1	576	present	Chromosome	lo7-cs_q30_rye_filter	SECCE7Rv1G0463220.1	Coverage	100
chr7R	51846773	51847082	.	-	PGSB	exon	.	ID=SECCE7Rv1G0463230.1.exon.1;Parent=SECCE7Rv1G0463230.1	SECCE7Rv1G0463230.1	301	present	Chromosome	lo7-cs_q30_rye_filter	SECCE7Rv1G0463230.1	Coverage	97.411
chr7R	51851711	51853508	.	+	PGSB	exon	.	ID=SECCE7Rv1G0463240.1.exon.1;Parent=SECCE7Rv1G0463240.1	SECCE7Rv1G0463240.1	1039	present	Chromosome	lo7-cs_q30_rye_filter	SECCE7Rv1G0463240.1	Coverage	57.8186
chr7R	51877656	51877742	.	+	PGSB	exon	.	ID=SECCE7Rv1G0463250.1.exon.1;Parent=SECCE7Rv1G0463250.1	SECCE7Rv1G0463250.1	1374	present	Chromosome	lo7-cs_q30_rye_filter	SECCE7Rv1G0463250.1	Coverage	100
chr7R	51938249	51938304	.	+	PGSB	exon	.	ID=SECCE7Rv1G0463260.1.exon.1;Parent=SECCE7Rv1G0463260.1	SECCE7Rv1G0463260.1	109	present	Chromosome	lo7-cs_q30_rye_filter	SECCE7Rv1G0463260.1	Coverage	27.7354
chr7R	51950232	51950796	.	-	PGSB	exon	.	ID=SECCE7Rv1G0463270.1.exon.1;Parent=SECCE7Rv1G0463270.1	SECCE7Rv1G0463270.1	210	present	Chromosome	lo7-cs_q30_rye_filter	SECCE7Rv1G0463270.1	Coverage	37.234
chr7R	51953499	51954552	.	-	PGSB	exon	.	ID=SECCE7Rv1G0463280.1.exon.1;Parent=SECCE7Rv1G0463280.1	SECCE7Rv1G0463280.1	0	absent	Chromosome	lo7-cs_q30_rye_filter	SECCE7Rv1G0463280.1	Coverage	0
chr7R	51972408	51974136	.	-	PGSB	exon	.	ID=SECCE7Rv1G0463290.1.exon.1;Parent=SECCE7Rv1G0463290.1	SECCE7Rv1G0463290.1	0	absent	Chromosome	lo7-cs_q30_rye_filter	SECCE7Rv1G0463290.1	Coverage	0
chr7R	51982711	51983056	.	-	PGSB	exon	.	ID=SECCE7Rv1G0463300.1.exon.1;Parent=SECCE7Rv1G0463300.1	SECCE7Rv1G0463300.1	0	absent	Chromosome	lo7-cs_q30_rye_filter	SECCE7Rv1G0463300.1	Coverage	0
chr7R	51985882	51987014	.	+	PGSB	exon	.	ID=SECCE7Rv1G0463310.1.exon.1;Parent=SECCE7Rv1G0463310.1	SECCE7Rv1G0463310.1	517	present	Chromosome	lo7-cs_q30_rye_filter	SECCE7Rv1G0463310.1	Coverage	31.7958
chr7R	52094962	52095496	.	+	PGSB	exon	.	ID=SECCE7Rv1G0463320.1.exon.1;Parent=SECCE7Rv1G0463320.1	SECCE7Rv1G0463320.1	534	present	Chromosome	lo7-cs_q30_rye_filter	SECCE7Rv1G0463320.1	Coverage	100
chr7R	52100676	52100826	.	-	PGSB	exon	.	ID=SECCE7Rv1G0463330.1.exon.1;Parent=SECCE7Rv1G0463330.1	SECCE7Rv1G0463330.1	1950	present	Chromosome	lo7-cs_q30_rye_filter	SECCE7Rv1G0463330.1	Coverage	69.0755
chr7R	52177185	52177863	.	+	PGSB	exon	.	ID=SECCE7Rv1G0463340.1.exon.1;Parent=SECCE7Rv1G0463340.1	SECCE7Rv1G0463340.1	0	absent	Chromosome	lo7-cs_q30_rye_filter	SECCE7Rv1G0463340.1	Coverage	0
chr7R	52178624	52178729	.	-	PGSB	exon	.	ID=SECCE7Rv1G0463350.1.exon.1;Parent=SECCE7Rv1G0463350.1	SECCE7Rv1G0463350.1	91	present	Chromosome	lo7-cs_q30_rye_filter	SECCE7Rv1G0463350.1	Coverage	37.4486
chr7R	52179033	52179468	.	+	PGSB	exon	.	ID=SECCE7Rv1G0463360.1.exon.1;Parent=SECCE7Rv1G0463360.1	SECCE7Rv1G0463360.1	425	present	Chromosome	lo7-cs_q30_rye_filter	SECCE7Rv1G0463360.1	Coverage	97.7011
chr7R	52361156	52361462	.	+	PGSB	exon	.	ID=SECCE7Rv1G0463370.1.exon.1;Parent=SECCE7Rv1G0463370.1	SECCE7Rv1G0463370.1	306	present	Chromosome	lo7-cs_q30_rye_filter	SECCE7Rv1G0463370.1	Coverage	100
chr7R	52365740	52366043	.	+	PGSB	exon	.	ID=SECCE7Rv1G0463380.1.exon.1;Parent=SECCE7Rv1G0463380.1	SECCE7Rv1G0463380.1	303	present	Chromosome	lo7-cs_q30_rye_filter	SECCE7Rv1G0463380.1	Coverage	100
chr7R	52367092	52369356	.	-	PGSB	exon	.	ID=SECCE7Rv1G0463390.1.exon.1;Parent=SECCE7Rv1G0463390.1	SECCE7Rv1G0463390.1	2917	present	Chromosome	lo7-cs_q30_rye_filter	SECCE7Rv1G0463390.1	Coverage	76.743
chr7R	52558507	52558861	.	+	PGSB	exon	.	ID=SECCE7Rv1G0463400.1.exon.1;Parent=SECCE7Rv1G0463400.1	SECCE7Rv1G0463400.1	1338	present	Chromosome	lo7-cs_q30_rye_filter	SECCE7Rv1G0463400.1	Coverage	77.2964
chr7R	52568140	52569718	.	+	PGSB	exon	.	ID=SECCE7Rv1G0463410.1.exon.1;Parent=SECCE7Rv1G0463410.1	SECCE7Rv1G0463410.1	682	present	Chromosome	lo7-cs_q30_rye_filter	SECCE7Rv1G0463410.1	Coverage	43.2193
chr7R	52690063	52691641	.	-	PGSB	exon	.	ID=SECCE7Rv1G0463420.1.exon.1;Parent=SECCE7Rv1G0463420.1	SECCE7Rv1G0463420.1	1356	present	Chromosome	lo7-cs_q30_rye_filter	SECCE7Rv1G0463420.1	Coverage	85.9316
chr7R	53232425	53234003	.	+	PGSB	exon	.	ID=SECCE7Rv1G0463430.1.exon.1;Parent=SECCE7Rv1G0463430.1	SECCE7Rv1G0463430.1	0	absent	Chromosome	lo7-cs_q30_rye_filter	SECCE7Rv1G0463430.1	Coverage	0
chr7R	53281635	53281869	.	+	PGSB	exon	.	ID=SECCE7Rv1G0463440.1.exon.1;Parent=SECCE7Rv1G0463440.1	SECCE7Rv1G0463440.1	0	absent	Chromosome	lo7-cs_q30_rye_filter	SECCE7Rv1G0463440.1	Coverage	0
chr7R	53471566	53473132	.	+	PGSB	exon	.	ID=SECCE7Rv1G0463450.1.exon.1;Parent=SECCE7Rv1G0463450.1	SECCE7Rv1G0463450.1	0	absent	Chromosome	lo7-cs_q30_rye_filter	SECCE7Rv1G0463450.1	Coverage	0
chr7R	53663041	53664607	.	+	PGSB	exon	.	ID=SECCE7Rv1G0463460.1.exon.1;Parent=SECCE7Rv1G0463460.1	SECCE7Rv1G0463460.1	0	absent	Chromosome	lo7-cs_q30_rye_filter	SECCE7Rv1G0463460.1	Coverage	0
chr7R	53918534	53919158	.	+	PGSB	exon	.	ID=SECCE7Rv1G0463470.1.exon.1;Parent=SECCE7Rv1G0463470.1	SECCE7Rv1G0463470.1	0	absent	Chromosome	lo7-cs_q30_rye_filter	SECCE7Rv1G0463470.1	Coverage	0
chr7R	53921310	53922888	.	+	PGSB	exon	.	ID=SECCE7Rv1G0463480.1.exon.1;Parent=SECCE7Rv1G0463480.1	SECCE7Rv1G0463480.1	983	present	Chromosome	lo7-cs_q30_rye_filter	SECCE7Rv1G0463480.1	Coverage	62.294
chr7R	54193376	54194942	.	+	PGSB	exon	.	ID=SECCE7Rv1G0463490.1.exon.1;Parent=SECCE7Rv1G0463490.1	SECCE7Rv1G0463490.1	758	present	Chromosome	lo7-cs_q30_rye_filter	SECCE7Rv1G0463490.1	Coverage	48.4036
chr7R	54497854	54499420	.	+	PGSB	exon	.	ID=SECCE7Rv1G0463500.1.exon.1;Parent=SECCE7Rv1G0463500.1	SECCE7Rv1G0463500.1	372	present	Chromosome	lo7-cs_q30_rye_filter	SECCE7Rv1G0463500.1	Coverage	23.7548
chr7R	54517139	54518750	.	+	PGSB	exon	.	ID=SECCE7Rv1G0463510.1.exon.1;Parent=SECCE7Rv1G0463510.1	SECCE7Rv1G0463510.1	1611	present	Chromosome	lo7-cs_q30_rye_filter	SECCE7Rv1G0463510.1	Coverage	100
chr7R	54523870	54524428	.	-	PGSB	exon	.	ID=SECCE7Rv1G0463520.1.exon.1;Parent=SECCE7Rv1G0463520.1	SECCE7Rv1G0463520.1	558	present	Chromosome	lo7-cs_q30_rye_filter	SECCE7Rv1G0463520.1	Coverage	100
chr7R	54524647	54524845	.	-	PGSB	exon	.	ID=SECCE7Rv1G0463530.1.exon.1;Parent=SECCE7Rv1G0463530.1	SECCE7Rv1G0463530.1	198	present	Chromosome	lo7-cs_q30_rye_filter	SECCE7Rv1G0463530.1	Coverage	100
chr7R	54525049	54525361	.	-	PGSB	exon	.	ID=SECCE7Rv1G0463540.1.exon.1;Parent=SECCE7Rv1G0463540.1	SECCE7Rv1G0463540.1	438	present	Chromosome	lo7-cs_q30_rye_filter	SECCE7Rv1G0463540.1	Coverage	100
chr7R	54564332	54564494	.	+	PGSB	exon	.	ID=SECCE7Rv1G0463550.1.exon.1;Parent=SECCE7Rv1G0463550.1	SECCE7Rv1G0463550.1	162	present	Chromosome	lo7-cs_q30_rye_filter	SECCE7Rv1G0463550.1	Coverage	100
chr7R	54671248	54671581	.	+	PGSB	exon	.	ID=SECCE7Rv1G0463560.1.exon.1;Parent=SECCE7Rv1G0463560.1	SECCE7Rv1G0463560.1	996	present	Chromosome	lo7-cs_q30_rye_filter	SECCE7Rv1G0463560.1	Coverage	100
chr7R	54738908	54739274	.	-	PGSB	exon	.	ID=SECCE7Rv1G0463570.1.exon.1;Parent=SECCE7Rv1G0463570.1	SECCE7Rv1G0463570.1	366	present	Chromosome	lo7-cs_q30_rye_filter	SECCE7Rv1G0463570.1	Coverage	100
chr7R	54813227	54813554	.	-	PGSB	exon	.	ID=SECCE7Rv1G0463580.1.exon.1;Parent=SECCE7Rv1G0463580.1	SECCE7Rv1G0463580.1	327	present	Chromosome	lo7-cs_q30_rye_filter	SECCE7Rv1G0463580.1	Coverage	100
chr7R	54932969	54933815	.	+	PGSB	exon	.	ID=SECCE7Rv1G0463590.1.exon.1;Parent=SECCE7Rv1G0463590.1	SECCE7Rv1G0463590.1	846	present	Chromosome	lo7-cs_q30_rye_filter	SECCE7Rv1G0463590.1	Coverage	100
chr7R	55006781	55007570	.	+	PGSB	exon	.	ID=SECCE7Rv1G0463600.1.exon.1;Parent=SECCE7Rv1G0463600.1	SECCE7Rv1G0463600.1	789	present	Chromosome	lo7-cs_q30_rye_filter	SECCE7Rv1G0463600.1	Coverage	100
chr7R	55114728	55114912	.	-	PGSB	exon	.	ID=SECCE7Rv1G0463610.1.exon.1;Parent=SECCE7Rv1G0463610.1	SECCE7Rv1G0463610.1	1683	present	Chromosome	lo7-cs_q30_rye_filter	SECCE7Rv1G0463610.1	Coverage	100
chr7R	55122125	55122334	.	+	PGSB	exon	.	ID=SECCE7Rv1G0463620.1.exon.1;Parent=SECCE7Rv1G0463620.1	SECCE7Rv1G0463620.1	1152	present	Chromosome	lo7-cs_q30_rye_filter	SECCE7Rv1G0463620.1	Coverage	100
chr7R	55492190	55492258	.	+	PGSB	exon	.	ID=SECCE7Rv1G0463630.1.exon.1;Parent=SECCE7Rv1G0463630.1	SECCE7Rv1G0463630.1	474	present	Chromosome	lo7-cs_q30_rye_filter	SECCE7Rv1G0463630.1	Coverage	100
chr7R	55649362	55650238	.	+	PGSB	exon	.	ID=SECCE7Rv1G0463640.1.exon.1;Parent=SECCE7Rv1G0463640.1	SECCE7Rv1G0463640.1	850	present	Chromosome	lo7-cs_q30_rye_filter	SECCE7Rv1G0463640.1	Coverage	97.032
chr7R	55671513	55672086	.	-	PGSB	exon	.	ID=SECCE7Rv1G0463650.1.exon.1;Parent=SECCE7Rv1G0463650.1	SECCE7Rv1G0463650.1	573	present	Chromosome	lo7-cs_q30_rye_filter	SECCE7Rv1G0463650.1	Coverage	100
chr7R	55872061	55872581	.	-	PGSB	exon	.	ID=SECCE7Rv1G0463660.1.exon.1;Parent=SECCE7Rv1G0463660.1	SECCE7Rv1G0463660.1	619	present	Chromosome	lo7-cs_q30_rye_filter	SECCE7Rv1G0463660.1	Coverage	59.6339
chr7R	55945306	55946794	.	+	PGSB	exon	.	ID=SECCE7Rv1G0463670.1.exon.1;Parent=SECCE7Rv1G0463670.1	SECCE7Rv1G0463670.1	1189	present	Chromosome	lo7-cs_q30_rye_filter	SECCE7Rv1G0463670.1	Coverage	79.9059
chr7R	55953427	55953967	.	+	PGSB	exon	.	ID=SECCE7Rv1G0463680.1.exon.1;Parent=SECCE7Rv1G0463680.1	SECCE7Rv1G0463680.1	540	present	Chromosome	lo7-cs_q30_rye_filter	SECCE7Rv1G0463680.1	Coverage	100
chr7R	55986715	55987291	.	+	PGSB	exon	.	ID=SECCE7Rv1G0463690.1.exon.1;Parent=SECCE7Rv1G0463690.1	SECCE7Rv1G0463690.1	576	present	Chromosome	lo7-cs_q30_rye_filter	SECCE7Rv1G0463690.1	Coverage	100
chr7R	56180521	56182608	.	+	PGSB	exon	.	ID=SECCE7Rv1G0463700.1.exon.1;Parent=SECCE7Rv1G0463700.1	SECCE7Rv1G0463700.1	2115	present	Chromosome	lo7-cs_q30_rye_filter	SECCE7Rv1G0463700.1	Coverage	100
chr7R	56194900	56194912	.	+	PGSB	exon	.	ID=SECCE7Rv1G0463710.1.exon.1;Parent=SECCE7Rv1G0463710.1	SECCE7Rv1G0463710.1	609	present	Chromosome	lo7-cs_q30_rye_filter	SECCE7Rv1G0463710.1	Coverage	100
chr7R	56735378	56736755	.	-	PGSB	exon	.	ID=SECCE7Rv1G0463720.1.exon.1;Parent=SECCE7Rv1G0463720.1	SECCE7Rv1G0463720.1	870	present	Chromosome	lo7-cs_q30_rye_filter	SECCE7Rv1G0463720.1	Coverage	58
chr7R	56741653	56741872	.	-	PGSB	exon	.	ID=SECCE7Rv1G0463730.1.exon.1;Parent=SECCE7Rv1G0463730.1	SECCE7Rv1G0463730.1	0	absent	Chromosome	lo7-cs_q30_rye_filter	SECCE7Rv1G0463730.1	Coverage	0
chr7R	56868665	56868739	.	+	PGSB	exon	.	ID=SECCE7Rv1G0463740.1.exon.1;Parent=SECCE7Rv1G0463740.1	SECCE7Rv1G0463740.1	1068	present	Chromosome	lo7-cs_q30_rye_filter	SECCE7Rv1G0463740.1	Coverage	100
chr7R	56883082	56884507	.	+	PGSB	exon	.	ID=SECCE7Rv1G0463750.1.exon.1;Parent=SECCE7Rv1G0463750.1	SECCE7Rv1G0463750.1	1015	present	Chromosome	lo7-cs_q30_rye_filter	SECCE7Rv1G0463750.1	Coverage	71.2281
chr7R	56909693	56909715	.	+	PGSB	exon	.	ID=SECCE7Rv1G0463760.1.exon.1;Parent=SECCE7Rv1G0463760.1	SECCE7Rv1G0463760.1	798	present	Chromosome	lo7-cs_q30_rye_filter	SECCE7Rv1G0463760.1	Coverage	100
chr7R	56912529	56913018	.	-	PGSB	exon	.	ID=SECCE7Rv1G0463770.1.exon.1;Parent=SECCE7Rv1G0463770.1	SECCE7Rv1G0463770.1	489	present	Chromosome	lo7-cs_q30_rye_filter	SECCE7Rv1G0463770.1	Coverage	100
chr7R	56992857	56993337	.	-	PGSB	exon	.	ID=SECCE7Rv1G0463780.1.exon.1;Parent=SECCE7Rv1G0463780.1	SECCE7Rv1G0463780.1	480	present	Chromosome	lo7-cs_q30_rye_filter	SECCE7Rv1G0463780.1	Coverage	100
chr7R	57286561	57286924	.	+	PGSB	exon	.	ID=SECCE7Rv1G0463790.1.exon.1;Parent=SECCE7Rv1G0463790.1	SECCE7Rv1G0463790.1	363	present	Chromosome	lo7-cs_q30_rye_filter	SECCE7Rv1G0463790.1	Coverage	100
chr7R	57317620	57317664	.	+	PGSB	exon	.	ID=SECCE7Rv1G0463800.1.exon.1;Parent=SECCE7Rv1G0463800.1	SECCE7Rv1G0463800.1	558	present	Chromosome	lo7-cs_q30_rye_filter	SECCE7Rv1G0463800.1	Coverage	100
chr7R	57323767	57324196	.	+	PGSB	exon	.	ID=SECCE7Rv1G0463810.1.exon.1;Parent=SECCE7Rv1G0463810.1	SECCE7Rv1G0463810.1	570	present	Chromosome	lo7-cs_q30_rye_filter	SECCE7Rv1G0463810.1	Coverage	100
chr7R	57342747	57343047	.	+	PGSB	exon	.	ID=SECCE7Rv1G0463820.1.exon.1;Parent=SECCE7Rv1G0463820.1	SECCE7Rv1G0463820.1	300	present	Chromosome	lo7-cs_q30_rye_filter	SECCE7Rv1G0463820.1	Coverage	100
chr7R	57344998	57345083	.	+	PGSB	exon	.	ID=SECCE7Rv1G0463830.1.exon.1;Parent=SECCE7Rv1G0463830.1	SECCE7Rv1G0463830.1	1188	present	Chromosome	lo7-cs_q30_rye_filter	SECCE7Rv1G0463830.1	Coverage	100
chr7R	57493354	57493601	.	+	PGSB	exon	.	ID=SECCE7Rv1G0463840.1.exon.1;Parent=SECCE7Rv1G0463840.1	SECCE7Rv1G0463840.1	1566	present	Chromosome	lo7-cs_q30_rye_filter	SECCE7Rv1G0463840.1	Coverage	100
chr7R	57525208	57526663	.	-	PGSB	exon	.	ID=SECCE7Rv1G0463850.1.exon.1;Parent=SECCE7Rv1G0463850.1	SECCE7Rv1G0463850.1	1455	present	Chromosome	lo7-cs_q30_rye_filter	SECCE7Rv1G0463850.1	Coverage	100
chr7R	57656987	57658004	.	+	PGSB	exon	.	ID=SECCE7Rv1G0463860.1.exon.1;Parent=SECCE7Rv1G0463860.1	SECCE7Rv1G0463860.1	985	present	Chromosome	lo7-cs_q30_rye_filter	SECCE7Rv1G0463860.1	Coverage	96.8535
chr7R	57659897	57660005	.	-	PGSB	exon	.	ID=SECCE7Rv1G0463870.1.exon.1;Parent=SECCE7Rv1G0463870.1	SECCE7Rv1G0463870.1	501	present	Chromosome	lo7-cs_q30_rye_filter	SECCE7Rv1G0463870.1	Coverage	100
chr7R	57663518	57665303	.	+	PGSB	exon	.	ID=SECCE7Rv1G0463880.1.exon.1;Parent=SECCE7Rv1G0463880.1	SECCE7Rv1G0463880.1	2083	present	Chromosome	lo7-cs_q30_rye_filter	SECCE7Rv1G0463880.1	Coverage	87.4475
chr7R	57701267	57701336	.	-	PGSB	exon	.	ID=SECCE7Rv1G0463890.1.exon.1;Parent=SECCE7Rv1G0463890.1	SECCE7Rv1G0463890.1	618	present	Chromosome	lo7-cs_q30_rye_filter	SECCE7Rv1G0463890.1	Coverage	100
chr7R	57756068	57756497	.	+	PGSB	exon	.	ID=SECCE7Rv1G0463900.1.exon.1;Parent=SECCE7Rv1G0463900.1	SECCE7Rv1G0463900.1	0	absent	Chromosome	lo7-cs_q30_rye_filter	SECCE7Rv1G0463900.1	Coverage	0
chr7R	57759193	57759619	.	+	PGSB	exon	.	ID=SECCE7Rv1G0463910.1.exon.1;Parent=SECCE7Rv1G0463910.1	SECCE7Rv1G0463910.1	426	present	Chromosome	lo7-cs_q30_rye_filter	SECCE7Rv1G0463910.1	Coverage	100
chr7R	57780421	57780850	.	+	PGSB	exon	.	ID=SECCE7Rv1G0463920.1.exon.1;Parent=SECCE7Rv1G0463920.1	SECCE7Rv1G0463920.1	0	absent	Chromosome	lo7-cs_q30_rye_filter	SECCE7Rv1G0463920.1	Coverage	0
chr7R	57782665	57783064	.	+	PGSB	exon	.	ID=SECCE7Rv1G0463930.1.exon.1;Parent=SECCE7Rv1G0463930.1	SECCE7Rv1G0463930.1	0	absent	Chromosome	lo7-cs_q30_rye_filter	SECCE7Rv1G0463930.1	Coverage	0
chr7R	57784819	57784870	.	+	PGSB	exon	.	ID=SECCE7Rv1G0463940.1.exon.1;Parent=SECCE7Rv1G0463940.1	SECCE7Rv1G0463940.1	0	absent	Chromosome	lo7-cs_q30_rye_filter	SECCE7Rv1G0463940.1	Coverage	0
chr7R	58081723	58082023	.	+	PGSB	exon	.	ID=SECCE7Rv1G0463950.1.exon.1;Parent=SECCE7Rv1G0463950.1	SECCE7Rv1G0463950.1	0	absent	Chromosome	lo7-cs_q30_rye_filter	SECCE7Rv1G0463950.1	Coverage	0
chr7R	58082155	58082346	.	+	PGSB	exon	.	ID=SECCE7Rv1G0463960.1.exon.1;Parent=SECCE7Rv1G0463960.1	SECCE7Rv1G0463960.1	0	absent	Chromosome	lo7-cs_q30_rye_filter	SECCE7Rv1G0463960.1	Coverage	0
chr7R	58087530	58087945	.	+	PGSB	exon	.	ID=SECCE7Rv1G0463970.1.exon.1;Parent=SECCE7Rv1G0463970.1	SECCE7Rv1G0463970.1	0	absent	Chromosome	lo7-cs_q30_rye_filter	SECCE7Rv1G0463970.1	Coverage	0
chr7R	58170913	58171682	.	-	PGSB	exon	.	ID=SECCE7Rv1G0463980.1.exon.1;Parent=SECCE7Rv1G0463980.1	SECCE7Rv1G0463980.1	1226	present	Chromosome	lo7-cs_q30_rye_filter	SECCE7Rv1G0463980.1	Coverage	44.4203
chr7R	58178048	58178210	.	+	PGSB	exon	.	ID=SECCE7Rv1G0463990.1.exon.1;Parent=SECCE7Rv1G0463990.1	SECCE7Rv1G0463990.1	0	absent	Chromosome	lo7-cs_q30_rye_filter	SECCE7Rv1G0463990.1	Coverage	0
chr7R	58186023	58186113	.	-	PGSB	exon	.	ID=SECCE7Rv1G0464000.1.exon.1;Parent=SECCE7Rv1G0464000.1	SECCE7Rv1G0464000.1	750	present	Chromosome	lo7-cs_q30_rye_filter	SECCE7Rv1G0464000.1	Coverage	33.8295
chr7R	58420912	58421305	.	+	PGSB	exon	.	ID=SECCE7Rv1G0464010.1.exon.1;Parent=SECCE7Rv1G0464010.1	SECCE7Rv1G0464010.1	390	present	Chromosome	lo7-cs_q30_rye_filter	SECCE7Rv1G0464010.1	Coverage	99.2366
chr7R	58631471	58631769	.	+	PGSB	exon	.	ID=SECCE7Rv1G0464020.1.exon.1;Parent=SECCE7Rv1G0464020.1	SECCE7Rv1G0464020.1	1323	present	Chromosome	lo7-cs_q30_rye_filter	SECCE7Rv1G0464020.1	Coverage	92.4528
chr7R	58645189	58645666	.	-	PGSB	exon	.	ID=SECCE7Rv1G0464030.1.exon.1;Parent=SECCE7Rv1G0464030.1	SECCE7Rv1G0464030.1	266	present	Chromosome	lo7-cs_q30_rye_filter	SECCE7Rv1G0464030.1	Coverage	55.7652
chr7R	58645728	58646454	.	-	PGSB	exon	.	ID=SECCE7Rv1G0464040.1.exon.1;Parent=SECCE7Rv1G0464040.1	SECCE7Rv1G0464040.1	371	present	Chromosome	lo7-cs_q30_rye_filter	SECCE7Rv1G0464040.1	Coverage	51.1019
chr7R	58647955	58648228	.	+	PGSB	exon	.	ID=SECCE7Rv1G0464050.1.exon.1;Parent=SECCE7Rv1G0464050.1	SECCE7Rv1G0464050.1	0	absent	Chromosome	lo7-cs_q30_rye_filter	SECCE7Rv1G0464050.1	Coverage	0
chr7R	58652911	58653118	.	-	PGSB	exon	.	ID=SECCE7Rv1G0464060.1.exon.1;Parent=SECCE7Rv1G0464060.1	SECCE7Rv1G0464060.1	0	absent	Chromosome	lo7-cs_q30_rye_filter	SECCE7Rv1G0464060.1	Coverage	0
chr7R	58656419	58658333	.	-	PGSB	exon	.	ID=SECCE7Rv1G0464070.1.exon.1;Parent=SECCE7Rv1G0464070.1	SECCE7Rv1G0464070.1	447	present	Chromosome	lo7-cs_q30_rye_filter	SECCE7Rv1G0464070.1	Coverage	23.3542
chr7R	58720362	58720623	.	-	PGSB	exon	.	ID=SECCE7Rv1G0464080.1.exon.1;Parent=SECCE7Rv1G0464080.1	SECCE7Rv1G0464080.1	168	present	Chromosome	lo7-cs_q30_rye_filter	SECCE7Rv1G0464080.1	Coverage	64.3678
chr7R	58736204	58736588	.	-	PGSB	exon	.	ID=SECCE7Rv1G0464090.1.exon.1;Parent=SECCE7Rv1G0464090.1	SECCE7Rv1G0464090.1	384	present	Chromosome	lo7-cs_q30_rye_filter	SECCE7Rv1G0464090.1	Coverage	100
chr7R	58861125	58862041	.	-	PGSB	exon	.	ID=SECCE7Rv1G0464100.1.exon.1;Parent=SECCE7Rv1G0464100.1	SECCE7Rv1G0464100.1	918	present	Chromosome	lo7-cs_q30_rye_filter	SECCE7Rv1G0464100.1	Coverage	63.0928
chr7R	58873156	58874725	.	-	PGSB	exon	.	ID=SECCE7Rv1G0464110.1.exon.1;Parent=SECCE7Rv1G0464110.1	SECCE7Rv1G0464110.1	744	present	Chromosome	lo7-cs_q30_rye_filter	SECCE7Rv1G0464110.1	Coverage	47.4187
chr7R	59161616	59162117	.	+	PGSB	exon	.	ID=SECCE7Rv1G0464120.1.exon.1;Parent=SECCE7Rv1G0464120.1	SECCE7Rv1G0464120.1	401	present	Chromosome	lo7-cs_q30_rye_filter	SECCE7Rv1G0464120.1	Coverage	80.0399
chr7R	59162865	59163774	.	-	PGSB	exon	.	ID=SECCE7Rv1G0464130.1.exon.1;Parent=SECCE7Rv1G0464130.1	SECCE7Rv1G0464130.1	764	present	Chromosome	lo7-cs_q30_rye_filter	SECCE7Rv1G0464130.1	Coverage	84.0484
chr7R	59204213	59204879	.	-	PGSB	exon	.	ID=SECCE7Rv1G0464140.1.exon.1;Parent=SECCE7Rv1G0464140.1	SECCE7Rv1G0464140.1	0	absent	Chromosome	lo7-cs_q30_rye_filter	SECCE7Rv1G0464140.1	Coverage	0
chr7R	59208001	59208133	.	-	PGSB	exon	.	ID=SECCE7Rv1G0464150.1.exon.1;Parent=SECCE7Rv1G0464150.1	SECCE7Rv1G0464150.1	132	present	Chromosome	lo7-cs_q30_rye_filter	SECCE7Rv1G0464150.1	Coverage	50
chr7R	59261618	59262201	.	+	PGSB	exon	.	ID=SECCE7Rv1G0464160.1.exon.1;Parent=SECCE7Rv1G0464160.1	SECCE7Rv1G0464160.1	1513	present	Chromosome	lo7-cs_q30_rye_filter	SECCE7Rv1G0464160.1	Coverage	99.474
chr7R	59269442	59269640	.	+	PGSB	exon	.	ID=SECCE7Rv1G0464170.1.exon.1;Parent=SECCE7Rv1G0464170.1	SECCE7Rv1G0464170.1	196	present	Chromosome	lo7-cs_q30_rye_filter	SECCE7Rv1G0464170.1	Coverage	98.9899
chr7R	59353965	59354250	.	-	PGSB	exon	.	ID=SECCE7Rv1G0464180.1.exon.1;Parent=SECCE7Rv1G0464180.1	SECCE7Rv1G0464180.1	789	present	Chromosome	lo7-cs_q30_rye_filter	SECCE7Rv1G0464180.1	Coverage	97.4074
chr7R	59399484	59400192	.	+	PGSB	exon	.	ID=SECCE7Rv1G0464190.1.exon.1;Parent=SECCE7Rv1G0464190.1	SECCE7Rv1G0464190.1	389	present	Chromosome	lo7-cs_q30_rye_filter	SECCE7Rv1G0464190.1	Coverage	54.9435
chr7R	59407824	59407917	.	-	PGSB	exon	.	ID=SECCE7Rv1G0464200.1.exon.1;Parent=SECCE7Rv1G0464200.1	SECCE7Rv1G0464200.1	741	present	Chromosome	lo7-cs_q30_rye_filter	SECCE7Rv1G0464200.1	Coverage	100
chr7R	59641611	59641617	.	+	PGSB	exon	.	ID=SECCE7Rv1G0464210.1.exon.1;Parent=SECCE7Rv1G0464210.1	SECCE7Rv1G0464210.1	612	present	Chromosome	lo7-cs_q30_rye_filter	SECCE7Rv1G0464210.1	Coverage	100
chr7R	59642958	59642970	.	-	PGSB	exon	.	ID=SECCE7Rv1G0464220.1.exon.1;Parent=SECCE7Rv1G0464220.1	SECCE7Rv1G0464220.1	611	present	Chromosome	lo7-cs_q30_rye_filter	SECCE7Rv1G0464220.1	Coverage	43.1497
chr7R	59660406	59660940	.	-	PGSB	exon	.	ID=SECCE7Rv1G0464230.1.exon.1;Parent=SECCE7Rv1G0464230.1	SECCE7Rv1G0464230.1	534	present	Chromosome	lo7-cs_q30_rye_filter	SECCE7Rv1G0464230.1	Coverage	100
chr7R	59664731	59664970	.	+	PGSB	exon	.	ID=SECCE7Rv1G0464240.1.exon.1;Parent=SECCE7Rv1G0464240.1	SECCE7Rv1G0464240.1	621	present	Chromosome	lo7-cs_q30_rye_filter	SECCE7Rv1G0464240.1	Coverage	100
chr7R	59812860	59813412	.	+	PGSB	exon	.	ID=SECCE7Rv1G0464250.1.exon.1;Parent=SECCE7Rv1G0464250.1	SECCE7Rv1G0464250.1	513	present	Chromosome	lo7-cs_q30_rye_filter	SECCE7Rv1G0464250.1	Coverage	92.9348
chr7R	59854263	59854629	.	-	PGSB	exon	.	ID=SECCE7Rv1G0464260.1.exon.1;Parent=SECCE7Rv1G0464260.1	SECCE7Rv1G0464260.1	361	present	Chromosome	lo7-cs_q30_rye_filter	SECCE7Rv1G0464260.1	Coverage	98.6339
chr7R	59858249	59858294	.	-	PGSB	exon	.	ID=SECCE7Rv1G0464270.1.exon.1;Parent=SECCE7Rv1G0464270.1	SECCE7Rv1G0464270.1	501	present	Chromosome	lo7-cs_q30_rye_filter	SECCE7Rv1G0464270.1	Coverage	100
chr7R	59860350	59861838	.	+	PGSB	exon	.	ID=SECCE7Rv1G0464280.1.exon.1;Parent=SECCE7Rv1G0464280.1	SECCE7Rv1G0464280.1	1109	present	Chromosome	lo7-cs_q30_rye_filter	SECCE7Rv1G0464280.1	Coverage	74.5296
chr7R	59873836	59874241	.	+	PGSB	exon	.	ID=SECCE7Rv1G0464290.1.exon.1;Parent=SECCE7Rv1G0464290.1	SECCE7Rv1G0464290.1	973	present	Chromosome	lo7-cs_q30_rye_filter	SECCE7Rv1G0464290.1	Coverage	59.9507
chr7R	60037043	60037484	.	-	PGSB	exon	.	ID=SECCE7Rv1G0464300.1.exon.1;Parent=SECCE7Rv1G0464300.1	SECCE7Rv1G0464300.1	312	present	Chromosome	lo7-cs_q30_rye_filter	SECCE7Rv1G0464300.1	Coverage	20.3922
chr7R	60040322	60040331	.	-	PGSB	exon	.	ID=SECCE7Rv1G0464310.1.exon.1;Parent=SECCE7Rv1G0464310.1	SECCE7Rv1G0464310.1	714	present	Chromosome	lo7-cs_q30_rye_filter	SECCE7Rv1G0464310.1	Coverage	90.8397
chr7R	60046594	60046804	.	+	PGSB	exon	.	ID=SECCE7Rv1G0464320.1.exon.1;Parent=SECCE7Rv1G0464320.1	SECCE7Rv1G0464320.1	0	absent	Chromosome	lo7-cs_q30_rye_filter	SECCE7Rv1G0464320.1	Coverage	0
chr7R	60048147	60048271	.	+	PGSB	exon	.	ID=SECCE7Rv1G0464330.1.exon.1;Parent=SECCE7Rv1G0464330.1	SECCE7Rv1G0464330.1	207	present	Chromosome	lo7-cs_q30_rye_filter	SECCE7Rv1G0464330.1	Coverage	21.0366
chr7R	60093641	60095678	.	+	PGSB	exon	.	ID=SECCE7Rv1G0464340.1.exon.1;Parent=SECCE7Rv1G0464340.1	SECCE7Rv1G0464340.1	695	present	Chromosome	lo7-cs_q30_rye_filter	SECCE7Rv1G0464340.1	Coverage	34.1188
chr7R	60142008	60142088	.	+	PGSB	exon	.	ID=SECCE7Rv1G0464350.1.exon.1;Parent=SECCE7Rv1G0464350.1	SECCE7Rv1G0464350.1	1228	present	Chromosome	lo7-cs_q30_rye_filter	SECCE7Rv1G0464350.1	Coverage	56.0731
chr7R	60147439	60148487	.	+	PGSB	exon	.	ID=SECCE7Rv1G0464360.1.exon.1;Parent=SECCE7Rv1G0464360.1	SECCE7Rv1G0464360.1	1971	present	Chromosome	lo7-cs_q30_rye_filter	SECCE7Rv1G0464360.1	Coverage	43.8
chr7R	60289241	60289898	.	+	PGSB	exon	.	ID=SECCE7Rv1G0464370.1.exon.1;Parent=SECCE7Rv1G0464370.1	SECCE7Rv1G0464370.1	1357	present	Chromosome	lo7-cs_q30_rye_filter	SECCE7Rv1G0464370.1	Coverage	76.5369
chr7R	60326076	60326559	.	+	PGSB	exon	.	ID=SECCE7Rv1G0464380.1.exon.1;Parent=SECCE7Rv1G0464380.1	SECCE7Rv1G0464380.1	1577	present	Chromosome	lo7-cs_q30_rye_filter	SECCE7Rv1G0464380.1	Coverage	98.8095
chr7R	60595583	60596066	.	+	PGSB	exon	.	ID=SECCE7Rv1G0464390.1.exon.1;Parent=SECCE7Rv1G0464390.1	SECCE7Rv1G0464390.1	1491	present	Chromosome	lo7-cs_q30_rye_filter	SECCE7Rv1G0464390.1	Coverage	93.4211
chr7R	60637210	60637483	.	+	PGSB	exon	.	ID=SECCE7Rv1G0464400.1.exon.1;Parent=SECCE7Rv1G0464400.1	SECCE7Rv1G0464400.1	0	absent	Chromosome	lo7-cs_q30_rye_filter	SECCE7Rv1G0464400.1	Coverage	0
chr7R	60680706	60681046	.	-	PGSB	exon	.	ID=SECCE7Rv1G0464410.1.exon.1;Parent=SECCE7Rv1G0464410.1	SECCE7Rv1G0464410.1	1432	present	Chromosome	lo7-cs_q30_rye_filter	SECCE7Rv1G0464410.1	Coverage	90.0629
chr7R	60937108	60937585	.	+	PGSB	exon	.	ID=SECCE7Rv1G0464420.1.exon.1;Parent=SECCE7Rv1G0464420.1	SECCE7Rv1G0464420.1	1590	present	Chromosome	lo7-cs_q30_rye_filter	SECCE7Rv1G0464420.1	Coverage	100
chr7R	61141382	61141442	.	+	PGSB	exon	.	ID=SECCE7Rv1G0464430.1.exon.1;Parent=SECCE7Rv1G0464430.1	SECCE7Rv1G0464430.1	2325	present	Chromosome	lo7-cs_q30_rye_filter	SECCE7Rv1G0464430.1	Coverage	99.6144
chr7R	61525442	61526222	.	-	PGSB	exon	.	ID=SECCE7Rv1G0464440.1.exon.1;Parent=SECCE7Rv1G0464440.1	SECCE7Rv1G0464440.1	761	present	Chromosome	lo7-cs_q30_rye_filter	SECCE7Rv1G0464440.1	Coverage	97.5641
chr7R	61604962	61605096	.	-	PGSB	exon	.	ID=SECCE7Rv1G0464450.1.exon.1;Parent=SECCE7Rv1G0464450.1	SECCE7Rv1G0464450.1	1026	present	Chromosome	lo7-cs_q30_rye_filter	SECCE7Rv1G0464450.1	Coverage	90
chr7R	61607640	61607841	.	-	PGSB	exon	.	ID=SECCE7Rv1G0464460.1.exon.1;Parent=SECCE7Rv1G0464460.1	SECCE7Rv1G0464460.1	309	present	Chromosome	lo7-cs_q30_rye_filter	SECCE7Rv1G0464460.1	Coverage	45.3744
chr7R	61705078	61705924	.	-	PGSB	exon	.	ID=SECCE7Rv1G0464470.1.exon.1;Parent=SECCE7Rv1G0464470.1	SECCE7Rv1G0464470.1	175	present	Chromosome	lo7-cs_q30_rye_filter	SECCE7Rv1G0464470.1	Coverage	20.6856
chr7R	61836672	61837403	.	-	PGSB	exon	.	ID=SECCE7Rv1G0464480.1.exon.1;Parent=SECCE7Rv1G0464480.1	SECCE7Rv1G0464480.1	724	present	Chromosome	lo7-cs_q30_rye_filter	SECCE7Rv1G0464480.1	Coverage	73.8022
chr7R	61846271	61846580	.	-	PGSB	exon	.	ID=SECCE7Rv1G0464490.1.exon.1;Parent=SECCE7Rv1G0464490.1	SECCE7Rv1G0464490.1	0	absent	Chromosome	lo7-cs_q30_rye_filter	SECCE7Rv1G0464490.1	Coverage	0
chr7R	61899834	61900767	.	-	PGSB	exon	.	ID=SECCE7Rv1G0464500.1.exon.1;Parent=SECCE7Rv1G0464500.1	SECCE7Rv1G0464500.1	429	present	Chromosome	lo7-cs_q30_rye_filter	SECCE7Rv1G0464500.1	Coverage	45.9807
chr7R	61901821	61902046	.	+	PGSB	exon	.	ID=SECCE7Rv1G0464510.1.exon.1;Parent=SECCE7Rv1G0464510.1	SECCE7Rv1G0464510.1	0	absent	Chromosome	lo7-cs_q30_rye_filter	SECCE7Rv1G0464510.1	Coverage	0
chr7R	61964479	61965517	.	-	PGSB	exon	.	ID=SECCE7Rv1G0464520.1.exon.1;Parent=SECCE7Rv1G0464520.1	SECCE7Rv1G0464520.1	1034	present	Chromosome	lo7-cs_q30_rye_filter	SECCE7Rv1G0464520.1	Coverage	99.6146
chr7R	61986747	61986931	.	-	PGSB	exon	.	ID=SECCE7Rv1G0464530.1.exon.1;Parent=SECCE7Rv1G0464530.1	SECCE7Rv1G0464530.1	489	present	Chromosome	lo7-cs_q30_rye_filter	SECCE7Rv1G0464530.1	Coverage	100
chr7R	62200588	62200712	.	+	PGSB	exon	.	ID=SECCE7Rv1G0464540.1.exon.1;Parent=SECCE7Rv1G0464540.1	SECCE7Rv1G0464540.1	219	present	Chromosome	lo7-cs_q30_rye_filter	SECCE7Rv1G0464540.1	Coverage	10.1248
chr7R	62206420	62206490	.	-	PGSB	exon	.	ID=SECCE7Rv1G0464550.1.exon.1;Parent=SECCE7Rv1G0464550.1	SECCE7Rv1G0464550.1	2375	present	Chromosome	lo7-cs_q30_rye_filter	SECCE7Rv1G0464550.1	Coverage	84.1304
chr7R	62301702	62302512	.	+	PGSB	exon	.	ID=SECCE7Rv1G0464560.1.exon.1;Parent=SECCE7Rv1G0464560.1	SECCE7Rv1G0464560.1	0	absent	Chromosome	lo7-cs_q30_rye_filter	SECCE7Rv1G0464560.1	Coverage	0
chr7R	62575755	62575959	.	+	PGSB	exon	.	ID=SECCE7Rv1G0464570.1.exon.1;Parent=SECCE7Rv1G0464570.1	SECCE7Rv1G0464570.1	930	present	Chromosome	lo7-cs_q30_rye_filter	SECCE7Rv1G0464570.1	Coverage	53.3563
chr7R	62629568	62629631	.	+	PGSB	exon	.	ID=SECCE7Rv1G0464580.1.exon.1;Parent=SECCE7Rv1G0464580.1	SECCE7Rv1G0464580.1	589	present	Chromosome	lo7-cs_q30_rye_filter	SECCE7Rv1G0464580.1	Coverage	95.3074
chr7R	62633728	62636698	.	+	PGSB	exon	.	ID=SECCE7Rv1G0464590.1.exon.1;Parent=SECCE7Rv1G0464590.1	SECCE7Rv1G0464590.1	716	present	Chromosome	lo7-cs_q30_rye_filter	SECCE7Rv1G0464590.1	Coverage	24.1077
chr7R	62639147	62639897	.	+	PGSB	exon	.	ID=SECCE7Rv1G0464600.1.exon.1;Parent=SECCE7Rv1G0464600.1	SECCE7Rv1G0464600.1	373	present	Chromosome	lo7-cs_q30_rye_filter	SECCE7Rv1G0464600.1	Coverage	14.4071
chr7R	62647092	62647305	.	+	PGSB	exon	.	ID=SECCE7Rv1G0464610.1.exon.1;Parent=SECCE7Rv1G0464610.1	SECCE7Rv1G0464610.1	498	present	Chromosome	lo7-cs_q30_rye_filter	SECCE7Rv1G0464610.1	Coverage	70.0422
chr7R	62724895	62725012	.	+	PGSB	exon	.	ID=SECCE7Rv1G0464620.1.exon.1;Parent=SECCE7Rv1G0464620.1	SECCE7Rv1G0464620.1	1518	present	Chromosome	lo7-cs_q30_rye_filter	SECCE7Rv1G0464620.1	Coverage	93.5305
chr7R	63099344	63099470	.	+	PGSB	exon	.	ID=SECCE7Rv1G0464630.1.exon.1;Parent=SECCE7Rv1G0464630.1	SECCE7Rv1G0464630.1	1752	present	Chromosome	lo7-cs_q30_rye_filter	SECCE7Rv1G0464630.1	Coverage	100
chr7R	63211856	63212794	.	-	PGSB	exon	.	ID=SECCE7Rv1G0464640.1.exon.1;Parent=SECCE7Rv1G0464640.1	SECCE7Rv1G0464640.1	1758	present	Chromosome	lo7-cs_q30_rye_filter	SECCE7Rv1G0464640.1	Coverage	98.4874
chr7R	63433703	63433812	.	+	PGSB	exon	.	ID=SECCE7Rv1G0464650.1.exon.1;Parent=SECCE7Rv1G0464650.1	SECCE7Rv1G0464650.1	1535	present	Chromosome	lo7-cs_q30_rye_filter	SECCE7Rv1G0464650.1	Coverage	98.3974
chr7R	63436771	63436825	.	-	PGSB	exon	.	ID=SECCE7Rv1G0464660.1.exon.1;Parent=SECCE7Rv1G0464660.1	SECCE7Rv1G0464660.1	344	present	Chromosome	lo7-cs_q30_rye_filter	SECCE7Rv1G0464660.1	Coverage	46.9945
chr7R	63439486	63439744	.	+	PGSB	exon	.	ID=SECCE7Rv1G0464670.1.exon.1;Parent=SECCE7Rv1G0464670.1	SECCE7Rv1G0464670.1	330	present	Chromosome	lo7-cs_q30_rye_filter	SECCE7Rv1G0464670.1	Coverage	33.033
chr7R	63442238	63442435	.	-	PGSB	exon	.	ID=SECCE7Rv1G0464680.1.exon.1;Parent=SECCE7Rv1G0464680.1	SECCE7Rv1G0464680.1	561	present	Chromosome	lo7-cs_q30_rye_filter	SECCE7Rv1G0464680.1	Coverage	49.0814
chr7R	63446570	63446969	.	+	PGSB	exon	.	ID=SECCE7Rv1G0464690.1.exon.1;Parent=SECCE7Rv1G0464690.1	SECCE7Rv1G0464690.1	0	absent	Chromosome	lo7-cs_q30_rye_filter	SECCE7Rv1G0464690.1	Coverage	0
chr7R	63498204	63498629	.	+	PGSB	exon	.	ID=SECCE7Rv1G0464700.1.exon.1;Parent=SECCE7Rv1G0464700.1	SECCE7Rv1G0464700.1	638	present	Chromosome	lo7-cs_q30_rye_filter	SECCE7Rv1G0464700.1	Coverage	80.8619
chr7R	63767194	63767872	.	+	PGSB	exon	.	ID=SECCE7Rv1G0464710.1.exon.1;Parent=SECCE7Rv1G0464710.1	SECCE7Rv1G0464710.1	3408	present	Chromosome	lo7-cs_q30_rye_filter	SECCE7Rv1G0464710.1	Coverage	94.8247
chr7R	63776603	63776981	.	+	PGSB	exon	.	ID=SECCE7Rv1G0464720.1.exon.1;Parent=SECCE7Rv1G0464720.1	SECCE7Rv1G0464720.1	378	present	Chromosome	lo7-cs_q30_rye_filter	SECCE7Rv1G0464720.1	Coverage	100
chr7R	63841134	63841520	.	+	PGSB	exon	.	ID=SECCE7Rv1G0464730.1.exon.1;Parent=SECCE7Rv1G0464730.1	SECCE7Rv1G0464730.1	566	present	Chromosome	lo7-cs_q30_rye_filter	SECCE7Rv1G0464730.1	Coverage	56.487
chr7R	63852197	63852425	.	+	PGSB	exon	.	ID=SECCE7Rv1G0464740.1.exon.1;Parent=SECCE7Rv1G0464740.1	SECCE7Rv1G0464740.1	0	absent	Chromosome	lo7-cs_q30_rye_filter	SECCE7Rv1G0464740.1	Coverage	0
chr7R	63859816	63860746	.	-	PGSB	exon	.	ID=SECCE7Rv1G0464750.1.exon.1;Parent=SECCE7Rv1G0464750.1	SECCE7Rv1G0464750.1	616	present	Chromosome	lo7-cs_q30_rye_filter	SECCE7Rv1G0464750.1	Coverage	48.6572
chr7R	63886612	63887257	.	-	PGSB	exon	.	ID=SECCE7Rv1G0464760.1.exon.1;Parent=SECCE7Rv1G0464760.1	SECCE7Rv1G0464760.1	645	present	Chromosome	lo7-cs_q30_rye_filter	SECCE7Rv1G0464760.1	Coverage	100
chr7R	64032641	64033571	.	-	PGSB	exon	.	ID=SECCE7Rv1G0464770.1.exon.1;Parent=SECCE7Rv1G0464770.1	SECCE7Rv1G0464770.1	773	present	Chromosome	lo7-cs_q30_rye_filter	SECCE7Rv1G0464770.1	Coverage	59.3702
chr7R	64117893	64118295	.	+	PGSB	exon	.	ID=SECCE7Rv1G0464780.1.exon.1;Parent=SECCE7Rv1G0464780.1	SECCE7Rv1G0464780.1	0	absent	Chromosome	lo7-cs_q30_rye_filter	SECCE7Rv1G0464780.1	Coverage	0
chr7R	64124170	64124590	.	+	PGSB	exon	.	ID=SECCE7Rv1G0464790.1.exon.1;Parent=SECCE7Rv1G0464790.1	SECCE7Rv1G0464790.1	199	present	Chromosome	lo7-cs_q30_rye_filter	SECCE7Rv1G0464790.1	Coverage	47.381
chr7R	64215644	64216601	.	-	PGSB	exon	.	ID=SECCE7Rv1G0464800.1.exon.1;Parent=SECCE7Rv1G0464800.1	SECCE7Rv1G0464800.1	897	present	Chromosome	lo7-cs_q30_rye_filter	SECCE7Rv1G0464800.1	Coverage	66.5924
chr7R	64312586	64312793	.	+	PGSB	exon	.	ID=SECCE7Rv1G0464810.1.exon.1;Parent=SECCE7Rv1G0464810.1	SECCE7Rv1G0464810.1	909	present	Chromosome	lo7-cs_q30_rye_filter	SECCE7Rv1G0464810.1	Coverage	100
chr7R	64339571	64339856	.	-	PGSB	exon	.	ID=SECCE7Rv1G0464820.1.exon.1;Parent=SECCE7Rv1G0464820.1	SECCE7Rv1G0464820.1	0	absent	Chromosome	lo7-cs_q30_rye_filter	SECCE7Rv1G0464820.1	Coverage	0
chr7R	64340370	64341081	.	-	PGSB	exon	.	ID=SECCE7Rv1G0464830.1.exon.1;Parent=SECCE7Rv1G0464830.1	SECCE7Rv1G0464830.1	0	absent	Chromosome	lo7-cs_q30_rye_filter	SECCE7Rv1G0464830.1	Coverage	0
chr7R	64582052	64582192	.	+	PGSB	exon	.	ID=SECCE7Rv1G0464840.1.exon.1;Parent=SECCE7Rv1G0464840.1	SECCE7Rv1G0464840.1	1602	present	Chromosome	lo7-cs_q30_rye_filter	SECCE7Rv1G0464840.1	Coverage	41.8168
chr7R	64587882	64587907	.	-	PGSB	exon	.	ID=SECCE7Rv1G0464850.1.exon.1;Parent=SECCE7Rv1G0464850.1	SECCE7Rv1G0464850.1	681	present	Chromosome	lo7-cs_q30_rye_filter	SECCE7Rv1G0464850.1	Coverage	100
chr7R	64795050	64795076	.	+	PGSB	exon	.	ID=SECCE7Rv1G0464860.1.exon.1;Parent=SECCE7Rv1G0464860.1	SECCE7Rv1G0464860.1	649	present	Chromosome	lo7-cs_q30_rye_filter	SECCE7Rv1G0464860.1	Coverage	91.2799
chr7R	64800216	64800574	.	-	PGSB	exon	.	ID=SECCE7Rv1G0464870.1.exon.1;Parent=SECCE7Rv1G0464870.1	SECCE7Rv1G0464870.1	875	present	Chromosome	lo7-cs_q30_rye_filter	SECCE7Rv1G0464870.1	Coverage	64.528
chr7R	64805830	64806203	.	-	PGSB	exon	.	ID=SECCE7Rv1G0464880.1.exon.1;Parent=SECCE7Rv1G0464880.1	SECCE7Rv1G0464880.1	510	present	Chromosome	lo7-cs_q30_rye_filter	SECCE7Rv1G0464880.1	Coverage	37.2807
chr7R	64843676	64844049	.	-	PGSB	exon	.	ID=SECCE7Rv1G0464890.1.exon.1;Parent=SECCE7Rv1G0464890.1	SECCE7Rv1G0464890.1	370	present	Chromosome	lo7-cs_q30_rye_filter	SECCE7Rv1G0464890.1	Coverage	27.0468
chr7R	64939482	64941291	.	+	PGSB	exon	.	ID=SECCE7Rv1G0464900.1.exon.1;Parent=SECCE7Rv1G0464900.1	SECCE7Rv1G0464900.1	0	absent	Chromosome	lo7-cs_q30_rye_filter	SECCE7Rv1G0464900.1	Coverage	0
chr7R	65045978	65047271	.	+	PGSB	exon	.	ID=SECCE7Rv1G0464910.1.exon.1;Parent=SECCE7Rv1G0464910.1	SECCE7Rv1G0464910.1	670	present	Chromosome	lo7-cs_q30_rye_filter	SECCE7Rv1G0464910.1	Coverage	51.8175
chr7R	65123913	65124111	.	+	PGSB	exon	.	ID=SECCE7Rv1G0464920.1.exon.1;Parent=SECCE7Rv1G0464920.1	SECCE7Rv1G0464920.1	0	absent	Chromosome	lo7-cs_q30_rye_filter	SECCE7Rv1G0464920.1	Coverage	0
chr7R	65146495	65146834	.	+	PGSB	exon	.	ID=SECCE7Rv1G0464930.1.exon.1;Parent=SECCE7Rv1G0464930.1	SECCE7Rv1G0464930.1	684	present	Chromosome	lo7-cs_q30_rye_filter	SECCE7Rv1G0464930.1	Coverage	100
chr7R	65163261	65163606	.	+	PGSB	exon	.	ID=SECCE7Rv1G0464940.1.exon.1;Parent=SECCE7Rv1G0464940.1	SECCE7Rv1G0464940.1	3177	present	Chromosome	lo7-cs_q30_rye_filter	SECCE7Rv1G0464940.1	Coverage	87.8109
chr7R	65253124	65253217	.	+	PGSB	exon	.	ID=SECCE7Rv1G0464950.1.exon.1;Parent=SECCE7Rv1G0464950.1	SECCE7Rv1G0464950.1	1583	present	Chromosome	lo7-cs_q30_rye_filter	SECCE7Rv1G0464950.1	Coverage	70.0753
chr7R	65373188	65373316	.	+	PGSB	exon	.	ID=SECCE7Rv1G0464960.1.exon.1;Parent=SECCE7Rv1G0464960.1	SECCE7Rv1G0464960.1	546	present	Chromosome	lo7-cs_q30_rye_filter	SECCE7Rv1G0464960.1	Coverage	100
chr7R	65452272	65452557	.	-	PGSB	exon	.	ID=SECCE7Rv1G0464970.1.exon.1;Parent=SECCE7Rv1G0464970.1	SECCE7Rv1G0464970.1	0	absent	Chromosome	lo7-cs_q30_rye_filter	SECCE7Rv1G0464970.1	Coverage	0
chr7R	65545687	65546452	.	-	PGSB	exon	.	ID=SECCE7Rv1G0464980.1.exon.1;Parent=SECCE7Rv1G0464980.1	SECCE7Rv1G0464980.1	1782	present	Chromosome	lo7-cs_q30_rye_filter	SECCE7Rv1G0464980.1	Coverage	96.9005
chr7R	65575823	65575826	.	-	PGSB	exon	.	ID=SECCE7Rv1G0464990.1.exon.1;Parent=SECCE7Rv1G0464990.1	SECCE7Rv1G0464990.1	354	present	Chromosome	lo7-cs_q30_rye_filter	SECCE7Rv1G0464990.1	Coverage	100
chr7R	65942107	65942324	.	+	PGSB	exon	.	ID=SECCE7Rv1G0465000.1.exon.1;Parent=SECCE7Rv1G0465000.1	SECCE7Rv1G0465000.1	780	present	Chromosome	lo7-cs_q30_rye_filter	SECCE7Rv1G0465000.1	Coverage	100
chr7R	65957153	65958320	.	-	PGSB	exon	.	ID=SECCE7Rv1G0465010.1.exon.1;Parent=SECCE7Rv1G0465010.1	SECCE7Rv1G0465010.1	1117	present	Chromosome	lo7-cs_q30_rye_filter	SECCE7Rv1G0465010.1	Coverage	95.7155
chr7R	66148997	66149699	.	-	PGSB	exon	.	ID=SECCE7Rv1G0465020.1.exon.1;Parent=SECCE7Rv1G0465020.1	SECCE7Rv1G0465020.1	702	present	Chromosome	lo7-cs_q30_rye_filter	SECCE7Rv1G0465020.1	Coverage	100
chr7R	66354190	66355366	.	-	PGSB	exon	.	ID=SECCE7Rv1G0465030.1.exon.1;Parent=SECCE7Rv1G0465030.1	SECCE7Rv1G0465030.1	181	present	Chromosome	lo7-cs_q30_rye_filter	SECCE7Rv1G0465030.1	Coverage	15.3912
chr7R	66358299	66358371	.	-	PGSB	exon	.	ID=SECCE7Rv1G0465040.1.exon.1;Parent=SECCE7Rv1G0465040.1	SECCE7Rv1G0465040.1	71	present	Chromosome	lo7-cs_q30_rye_filter	SECCE7Rv1G0465040.1	Coverage	30.3419
chr7R	66370229	66372575	.	-	PGSB	exon	.	ID=SECCE7Rv1G0465050.1.exon.1;Parent=SECCE7Rv1G0465050.1	SECCE7Rv1G0465050.1	1674	present	Chromosome	lo7-cs_q30_rye_filter	SECCE7Rv1G0465050.1	Coverage	71.3555
chr7R	66393640	66394816	.	-	PGSB	exon	.	ID=SECCE7Rv1G0465060.1.exon.1;Parent=SECCE7Rv1G0465060.1	SECCE7Rv1G0465060.1	743	present	Chromosome	lo7-cs_q30_rye_filter	SECCE7Rv1G0465060.1	Coverage	63.1803
chr7R	66406912	66407107	.	-	PGSB	exon	.	ID=SECCE7Rv1G0465070.1.exon.1;Parent=SECCE7Rv1G0465070.1	SECCE7Rv1G0465070.1	1173	present	Chromosome	lo7-cs_q30_rye_filter	SECCE7Rv1G0465070.1	Coverage	99.2386
chr7R	66571874	66573050	.	-	PGSB	exon	.	ID=SECCE7Rv1G0465080.1.exon.1;Parent=SECCE7Rv1G0465080.1	SECCE7Rv1G0465080.1	896	present	Chromosome	lo7-cs_q30_rye_filter	SECCE7Rv1G0465080.1	Coverage	76.1905
chr7R	66612830	66614006	.	-	PGSB	exon	.	ID=SECCE7Rv1G0465090.1.exon.1;Parent=SECCE7Rv1G0465090.1	SECCE7Rv1G0465090.1	1141	present	Chromosome	lo7-cs_q30_rye_filter	SECCE7Rv1G0465090.1	Coverage	97.0238
chr7R	66635170	66636346	.	-	PGSB	exon	.	ID=SECCE7Rv1G0465100.1.exon.1;Parent=SECCE7Rv1G0465100.1	SECCE7Rv1G0465100.1	1176	present	Chromosome	lo7-cs_q30_rye_filter	SECCE7Rv1G0465100.1	Coverage	100
chr7R	66678188	66679355	.	-	PGSB	exon	.	ID=SECCE7Rv1G0465110.1.exon.1;Parent=SECCE7Rv1G0465110.1	SECCE7Rv1G0465110.1	1167	present	Chromosome	lo7-cs_q30_rye_filter	SECCE7Rv1G0465110.1	Coverage	100
chr7R	67028754	67029063	.	+	PGSB	exon	.	ID=SECCE7Rv1G0465120.1.exon.1;Parent=SECCE7Rv1G0465120.1	SECCE7Rv1G0465120.1	1488	present	Chromosome	lo7-cs_q30_rye_filter	SECCE7Rv1G0465120.1	Coverage	100
chr7R	67047204	67047513	.	-	PGSB	exon	.	ID=SECCE7Rv1G0465130.1.exon.1;Parent=SECCE7Rv1G0465130.1	SECCE7Rv1G0465130.1	309	present	Chromosome	lo7-cs_q30_rye_filter	SECCE7Rv1G0465130.1	Coverage	100
chr7R	67112510	67113578	.	-	PGSB	exon	.	ID=SECCE7Rv1G0465140.1.exon.1;Parent=SECCE7Rv1G0465140.1	SECCE7Rv1G0465140.1	1068	present	Chromosome	lo7-cs_q30_rye_filter	SECCE7Rv1G0465140.1	Coverage	100
chr7R	67274803	67275217	.	+	PGSB	exon	.	ID=SECCE7Rv1G0465150.1.exon.1;Parent=SECCE7Rv1G0465150.1	SECCE7Rv1G0465150.1	942	present	Chromosome	lo7-cs_q30_rye_filter	SECCE7Rv1G0465150.1	Coverage	100
chr7R	67362119	67362266	.	+	PGSB	exon	.	ID=SECCE7Rv1G0465160.1.exon.1;Parent=SECCE7Rv1G0465160.1	SECCE7Rv1G0465160.1	456	present	Chromosome	lo7-cs_q30_rye_filter	SECCE7Rv1G0465160.1	Coverage	100
chr7R	67542882	67543242	.	-	PGSB	exon	.	ID=SECCE7Rv1G0465170.1.exon.1;Parent=SECCE7Rv1G0465170.1	SECCE7Rv1G0465170.1	360	present	Chromosome	lo7-cs_q30_rye_filter	SECCE7Rv1G0465170.1	Coverage	100
chr7R	67590412	67590421	.	+	PGSB	exon	.	ID=SECCE7Rv1G0465180.1.exon.1;Parent=SECCE7Rv1G0465180.1	SECCE7Rv1G0465180.1	408	present	Chromosome	lo7-cs_q30_rye_filter	SECCE7Rv1G0465180.1	Coverage	100
chr7R	67596989	67597340	.	+	PGSB	exon	.	ID=SECCE7Rv1G0465190.1.exon.1;Parent=SECCE7Rv1G0465190.1	SECCE7Rv1G0465190.1	351	present	Chromosome	lo7-cs_q30_rye_filter	SECCE7Rv1G0465190.1	Coverage	100
chr7R	67600680	67601040	.	-	PGSB	exon	.	ID=SECCE7Rv1G0465200.1.exon.1;Parent=SECCE7Rv1G0465200.1	SECCE7Rv1G0465200.1	360	present	Chromosome	lo7-cs_q30_rye_filter	SECCE7Rv1G0465200.1	Coverage	100
chr7R	67607898	67608258	.	-	PGSB	exon	.	ID=SECCE7Rv1G0465210.1.exon.1;Parent=SECCE7Rv1G0465210.1	SECCE7Rv1G0465210.1	360	present	Chromosome	lo7-cs_q30_rye_filter	SECCE7Rv1G0465210.1	Coverage	100
chr7R	67610991	67611330	.	-	PGSB	exon	.	ID=SECCE7Rv1G0465220.1.exon.1;Parent=SECCE7Rv1G0465220.1	SECCE7Rv1G0465220.1	339	present	Chromosome	lo7-cs_q30_rye_filter	SECCE7Rv1G0465220.1	Coverage	100
chr7R	67682319	67682658	.	-	PGSB	exon	.	ID=SECCE7Rv1G0465230.1.exon.1;Parent=SECCE7Rv1G0465230.1	SECCE7Rv1G0465230.1	258	present	Chromosome	lo7-cs_q30_rye_filter	SECCE7Rv1G0465230.1	Coverage	76.1062
chr7R	67696634	67697024	.	-	PGSB	exon	.	ID=SECCE7Rv1G0465240.1.exon.1;Parent=SECCE7Rv1G0465240.1	SECCE7Rv1G0465240.1	0	absent	Chromosome	lo7-cs_q30_rye_filter	SECCE7Rv1G0465240.1	Coverage	0
chr7R	67710584	67710956	.	-	PGSB	exon	.	ID=SECCE7Rv1G0465250.1.exon.1;Parent=SECCE7Rv1G0465250.1	SECCE7Rv1G0465250.1	372	present	Chromosome	lo7-cs_q30_rye_filter	SECCE7Rv1G0465250.1	Coverage	100
chr7R	67714350	67714710	.	-	PGSB	exon	.	ID=SECCE7Rv1G0465260.1.exon.1;Parent=SECCE7Rv1G0465260.1	SECCE7Rv1G0465260.1	360	present	Chromosome	lo7-cs_q30_rye_filter	SECCE7Rv1G0465260.1	Coverage	100
chr7R	68364947	68364999	.	+	PGSB	exon	.	ID=SECCE7Rv1G0465270.1.exon.1;Parent=SECCE7Rv1G0465270.1	SECCE7Rv1G0465270.1	951	present	Chromosome	lo7-cs_q30_rye_filter	SECCE7Rv1G0465270.1	Coverage	100
chr7R	68648464	68648992	.	+	PGSB	exon	.	ID=SECCE7Rv1G0465280.1.exon.1;Parent=SECCE7Rv1G0465280.1	SECCE7Rv1G0465280.1	528	present	Chromosome	lo7-cs_q30_rye_filter	SECCE7Rv1G0465280.1	Coverage	100
chr7R	68658955	68660377	.	-	PGSB	exon	.	ID=SECCE7Rv1G0465290.1.exon.1;Parent=SECCE7Rv1G0465290.1	SECCE7Rv1G0465290.1	869	present	Chromosome	lo7-cs_q30_rye_filter	SECCE7Rv1G0465290.1	Coverage	61.1111
chr7R	68660840	68660957	.	-	PGSB	exon	.	ID=SECCE7Rv1G0465300.1.exon.1;Parent=SECCE7Rv1G0465300.1	SECCE7Rv1G0465300.1	751	present	Chromosome	lo7-cs_q30_rye_filter	SECCE7Rv1G0465300.1	Coverage	65.5323
chr7R	68673518	68673644	.	-	PGSB	exon	.	ID=SECCE7Rv1G0465310.1.exon.1;Parent=SECCE7Rv1G0465310.1	SECCE7Rv1G0465310.1	1164	present	Chromosome	lo7-cs_q30_rye_filter	SECCE7Rv1G0465310.1	Coverage	100
chr7R	68791000	68791726	.	+	PGSB	exon	.	ID=SECCE7Rv1G0465320.1.exon.1;Parent=SECCE7Rv1G0465320.1	SECCE7Rv1G0465320.1	239	present	Chromosome	lo7-cs_q30_rye_filter	SECCE7Rv1G0465320.1	Coverage	32.9201
chr7R	68797172	68797283	.	-	PGSB	exon	.	ID=SECCE7Rv1G0465330.1.exon.1;Parent=SECCE7Rv1G0465330.1	SECCE7Rv1G0465330.1	0	absent	Chromosome	lo7-cs_q30_rye_filter	SECCE7Rv1G0465330.1	Coverage	0
chr7R	69097214	69097493	.	+	PGSB	exon	.	ID=SECCE7Rv1G0465340.1.exon.1;Parent=SECCE7Rv1G0465340.1	SECCE7Rv1G0465340.1	0	absent	Chromosome	lo7-cs_q30_rye_filter	SECCE7Rv1G0465340.1	Coverage	0
chr7R	69098024	69098828	.	+	PGSB	exon	.	ID=SECCE7Rv1G0465350.1.exon.1;Parent=SECCE7Rv1G0465350.1	SECCE7Rv1G0465350.1	0	absent	Chromosome	lo7-cs_q30_rye_filter	SECCE7Rv1G0465350.1	Coverage	0
chr7R	69148446	69148598	.	-	PGSB	exon	.	ID=SECCE7Rv1G0465360.1.exon.1;Parent=SECCE7Rv1G0465360.1	SECCE7Rv1G0465360.1	0	absent	Chromosome	lo7-cs_q30_rye_filter	SECCE7Rv1G0465360.1	Coverage	0
chr7R	69377275	69377623	.	-	PGSB	exon	.	ID=SECCE7Rv1G0465370.1.exon.1;Parent=SECCE7Rv1G0465370.1	SECCE7Rv1G0465370.1	0	absent	Chromosome	lo7-cs_q30_rye_filter	SECCE7Rv1G0465370.1	Coverage	0
chr7R	69421901	69422180	.	+	PGSB	exon	.	ID=SECCE7Rv1G0465380.1.exon.1;Parent=SECCE7Rv1G0465380.1	SECCE7Rv1G0465380.1	0	absent	Chromosome	lo7-cs_q30_rye_filter	SECCE7Rv1G0465380.1	Coverage	0
chr7R	69516723	69516834	.	-	PGSB	exon	.	ID=SECCE7Rv1G0465390.1.exon.1;Parent=SECCE7Rv1G0465390.1	SECCE7Rv1G0465390.1	605	present	Chromosome	lo7-cs_q30_rye_filter	SECCE7Rv1G0465390.1	Coverage	54.95
chr7R	69530889	69531099	.	-	PGSB	exon	.	ID=SECCE7Rv1G0465400.1.exon.1;Parent=SECCE7Rv1G0465400.1	SECCE7Rv1G0465400.1	0	absent	Chromosome	lo7-cs_q30_rye_filter	SECCE7Rv1G0465400.1	Coverage	0
chr7R	69631572	69632042	.	-	PGSB	exon	.	ID=SECCE7Rv1G0465410.1.exon.1;Parent=SECCE7Rv1G0465410.1	SECCE7Rv1G0465410.1	1250	present	Chromosome	lo7-cs_q30_rye_filter	SECCE7Rv1G0465410.1	Coverage	66.5602
chr7R	69717961	69717983	.	+	PGSB	exon	.	ID=SECCE7Rv1G0465420.1.exon.1;Parent=SECCE7Rv1G0465420.1	SECCE7Rv1G0465420.1	468	present	Chromosome	lo7-cs_q30_rye_filter	SECCE7Rv1G0465420.1	Coverage	52
chr7R	69722502	69722902	.	-	PGSB	exon	.	ID=SECCE7Rv1G0465430.1.exon.1;Parent=SECCE7Rv1G0465430.1	SECCE7Rv1G0465430.1	1101	present	Chromosome	lo7-cs_q30_rye_filter	SECCE7Rv1G0465430.1	Coverage	100
chr7R	69935318	69935663	.	-	PGSB	exon	.	ID=SECCE7Rv1G0465440.1.exon.1;Parent=SECCE7Rv1G0465440.1	SECCE7Rv1G0465440.1	1190	present	Chromosome	lo7-cs_q30_rye_filter	SECCE7Rv1G0465440.1	Coverage	99.665
chr7R	69961989	69962103	.	-	PGSB	exon	.	ID=SECCE7Rv1G0465450.1.exon.1;Parent=SECCE7Rv1G0465450.1	SECCE7Rv1G0465450.1	3201	present	Chromosome	lo7-cs_q30_rye_filter	SECCE7Rv1G0465450.1	Coverage	100
chr7R	70215019	70215088	.	-	PGSB	exon	.	ID=SECCE7Rv1G0465460.1.exon.1;Parent=SECCE7Rv1G0465460.1	SECCE7Rv1G0465460.1	1269	present	Chromosome	lo7-cs_q30_rye_filter	SECCE7Rv1G0465460.1	Coverage	100
chr7R	70266446	70266887	.	-	PGSB	exon	.	ID=SECCE7Rv1G0465470.1.exon.1;Parent=SECCE7Rv1G0465470.1	SECCE7Rv1G0465470.1	645	present	Chromosome	lo7-cs_q30_rye_filter	SECCE7Rv1G0465470.1	Coverage	97.7273
chr7R	70479037	70479605	.	-	PGSB	exon	.	ID=SECCE7Rv1G0465480.1.exon.1;Parent=SECCE7Rv1G0465480.1	SECCE7Rv1G0465480.1	582	present	Chromosome	lo7-cs_q30_rye_filter	SECCE7Rv1G0465480.1	Coverage	100
chr7R	70479866	70480058	.	-	PGSB	exon	.	ID=SECCE7Rv1G0465490.1.exon.1;Parent=SECCE7Rv1G0465490.1	SECCE7Rv1G0465490.1	8	absent	Chromosome	lo7-cs_q30_rye_filter	SECCE7Rv1G0465490.1	Coverage	4.16667
chr7R	70638118	70638238	.	+	PGSB	exon	.	ID=SECCE7Rv1G0465500.1.exon.1;Parent=SECCE7Rv1G0465500.1	SECCE7Rv1G0465500.1	645	present	Chromosome	lo7-cs_q30_rye_filter	SECCE7Rv1G0465500.1	Coverage	100
chr7R	70641516	70641651	.	-	PGSB	exon	.	ID=SECCE7Rv1G0465510.1.exon.1;Parent=SECCE7Rv1G0465510.1	SECCE7Rv1G0465510.1	400	present	Chromosome	lo7-cs_q30_rye_filter	SECCE7Rv1G0465510.1	Coverage	69.808
chr7R	70662511	70663312	.	-	PGSB	exon	.	ID=SECCE7Rv1G0465520.1.exon.1;Parent=SECCE7Rv1G0465520.1	SECCE7Rv1G0465520.1	801	present	Chromosome	lo7-cs_q30_rye_filter	SECCE7Rv1G0465520.1	Coverage	100
chr7R	70664056	70664188	.	+	PGSB	exon	.	ID=SECCE7Rv1G0465530.1.exon.1;Parent=SECCE7Rv1G0465530.1	SECCE7Rv1G0465530.1	0	absent	Chromosome	lo7-cs_q30_rye_filter	SECCE7Rv1G0465530.1	Coverage	0
chr7R	70900553	70901914	.	+	PGSB	exon	.	ID=SECCE7Rv1G0465540.1.exon.1;Parent=SECCE7Rv1G0465540.1	SECCE7Rv1G0465540.1	2007	present	Chromosome	lo7-cs_q30_rye_filter	SECCE7Rv1G0465540.1	Coverage	97.807
chr7R	71159782	71162173	.	+	PGSB	exon	.	ID=SECCE7Rv1G0465550.1.exon.1;Parent=SECCE7Rv1G0465550.1	SECCE7Rv1G0465550.1	2337	present	Chromosome	lo7-cs_q30_rye_filter	SECCE7Rv1G0465550.1	Coverage	97.7415
chr7R	71400519	71400816	.	-	PGSB	exon	.	ID=SECCE7Rv1G0465560.1.exon.1;Parent=SECCE7Rv1G0465560.1	SECCE7Rv1G0465560.1	297	present	Chromosome	lo7-cs_q30_rye_filter	SECCE7Rv1G0465560.1	Coverage	100
chr7R	71486902	71487195	.	+	PGSB	exon	.	ID=SECCE7Rv1G0465570.1.exon.1;Parent=SECCE7Rv1G0465570.1	SECCE7Rv1G0465570.1	1692	present	Chromosome	lo7-cs_q30_rye_filter	SECCE7Rv1G0465570.1	Coverage	100
chr7R	71541760	71542189	.	+	PGSB	exon	.	ID=SECCE7Rv1G0465580.1.exon.1;Parent=SECCE7Rv1G0465580.1	SECCE7Rv1G0465580.1	429	present	Chromosome	lo7-cs_q30_rye_filter	SECCE7Rv1G0465580.1	Coverage	100
chr7R	71995174	71995398	.	-	PGSB	exon	.	ID=SECCE7Rv1G0465590.1.exon.1;Parent=SECCE7Rv1G0465590.1	SECCE7Rv1G0465590.1	528	present	Chromosome	lo7-cs_q30_rye_filter	SECCE7Rv1G0465590.1	Coverage	100
chr7R	72156699	72156808	.	-	PGSB	exon	.	ID=SECCE7Rv1G0465600.1.exon.1;Parent=SECCE7Rv1G0465600.1	SECCE7Rv1G0465600.1	1731	present	Chromosome	lo7-cs_q30_rye_filter	SECCE7Rv1G0465600.1	Coverage	100
chr7R	72163195	72163322	.	+	PGSB	exon	.	ID=SECCE7Rv1G0465610.1.exon.1;Parent=SECCE7Rv1G0465610.1	SECCE7Rv1G0465610.1	759	present	Chromosome	lo7-cs_q30_rye_filter	SECCE7Rv1G0465610.1	Coverage	87.2414
chr7R	72230666	72230724	.	+	PGSB	exon	.	ID=SECCE7Rv1G0465620.1.exon.1;Parent=SECCE7Rv1G0465620.1	SECCE7Rv1G0465620.1	1878	present	Chromosome	lo7-cs_q30_rye_filter	SECCE7Rv1G0465620.1	Coverage	70.1008
chr7R	72375153	72375299	.	-	PGSB	exon	.	ID=SECCE7Rv1G0465630.1.exon.1;Parent=SECCE7Rv1G0465630.1	SECCE7Rv1G0465630.1	0	absent	Chromosome	lo7-cs_q30_rye_filter	SECCE7Rv1G0465630.1	Coverage	0
chr7R	72376713	72376863	.	-	PGSB	exon	.	ID=SECCE7Rv1G0465640.1.exon.1;Parent=SECCE7Rv1G0465640.1	SECCE7Rv1G0465640.1	0	absent	Chromosome	lo7-cs_q30_rye_filter	SECCE7Rv1G0465640.1	Coverage	0
chr7R	72379958	72380012	.	+	PGSB	exon	.	ID=SECCE7Rv1G0465650.1.exon.1;Parent=SECCE7Rv1G0465650.1	SECCE7Rv1G0465650.1	937	present	Chromosome	lo7-cs_q30_rye_filter	SECCE7Rv1G0465650.1	Coverage	88.2298
chr7R	72386837	72386846	.	+	PGSB	exon	.	ID=SECCE7Rv1G0465660.1.exon.1;Parent=SECCE7Rv1G0465660.1	SECCE7Rv1G0465660.1	2334	present	Chromosome	lo7-cs_q30_rye_filter	SECCE7Rv1G0465660.1	Coverage	84.7495
chr7R	72433113	72433122	.	-	PGSB	exon	.	ID=SECCE7Rv1G0465670.1.exon.1;Parent=SECCE7Rv1G0465670.1	SECCE7Rv1G0465670.1	0	absent	Chromosome	lo7-cs_q30_rye_filter	SECCE7Rv1G0465670.1	Coverage	0
chr7R	72780247	72780352	.	-	PGSB	exon	.	ID=SECCE7Rv1G0465680.1.exon.1;Parent=SECCE7Rv1G0465680.1	SECCE7Rv1G0465680.1	0	absent	Chromosome	lo7-cs_q30_rye_filter	SECCE7Rv1G0465680.1	Coverage	0
chr7R	72807909	72808801	.	-	PGSB	exon	.	ID=SECCE7Rv1G0465690.1.exon.1;Parent=SECCE7Rv1G0465690.1	SECCE7Rv1G0465690.1	1415	present	Chromosome	lo7-cs_q30_rye_filter	SECCE7Rv1G0465690.1	Coverage	45.9714
chr7R	72918893	72919229	.	+	PGSB	exon	.	ID=SECCE7Rv1G0465700.1.exon.1;Parent=SECCE7Rv1G0465700.1	SECCE7Rv1G0465700.1	336	present	Chromosome	lo7-cs_q30_rye_filter	SECCE7Rv1G0465700.1	Coverage	100
chr7R	72925685	72926027	.	+	PGSB	exon	.	ID=SECCE7Rv1G0465710.1.exon.1;Parent=SECCE7Rv1G0465710.1	SECCE7Rv1G0465710.1	0	absent	Chromosome	lo7-cs_q30_rye_filter	SECCE7Rv1G0465710.1	Coverage	0
chr7R	72930128	72930320	.	-	PGSB	exon	.	ID=SECCE7Rv1G0465720.1.exon.1;Parent=SECCE7Rv1G0465720.1	SECCE7Rv1G0465720.1	0	absent	Chromosome	lo7-cs_q30_rye_filter	SECCE7Rv1G0465720.1	Coverage	0
chr7R	72931312	72931624	.	+	PGSB	exon	.	ID=SECCE7Rv1G0465730.1.exon.1;Parent=SECCE7Rv1G0465730.1	SECCE7Rv1G0465730.1	0	absent	Chromosome	lo7-cs_q30_rye_filter	SECCE7Rv1G0465730.1	Coverage	0
chr7R	72933081	72934509	.	+	PGSB	exon	.	ID=SECCE7Rv1G0465740.1.exon.1;Parent=SECCE7Rv1G0465740.1	SECCE7Rv1G0465740.1	705	present	Chromosome	lo7-cs_q30_rye_filter	SECCE7Rv1G0465740.1	Coverage	49.3697
chr7R	72963753	72965259	.	+	PGSB	exon	.	ID=SECCE7Rv1G0465750.1.exon.1;Parent=SECCE7Rv1G0465750.1	SECCE7Rv1G0465750.1	563	present	Chromosome	lo7-cs_q30_rye_filter	SECCE7Rv1G0465750.1	Coverage	37.3838
chr7R	73085943	73087461	.	+	PGSB	exon	.	ID=SECCE7Rv1G0465760.1.exon.1;Parent=SECCE7Rv1G0465760.1	SECCE7Rv1G0465760.1	226	present	Chromosome	lo7-cs_q30_rye_filter	SECCE7Rv1G0465760.1	Coverage	14.888
chr7R	73097468	73097738	.	+	PGSB	exon	.	ID=SECCE7Rv1G0465770.1.exon.1;Parent=SECCE7Rv1G0465770.1	SECCE7Rv1G0465770.1	0	absent	Chromosome	lo7-cs_q30_rye_filter	SECCE7Rv1G0465770.1	Coverage	0
chr7R	73332638	73334186	.	+	PGSB	exon	.	ID=SECCE7Rv1G0465780.1.exon.1;Parent=SECCE7Rv1G0465780.1	SECCE7Rv1G0465780.1	130	present	Chromosome	lo7-cs_q30_rye_filter	SECCE7Rv1G0465780.1	Coverage	8.39793
chr7R	73454997	73456554	.	+	PGSB	exon	.	ID=SECCE7Rv1G0465790.1.exon.1;Parent=SECCE7Rv1G0465790.1	SECCE7Rv1G0465790.1	1338	present	Chromosome	lo7-cs_q30_rye_filter	SECCE7Rv1G0465790.1	Coverage	85.9345
chr7R	73988480	73990394	.	+	PGSB	exon	.	ID=SECCE7Rv1G0465800.1.exon.1;Parent=SECCE7Rv1G0465800.1	SECCE7Rv1G0465800.1	891	present	Chromosome	lo7-cs_q30_rye_filter	SECCE7Rv1G0465800.1	Coverage	46.5517
chr7R	74078195	74081309	.	-	PGSB	exon	.	ID=SECCE7Rv1G0465810.1.exon.1;Parent=SECCE7Rv1G0465810.1	SECCE7Rv1G0465810.1	432	present	Chromosome	lo7-cs_q30_rye_filter	SECCE7Rv1G0465810.1	Coverage	13.8728
chr7R	74087448	74087888	.	+	PGSB	exon	.	ID=SECCE7Rv1G0465820.1.exon.1;Parent=SECCE7Rv1G0465820.1	SECCE7Rv1G0465820.1	0	absent	Chromosome	lo7-cs_q30_rye_filter	SECCE7Rv1G0465820.1	Coverage	0
chr7R	74185066	74185807	.	-	PGSB	exon	.	ID=SECCE7Rv1G0465830.1.exon.1;Parent=SECCE7Rv1G0465830.1	SECCE7Rv1G0465830.1	741	present	Chromosome	lo7-cs_q30_rye_filter	SECCE7Rv1G0465830.1	Coverage	100
chr7R	74443784	74443901	.	-	PGSB	exon	.	ID=SECCE7Rv1G0465840.1.exon.1;Parent=SECCE7Rv1G0465840.1	SECCE7Rv1G0465840.1	0	absent	Chromosome	lo7-cs_q30_rye_filter	SECCE7Rv1G0465840.1	Coverage	0
chr7R	74992506	74992596	.	+	PGSB	exon	.	ID=SECCE7Rv1G0465850.1.exon.1;Parent=SECCE7Rv1G0465850.1	SECCE7Rv1G0465850.1	484	present	Chromosome	lo7-cs_q30_rye_filter	SECCE7Rv1G0465850.1	Coverage	64.2762
chr7R	75108941	75109482	.	+	PGSB	exon	.	ID=SECCE7Rv1G0465860.1.exon.1;Parent=SECCE7Rv1G0465860.1	SECCE7Rv1G0465860.1	1248	present	Chromosome	lo7-cs_q30_rye_filter	SECCE7Rv1G0465860.1	Coverage	100
chr7R	75116425	75116620	.	-	PGSB	exon	.	ID=SECCE7Rv1G0465870.1.exon.1;Parent=SECCE7Rv1G0465870.1	SECCE7Rv1G0465870.1	195	present	Chromosome	lo7-cs_q30_rye_filter	SECCE7Rv1G0465870.1	Coverage	100
chr7R	75130406	75131885	.	+	PGSB	exon	.	ID=SECCE7Rv1G0465880.1.exon.1;Parent=SECCE7Rv1G0465880.1	SECCE7Rv1G0465880.1	1479	present	Chromosome	lo7-cs_q30_rye_filter	SECCE7Rv1G0465880.1	Coverage	100
chr7R	75140828	75143018	.	-	PGSB	exon	.	ID=SECCE7Rv1G0465890.1.exon.1;Parent=SECCE7Rv1G0465890.1	SECCE7Rv1G0465890.1	2190	present	Chromosome	lo7-cs_q30_rye_filter	SECCE7Rv1G0465890.1	Coverage	100
chr7R	75355275	75357468	.	-	PGSB	exon	.	ID=SECCE7Rv1G0465900.1.exon.1;Parent=SECCE7Rv1G0465900.1	SECCE7Rv1G0465900.1	2193	present	Chromosome	lo7-cs_q30_rye_filter	SECCE7Rv1G0465900.1	Coverage	100
chr7R	75376129	75376246	.	-	PGSB	exon	.	ID=SECCE7Rv1G0465910.1.exon.1;Parent=SECCE7Rv1G0465910.1	SECCE7Rv1G0465910.1	2856	present	Chromosome	lo7-cs_q30_rye_filter	SECCE7Rv1G0465910.1	Coverage	100
chr7R	75521342	75522152	.	-	PGSB	exon	.	ID=SECCE7Rv1G0465920.1.exon.1;Parent=SECCE7Rv1G0465920.1	SECCE7Rv1G0465920.1	440	present	Chromosome	lo7-cs_q30_rye_filter	SECCE7Rv1G0465920.1	Coverage	34.0294
chr7R	75528314	75529324	.	-	PGSB	exon	.	ID=SECCE7Rv1G0465930.1.exon.1;Parent=SECCE7Rv1G0465930.1	SECCE7Rv1G0465930.1	2285	present	Chromosome	lo7-cs_q30_rye_filter	SECCE7Rv1G0465930.1	Coverage	97.7749
chr7R	75666689	75666846	.	+	PGSB	exon	.	ID=SECCE7Rv1G0465940.1.exon.1;Parent=SECCE7Rv1G0465940.1	SECCE7Rv1G0465940.1	579	present	Chromosome	lo7-cs_q30_rye_filter	SECCE7Rv1G0465940.1	Coverage	100
chr7R	75669699	75671034	.	-	PGSB	exon	.	ID=SECCE7Rv1G0465950.1.exon.1;Parent=SECCE7Rv1G0465950.1	SECCE7Rv1G0465950.1	1335	present	Chromosome	lo7-cs_q30_rye_filter	SECCE7Rv1G0465950.1	Coverage	100
chr7R	75673246	75673432	.	-	PGSB	exon	.	ID=SECCE7Rv1G0465960.1.exon.1;Parent=SECCE7Rv1G0465960.1	SECCE7Rv1G0465960.1	624	present	Chromosome	lo7-cs_q30_rye_filter	SECCE7Rv1G0465960.1	Coverage	100
chr7R	75678548	75678782	.	+	PGSB	exon	.	ID=SECCE7Rv1G0465970.1.exon.1;Parent=SECCE7Rv1G0465970.1	SECCE7Rv1G0465970.1	0	absent	Chromosome	lo7-cs_q30_rye_filter	SECCE7Rv1G0465970.1	Coverage	0
chr7R	75679674	75680799	.	-	PGSB	exon	.	ID=SECCE7Rv1G0465980.1.exon.1;Parent=SECCE7Rv1G0465980.1	SECCE7Rv1G0465980.1	629	present	Chromosome	lo7-cs_q30_rye_filter	SECCE7Rv1G0465980.1	Coverage	55.9111
chr7R	75681793	75683524	.	+	PGSB	exon	.	ID=SECCE7Rv1G0465990.1.exon.1;Parent=SECCE7Rv1G0465990.1	SECCE7Rv1G0465990.1	0	absent	Chromosome	lo7-cs_q30_rye_filter	SECCE7Rv1G0465990.1	Coverage	0
chr7R	75694890	75695029	.	+	PGSB	exon	.	ID=SECCE7Rv1G0466000.1.exon.1;Parent=SECCE7Rv1G0466000.1	SECCE7Rv1G0466000.1	555	present	Chromosome	lo7-cs_q30_rye_filter	SECCE7Rv1G0466000.1	Coverage	88.9423
chr7R	75707286	75707906	.	-	PGSB	exon	.	ID=SECCE7Rv1G0466010.1.exon.1;Parent=SECCE7Rv1G0466010.1	SECCE7Rv1G0466010.1	753	present	Chromosome	lo7-cs_q30_rye_filter	SECCE7Rv1G0466010.1	Coverage	100
chr7R	75862588	75862618	.	+	PGSB	exon	.	ID=SECCE7Rv1G0466020.1.exon.1;Parent=SECCE7Rv1G0466020.1	SECCE7Rv1G0466020.1	515	present	Chromosome	lo7-cs_q30_rye_filter	SECCE7Rv1G0466020.1	Coverage	99.8062
chr7R	76119879	76119932	.	+	PGSB	exon	.	ID=SECCE7Rv1G0466030.1.exon.1;Parent=SECCE7Rv1G0466030.1	SECCE7Rv1G0466030.1	114	present	Chromosome	lo7-cs_q30_rye_filter	SECCE7Rv1G0466030.1	Coverage	41.7582
chr7R	76123399	76123798	.	+	PGSB	exon	.	ID=SECCE7Rv1G0466040.1.exon.1;Parent=SECCE7Rv1G0466040.1	SECCE7Rv1G0466040.1	312	present	Chromosome	lo7-cs_q30_rye_filter	SECCE7Rv1G0466040.1	Coverage	19.5857
chr7R	76201918	76202395	.	-	PGSB	exon	.	ID=SECCE7Rv1G0466050.1.exon.1;Parent=SECCE7Rv1G0466050.1	SECCE7Rv1G0466050.1	286	present	Chromosome	lo7-cs_q30_rye_filter	SECCE7Rv1G0466050.1	Coverage	59.9581
chr7R	76207213	76207621	.	-	PGSB	exon	.	ID=SECCE7Rv1G0466060.1.exon.1;Parent=SECCE7Rv1G0466060.1	SECCE7Rv1G0466060.1	2463	present	Chromosome	lo7-cs_q30_rye_filter	SECCE7Rv1G0466060.1	Coverage	93.8286
chr7R	76330194	76330359	.	-	PGSB	exon	.	ID=SECCE7Rv1G0466070.1.exon.1;Parent=SECCE7Rv1G0466070.1	SECCE7Rv1G0466070.1	685	present	Chromosome	lo7-cs_q30_rye_filter	SECCE7Rv1G0466070.1	Coverage	86.4899
chr7R	76363593	76363938	.	+	PGSB	exon	.	ID=SECCE7Rv1G0466080.1.exon.1;Parent=SECCE7Rv1G0466080.1	SECCE7Rv1G0466080.1	345	present	Chromosome	lo7-cs_q30_rye_filter	SECCE7Rv1G0466080.1	Coverage	100
chr7R	76385323	76385522	.	+	PGSB	exon	.	ID=SECCE7Rv1G0466090.1.exon.1;Parent=SECCE7Rv1G0466090.1	SECCE7Rv1G0466090.1	708	present	Chromosome	lo7-cs_q30_rye_filter	SECCE7Rv1G0466090.1	Coverage	100
chr7R	76388721	76388770	.	+	PGSB	exon	.	ID=SECCE7Rv1G0466100.1.exon.1;Parent=SECCE7Rv1G0466100.1	SECCE7Rv1G0466100.1	4247	present	Chromosome	lo7-cs_q30_rye_filter	SECCE7Rv1G0466100.1	Coverage	81.4069
chr7R	76608787	76609393	.	-	PGSB	exon	.	ID=SECCE7Rv1G0466110.1.exon.1;Parent=SECCE7Rv1G0466110.1	SECCE7Rv1G0466110.1	0	absent	Chromosome	lo7-cs_q30_rye_filter	SECCE7Rv1G0466110.1	Coverage	0
chr7R	76694258	76694391	.	+	PGSB	exon	.	ID=SECCE7Rv1G0466120.1.exon.1;Parent=SECCE7Rv1G0466120.1	SECCE7Rv1G0466120.1	798	present	Chromosome	lo7-cs_q30_rye_filter	SECCE7Rv1G0466120.1	Coverage	100
chr7R	76752464	76752577	.	+	PGSB	exon	.	ID=SECCE7Rv1G0466130.1.exon.1;Parent=SECCE7Rv1G0466130.1	SECCE7Rv1G0466130.1	0	absent	Chromosome	lo7-cs_q30_rye_filter	SECCE7Rv1G0466130.1	Coverage	0
chr7R	76753984	76754107	.	+	PGSB	exon	.	ID=SECCE7Rv1G0466140.1.exon.1;Parent=SECCE7Rv1G0466140.1	SECCE7Rv1G0466140.1	0	absent	Chromosome	lo7-cs_q30_rye_filter	SECCE7Rv1G0466140.1	Coverage	0
chr7R	76770021	76772376	.	-	PGSB	exon	.	ID=SECCE7Rv1G0466150.1.exon.1;Parent=SECCE7Rv1G0466150.1	SECCE7Rv1G0466150.1	0	absent	Chromosome	lo7-cs_q30_rye_filter	SECCE7Rv1G0466150.1	Coverage	0
chr7R	76803382	76803651	.	-	PGSB	exon	.	ID=SECCE7Rv1G0466160.1.exon.1;Parent=SECCE7Rv1G0466160.1	SECCE7Rv1G0466160.1	1713	present	Chromosome	lo7-cs_q30_rye_filter	SECCE7Rv1G0466160.1	Coverage	100
chr7R	76939944	76940184	.	+	PGSB	exon	.	ID=SECCE7Rv1G0466170.1.exon.1;Parent=SECCE7Rv1G0466170.1	SECCE7Rv1G0466170.1	600	present	Chromosome	lo7-cs_q30_rye_filter	SECCE7Rv1G0466170.1	Coverage	100
chr7R	76951755	76952181	.	-	PGSB	exon	.	ID=SECCE7Rv1G0466180.1.exon.1;Parent=SECCE7Rv1G0466180.1	SECCE7Rv1G0466180.1	426	present	Chromosome	lo7-cs_q30_rye_filter	SECCE7Rv1G0466180.1	Coverage	100
chr7R	77063744	77065040	.	-	PGSB	exon	.	ID=SECCE7Rv1G0466190.1.exon.1;Parent=SECCE7Rv1G0466190.1	SECCE7Rv1G0466190.1	274	present	Chromosome	lo7-cs_q30_rye_filter	SECCE7Rv1G0466190.1	Coverage	21.142
chr7R	77079415	77079547	.	-	PGSB	exon	.	ID=SECCE7Rv1G0466200.1.exon.1;Parent=SECCE7Rv1G0466200.1	SECCE7Rv1G0466200.1	547	present	Chromosome	lo7-cs_q30_rye_filter	SECCE7Rv1G0466200.1	Coverage	89.3791
chr7R	77351292	77351315	.	-	PGSB	exon	.	ID=SECCE7Rv1G0466210.1.exon.1;Parent=SECCE7Rv1G0466210.1	SECCE7Rv1G0466210.1	0	absent	Chromosome	lo7-cs_q30_rye_filter	SECCE7Rv1G0466210.1	Coverage	0
chr7R	77417110	77418472	.	+	PGSB	exon	.	ID=SECCE7Rv1G0466220.1.exon.1;Parent=SECCE7Rv1G0466220.1	SECCE7Rv1G0466220.1	750	present	Chromosome	lo7-cs_q30_rye_filter	SECCE7Rv1G0466220.1	Coverage	55.0661
chr7R	77421674	77423045	.	+	PGSB	exon	.	ID=SECCE7Rv1G0466230.1.exon.1;Parent=SECCE7Rv1G0466230.1	SECCE7Rv1G0466230.1	0	absent	Chromosome	lo7-cs_q30_rye_filter	SECCE7Rv1G0466230.1	Coverage	0
chr7R	77514960	77517888	.	-	PGSB	exon	.	ID=SECCE7Rv1G0466240.1.exon.1;Parent=SECCE7Rv1G0466240.1	SECCE7Rv1G0466240.1	0	absent	Chromosome	lo7-cs_q30_rye_filter	SECCE7Rv1G0466240.1	Coverage	0
chr7R	77536347	77536539	.	-	PGSB	exon	.	ID=SECCE7Rv1G0466250.1.exon.1;Parent=SECCE7Rv1G0466250.1	SECCE7Rv1G0466250.1	56	present	Chromosome	lo7-cs_q30_rye_filter	SECCE7Rv1G0466250.1	Coverage	12.6126
chr7R	77599001	77599100	.	-	PGSB	exon	.	ID=SECCE7Rv1G0466260.1.exon.1;Parent=SECCE7Rv1G0466260.1	SECCE7Rv1G0466260.1	0	absent	Chromosome	lo7-cs_q30_rye_filter	SECCE7Rv1G0466260.1	Coverage	0
chr7R	77963617	77963654	.	+	PGSB	exon	.	ID=SECCE7Rv1G0466270.1.exon.1;Parent=SECCE7Rv1G0466270.1	SECCE7Rv1G0466270.1	0	absent	Chromosome	lo7-cs_q30_rye_filter	SECCE7Rv1G0466270.1	Coverage	0
chr7R	77964128	77964245	.	+	PGSB	exon	.	ID=SECCE7Rv1G0466280.1.exon.1;Parent=SECCE7Rv1G0466280.1	SECCE7Rv1G0466280.1	0	absent	Chromosome	lo7-cs_q30_rye_filter	SECCE7Rv1G0466280.1	Coverage	0
chr7R	77995448	77996210	.	+	PGSB	exon	.	ID=SECCE7Rv1G0466290.1.exon.1;Parent=SECCE7Rv1G0466290.1	SECCE7Rv1G0466290.1	900	present	Chromosome	lo7-cs_q30_rye_filter	SECCE7Rv1G0466290.1	Coverage	81.7439
chr7R	78066283	78066750	.	-	PGSB	exon	.	ID=SECCE7Rv1G0466300.1.exon.1;Parent=SECCE7Rv1G0466300.1	SECCE7Rv1G0466300.1	1062	present	Chromosome	lo7-cs_q30_rye_filter	SECCE7Rv1G0466300.1	Coverage	79.9097
chr7R	78082692	78083067	.	-	PGSB	exon	.	ID=SECCE7Rv1G0466310.1.exon.1;Parent=SECCE7Rv1G0466310.1	SECCE7Rv1G0466310.1	375	present	Chromosome	lo7-cs_q30_rye_filter	SECCE7Rv1G0466310.1	Coverage	100
chr7R	78084752	78085061	.	-	PGSB	exon	.	ID=SECCE7Rv1G0466320.1.exon.1;Parent=SECCE7Rv1G0466320.1	SECCE7Rv1G0466320.1	337	present	Chromosome	lo7-cs_q30_rye_filter	SECCE7Rv1G0466320.1	Coverage	59.7518
chr7R	78194206	78194497	.	-	PGSB	exon	.	ID=SECCE7Rv1G0466330.1.exon.1;Parent=SECCE7Rv1G0466330.1	SECCE7Rv1G0466330.1	291	present	Chromosome	lo7-cs_q30_rye_filter	SECCE7Rv1G0466330.1	Coverage	100
chr7R	78319965	78320062	.	+	PGSB	exon	.	ID=SECCE7Rv1G0466340.1.exon.1;Parent=SECCE7Rv1G0466340.1	SECCE7Rv1G0466340.1	339	present	Chromosome	lo7-cs_q30_rye_filter	SECCE7Rv1G0466340.1	Coverage	100
chr7R	78399779	78400454	.	-	PGSB	exon	.	ID=SECCE7Rv1G0466350.1.exon.1;Parent=SECCE7Rv1G0466350.1	SECCE7Rv1G0466350.1	339	present	Chromosome	lo7-cs_q30_rye_filter	SECCE7Rv1G0466350.1	Coverage	50.2222
chr7R	78401145	78401295	.	-	PGSB	exon	.	ID=SECCE7Rv1G0466360.1.exon.1;Parent=SECCE7Rv1G0466360.1	SECCE7Rv1G0466360.1	394	present	Chromosome	lo7-cs_q30_rye_filter	SECCE7Rv1G0466360.1	Coverage	15.0439
chr7R	78479254	78479697	.	+	PGSB	exon	.	ID=SECCE7Rv1G0466370.1.exon.1;Parent=SECCE7Rv1G0466370.1	SECCE7Rv1G0466370.1	0	absent	Chromosome	lo7-cs_q30_rye_filter	SECCE7Rv1G0466370.1	Coverage	0
chr7R	78482303	78483044	.	+	PGSB	exon	.	ID=SECCE7Rv1G0466380.1.exon.1;Parent=SECCE7Rv1G0466380.1	SECCE7Rv1G0466380.1	832	present	Chromosome	lo7-cs_q30_rye_filter	SECCE7Rv1G0466380.1	Coverage	79.4651
chr7R	78491345	78492017	.	+	PGSB	exon	.	ID=SECCE7Rv1G0466390.1.exon.1;Parent=SECCE7Rv1G0466390.1	SECCE7Rv1G0466390.1	672	present	Chromosome	lo7-cs_q30_rye_filter	SECCE7Rv1G0466390.1	Coverage	68.7117
chr7R	78651248	78652250	.	+	PGSB	exon	.	ID=SECCE7Rv1G0466400.1.exon.1;Parent=SECCE7Rv1G0466400.1	SECCE7Rv1G0466400.1	1115	present	Chromosome	lo7-cs_q30_rye_filter	SECCE7Rv1G0466400.1	Coverage	85.4406
chr7R	78653978	78654237	.	-	PGSB	exon	.	ID=SECCE7Rv1G0466410.1.exon.1;Parent=SECCE7Rv1G0466410.1	SECCE7Rv1G0466410.1	413	present	Chromosome	lo7-cs_q30_rye_filter	SECCE7Rv1G0466410.1	Coverage	50.0606
chr7R	78656128	78656539	.	+	PGSB	exon	.	ID=SECCE7Rv1G0466420.1.exon.1;Parent=SECCE7Rv1G0466420.1	SECCE7Rv1G0466420.1	522	present	Chromosome	lo7-cs_q30_rye_filter	SECCE7Rv1G0466420.1	Coverage	58.5859
chr7R	78658079	78658436	.	-	PGSB	exon	.	ID=SECCE7Rv1G0466430.1.exon.1;Parent=SECCE7Rv1G0466430.1	SECCE7Rv1G0466430.1	27	present	Chromosome	lo7-cs_q30_rye_filter	SECCE7Rv1G0466430.1	Coverage	7.56303
chr7R	78721251	78721882	.	+	PGSB	exon	.	ID=SECCE7Rv1G0466440.1.exon.1;Parent=SECCE7Rv1G0466440.1	SECCE7Rv1G0466440.1	1394	present	Chromosome	lo7-cs_q30_rye_filter	SECCE7Rv1G0466440.1	Coverage	51.5723
chr7R	78859118	78859410	.	-	PGSB	exon	.	ID=SECCE7Rv1G0466450.1.exon.1;Parent=SECCE7Rv1G0466450.1	SECCE7Rv1G0466450.1	1134	present	Chromosome	lo7-cs_q30_rye_filter	SECCE7Rv1G0466450.1	Coverage	100
chr7R	79357097	79357412	.	+	PGSB	exon	.	ID=SECCE7Rv1G0466460.1.exon.1;Parent=SECCE7Rv1G0466460.1	SECCE7Rv1G0466460.1	315	present	Chromosome	lo7-cs_q30_rye_filter	SECCE7Rv1G0466460.1	Coverage	100
chr7R	79360583	79360680	.	+	PGSB	exon	.	ID=SECCE7Rv1G0466470.1.exon.1;Parent=SECCE7Rv1G0466470.1	SECCE7Rv1G0466470.1	1287	present	Chromosome	lo7-cs_q30_rye_filter	SECCE7Rv1G0466470.1	Coverage	100
chr7R	79367546	79367618	.	-	PGSB	exon	.	ID=SECCE7Rv1G0466480.1.exon.1;Parent=SECCE7Rv1G0466480.1	SECCE7Rv1G0466480.1	262	present	Chromosome	lo7-cs_q30_rye_filter	SECCE7Rv1G0466480.1	Coverage	28.172
chr7R	79382074	79382449	.	-	PGSB	exon	.	ID=SECCE7Rv1G0466490.1.exon.1;Parent=SECCE7Rv1G0466490.1	SECCE7Rv1G0466490.1	375	present	Chromosome	lo7-cs_q30_rye_filter	SECCE7Rv1G0466490.1	Coverage	100
chr7R	79384252	79384344	.	-	PGSB	exon	.	ID=SECCE7Rv1G0466500.1.exon.1;Parent=SECCE7Rv1G0466500.1	SECCE7Rv1G0466500.1	324	present	Chromosome	lo7-cs_q30_rye_filter	SECCE7Rv1G0466500.1	Coverage	100
chr7R	79456115	79456389	.	+	PGSB	exon	.	ID=SECCE7Rv1G0466510.1.exon.1;Parent=SECCE7Rv1G0466510.1	SECCE7Rv1G0466510.1	294	present	Chromosome	lo7-cs_q30_rye_filter	SECCE7Rv1G0466510.1	Coverage	100
chr7R	79477498	79477927	.	+	PGSB	exon	.	ID=SECCE7Rv1G0466520.1.exon.1;Parent=SECCE7Rv1G0466520.1	SECCE7Rv1G0466520.1	429	present	Chromosome	lo7-cs_q30_rye_filter	SECCE7Rv1G0466520.1	Coverage	100
chr7R	79487201	79487630	.	+	PGSB	exon	.	ID=SECCE7Rv1G0466530.1.exon.1;Parent=SECCE7Rv1G0466530.1	SECCE7Rv1G0466530.1	429	present	Chromosome	lo7-cs_q30_rye_filter	SECCE7Rv1G0466530.1	Coverage	100
chr7R	79503082	79503511	.	+	PGSB	exon	.	ID=SECCE7Rv1G0466540.1.exon.1;Parent=SECCE7Rv1G0466540.1	SECCE7Rv1G0466540.1	429	present	Chromosome	lo7-cs_q30_rye_filter	SECCE7Rv1G0466540.1	Coverage	100
chr7R	79533315	79533744	.	+	PGSB	exon	.	ID=SECCE7Rv1G0466550.1.exon.1;Parent=SECCE7Rv1G0466550.1	SECCE7Rv1G0466550.1	429	present	Chromosome	lo7-cs_q30_rye_filter	SECCE7Rv1G0466550.1	Coverage	100
chr7R	79559480	79559909	.	+	PGSB	exon	.	ID=SECCE7Rv1G0466560.1.exon.1;Parent=SECCE7Rv1G0466560.1	SECCE7Rv1G0466560.1	429	present	Chromosome	lo7-cs_q30_rye_filter	SECCE7Rv1G0466560.1	Coverage	100
chr7R	79577091	79577520	.	+	PGSB	exon	.	ID=SECCE7Rv1G0466570.1.exon.1;Parent=SECCE7Rv1G0466570.1	SECCE7Rv1G0466570.1	0	absent	Chromosome	lo7-cs_q30_rye_filter	SECCE7Rv1G0466570.1	Coverage	0
chr7R	79595179	79595608	.	+	PGSB	exon	.	ID=SECCE7Rv1G0466580.1.exon.1;Parent=SECCE7Rv1G0466580.1	SECCE7Rv1G0466580.1	342	present	Chromosome	lo7-cs_q30_rye_filter	SECCE7Rv1G0466580.1	Coverage	79.7203
chr7R	79827860	79828289	.	+	PGSB	exon	.	ID=SECCE7Rv1G0466590.1.exon.1;Parent=SECCE7Rv1G0466590.1	SECCE7Rv1G0466590.1	429	present	Chromosome	lo7-cs_q30_rye_filter	SECCE7Rv1G0466590.1	Coverage	100
chr7R	79907954	79908376	.	-	PGSB	exon	.	ID=SECCE7Rv1G0466600.1.exon.1;Parent=SECCE7Rv1G0466600.1	SECCE7Rv1G0466600.1	1560	present	Chromosome	lo7-cs_q30_rye_filter	SECCE7Rv1G0466600.1	Coverage	99.8081
chr7R	80068722	80068867	.	-	PGSB	exon	.	ID=SECCE7Rv1G0466610.1.exon.1;Parent=SECCE7Rv1G0466610.1	SECCE7Rv1G0466610.1	723	present	Chromosome	lo7-cs_q30_rye_filter	SECCE7Rv1G0466610.1	Coverage	100
chr7R	80082226	80082550	.	-	PGSB	exon	.	ID=SECCE7Rv1G0466620.1.exon.1;Parent=SECCE7Rv1G0466620.1	SECCE7Rv1G0466620.1	324	present	Chromosome	lo7-cs_q30_rye_filter	SECCE7Rv1G0466620.1	Coverage	100
chr7R	80409294	80409395	.	+	PGSB	exon	.	ID=SECCE7Rv1G0466630.1.exon.1;Parent=SECCE7Rv1G0466630.1	SECCE7Rv1G0466630.1	924	present	Chromosome	lo7-cs_q30_rye_filter	SECCE7Rv1G0466630.1	Coverage	100
chr7R	80414099	80414435	.	-	PGSB	exon	.	ID=SECCE7Rv1G0466640.1.exon.1;Parent=SECCE7Rv1G0466640.1	SECCE7Rv1G0466640.1	852	present	Chromosome	lo7-cs_q30_rye_filter	SECCE7Rv1G0466640.1	Coverage	100
chr7R	80449559	80449847	.	-	PGSB	exon	.	ID=SECCE7Rv1G0466650.1.exon.1;Parent=SECCE7Rv1G0466650.1	SECCE7Rv1G0466650.1	288	present	Chromosome	lo7-cs_q30_rye_filter	SECCE7Rv1G0466650.1	Coverage	100
chr7R	80595985	80596924	.	+	PGSB	exon	.	ID=SECCE7Rv1G0466660.1.exon.1;Parent=SECCE7Rv1G0466660.1	SECCE7Rv1G0466660.1	623	present	Chromosome	lo7-cs_q30_rye_filter	SECCE7Rv1G0466660.1	Coverage	66.3472
chr7R	80612278	80612357	.	-	PGSB	exon	.	ID=SECCE7Rv1G0466670.1.exon.1;Parent=SECCE7Rv1G0466670.1	SECCE7Rv1G0466670.1	967	present	Chromosome	lo7-cs_q30_rye_filter	SECCE7Rv1G0466670.1	Coverage	92.3591
chr7R	80688670	80688862	.	+	PGSB	exon	.	ID=SECCE7Rv1G0466680.1.exon.1;Parent=SECCE7Rv1G0466680.1	SECCE7Rv1G0466680.1	0	absent	Chromosome	lo7-cs_q30_rye_filter	SECCE7Rv1G0466680.1	Coverage	0
chr7R	80702863	80703103	.	+	PGSB	exon	.	ID=SECCE7Rv1G0466690.1.exon.1;Parent=SECCE7Rv1G0466690.1	SECCE7Rv1G0466690.1	204	present	Chromosome	lo7-cs_q30_rye_filter	SECCE7Rv1G0466690.1	Coverage	85
chr7R	80812914	80813706	.	+	PGSB	exon	.	ID=SECCE7Rv1G0466700.1.exon.1;Parent=SECCE7Rv1G0466700.1	SECCE7Rv1G0466700.1	658	present	Chromosome	lo7-cs_q30_rye_filter	SECCE7Rv1G0466700.1	Coverage	60.4224
chr7R	80819470	80820241	.	+	PGSB	exon	.	ID=SECCE7Rv1G0466710.1.exon.1;Parent=SECCE7Rv1G0466710.1	SECCE7Rv1G0466710.1	819	present	Chromosome	lo7-cs_q30_rye_filter	SECCE7Rv1G0466710.1	Coverage	76.6854
chr7R	80834133	80834727	.	-	PGSB	exon	.	ID=SECCE7Rv1G0466720.1.exon.1;Parent=SECCE7Rv1G0466720.1	SECCE7Rv1G0466720.1	594	present	Chromosome	lo7-cs_q30_rye_filter	SECCE7Rv1G0466720.1	Coverage	100
chr7R	80845116	80845623	.	+	PGSB	exon	.	ID=SECCE7Rv1G0466730.1.exon.1;Parent=SECCE7Rv1G0466730.1	SECCE7Rv1G0466730.1	1440	present	Chromosome	lo7-cs_q30_rye_filter	SECCE7Rv1G0466730.1	Coverage	97.7597
chr7R	80994441	80994729	.	-	PGSB	exon	.	ID=SECCE7Rv1G0466740.1.exon.1;Parent=SECCE7Rv1G0466740.1	SECCE7Rv1G0466740.1	193	present	Chromosome	lo7-cs_q30_rye_filter	SECCE7Rv1G0466740.1	Coverage	67.0139
chr7R	80997690	80997747	.	+	PGSB	exon	.	ID=SECCE7Rv1G0466750.1.exon.1;Parent=SECCE7Rv1G0466750.1	SECCE7Rv1G0466750.1	0	absent	Chromosome	lo7-cs_q30_rye_filter	SECCE7Rv1G0466750.1	Coverage	0
chr7R	81238279	81238525	.	+	PGSB	exon	.	ID=SECCE7Rv1G0466760.1.exon.1;Parent=SECCE7Rv1G0466760.1	SECCE7Rv1G0466760.1	0	absent	Chromosome	lo7-cs_q30_rye_filter	SECCE7Rv1G0466760.1	Coverage	0
chr7R	81292939	81293929	.	-	PGSB	exon	.	ID=SECCE7Rv1G0466770.1.exon.1;Parent=SECCE7Rv1G0466770.1	SECCE7Rv1G0466770.1	0	absent	Chromosome	lo7-cs_q30_rye_filter	SECCE7Rv1G0466770.1	Coverage	0
chr7R	81308854	81309387	.	+	PGSB	exon	.	ID=SECCE7Rv1G0466780.1.exon.1;Parent=SECCE7Rv1G0466780.1	SECCE7Rv1G0466780.1	185	present	Chromosome	lo7-cs_q30_rye_filter	SECCE7Rv1G0466780.1	Coverage	19.392
chr7R	81380248	81380470	.	-	PGSB	exon	.	ID=SECCE7Rv1G0466790.1.exon.1;Parent=SECCE7Rv1G0466790.1	SECCE7Rv1G0466790.1	289	present	Chromosome	lo7-cs_q30_rye_filter	SECCE7Rv1G0466790.1	Coverage	52.0721
chr7R	81420716	81421079	.	-	PGSB	exon	.	ID=SECCE7Rv1G0466800.1.exon.1;Parent=SECCE7Rv1G0466800.1	SECCE7Rv1G0466800.1	0	absent	Chromosome	lo7-cs_q30_rye_filter	SECCE7Rv1G0466800.1	Coverage	0
chr7R	81421192	81421537	.	-	PGSB	exon	.	ID=SECCE7Rv1G0466810.1.exon.1;Parent=SECCE7Rv1G0466810.1	SECCE7Rv1G0466810.1	0	absent	Chromosome	lo7-cs_q30_rye_filter	SECCE7Rv1G0466810.1	Coverage	0
chr7R	81442168	81444196	.	-	PGSB	exon	.	ID=SECCE7Rv1G0466820.1.exon.1;Parent=SECCE7Rv1G0466820.1	SECCE7Rv1G0466820.1	410	present	Chromosome	lo7-cs_q30_rye_filter	SECCE7Rv1G0466820.1	Coverage	20.217
chr7R	81565964	81566097	.	-	PGSB	exon	.	ID=SECCE7Rv1G0466830.1.exon.1;Parent=SECCE7Rv1G0466830.1	SECCE7Rv1G0466830.1	338	present	Chromosome	lo7-cs_q30_rye_filter	SECCE7Rv1G0466830.1	Coverage	44.0104
chr7R	81701632	81701792	.	-	PGSB	exon	.	ID=SECCE7Rv1G0466840.1.exon.1;Parent=SECCE7Rv1G0466840.1	SECCE7Rv1G0466840.1	0	absent	Chromosome	lo7-cs_q30_rye_filter	SECCE7Rv1G0466840.1	Coverage	0
chr7R	81926340	81927696	.	+	PGSB	exon	.	ID=SECCE7Rv1G0466850.1.exon.1;Parent=SECCE7Rv1G0466850.1	SECCE7Rv1G0466850.1	2392	present	Chromosome	lo7-cs_q30_rye_filter	SECCE7Rv1G0466850.1	Coverage	93.3646
chr7R	82081718	82081743	.	+	PGSB	exon	.	ID=SECCE7Rv1G0466860.1.exon.1;Parent=SECCE7Rv1G0466860.1	SECCE7Rv1G0466860.1	606	present	Chromosome	lo7-cs_q30_rye_filter	SECCE7Rv1G0466860.1	Coverage	83.1276
chr7R	82091259	82091460	.	+	PGSB	exon	.	ID=SECCE7Rv1G0466870.1.exon.1;Parent=SECCE7Rv1G0466870.1	SECCE7Rv1G0466870.1	201	present	Chromosome	lo7-cs_q30_rye_filter	SECCE7Rv1G0466870.1	Coverage	100
chr7R	82098043	82098244	.	+	PGSB	exon	.	ID=SECCE7Rv1G0466880.1.exon.1;Parent=SECCE7Rv1G0466880.1	SECCE7Rv1G0466880.1	201	present	Chromosome	lo7-cs_q30_rye_filter	SECCE7Rv1G0466880.1	Coverage	100
chr7R	82108517	82108835	.	-	PGSB	exon	.	ID=SECCE7Rv1G0466890.1.exon.1;Parent=SECCE7Rv1G0466890.1	SECCE7Rv1G0466890.1	1452	present	Chromosome	lo7-cs_q30_rye_filter	SECCE7Rv1G0466890.1	Coverage	100
chr7R	82397417	82397711	.	+	PGSB	exon	.	ID=SECCE7Rv1G0466900.1.exon.1;Parent=SECCE7Rv1G0466900.1	SECCE7Rv1G0466900.1	1473	present	Chromosome	lo7-cs_q30_rye_filter	SECCE7Rv1G0466900.1	Coverage	100
chr7R	82401166	82402129	.	-	PGSB	exon	.	ID=SECCE7Rv1G0466910.1.exon.1;Parent=SECCE7Rv1G0466910.1	SECCE7Rv1G0466910.1	963	present	Chromosome	lo7-cs_q30_rye_filter	SECCE7Rv1G0466910.1	Coverage	100
chr7R	82404252	82404348	.	-	PGSB	exon	.	ID=SECCE7Rv1G0466920.1.exon.1;Parent=SECCE7Rv1G0466920.1	SECCE7Rv1G0466920.1	2355	present	Chromosome	lo7-cs_q30_rye_filter	SECCE7Rv1G0466920.1	Coverage	100
chr7R	82422807	82424999	.	+	PGSB	exon	.	ID=SECCE7Rv1G0466930.1.exon.1;Parent=SECCE7Rv1G0466930.1	SECCE7Rv1G0466930.1	0	absent	Chromosome	lo7-cs_q30_rye_filter	SECCE7Rv1G0466930.1	Coverage	0
chr7R	82427386	82428406	.	-	PGSB	exon	.	ID=SECCE7Rv1G0466940.1.exon.1;Parent=SECCE7Rv1G0466940.1	SECCE7Rv1G0466940.1	45	absent	Chromosome	lo7-cs_q30_rye_filter	SECCE7Rv1G0466940.1	Coverage	4.41176
chr7R	82442431	82442665	.	+	PGSB	exon	.	ID=SECCE7Rv1G0466950.1.exon.1;Parent=SECCE7Rv1G0466950.1	SECCE7Rv1G0466950.1	0	absent	Chromosome	lo7-cs_q30_rye_filter	SECCE7Rv1G0466950.1	Coverage	0
chr7R	82630010	82630301	.	+	PGSB	exon	.	ID=SECCE7Rv1G0466960.1.exon.1;Parent=SECCE7Rv1G0466960.1	SECCE7Rv1G0466960.1	291	present	Chromosome	lo7-cs_q30_rye_filter	SECCE7Rv1G0466960.1	Coverage	100
chr7R	82633319	82633478	.	-	PGSB	exon	.	ID=SECCE7Rv1G0466970.1.exon.1;Parent=SECCE7Rv1G0466970.1	SECCE7Rv1G0466970.1	969	present	Chromosome	lo7-cs_q30_rye_filter	SECCE7Rv1G0466970.1	Coverage	83.0334
chr7R	82733325	82733416	.	-	PGSB	exon	.	ID=SECCE7Rv1G0466980.1.exon.1;Parent=SECCE7Rv1G0466980.1	SECCE7Rv1G0466980.1	1479	present	Chromosome	lo7-cs_q30_rye_filter	SECCE7Rv1G0466980.1	Coverage	100
chr7R	82910617	82910995	.	+	PGSB	exon	.	ID=SECCE7Rv1G0466990.1.exon.1;Parent=SECCE7Rv1G0466990.1	SECCE7Rv1G0466990.1	195	present	Chromosome	lo7-cs_q30_rye_filter	SECCE7Rv1G0466990.1	Coverage	51.5873
chr7R	82974628	82974777	.	+	PGSB	exon	.	ID=SECCE7Rv1G0467000.1.exon.1;Parent=SECCE7Rv1G0467000.1	SECCE7Rv1G0467000.1	576	present	Chromosome	lo7-cs_q30_rye_filter	SECCE7Rv1G0467000.1	Coverage	72.7273
chr7R	82982950	82983115	.	+	PGSB	exon	.	ID=SECCE7Rv1G0467010.1.exon.1;Parent=SECCE7Rv1G0467010.1	SECCE7Rv1G0467010.1	522	present	Chromosome	lo7-cs_q30_rye_filter	SECCE7Rv1G0467010.1	Coverage	100
chr7R	82985875	82986400	.	-	PGSB	exon	.	ID=SECCE7Rv1G0467020.1.exon.1;Parent=SECCE7Rv1G0467020.1	SECCE7Rv1G0467020.1	11	absent	Chromosome	lo7-cs_q30_rye_filter	SECCE7Rv1G0467020.1	Coverage	2.09524
chr7R	82993536	82993565	.	-	PGSB	exon	.	ID=SECCE7Rv1G0467030.1.exon.1;Parent=SECCE7Rv1G0467030.1	SECCE7Rv1G0467030.1	1301	present	Chromosome	lo7-cs_q30_rye_filter	SECCE7Rv1G0467030.1	Coverage	98.3371
chr7R	82997028	82997057	.	-	PGSB	exon	.	ID=SECCE7Rv1G0467040.1.exon.1;Parent=SECCE7Rv1G0467040.1	SECCE7Rv1G0467040.1	1332	present	Chromosome	lo7-cs_q30_rye_filter	SECCE7Rv1G0467040.1	Coverage	100
chr7R	83001298	83001652	.	+	PGSB	exon	.	ID=SECCE7Rv1G0467050.1.exon.1;Parent=SECCE7Rv1G0467050.1	SECCE7Rv1G0467050.1	354	present	Chromosome	lo7-cs_q30_rye_filter	SECCE7Rv1G0467050.1	Coverage	100
chr7R	83174830	83175202	.	+	PGSB	exon	.	ID=SECCE7Rv1G0467060.1.exon.1;Parent=SECCE7Rv1G0467060.1	SECCE7Rv1G0467060.1	372	present	Chromosome	lo7-cs_q30_rye_filter	SECCE7Rv1G0467060.1	Coverage	100
chr7R	83258249	83258609	.	+	PGSB	exon	.	ID=SECCE7Rv1G0467070.1.exon.1;Parent=SECCE7Rv1G0467070.1	SECCE7Rv1G0467070.1	360	present	Chromosome	lo7-cs_q30_rye_filter	SECCE7Rv1G0467070.1	Coverage	100
chr7R	83283251	83283818	.	-	PGSB	exon	.	ID=SECCE7Rv1G0467080.1.exon.1;Parent=SECCE7Rv1G0467080.1	SECCE7Rv1G0467080.1	567	present	Chromosome	lo7-cs_q30_rye_filter	SECCE7Rv1G0467080.1	Coverage	100
chr7R	83290533	83291010	.	+	PGSB	exon	.	ID=SECCE7Rv1G0467090.1.exon.1;Parent=SECCE7Rv1G0467090.1	SECCE7Rv1G0467090.1	477	present	Chromosome	lo7-cs_q30_rye_filter	SECCE7Rv1G0467090.1	Coverage	100
chr7R	83473717	83473906	.	+	PGSB	exon	.	ID=SECCE7Rv1G0467100.1.exon.1;Parent=SECCE7Rv1G0467100.1	SECCE7Rv1G0467100.1	1083	present	Chromosome	lo7-cs_q30_rye_filter	SECCE7Rv1G0467100.1	Coverage	100
chr7R	83608679	83608928	.	-	PGSB	exon	.	ID=SECCE7Rv1G0467110.1.exon.1;Parent=SECCE7Rv1G0467110.1	SECCE7Rv1G0467110.1	249	present	Chromosome	lo7-cs_q30_rye_filter	SECCE7Rv1G0467110.1	Coverage	100
chr7R	83623360	83623636	.	-	PGSB	exon	.	ID=SECCE7Rv1G0467120.1.exon.1;Parent=SECCE7Rv1G0467120.1	SECCE7Rv1G0467120.1	276	present	Chromosome	lo7-cs_q30_rye_filter	SECCE7Rv1G0467120.1	Coverage	100
chr7R	83624805	83625001	.	-	PGSB	exon	.	ID=SECCE7Rv1G0467130.1.exon.1;Parent=SECCE7Rv1G0467130.1	SECCE7Rv1G0467130.1	973	present	Chromosome	lo7-cs_q30_rye_filter	SECCE7Rv1G0467130.1	Coverage	32.144
chr7R	83740895	83744828	.	-	PGSB	exon	.	ID=SECCE7Rv1G0467140.1.exon.1;Parent=SECCE7Rv1G0467140.1	SECCE7Rv1G0467140.1	0	absent	Chromosome	lo7-cs_q30_rye_filter	SECCE7Rv1G0467140.1	Coverage	0
chr7R	83745031	83746465	.	-	PGSB	exon	.	ID=SECCE7Rv1G0467150.1.exon.1;Parent=SECCE7Rv1G0467150.1	SECCE7Rv1G0467150.1	0	absent	Chromosome	lo7-cs_q30_rye_filter	SECCE7Rv1G0467150.1	Coverage	0
chr7R	83747021	83747065	.	-	PGSB	exon	.	ID=SECCE7Rv1G0467160.1.exon.1;Parent=SECCE7Rv1G0467160.1	SECCE7Rv1G0467160.1	946	present	Chromosome	lo7-cs_q30_rye_filter	SECCE7Rv1G0467160.1	Coverage	65.6944
chr7R	84039857	84040010	.	-	PGSB	exon	.	ID=SECCE7Rv1G0467170.1.exon.1;Parent=SECCE7Rv1G0467170.1	SECCE7Rv1G0467170.1	258	present	Chromosome	lo7-cs_q30_rye_filter	SECCE7Rv1G0467170.1	Coverage	100
chr7R	84171256	84171565	.	+	PGSB	exon	.	ID=SECCE7Rv1G0467180.1.exon.1;Parent=SECCE7Rv1G0467180.1	SECCE7Rv1G0467180.1	0	absent	Chromosome	lo7-cs_q30_rye_filter	SECCE7Rv1G0467180.1	Coverage	0
chr7R	84178252	84178576	.	+	PGSB	exon	.	ID=SECCE7Rv1G0467190.1.exon.1;Parent=SECCE7Rv1G0467190.1	SECCE7Rv1G0467190.1	0	absent	Chromosome	lo7-cs_q30_rye_filter	SECCE7Rv1G0467190.1	Coverage	0
chr7R	84979263	84980562	.	-	PGSB	exon	.	ID=SECCE7Rv1G0467200.1.exon.1;Parent=SECCE7Rv1G0467200.1	SECCE7Rv1G0467200.1	842	present	Chromosome	lo7-cs_q30_rye_filter	SECCE7Rv1G0467200.1	Coverage	64.8191
chr7R	84992683	84992884	.	-	PGSB	exon	.	ID=SECCE7Rv1G0467210.1.exon.1;Parent=SECCE7Rv1G0467210.1	SECCE7Rv1G0467210.1	0	absent	Chromosome	lo7-cs_q30_rye_filter	SECCE7Rv1G0467210.1	Coverage	0
chr7R	85272737	85272752	.	-	PGSB	exon	.	ID=SECCE7Rv1G0467220.1.exon.1;Parent=SECCE7Rv1G0467220.1	SECCE7Rv1G0467220.1	192	present	Chromosome	lo7-cs_q30_rye_filter	SECCE7Rv1G0467220.1	Coverage	100
chr7R	85292024	85292150	.	+	PGSB	exon	.	ID=SECCE7Rv1G0467230.1.exon.1;Parent=SECCE7Rv1G0467230.1	SECCE7Rv1G0467230.1	279	present	Chromosome	lo7-cs_q30_rye_filter	SECCE7Rv1G0467230.1	Coverage	100
chr7R	85624808	85625090	.	+	PGSB	exon	.	ID=SECCE7Rv1G0467240.1.exon.1;Parent=SECCE7Rv1G0467240.1	SECCE7Rv1G0467240.1	282	present	Chromosome	lo7-cs_q30_rye_filter	SECCE7Rv1G0467240.1	Coverage	100
chr7R	85749837	85750029	.	+	PGSB	exon	.	ID=SECCE7Rv1G0467250.1.exon.1;Parent=SECCE7Rv1G0467250.1	SECCE7Rv1G0467250.1	916	present	Chromosome	lo7-cs_q30_rye_filter	SECCE7Rv1G0467250.1	Coverage	58.3811
chr7R	86090366	86090744	.	-	PGSB	exon	.	ID=SECCE7Rv1G0467260.1.exon.1;Parent=SECCE7Rv1G0467260.1	SECCE7Rv1G0467260.1	996	present	Chromosome	lo7-cs_q30_rye_filter	SECCE7Rv1G0467260.1	Coverage	100
chr7R	86104317	86104638	.	-	PGSB	exon	.	ID=SECCE7Rv1G0467270.1.exon.1;Parent=SECCE7Rv1G0467270.1	SECCE7Rv1G0467270.1	147	present	Chromosome	lo7-cs_q30_rye_filter	SECCE7Rv1G0467270.1	Coverage	45.7944
chr7R	86220490	86220790	.	-	PGSB	exon	.	ID=SECCE7Rv1G0467280.1.exon.1;Parent=SECCE7Rv1G0467280.1	SECCE7Rv1G0467280.1	300	present	Chromosome	lo7-cs_q30_rye_filter	SECCE7Rv1G0467280.1	Coverage	100
chr7R	86356026	86357007	.	+	PGSB	exon	.	ID=SECCE7Rv1G0467290.1.exon.1;Parent=SECCE7Rv1G0467290.1	SECCE7Rv1G0467290.1	981	present	Chromosome	lo7-cs_q30_rye_filter	SECCE7Rv1G0467290.1	Coverage	100
chr7R	86415369	86415918	.	+	PGSB	exon	.	ID=SECCE7Rv1G0467300.1.exon.1;Parent=SECCE7Rv1G0467300.1	SECCE7Rv1G0467300.1	0	absent	Chromosome	lo7-cs_q30_rye_filter	SECCE7Rv1G0467300.1	Coverage	0
chr7R	86478604	86478665	.	+	PGSB	exon	.	ID=SECCE7Rv1G0467310.1.exon.1;Parent=SECCE7Rv1G0467310.1	SECCE7Rv1G0467310.1	1263	present	Chromosome	lo7-cs_q30_rye_filter	SECCE7Rv1G0467310.1	Coverage	100
chr7R	86481855	86481980	.	-	PGSB	exon	.	ID=SECCE7Rv1G0467320.1.exon.1;Parent=SECCE7Rv1G0467320.1	SECCE7Rv1G0467320.1	577	present	Chromosome	lo7-cs_q30_rye_filter	SECCE7Rv1G0467320.1	Coverage	46.4573
chr7R	86651850	86652204	.	-	PGSB	exon	.	ID=SECCE7Rv1G0467330.1.exon.1;Parent=SECCE7Rv1G0467330.1	SECCE7Rv1G0467330.1	0	absent	Chromosome	lo7-cs_q30_rye_filter	SECCE7Rv1G0467330.1	Coverage	0
chr7R	86708129	86708501	.	+	PGSB	exon	.	ID=SECCE7Rv1G0467340.1.exon.1;Parent=SECCE7Rv1G0467340.1	SECCE7Rv1G0467340.1	346	present	Chromosome	lo7-cs_q30_rye_filter	SECCE7Rv1G0467340.1	Coverage	93.0108
chr7R	86834333	86834357	.	+	PGSB	exon	.	ID=SECCE7Rv1G0467350.1.exon.1;Parent=SECCE7Rv1G0467350.1	SECCE7Rv1G0467350.1	360	present	Chromosome	lo7-cs_q30_rye_filter	SECCE7Rv1G0467350.1	Coverage	100
chr7R	87198810	87199077	.	+	PGSB	exon	.	ID=SECCE7Rv1G0467360.1.exon.1;Parent=SECCE7Rv1G0467360.1	SECCE7Rv1G0467360.1	495	present	Chromosome	lo7-cs_q30_rye_filter	SECCE7Rv1G0467360.1	Coverage	39.1924
chr7R	87205872	87206424	.	-	PGSB	exon	.	ID=SECCE7Rv1G0467370.1.exon.1;Parent=SECCE7Rv1G0467370.1	SECCE7Rv1G0467370.1	1069	present	Chromosome	lo7-cs_q30_rye_filter	SECCE7Rv1G0467370.1	Coverage	81.5408
chr7R	87272060	87272609	.	-	PGSB	exon	.	ID=SECCE7Rv1G0467380.1.exon.1;Parent=SECCE7Rv1G0467380.1	SECCE7Rv1G0467380.1	1245	present	Chromosome	lo7-cs_q30_rye_filter	SECCE7Rv1G0467380.1	Coverage	96.5116
chr7R	87276949	87278455	.	-	PGSB	exon	.	ID=SECCE7Rv1G0467390.1.exon.1;Parent=SECCE7Rv1G0467390.1	SECCE7Rv1G0467390.1	1262	present	Chromosome	lo7-cs_q30_rye_filter	SECCE7Rv1G0467390.1	Coverage	83.7981
chr7R	87405274	87405616	.	+	PGSB	exon	.	ID=SECCE7Rv1G0467400.1.exon.1;Parent=SECCE7Rv1G0467400.1	SECCE7Rv1G0467400.1	549	present	Chromosome	lo7-cs_q30_rye_filter	SECCE7Rv1G0467400.1	Coverage	100
chr7R	87410047	87411265	.	-	PGSB	exon	.	ID=SECCE7Rv1G0467410.1.exon.1;Parent=SECCE7Rv1G0467410.1	SECCE7Rv1G0467410.1	1335	present	Chromosome	lo7-cs_q30_rye_filter	SECCE7Rv1G0467410.1	Coverage	100
chr7R	87511894	87512160	.	-	PGSB	exon	.	ID=SECCE7Rv1G0467420.1.exon.1;Parent=SECCE7Rv1G0467420.1	SECCE7Rv1G0467420.1	0	absent	Chromosome	lo7-cs_q30_rye_filter	SECCE7Rv1G0467420.1	Coverage	0
chr7R	87746139	87746251	.	+	PGSB	exon	.	ID=SECCE7Rv1G0467430.1.exon.1;Parent=SECCE7Rv1G0467430.1	SECCE7Rv1G0467430.1	528	present	Chromosome	lo7-cs_q30_rye_filter	SECCE7Rv1G0467430.1	Coverage	100
chr7R	87748862	87750380	.	-	PGSB	exon	.	ID=SECCE7Rv1G0467440.1.exon.1;Parent=SECCE7Rv1G0467440.1	SECCE7Rv1G0467440.1	1491	present	Chromosome	lo7-cs_q30_rye_filter	SECCE7Rv1G0467440.1	Coverage	98.2213
chr7R	87811124	87811302	.	+	PGSB	exon	.	ID=SECCE7Rv1G0467450.1.exon.1;Parent=SECCE7Rv1G0467450.1	SECCE7Rv1G0467450.1	1391	present	Chromosome	lo7-cs_q30_rye_filter	SECCE7Rv1G0467450.1	Coverage	98.2345
chr7R	87814441	87815008	.	-	PGSB	exon	.	ID=SECCE7Rv1G0467460.1.exon.1;Parent=SECCE7Rv1G0467460.1	SECCE7Rv1G0467460.1	1269	present	Chromosome	lo7-cs_q30_rye_filter	SECCE7Rv1G0467460.1	Coverage	100
chr7R	88001878	88003180	.	+	PGSB	exon	.	ID=SECCE7Rv1G0467470.1.exon.1;Parent=SECCE7Rv1G0467470.1	SECCE7Rv1G0467470.1	1146	present	Chromosome	lo7-cs_q30_rye_filter	SECCE7Rv1G0467470.1	Coverage	88.0184
chr7R	88236489	88236662	.	+	PGSB	exon	.	ID=SECCE7Rv1G0467480.1.exon.1;Parent=SECCE7Rv1G0467480.1	SECCE7Rv1G0467480.1	0	absent	Chromosome	lo7-cs_q30_rye_filter	SECCE7Rv1G0467480.1	Coverage	0
chr7R	88291462	88291539	.	-	PGSB	exon	.	ID=SECCE7Rv1G0467490.1.exon.1;Parent=SECCE7Rv1G0467490.1	SECCE7Rv1G0467490.1	783	present	Chromosome	lo7-cs_q30_rye_filter	SECCE7Rv1G0467490.1	Coverage	65.4135
chr7R	88442450	88443758	.	+	PGSB	exon	.	ID=SECCE7Rv1G0467500.1.exon.1;Parent=SECCE7Rv1G0467500.1	SECCE7Rv1G0467500.1	1213	present	Chromosome	lo7-cs_q30_rye_filter	SECCE7Rv1G0467500.1	Coverage	92.737
chr7R	88464444	88465611	.	-	PGSB	exon	.	ID=SECCE7Rv1G0467510.1.exon.1;Parent=SECCE7Rv1G0467510.1	SECCE7Rv1G0467510.1	396	present	Chromosome	lo7-cs_q30_rye_filter	SECCE7Rv1G0467510.1	Coverage	33.9332
chr7R	88787975	88788052	.	-	PGSB	exon	.	ID=SECCE7Rv1G0467520.1.exon.1;Parent=SECCE7Rv1G0467520.1	SECCE7Rv1G0467520.1	312	present	Chromosome	lo7-cs_q30_rye_filter	SECCE7Rv1G0467520.1	Coverage	26.0652
chr7R	88802607	88802659	.	-	PGSB	exon	.	ID=SECCE7Rv1G0467530.1.exon.1;Parent=SECCE7Rv1G0467530.1	SECCE7Rv1G0467530.1	935	present	Chromosome	lo7-cs_q30_rye_filter	SECCE7Rv1G0467530.1	Coverage	25.5884
chr7R	89065727	89065756	.	-	PGSB	exon	.	ID=SECCE7Rv1G0467540.1.exon.1;Parent=SECCE7Rv1G0467540.1	SECCE7Rv1G0467540.1	475	present	Chromosome	lo7-cs_q30_rye_filter	SECCE7Rv1G0467540.1	Coverage	40.0844
chr7R	89304564	89304593	.	-	PGSB	exon	.	ID=SECCE7Rv1G0467550.1.exon.1;Parent=SECCE7Rv1G0467550.1	SECCE7Rv1G0467550.1	154	present	Chromosome	lo7-cs_q30_rye_filter	SECCE7Rv1G0467550.1	Coverage	12.6749
chr7R	89329451	89329501	.	-	PGSB	exon	.	ID=SECCE7Rv1G0467560.1.exon.1;Parent=SECCE7Rv1G0467560.1	SECCE7Rv1G0467560.1	636	present	Chromosome	lo7-cs_q30_rye_filter	SECCE7Rv1G0467560.1	Coverage	77.3723
chr7R	89335226	89335305	.	-	PGSB	exon	.	ID=SECCE7Rv1G0467570.1.exon.1;Parent=SECCE7Rv1G0467570.1	SECCE7Rv1G0467570.1	79	present	Chromosome	lo7-cs_q30_rye_filter	SECCE7Rv1G0467570.1	Coverage	23.3038
chr7R	89343429	89343768	.	+	PGSB	exon	.	ID=SECCE7Rv1G0467580.1.exon.1;Parent=SECCE7Rv1G0467580.1	SECCE7Rv1G0467580.1	144	present	Chromosome	lo7-cs_q30_rye_filter	SECCE7Rv1G0467580.1	Coverage	42.4779
chr7R	89404342	89404472	.	+	PGSB	exon	.	ID=SECCE7Rv1G0467590.1.exon.1;Parent=SECCE7Rv1G0467590.1	SECCE7Rv1G0467590.1	0	absent	Chromosome	lo7-cs_q30_rye_filter	SECCE7Rv1G0467590.1	Coverage	0
chr7R	89413667	89413941	.	+	PGSB	exon	.	ID=SECCE7Rv1G0467600.1.exon.1;Parent=SECCE7Rv1G0467600.1	SECCE7Rv1G0467600.1	1359	present	Chromosome	lo7-cs_q30_rye_filter	SECCE7Rv1G0467600.1	Coverage	100
chr7R	89444908	89446522	.	+	PGSB	exon	.	ID=SECCE7Rv1G0467610.1.exon.1;Parent=SECCE7Rv1G0467610.1	SECCE7Rv1G0467610.1	0	absent	Chromosome	lo7-cs_q30_rye_filter	SECCE7Rv1G0467610.1	Coverage	0
chr7R	89447908	89448247	.	+	PGSB	exon	.	ID=SECCE7Rv1G0467620.1.exon.1;Parent=SECCE7Rv1G0467620.1	SECCE7Rv1G0467620.1	1555	present	Chromosome	lo7-cs_q30_rye_filter	SECCE7Rv1G0467620.1	Coverage	94.2424
chr7R	89458713	89460357	.	+	PGSB	exon	.	ID=SECCE7Rv1G0467630.1.exon.1;Parent=SECCE7Rv1G0467630.1	SECCE7Rv1G0467630.1	1447	present	Chromosome	lo7-cs_q30_rye_filter	SECCE7Rv1G0467630.1	Coverage	88.017
chr7R	89461677	89461764	.	-	PGSB	exon	.	ID=SECCE7Rv1G0467640.1.exon.1;Parent=SECCE7Rv1G0467640.1	SECCE7Rv1G0467640.1	1266	present	Chromosome	lo7-cs_q30_rye_filter	SECCE7Rv1G0467640.1	Coverage	100
chr7R	89465759	89465954	.	-	PGSB	exon	.	ID=SECCE7Rv1G0467650.1.exon.1;Parent=SECCE7Rv1G0467650.1	SECCE7Rv1G0467650.1	0	absent	Chromosome	lo7-cs_q30_rye_filter	SECCE7Rv1G0467650.1	Coverage	0
chr7R	89742671	89746461	.	-	PGSB	exon	.	ID=SECCE7Rv1G0467660.1.exon.1;Parent=SECCE7Rv1G0467660.1	SECCE7Rv1G0467660.1	3701	present	Chromosome	lo7-cs_q30_rye_filter	SECCE7Rv1G0467660.1	Coverage	96.2298
chr7R	89935319	89936168	.	-	PGSB	exon	.	ID=SECCE7Rv1G0467670.1.exon.1;Parent=SECCE7Rv1G0467670.1	SECCE7Rv1G0467670.1	0	absent	Chromosome	lo7-cs_q30_rye_filter	SECCE7Rv1G0467670.1	Coverage	0
chr7R	89960231	89960885	.	+	PGSB	exon	.	ID=SECCE7Rv1G0467680.1.exon.1;Parent=SECCE7Rv1G0467680.1	SECCE7Rv1G0467680.1	617	present	Chromosome	lo7-cs_q30_rye_filter	SECCE7Rv1G0467680.1	Coverage	94.3425
chr7R	90373990	90374150	.	-	PGSB	exon	.	ID=SECCE7Rv1G0467690.1.exon.1;Parent=SECCE7Rv1G0467690.1	SECCE7Rv1G0467690.1	0	absent	Chromosome	lo7-cs_q30_rye_filter	SECCE7Rv1G0467690.1	Coverage	0
chr7R	90565696	90565999	.	+	PGSB	exon	.	ID=SECCE7Rv1G0467700.1.exon.1;Parent=SECCE7Rv1G0467700.1	SECCE7Rv1G0467700.1	605	present	Chromosome	lo7-cs_q30_rye_filter	SECCE7Rv1G0467700.1	Coverage	71.513
chr7R	90567603	90567726	.	-	PGSB	exon	.	ID=SECCE7Rv1G0467710.1.exon.1;Parent=SECCE7Rv1G0467710.1	SECCE7Rv1G0467710.1	322	present	Chromosome	lo7-cs_q30_rye_filter	SECCE7Rv1G0467710.1	Coverage	41.9271
chr7R	90708267	90708580	.	+	PGSB	exon	.	ID=SECCE7Rv1G0467720.1.exon.1;Parent=SECCE7Rv1G0467720.1	SECCE7Rv1G0467720.1	725	present	Chromosome	lo7-cs_q30_rye_filter	SECCE7Rv1G0467720.1	Coverage	48.7231
chr7R	90710235	90710775	.	-	PGSB	exon	.	ID=SECCE7Rv1G0467730.1.exon.1;Parent=SECCE7Rv1G0467730.1	SECCE7Rv1G0467730.1	1034	present	Chromosome	lo7-cs_q30_rye_filter	SECCE7Rv1G0467730.1	Coverage	73.9628
chr7R	90719884	90721135	.	-	PGSB	exon	.	ID=SECCE7Rv1G0467740.1.exon.1;Parent=SECCE7Rv1G0467740.1	SECCE7Rv1G0467740.1	1246	present	Chromosome	lo7-cs_q30_rye_filter	SECCE7Rv1G0467740.1	Coverage	99.362
chr7R	90879163	90879256	.	+	PGSB	exon	.	ID=SECCE7Rv1G0467750.1.exon.1;Parent=SECCE7Rv1G0467750.1	SECCE7Rv1G0467750.1	290	present	Chromosome	lo7-cs_q30_rye_filter	SECCE7Rv1G0467750.1	Coverage	30.7856
chr7R	90884054	90884271	.	-	PGSB	exon	.	ID=SECCE7Rv1G0467760.1.exon.1;Parent=SECCE7Rv1G0467760.1	SECCE7Rv1G0467760.1	198	present	Chromosome	lo7-cs_q30_rye_filter	SECCE7Rv1G0467760.1	Coverage	10.7843
chr7R	90944619	90944934	.	+	PGSB	exon	.	ID=SECCE7Rv1G0467770.1.exon.1;Parent=SECCE7Rv1G0467770.1	SECCE7Rv1G0467770.1	0	absent	Chromosome	lo7-cs_q30_rye_filter	SECCE7Rv1G0467770.1	Coverage	0
chr7R	91169024	91170194	.	-	PGSB	exon	.	ID=SECCE7Rv1G0467780.1.exon.1;Parent=SECCE7Rv1G0467780.1	SECCE7Rv1G0467780.1	1170	present	Chromosome	lo7-cs_q30_rye_filter	SECCE7Rv1G0467780.1	Coverage	100
chr7R	91572893	91573832	.	+	PGSB	exon	.	ID=SECCE7Rv1G0467790.1.exon.1;Parent=SECCE7Rv1G0467790.1	SECCE7Rv1G0467790.1	0	absent	Chromosome	lo7-cs_q30_rye_filter	SECCE7Rv1G0467790.1	Coverage	0
chr7R	91582240	91582765	.	-	PGSB	exon	.	ID=SECCE7Rv1G0467800.1.exon.1;Parent=SECCE7Rv1G0467800.1	SECCE7Rv1G0467800.1	867	present	Chromosome	lo7-cs_q30_rye_filter	SECCE7Rv1G0467800.1	Coverage	78.1081
chr7R	91588811	91589069	.	-	PGSB	exon	.	ID=SECCE7Rv1G0467810.1.exon.1;Parent=SECCE7Rv1G0467810.1	SECCE7Rv1G0467810.1	540	present	Chromosome	lo7-cs_q30_rye_filter	SECCE7Rv1G0467810.1	Coverage	55.0459
chr7R	91733830	91734553	.	-	PGSB	exon	.	ID=SECCE7Rv1G0467820.1.exon.1;Parent=SECCE7Rv1G0467820.1	SECCE7Rv1G0467820.1	1506	present	Chromosome	lo7-cs_q30_rye_filter	SECCE7Rv1G0467820.1	Coverage	72.5434
chr7R	91747359	91747805	.	+	PGSB	exon	.	ID=SECCE7Rv1G0467830.1.exon.1;Parent=SECCE7Rv1G0467830.1	SECCE7Rv1G0467830.1	1725	present	Chromosome	lo7-cs_q30_rye_filter	SECCE7Rv1G0467830.1	Coverage	93.6482
chr7R	92129120	92130285	.	+	PGSB	exon	.	ID=SECCE7Rv1G0467840.1.exon.1;Parent=SECCE7Rv1G0467840.1	SECCE7Rv1G0467840.1	1165	present	Chromosome	lo7-cs_q30_rye_filter	SECCE7Rv1G0467840.1	Coverage	100
chr7R	92134875	92136025	.	+	PGSB	exon	.	ID=SECCE7Rv1G0467850.1.exon.1;Parent=SECCE7Rv1G0467850.1	SECCE7Rv1G0467850.1	1215	present	Chromosome	lo7-cs_q30_rye_filter	SECCE7Rv1G0467850.1	Coverage	100
chr7R	92335182	92336332	.	+	PGSB	exon	.	ID=SECCE7Rv1G0467860.1.exon.1;Parent=SECCE7Rv1G0467860.1	SECCE7Rv1G0467860.1	1205	present	Chromosome	lo7-cs_q30_rye_filter	SECCE7Rv1G0467860.1	Coverage	99.177
chr7R	92343597	92343632	.	-	PGSB	exon	.	ID=SECCE7Rv1G0467870.1.exon.1;Parent=SECCE7Rv1G0467870.1	SECCE7Rv1G0467870.1	899	present	Chromosome	lo7-cs_q30_rye_filter	SECCE7Rv1G0467870.1	Coverage	76.4456
chr7R	92350662	92350974	.	-	PGSB	exon	.	ID=SECCE7Rv1G0467880.1.exon.1;Parent=SECCE7Rv1G0467880.1	SECCE7Rv1G0467880.1	253	present	Chromosome	lo7-cs_q30_rye_filter	SECCE7Rv1G0467880.1	Coverage	81.0897
chr7R	92433641	92433682	.	-	PGSB	exon	.	ID=SECCE7Rv1G0467890.1.exon.1;Parent=SECCE7Rv1G0467890.1	SECCE7Rv1G0467890.1	791	present	Chromosome	lo7-cs_q30_rye_filter	SECCE7Rv1G0467890.1	Coverage	65.7523
chr7R	92805808	92805972	.	-	PGSB	exon	.	ID=SECCE7Rv1G0467900.1.exon.1;Parent=SECCE7Rv1G0467900.1	SECCE7Rv1G0467900.1	485	present	Chromosome	lo7-cs_q30_rye_filter	SECCE7Rv1G0467900.1	Coverage	82.906
chr7R	93091343	93091970	.	+	PGSB	exon	.	ID=SECCE7Rv1G0467910.1.exon.1;Parent=SECCE7Rv1G0467910.1	SECCE7Rv1G0467910.1	1509	present	Chromosome	lo7-cs_q30_rye_filter	SECCE7Rv1G0467910.1	Coverage	100
chr7R	93093540	93093854	.	-	PGSB	exon	.	ID=SECCE7Rv1G0467920.1.exon.1;Parent=SECCE7Rv1G0467920.1	SECCE7Rv1G0467920.1	921	present	Chromosome	lo7-cs_q30_rye_filter	SECCE7Rv1G0467920.1	Coverage	100
chr7R	93626951	93627077	.	+	PGSB	exon	.	ID=SECCE7Rv1G0467930.1.exon.1;Parent=SECCE7Rv1G0467930.1	SECCE7Rv1G0467930.1	954	present	Chromosome	lo7-cs_q30_rye_filter	SECCE7Rv1G0467930.1	Coverage	100
chr7R	93639404	93639530	.	+	PGSB	exon	.	ID=SECCE7Rv1G0467940.1.exon.1;Parent=SECCE7Rv1G0467940.1	SECCE7Rv1G0467940.1	522	present	Chromosome	lo7-cs_q30_rye_filter	SECCE7Rv1G0467940.1	Coverage	55.5911
chr7R	93645263	93645410	.	-	PGSB	exon	.	ID=SECCE7Rv1G0467950.1.exon.1;Parent=SECCE7Rv1G0467950.1	SECCE7Rv1G0467950.1	303	present	Chromosome	lo7-cs_q30_rye_filter	SECCE7Rv1G0467950.1	Coverage	45.2915
chr7R	93742753	93743596	.	+	PGSB	exon	.	ID=SECCE7Rv1G0467960.1.exon.1;Parent=SECCE7Rv1G0467960.1	SECCE7Rv1G0467960.1	186	present	Chromosome	lo7-cs_q30_rye_filter	SECCE7Rv1G0467960.1	Coverage	22.0641
chr7R	93822976	93825415	.	+	PGSB	exon	.	ID=SECCE7Rv1G0467970.1.exon.1;Parent=SECCE7Rv1G0467970.1	SECCE7Rv1G0467970.1	4245	present	Chromosome	lo7-cs_q30_rye_filter	SECCE7Rv1G0467970.1	Coverage	89.6705
chr7R	94012030	94012669	.	+	PGSB	exon	.	ID=SECCE7Rv1G0467980.1.exon.1;Parent=SECCE7Rv1G0467980.1	SECCE7Rv1G0467980.1	639	present	Chromosome	lo7-cs_q30_rye_filter	SECCE7Rv1G0467980.1	Coverage	100
chr7R	94306316	94306376	.	+	PGSB	exon	.	ID=SECCE7Rv1G0467990.1.exon.1;Parent=SECCE7Rv1G0467990.1	SECCE7Rv1G0467990.1	444	present	Chromosome	lo7-cs_q30_rye_filter	SECCE7Rv1G0467990.1	Coverage	100
chr7R	94490212	94490398	.	+	PGSB	exon	.	ID=SECCE7Rv1G0468000.1.exon.1;Parent=SECCE7Rv1G0468000.1	SECCE7Rv1G0468000.1	2547	present	Chromosome	lo7-cs_q30_rye_filter	SECCE7Rv1G0468000.1	Coverage	100
chr7R	94518038	94518165	.	-	PGSB	exon	.	ID=SECCE7Rv1G0468010.1.exon.1;Parent=SECCE7Rv1G0468010.1	SECCE7Rv1G0468010.1	261	present	Chromosome	lo7-cs_q30_rye_filter	SECCE7Rv1G0468010.1	Coverage	100
chr7R	94838804	94839895	.	+	PGSB	exon	.	ID=SECCE7Rv1G0468020.1.exon.1;Parent=SECCE7Rv1G0468020.1	SECCE7Rv1G0468020.1	0	absent	Chromosome	lo7-cs_q30_rye_filter	SECCE7Rv1G0468020.1	Coverage	0
chr7R	94842658	94842662	.	-	PGSB	exon	.	ID=SECCE7Rv1G0468030.1.exon.1;Parent=SECCE7Rv1G0468030.1	SECCE7Rv1G0468030.1	2854	present	Chromosome	lo7-cs_q30_rye_filter	SECCE7Rv1G0468030.1	Coverage	95.1333
chr7R	95105835	95107785	.	+	PGSB	exon	.	ID=SECCE7Rv1G0468040.1.exon.1;Parent=SECCE7Rv1G0468040.1	SECCE7Rv1G0468040.1	1950	present	Chromosome	lo7-cs_q30_rye_filter	SECCE7Rv1G0468040.1	Coverage	100
chr7R	95109799	95110093	.	+	PGSB	exon	.	ID=SECCE7Rv1G0468050.1.exon.1;Parent=SECCE7Rv1G0468050.1	SECCE7Rv1G0468050.1	2934	present	Chromosome	lo7-cs_q30_rye_filter	SECCE7Rv1G0468050.1	Coverage	100
chr7R	95244983	95245076	.	+	PGSB	exon	.	ID=SECCE7Rv1G0468060.1.exon.1;Parent=SECCE7Rv1G0468060.1	SECCE7Rv1G0468060.1	193	present	Chromosome	lo7-cs_q30_rye_filter	SECCE7Rv1G0468060.1	Coverage	37.8431
chr7R	95248884	95249085	.	-	PGSB	exon	.	ID=SECCE7Rv1G0468070.1.exon.1;Parent=SECCE7Rv1G0468070.1	SECCE7Rv1G0468070.1	357	present	Chromosome	lo7-cs_q30_rye_filter	SECCE7Rv1G0468070.1	Coverage	37.0717
chr7R	95253857	95254041	.	+	PGSB	exon	.	ID=SECCE7Rv1G0468080.1.exon.1;Parent=SECCE7Rv1G0468080.1	SECCE7Rv1G0468080.1	1091	present	Chromosome	lo7-cs_q30_rye_filter	SECCE7Rv1G0468080.1	Coverage	99.0917
chr7R	95257342	95259820	.	-	PGSB	exon	.	ID=SECCE7Rv1G0468090.1.exon.1;Parent=SECCE7Rv1G0468090.1	SECCE7Rv1G0468090.1	2478	present	Chromosome	lo7-cs_q30_rye_filter	SECCE7Rv1G0468090.1	Coverage	100
chr7R	95395394	95396432	.	-	PGSB	exon	.	ID=SECCE7Rv1G0468100.1.exon.1;Parent=SECCE7Rv1G0468100.1	SECCE7Rv1G0468100.1	1038	present	Chromosome	lo7-cs_q30_rye_filter	SECCE7Rv1G0468100.1	Coverage	100
chr7R	95433075	95433291	.	+	PGSB	exon	.	ID=SECCE7Rv1G0468110.1.exon.1;Parent=SECCE7Rv1G0468110.1	SECCE7Rv1G0468110.1	48	present	Chromosome	lo7-cs_q30_rye_filter	SECCE7Rv1G0468110.1	Coverage	22.2222
chr7R	95435166	95435914	.	+	PGSB	exon	.	ID=SECCE7Rv1G0468120.1.exon.1;Parent=SECCE7Rv1G0468120.1	SECCE7Rv1G0468120.1	2056	present	Chromosome	lo7-cs_q30_rye_filter	SECCE7Rv1G0468120.1	Coverage	85.8814
chr7R	95439182	95439572	.	-	PGSB	exon	.	ID=SECCE7Rv1G0468130.1.exon.1;Parent=SECCE7Rv1G0468130.1	SECCE7Rv1G0468130.1	1422	present	Chromosome	lo7-cs_q30_rye_filter	SECCE7Rv1G0468130.1	Coverage	100
chr7R	95444635	95445757	.	+	PGSB	exon	.	ID=SECCE7Rv1G0468140.1.exon.1;Parent=SECCE7Rv1G0468140.1	SECCE7Rv1G0468140.1	1122	present	Chromosome	lo7-cs_q30_rye_filter	SECCE7Rv1G0468140.1	Coverage	100
chr7R	95449293	95449593	.	+	PGSB	exon	.	ID=SECCE7Rv1G0468150.1.exon.1;Parent=SECCE7Rv1G0468150.1	SECCE7Rv1G0468150.1	189	present	Chromosome	lo7-cs_q30_rye_filter	SECCE7Rv1G0468150.1	Coverage	7.15096
chr7R	95454598	95454844	.	+	PGSB	exon	.	ID=SECCE7Rv1G0468160.1.exon.1;Parent=SECCE7Rv1G0468160.1	SECCE7Rv1G0468160.1	246	present	Chromosome	lo7-cs_q30_rye_filter	SECCE7Rv1G0468160.1	Coverage	100
chr7R	95457738	95457969	.	-	PGSB	exon	.	ID=SECCE7Rv1G0468170.1.exon.1;Parent=SECCE7Rv1G0468170.1	SECCE7Rv1G0468170.1	231	present	Chromosome	lo7-cs_q30_rye_filter	SECCE7Rv1G0468170.1	Coverage	100
chr7R	95601836	95602082	.	+	PGSB	exon	.	ID=SECCE7Rv1G0468180.1.exon.1;Parent=SECCE7Rv1G0468180.1	SECCE7Rv1G0468180.1	246	present	Chromosome	lo7-cs_q30_rye_filter	SECCE7Rv1G0468180.1	Coverage	100
chr7R	95632082	95632304	.	+	PGSB	exon	.	ID=SECCE7Rv1G0468190.1.exon.1;Parent=SECCE7Rv1G0468190.1	SECCE7Rv1G0468190.1	0	absent	Chromosome	lo7-cs_q30_rye_filter	SECCE7Rv1G0468190.1	Coverage	0
chr7R	95679450	95680340	.	-	PGSB	exon	.	ID=SECCE7Rv1G0468200.1.exon.1;Parent=SECCE7Rv1G0468200.1	SECCE7Rv1G0468200.1	0	absent	Chromosome	lo7-cs_q30_rye_filter	SECCE7Rv1G0468200.1	Coverage	0
chr7R	95692292	95692514	.	+	PGSB	exon	.	ID=SECCE7Rv1G0468210.1.exon.1;Parent=SECCE7Rv1G0468210.1	SECCE7Rv1G0468210.1	0	absent	Chromosome	lo7-cs_q30_rye_filter	SECCE7Rv1G0468210.1	Coverage	0
chr7R	95696416	95696638	.	+	PGSB	exon	.	ID=SECCE7Rv1G0468220.1.exon.1;Parent=SECCE7Rv1G0468220.1	SECCE7Rv1G0468220.1	0	absent	Chromosome	lo7-cs_q30_rye_filter	SECCE7Rv1G0468220.1	Coverage	0
chr7R	95752143	95752365	.	+	PGSB	exon	.	ID=SECCE7Rv1G0468230.1.exon.1;Parent=SECCE7Rv1G0468230.1	SECCE7Rv1G0468230.1	222	present	Chromosome	lo7-cs_q30_rye_filter	SECCE7Rv1G0468230.1	Coverage	100
chr7R	95756892	95757037	.	-	PGSB	exon	.	ID=SECCE7Rv1G0468240.1.exon.1;Parent=SECCE7Rv1G0468240.1	SECCE7Rv1G0468240.1	0	absent	Chromosome	lo7-cs_q30_rye_filter	SECCE7Rv1G0468240.1	Coverage	0
chr7R	95762239	95762461	.	+	PGSB	exon	.	ID=SECCE7Rv1G0468250.1.exon.1;Parent=SECCE7Rv1G0468250.1	SECCE7Rv1G0468250.1	222	present	Chromosome	lo7-cs_q30_rye_filter	SECCE7Rv1G0468250.1	Coverage	100
chr7R	95765428	95765650	.	+	PGSB	exon	.	ID=SECCE7Rv1G0468260.1.exon.1;Parent=SECCE7Rv1G0468260.1	SECCE7Rv1G0468260.1	222	present	Chromosome	lo7-cs_q30_rye_filter	SECCE7Rv1G0468260.1	Coverage	100
chr7R	95770138	95770283	.	-	PGSB	exon	.	ID=SECCE7Rv1G0468270.1.exon.1;Parent=SECCE7Rv1G0468270.1	SECCE7Rv1G0468270.1	0	absent	Chromosome	lo7-cs_q30_rye_filter	SECCE7Rv1G0468270.1	Coverage	0
chr7R	95866730	95867192	.	-	PGSB	exon	.	ID=SECCE7Rv1G0468280.1.exon.1;Parent=SECCE7Rv1G0468280.1	SECCE7Rv1G0468280.1	0	absent	Chromosome	lo7-cs_q30_rye_filter	SECCE7Rv1G0468280.1	Coverage	0
chr7R	96143922	96144150	.	+	PGSB	exon	.	ID=SECCE7Rv1G0468290.1.exon.1;Parent=SECCE7Rv1G0468290.1	SECCE7Rv1G0468290.1	228	present	Chromosome	lo7-cs_q30_rye_filter	SECCE7Rv1G0468290.1	Coverage	100
chr7R	96147340	96149713	.	-	PGSB	exon	.	ID=SECCE7Rv1G0468300.1.exon.1;Parent=SECCE7Rv1G0468300.1	SECCE7Rv1G0468300.1	1089	present	Chromosome	lo7-cs_q30_rye_filter	SECCE7Rv1G0468300.1	Coverage	45.8913
chr7R	96151799	96151835	.	-	PGSB	exon	.	ID=SECCE7Rv1G0468310.1.exon.1;Parent=SECCE7Rv1G0468310.1	SECCE7Rv1G0468310.1	924	present	Chromosome	lo7-cs_q30_rye_filter	SECCE7Rv1G0468310.1	Coverage	55.6962
chr7R	96409797	96410331	.	+	PGSB	exon	.	ID=SECCE7Rv1G0468320.1.exon.1;Parent=SECCE7Rv1G0468320.1	SECCE7Rv1G0468320.1	0	absent	Chromosome	lo7-cs_q30_rye_filter	SECCE7Rv1G0468320.1	Coverage	0
chr7R	96426704	96427523	.	-	PGSB	exon	.	ID=SECCE7Rv1G0468330.1.exon.1;Parent=SECCE7Rv1G0468330.1	SECCE7Rv1G0468330.1	939	present	Chromosome	lo7-cs_q30_rye_filter	SECCE7Rv1G0468330.1	Coverage	61.3725
chr7R	96717744	96718050	.	-	PGSB	exon	.	ID=SECCE7Rv1G0468340.1.exon.1;Parent=SECCE7Rv1G0468340.1	SECCE7Rv1G0468340.1	1050	present	Chromosome	lo7-cs_q30_rye_filter	SECCE7Rv1G0468340.1	Coverage	100
chr7R	96889189	96889552	.	+	PGSB	exon	.	ID=SECCE7Rv1G0468350.1.exon.1;Parent=SECCE7Rv1G0468350.1	SECCE7Rv1G0468350.1	768	present	Chromosome	lo7-cs_q30_rye_filter	SECCE7Rv1G0468350.1	Coverage	81.2698
chr7R	97006451	97006643	.	+	PGSB	exon	.	ID=SECCE7Rv1G0468360.1.exon.1;Parent=SECCE7Rv1G0468360.1	SECCE7Rv1G0468360.1	192	present	Chromosome	lo7-cs_q30_rye_filter	SECCE7Rv1G0468360.1	Coverage	100
chr7R	97108762	97109113	.	+	PGSB	exon	.	ID=SECCE7Rv1G0468370.1.exon.1;Parent=SECCE7Rv1G0468370.1	SECCE7Rv1G0468370.1	0	absent	Chromosome	lo7-cs_q30_rye_filter	SECCE7Rv1G0468370.1	Coverage	0
chr7R	97159919	97160138	.	-	PGSB	exon	.	ID=SECCE7Rv1G0468380.1.exon.1;Parent=SECCE7Rv1G0468380.1	SECCE7Rv1G0468380.1	1196	present	Chromosome	lo7-cs_q30_rye_filter	SECCE7Rv1G0468380.1	Coverage	95.1472
chr7R	97477567	97478281	.	-	PGSB	exon	.	ID=SECCE7Rv1G0468390.1.exon.1;Parent=SECCE7Rv1G0468390.1	SECCE7Rv1G0468390.1	999	present	Chromosome	lo7-cs_q30_rye_filter	SECCE7Rv1G0468390.1	Coverage	97.3684
chr7R	97483231	97483292	.	-	PGSB	exon	.	ID=SECCE7Rv1G0468400.1.exon.1;Parent=SECCE7Rv1G0468400.1	SECCE7Rv1G0468400.1	343	present	Chromosome	lo7-cs_q30_rye_filter	SECCE7Rv1G0468400.1	Coverage	57.4539
chr7R	97717787	97718152	.	+	PGSB	exon	.	ID=SECCE7Rv1G0468410.1.exon.1;Parent=SECCE7Rv1G0468410.1	SECCE7Rv1G0468410.1	848	present	Chromosome	lo7-cs_q30_rye_filter	SECCE7Rv1G0468410.1	Coverage	72.1088
chr7R	97867232	97867417	.	+	PGSB	exon	.	ID=SECCE7Rv1G0468420.1.exon.1;Parent=SECCE7Rv1G0468420.1	SECCE7Rv1G0468420.1	744	present	Chromosome	lo7-cs_q30_rye_filter	SECCE7Rv1G0468420.1	Coverage	100
chr7R	98024648	98024876	.	+	PGSB	exon	.	ID=SECCE7Rv1G0468430.1.exon.1;Parent=SECCE7Rv1G0468430.1	SECCE7Rv1G0468430.1	0	absent	Chromosome	lo7-cs_q30_rye_filter	SECCE7Rv1G0468430.1	Coverage	0
chr7R	98292517	98292590	.	+	PGSB	exon	.	ID=SECCE7Rv1G0468440.1.exon.1;Parent=SECCE7Rv1G0468440.1	SECCE7Rv1G0468440.1	342	present	Chromosome	lo7-cs_q30_rye_filter	SECCE7Rv1G0468440.1	Coverage	100
chr7R	98299986	98300057	.	-	PGSB	exon	.	ID=SECCE7Rv1G0468450.1.exon.1;Parent=SECCE7Rv1G0468450.1	SECCE7Rv1G0468450.1	666	present	Chromosome	lo7-cs_q30_rye_filter	SECCE7Rv1G0468450.1	Coverage	100
chr7R	98605600	98605926	.	-	PGSB	exon	.	ID=SECCE7Rv1G0468460.1.exon.1;Parent=SECCE7Rv1G0468460.1	SECCE7Rv1G0468460.1	326	present	Chromosome	lo7-cs_q30_rye_filter	SECCE7Rv1G0468460.1	Coverage	100
chr7R	98618528	98618726	.	-	PGSB	exon	.	ID=SECCE7Rv1G0468470.1.exon.1;Parent=SECCE7Rv1G0468470.1	SECCE7Rv1G0468470.1	198	present	Chromosome	lo7-cs_q30_rye_filter	SECCE7Rv1G0468470.1	Coverage	100
chr7R	98620067	98620910	.	-	PGSB	exon	.	ID=SECCE7Rv1G0468480.1.exon.1;Parent=SECCE7Rv1G0468480.1	SECCE7Rv1G0468480.1	811	present	Chromosome	lo7-cs_q30_rye_filter	SECCE7Rv1G0468480.1	Coverage	96.204
chr7R	98969818	98970028	.	+	PGSB	exon	.	ID=SECCE7Rv1G0468490.1.exon.1;Parent=SECCE7Rv1G0468490.1	SECCE7Rv1G0468490.1	210	present	Chromosome	lo7-cs_q30_rye_filter	SECCE7Rv1G0468490.1	Coverage	100
chr7R	99095794	99096928	.	+	PGSB	exon	.	ID=SECCE7Rv1G0468500.1.exon.1;Parent=SECCE7Rv1G0468500.1	SECCE7Rv1G0468500.1	777	present	Chromosome	lo7-cs_q30_rye_filter	SECCE7Rv1G0468500.1	Coverage	68.5185
chr7R	99099949	99100393	.	+	PGSB	exon	.	ID=SECCE7Rv1G0468510.1.exon.1;Parent=SECCE7Rv1G0468510.1	SECCE7Rv1G0468510.1	173	present	Chromosome	lo7-cs_q30_rye_filter	SECCE7Rv1G0468510.1	Coverage	12.6462
chr7R	99122770	99122939	.	+	PGSB	exon	.	ID=SECCE7Rv1G0468520.1.exon.1;Parent=SECCE7Rv1G0468520.1	SECCE7Rv1G0468520.1	369	present	Chromosome	lo7-cs_q30_rye_filter	SECCE7Rv1G0468520.1	Coverage	100
chr7R	99128690	99130487	.	-	PGSB	exon	.	ID=SECCE7Rv1G0468530.1.exon.1;Parent=SECCE7Rv1G0468530.1	SECCE7Rv1G0468530.1	1797	present	Chromosome	lo7-cs_q30_rye_filter	SECCE7Rv1G0468530.1	Coverage	100
chr7R	99336004	99338982	.	+	PGSB	exon	.	ID=SECCE7Rv1G0468540.1.exon.1;Parent=SECCE7Rv1G0468540.1	SECCE7Rv1G0468540.1	5501	present	Chromosome	lo7-cs_q30_rye_filter	SECCE7Rv1G0468540.1	Coverage	78.2949
chr7R	99344402	99344588	.	-	PGSB	exon	.	ID=SECCE7Rv1G0468550.1.exon.1;Parent=SECCE7Rv1G0468550.1	SECCE7Rv1G0468550.1	1481	present	Chromosome	lo7-cs_q30_rye_filter	SECCE7Rv1G0468550.1	Coverage	74.9115
chr7R	99444507	99444996	.	-	PGSB	exon	.	ID=SECCE7Rv1G0468560.1.exon.1;Parent=SECCE7Rv1G0468560.1	SECCE7Rv1G0468560.1	489	present	Chromosome	lo7-cs_q30_rye_filter	SECCE7Rv1G0468560.1	Coverage	100
chr7R	99944349	99944385	.	+	PGSB	exon	.	ID=SECCE7Rv1G0468570.1.exon.1;Parent=SECCE7Rv1G0468570.1	SECCE7Rv1G0468570.1	1761	present	Chromosome	lo7-cs_q30_rye_filter	SECCE7Rv1G0468570.1	Coverage	100
chr7R	100175349	100176123	.	+	PGSB	exon	.	ID=SECCE7Rv1G0468580.1.exon.1;Parent=SECCE7Rv1G0468580.1	SECCE7Rv1G0468580.1	2877	present	Chromosome	lo7-cs_q30_rye_filter	SECCE7Rv1G0468580.1	Coverage	100
chr7R	100180899	100181187	.	+	PGSB	exon	.	ID=SECCE7Rv1G0468590.1.exon.1;Parent=SECCE7Rv1G0468590.1	SECCE7Rv1G0468590.1	288	present	Chromosome	lo7-cs_q30_rye_filter	SECCE7Rv1G0468590.1	Coverage	100
chr7R	100184608	100185187	.	-	PGSB	exon	.	ID=SECCE7Rv1G0468600.1.exon.1;Parent=SECCE7Rv1G0468600.1	SECCE7Rv1G0468600.1	0	absent	Chromosome	lo7-cs_q30_rye_filter	SECCE7Rv1G0468600.1	Coverage	0
chr7R	100872607	100872746	.	-	PGSB	exon	.	ID=SECCE7Rv1G0468610.1.exon.1;Parent=SECCE7Rv1G0468610.1	SECCE7Rv1G0468610.1	3041	present	Chromosome	lo7-cs_q30_rye_filter	SECCE7Rv1G0468610.1	Coverage	99.8686
chr7R	101279104	101279557	.	+	PGSB	exon	.	ID=SECCE7Rv1G0468620.1.exon.1;Parent=SECCE7Rv1G0468620.1	SECCE7Rv1G0468620.1	453	present	Chromosome	lo7-cs_q30_rye_filter	SECCE7Rv1G0468620.1	Coverage	100
chr7R	101626376	101626440	.	+	PGSB	exon	.	ID=SECCE7Rv1G0468630.1.exon.1;Parent=SECCE7Rv1G0468630.1	SECCE7Rv1G0468630.1	240	present	Chromosome	lo7-cs_q30_rye_filter	SECCE7Rv1G0468630.1	Coverage	100
chr7R	102000399	102000529	.	+	PGSB	exon	.	ID=SECCE7Rv1G0468640.1.exon.1;Parent=SECCE7Rv1G0468640.1	SECCE7Rv1G0468640.1	1053	present	Chromosome	lo7-cs_q30_rye_filter	SECCE7Rv1G0468640.1	Coverage	100
chr7R	102435031	102436033	.	-	PGSB	exon	.	ID=SECCE7Rv1G0468650.1.exon.1;Parent=SECCE7Rv1G0468650.1	SECCE7Rv1G0468650.1	1236	present	Chromosome	lo7-cs_q30_rye_filter	SECCE7Rv1G0468650.1	Coverage	99.5169
chr7R	102442767	102443196	.	+	PGSB	exon	.	ID=SECCE7Rv1G0468660.1.exon.1;Parent=SECCE7Rv1G0468660.1	SECCE7Rv1G0468660.1	429	present	Chromosome	lo7-cs_q30_rye_filter	SECCE7Rv1G0468660.1	Coverage	100
chr7R	102450831	102451242	.	-	PGSB	exon	.	ID=SECCE7Rv1G0468670.1.exon.1;Parent=SECCE7Rv1G0468670.1	SECCE7Rv1G0468670.1	354	present	Chromosome	lo7-cs_q30_rye_filter	SECCE7Rv1G0468670.1	Coverage	86.1314
chr7R	102539222	102539423	.	-	PGSB	exon	.	ID=SECCE7Rv1G0468680.1.exon.1;Parent=SECCE7Rv1G0468680.1	SECCE7Rv1G0468680.1	201	present	Chromosome	lo7-cs_q30_rye_filter	SECCE7Rv1G0468680.1	Coverage	100
chr7R	102642315	102642972	.	+	PGSB	exon	.	ID=SECCE7Rv1G0468690.1.exon.1;Parent=SECCE7Rv1G0468690.1	SECCE7Rv1G0468690.1	819	present	Chromosome	lo7-cs_q30_rye_filter	SECCE7Rv1G0468690.1	Coverage	100
chr7R	102885247	102885904	.	+	PGSB	exon	.	ID=SECCE7Rv1G0468700.1.exon.1;Parent=SECCE7Rv1G0468700.1	SECCE7Rv1G0468700.1	855	present	Chromosome	lo7-cs_q30_rye_filter	SECCE7Rv1G0468700.1	Coverage	100
chr7R	102959290	102959632	.	+	PGSB	exon	.	ID=SECCE7Rv1G0468710.1.exon.1;Parent=SECCE7Rv1G0468710.1	SECCE7Rv1G0468710.1	357	present	Chromosome	lo7-cs_q30_rye_filter	SECCE7Rv1G0468710.1	Coverage	100
chr7R	103062317	103062938	.	+	PGSB	exon	.	ID=SECCE7Rv1G0468720.1.exon.1;Parent=SECCE7Rv1G0468720.1	SECCE7Rv1G0468720.1	621	present	Chromosome	lo7-cs_q30_rye_filter	SECCE7Rv1G0468720.1	Coverage	100
chr7R	103068771	103070580	.	-	PGSB	exon	.	ID=SECCE7Rv1G0468730.1.exon.1;Parent=SECCE7Rv1G0468730.1	SECCE7Rv1G0468730.1	144	present	Chromosome	lo7-cs_q30_rye_filter	SECCE7Rv1G0468730.1	Coverage	7.9602
chr7R	103074077	103074369	.	-	PGSB	exon	.	ID=SECCE7Rv1G0468740.1.exon.1;Parent=SECCE7Rv1G0468740.1	SECCE7Rv1G0468740.1	2163	present	Chromosome	lo7-cs_q30_rye_filter	SECCE7Rv1G0468740.1	Coverage	100
chr7R	103078862	103079212	.	-	PGSB	exon	.	ID=SECCE7Rv1G0468750.1.exon.1;Parent=SECCE7Rv1G0468750.1	SECCE7Rv1G0468750.1	1192	present	Chromosome	lo7-cs_q30_rye_filter	SECCE7Rv1G0468750.1	Coverage	86.9438
chr7R	103284907	103285299	.	-	PGSB	exon	.	ID=SECCE7Rv1G0468760.1.exon.1;Parent=SECCE7Rv1G0468760.1	SECCE7Rv1G0468760.1	1176	present	Chromosome	lo7-cs_q30_rye_filter	SECCE7Rv1G0468760.1	Coverage	100
chr7R	103291905	103291995	.	+	PGSB	exon	.	ID=SECCE7Rv1G0468770.1.exon.1;Parent=SECCE7Rv1G0468770.1	SECCE7Rv1G0468770.1	2388	present	Chromosome	lo7-cs_q30_rye_filter	SECCE7Rv1G0468770.1	Coverage	100
chr7R	103296374	103296451	.	+	PGSB	exon	.	ID=SECCE7Rv1G0468780.1.exon.1;Parent=SECCE7Rv1G0468780.1	SECCE7Rv1G0468780.1	408	present	Chromosome	lo7-cs_q30_rye_filter	SECCE7Rv1G0468780.1	Coverage	100
chr7R	103513987	103514515	.	-	PGSB	exon	.	ID=SECCE7Rv1G0468790.1.exon.1;Parent=SECCE7Rv1G0468790.1	SECCE7Rv1G0468790.1	528	present	Chromosome	lo7-cs_q30_rye_filter	SECCE7Rv1G0468790.1	Coverage	100
chr7R	103521446	103522901	.	-	PGSB	exon	.	ID=SECCE7Rv1G0468800.1.exon.1;Parent=SECCE7Rv1G0468800.1	SECCE7Rv1G0468800.1	1429	present	Chromosome	lo7-cs_q30_rye_filter	SECCE7Rv1G0468800.1	Coverage	98.2131
chr7R	103850053	103850116	.	+	PGSB	exon	.	ID=SECCE7Rv1G0468810.1.exon.1;Parent=SECCE7Rv1G0468810.1	SECCE7Rv1G0468810.1	2075	present	Chromosome	lo7-cs_q30_rye_filter	SECCE7Rv1G0468810.1	Coverage	95.0092
chr7R	103858385	103859285	.	+	PGSB	exon	.	ID=SECCE7Rv1G0468820.1.exon.1;Parent=SECCE7Rv1G0468820.1	SECCE7Rv1G0468820.1	304	present	Chromosome	lo7-cs_q30_rye_filter	SECCE7Rv1G0468820.1	Coverage	27.7626
chr7R	103859943	103860095	.	-	PGSB	exon	.	ID=SECCE7Rv1G0468830.1.exon.1;Parent=SECCE7Rv1G0468830.1	SECCE7Rv1G0468830.1	409	present	Chromosome	lo7-cs_q30_rye_filter	SECCE7Rv1G0468830.1	Coverage	26.8373
chr7R	103997095	103997473	.	+	PGSB	exon	.	ID=SECCE7Rv1G0468840.1.exon.1;Parent=SECCE7Rv1G0468840.1	SECCE7Rv1G0468840.1	665	present	Chromosome	lo7-cs_q30_rye_filter	SECCE7Rv1G0468840.1	Coverage	50.2646
chr7R	104045105	104045795	.	+	PGSB	exon	.	ID=SECCE7Rv1G0468850.1.exon.1;Parent=SECCE7Rv1G0468850.1	SECCE7Rv1G0468850.1	0	absent	Chromosome	lo7-cs_q30_rye_filter	SECCE7Rv1G0468850.1	Coverage	0
chr7R	104048344	104048668	.	+	PGSB	exon	.	ID=SECCE7Rv1G0468860.1.exon.1;Parent=SECCE7Rv1G0468860.1	SECCE7Rv1G0468860.1	456	present	Chromosome	lo7-cs_q30_rye_filter	SECCE7Rv1G0468860.1	Coverage	35.4312
chr7R	104056036	104056324	.	-	PGSB	exon	.	ID=SECCE7Rv1G0468870.1.exon.1;Parent=SECCE7Rv1G0468870.1	SECCE7Rv1G0468870.1	0	absent	Chromosome	lo7-cs_q30_rye_filter	SECCE7Rv1G0468870.1	Coverage	0
chr7R	104155374	104155980	.	+	PGSB	exon	.	ID=SECCE7Rv1G0468880.1.exon.1;Parent=SECCE7Rv1G0468880.1	SECCE7Rv1G0468880.1	897	present	Chromosome	lo7-cs_q30_rye_filter	SECCE7Rv1G0468880.1	Coverage	61.9048
chr7R	104239147	104239189	.	+	PGSB	exon	.	ID=SECCE7Rv1G0468890.1.exon.1;Parent=SECCE7Rv1G0468890.1	SECCE7Rv1G0468890.1	0	absent	Chromosome	lo7-cs_q30_rye_filter	SECCE7Rv1G0468890.1	Coverage	0
chr7R	104241121	104241382	.	+	PGSB	exon	.	ID=SECCE7Rv1G0468900.1.exon.1;Parent=SECCE7Rv1G0468900.1	SECCE7Rv1G0468900.1	380	present	Chromosome	lo7-cs_q30_rye_filter	SECCE7Rv1G0468900.1	Coverage	65.6304
chr7R	104303054	104303522	.	+	PGSB	exon	.	ID=SECCE7Rv1G0468910.1.exon.1;Parent=SECCE7Rv1G0468910.1	SECCE7Rv1G0468910.1	1118	present	Chromosome	lo7-cs_q30_rye_filter	SECCE7Rv1G0468910.1	Coverage	86.6667
chr7R	104307323	104308589	.	-	PGSB	exon	.	ID=SECCE7Rv1G0468920.1.exon.1;Parent=SECCE7Rv1G0468920.1	SECCE7Rv1G0468920.1	1161	present	Chromosome	lo7-cs_q30_rye_filter	SECCE7Rv1G0468920.1	Coverage	91.7062
chr7R	104310289	104310595	.	-	PGSB	exon	.	ID=SECCE7Rv1G0468930.1.exon.1;Parent=SECCE7Rv1G0468930.1	SECCE7Rv1G0468930.1	2052	present	Chromosome	lo7-cs_q30_rye_filter	SECCE7Rv1G0468930.1	Coverage	99.7085
chr7R	104412112	104413504	.	-	PGSB	exon	.	ID=SECCE7Rv1G0468940.1.exon.1;Parent=SECCE7Rv1G0468940.1	SECCE7Rv1G0468940.1	1239	present	Chromosome	lo7-cs_q30_rye_filter	SECCE7Rv1G0468940.1	Coverage	89.0086
chr7R	104453694	104453922	.	-	PGSB	exon	.	ID=SECCE7Rv1G0468950.1.exon.1;Parent=SECCE7Rv1G0468950.1	SECCE7Rv1G0468950.1	1502	present	Chromosome	lo7-cs_q30_rye_filter	SECCE7Rv1G0468950.1	Coverage	71.7287
chr7R	104476467	104476558	.	+	PGSB	exon	.	ID=SECCE7Rv1G0468960.1.exon.1;Parent=SECCE7Rv1G0468960.1	SECCE7Rv1G0468960.1	651	present	Chromosome	lo7-cs_q30_rye_filter	SECCE7Rv1G0468960.1	Coverage	100
chr7R	104479448	104479539	.	+	PGSB	exon	.	ID=SECCE7Rv1G0468970.1.exon.1;Parent=SECCE7Rv1G0468970.1	SECCE7Rv1G0468970.1	363	present	Chromosome	lo7-cs_q30_rye_filter	SECCE7Rv1G0468970.1	Coverage	54.5045
chr7R	104552582	104552673	.	+	PGSB	exon	.	ID=SECCE7Rv1G0468980.1.exon.1;Parent=SECCE7Rv1G0468980.1	SECCE7Rv1G0468980.1	0	absent	Chromosome	lo7-cs_q30_rye_filter	SECCE7Rv1G0468980.1	Coverage	0
chr7R	104604471	104604562	.	+	PGSB	exon	.	ID=SECCE7Rv1G0468990.1.exon.1;Parent=SECCE7Rv1G0468990.1	SECCE7Rv1G0468990.1	106	present	Chromosome	lo7-cs_q30_rye_filter	SECCE7Rv1G0468990.1	Coverage	15.9159
chr7R	104632948	104633764	.	-	PGSB	exon	.	ID=SECCE7Rv1G0469000.1.exon.1;Parent=SECCE7Rv1G0469000.1	SECCE7Rv1G0469000.1	556	present	Chromosome	lo7-cs_q30_rye_filter	SECCE7Rv1G0469000.1	Coverage	68.1373
chr7R	104683449	104684081	.	-	PGSB	exon	.	ID=SECCE7Rv1G0469010.1.exon.1;Parent=SECCE7Rv1G0469010.1	SECCE7Rv1G0469010.1	436	present	Chromosome	lo7-cs_q30_rye_filter	SECCE7Rv1G0469010.1	Coverage	57.2178
chr7R	104765867	104765997	.	+	PGSB	exon	.	ID=SECCE7Rv1G0469020.1.exon.1;Parent=SECCE7Rv1G0469020.1	SECCE7Rv1G0469020.1	762	present	Chromosome	lo7-cs_q30_rye_filter	SECCE7Rv1G0469020.1	Coverage	100
chr7R	104773089	104773143	.	-	PGSB	exon	.	ID=SECCE7Rv1G0469030.1.exon.1;Parent=SECCE7Rv1G0469030.1	SECCE7Rv1G0469030.1	912	present	Chromosome	lo7-cs_q30_rye_filter	SECCE7Rv1G0469030.1	Coverage	100
chr7R	105126640	105127141	.	+	PGSB	exon	.	ID=SECCE7Rv1G0469040.1.exon.1;Parent=SECCE7Rv1G0469040.1	SECCE7Rv1G0469040.1	2283	present	Chromosome	lo7-cs_q30_rye_filter	SECCE7Rv1G0469040.1	Coverage	100
chr7R	105136315	105136365	.	-	PGSB	exon	.	ID=SECCE7Rv1G0469050.1.exon.1;Parent=SECCE7Rv1G0469050.1	SECCE7Rv1G0469050.1	1248	present	Chromosome	lo7-cs_q30_rye_filter	SECCE7Rv1G0469050.1	Coverage	100
chr7R	105605076	105605686	.	-	PGSB	exon	.	ID=SECCE7Rv1G0469060.1.exon.1;Parent=SECCE7Rv1G0469060.1	SECCE7Rv1G0469060.1	1101	present	Chromosome	lo7-cs_q30_rye_filter	SECCE7Rv1G0469060.1	Coverage	100
chr7R	105791943	105792225	.	+	PGSB	exon	.	ID=SECCE7Rv1G0469070.1.exon.1;Parent=SECCE7Rv1G0469070.1	SECCE7Rv1G0469070.1	411	present	Chromosome	lo7-cs_q30_rye_filter	SECCE7Rv1G0469070.1	Coverage	37.5342
chr7R	105797840	105798371	.	-	PGSB	exon	.	ID=SECCE7Rv1G0469080.1.exon.1;Parent=SECCE7Rv1G0469080.1	SECCE7Rv1G0469080.1	531	present	Chromosome	lo7-cs_q30_rye_filter	SECCE7Rv1G0469080.1	Coverage	100
chr7R	105829923	105830454	.	-	PGSB	exon	.	ID=SECCE7Rv1G0469090.1.exon.1;Parent=SECCE7Rv1G0469090.1	SECCE7Rv1G0469090.1	261	present	Chromosome	lo7-cs_q30_rye_filter	SECCE7Rv1G0469090.1	Coverage	49.1525
chr7R	105879011	105879548	.	-	PGSB	exon	.	ID=SECCE7Rv1G0469100.1.exon.1;Parent=SECCE7Rv1G0469100.1	SECCE7Rv1G0469100.1	537	present	Chromosome	lo7-cs_q30_rye_filter	SECCE7Rv1G0469100.1	Coverage	100
chr7R	105880889	105881198	.	-	PGSB	exon	.	ID=SECCE7Rv1G0469110.1.exon.1;Parent=SECCE7Rv1G0469110.1	SECCE7Rv1G0469110.1	0	absent	Chromosome	lo7-cs_q30_rye_filter	SECCE7Rv1G0469110.1	Coverage	0
chr7R	105881643	105881648	.	-	PGSB	exon	.	ID=SECCE7Rv1G0469120.1.exon.1;Parent=SECCE7Rv1G0469120.1	SECCE7Rv1G0469120.1	0	absent	Chromosome	lo7-cs_q30_rye_filter	SECCE7Rv1G0469120.1	Coverage	0
chr7R	105916975	105917426	.	+	PGSB	exon	.	ID=SECCE7Rv1G0469130.1.exon.1;Parent=SECCE7Rv1G0469130.1	SECCE7Rv1G0469130.1	451	present	Chromosome	lo7-cs_q30_rye_filter	SECCE7Rv1G0469130.1	Coverage	100
chr7R	106288002	106288179	.	+	PGSB	exon	.	ID=SECCE7Rv1G0469140.1.exon.1;Parent=SECCE7Rv1G0469140.1	SECCE7Rv1G0469140.1	0	absent	Chromosome	lo7-cs_q30_rye_filter	SECCE7Rv1G0469140.1	Coverage	0
chr7R	106307725	106308411	.	+	PGSB	exon	.	ID=SECCE7Rv1G0469150.1.exon.1;Parent=SECCE7Rv1G0469150.1	SECCE7Rv1G0469150.1	0	absent	Chromosome	lo7-cs_q30_rye_filter	SECCE7Rv1G0469150.1	Coverage	0
chr7R	106354640	106354946	.	-	PGSB	exon	.	ID=SECCE7Rv1G0469160.1.exon.1;Parent=SECCE7Rv1G0469160.1	SECCE7Rv1G0469160.1	1231	present	Chromosome	lo7-cs_q30_rye_filter	SECCE7Rv1G0469160.1	Coverage	80.7743
chr7R	106762465	106762732	.	+	PGSB	exon	.	ID=SECCE7Rv1G0469170.1.exon.1;Parent=SECCE7Rv1G0469170.1	SECCE7Rv1G0469170.1	0	absent	Chromosome	lo7-cs_q30_rye_filter	SECCE7Rv1G0469170.1	Coverage	0
chr7R	106852923	106853091	.	-	PGSB	exon	.	ID=SECCE7Rv1G0469180.1.exon.1;Parent=SECCE7Rv1G0469180.1	SECCE7Rv1G0469180.1	0	absent	Chromosome	lo7-cs_q30_rye_filter	SECCE7Rv1G0469180.1	Coverage	0
chr7R	106982612	106983244	.	-	PGSB	exon	.	ID=SECCE7Rv1G0469190.1.exon.1;Parent=SECCE7Rv1G0469190.1	SECCE7Rv1G0469190.1	765	present	Chromosome	lo7-cs_q30_rye_filter	SECCE7Rv1G0469190.1	Coverage	100
chr7R	106985437	106986069	.	-	PGSB	exon	.	ID=SECCE7Rv1G0469200.1.exon.1;Parent=SECCE7Rv1G0469200.1	SECCE7Rv1G0469200.1	636	present	Chromosome	lo7-cs_q30_rye_filter	SECCE7Rv1G0469200.1	Coverage	83.1373
chr7R	107019482	107019795	.	-	PGSB	exon	.	ID=SECCE7Rv1G0469210.1.exon.1;Parent=SECCE7Rv1G0469210.1	SECCE7Rv1G0469210.1	762	present	Chromosome	lo7-cs_q30_rye_filter	SECCE7Rv1G0469210.1	Coverage	100
chr7R	107024306	107024619	.	-	PGSB	exon	.	ID=SECCE7Rv1G0469220.1.exon.1;Parent=SECCE7Rv1G0469220.1	SECCE7Rv1G0469220.1	313	present	Chromosome	lo7-cs_q30_rye_filter	SECCE7Rv1G0469220.1	Coverage	40.1282
chr7R	107087612	107088241	.	-	PGSB	exon	.	ID=SECCE7Rv1G0469230.1.exon.1;Parent=SECCE7Rv1G0469230.1	SECCE7Rv1G0469230.1	771	present	Chromosome	lo7-cs_q30_rye_filter	SECCE7Rv1G0469230.1	Coverage	100
chr7R	107191037	107191778	.	-	PGSB	exon	.	ID=SECCE7Rv1G0469240.1.exon.1;Parent=SECCE7Rv1G0469240.1	SECCE7Rv1G0469240.1	1197	present	Chromosome	lo7-cs_q30_rye_filter	SECCE7Rv1G0469240.1	Coverage	100
chr7R	107220874	107221811	.	-	PGSB	exon	.	ID=SECCE7Rv1G0469250.1.exon.1;Parent=SECCE7Rv1G0469250.1	SECCE7Rv1G0469250.1	1269	present	Chromosome	lo7-cs_q30_rye_filter	SECCE7Rv1G0469250.1	Coverage	100
chr7R	107230837	107231005	.	+	PGSB	exon	.	ID=SECCE7Rv1G0469260.1.exon.1;Parent=SECCE7Rv1G0469260.1	SECCE7Rv1G0469260.1	594	present	Chromosome	lo7-cs_q30_rye_filter	SECCE7Rv1G0469260.1	Coverage	100
chr7R	107447381	107448306	.	-	PGSB	exon	.	ID=SECCE7Rv1G0469270.1.exon.1;Parent=SECCE7Rv1G0469270.1	SECCE7Rv1G0469270.1	1227	present	Chromosome	lo7-cs_q30_rye_filter	SECCE7Rv1G0469270.1	Coverage	100
chr7R	107455823	107456147	.	+	PGSB	exon	.	ID=SECCE7Rv1G0469280.1.exon.1;Parent=SECCE7Rv1G0469280.1	SECCE7Rv1G0469280.1	324	present	Chromosome	lo7-cs_q30_rye_filter	SECCE7Rv1G0469280.1	Coverage	100
chr7R	107456400	107457078	.	+	PGSB	exon	.	ID=SECCE7Rv1G0469290.1.exon.1;Parent=SECCE7Rv1G0469290.1	SECCE7Rv1G0469290.1	389	present	Chromosome	lo7-cs_q30_rye_filter	SECCE7Rv1G0469290.1	Coverage	57.3746
chr7R	107735093	107735405	.	-	PGSB	exon	.	ID=SECCE7Rv1G0469300.1.exon.1;Parent=SECCE7Rv1G0469300.1	SECCE7Rv1G0469300.1	345	present	Chromosome	lo7-cs_q30_rye_filter	SECCE7Rv1G0469300.1	Coverage	8.37582
chr7R	107934679	107935003	.	+	PGSB	exon	.	ID=SECCE7Rv1G0469310.1.exon.1;Parent=SECCE7Rv1G0469310.1	SECCE7Rv1G0469310.1	0	absent	Chromosome	lo7-cs_q30_rye_filter	SECCE7Rv1G0469310.1	Coverage	0
chr7R	107935201	107936743	.	+	PGSB	exon	.	ID=SECCE7Rv1G0469320.1.exon.1;Parent=SECCE7Rv1G0469320.1	SECCE7Rv1G0469320.1	0	absent	Chromosome	lo7-cs_q30_rye_filter	SECCE7Rv1G0469320.1	Coverage	0
chr7R	107939107	107939512	.	+	PGSB	exon	.	ID=SECCE7Rv1G0469330.1.exon.1;Parent=SECCE7Rv1G0469330.1	SECCE7Rv1G0469330.1	92	present	Chromosome	lo7-cs_q30_rye_filter	SECCE7Rv1G0469330.1	Coverage	22.716
chr7R	108311037	108311445	.	+	PGSB	exon	.	ID=SECCE7Rv1G0469340.1.exon.1;Parent=SECCE7Rv1G0469340.1	SECCE7Rv1G0469340.1	408	present	Chromosome	lo7-cs_q30_rye_filter	SECCE7Rv1G0469340.1	Coverage	100
chr7R	108315287	108316227	.	-	PGSB	exon	.	ID=SECCE7Rv1G0469350.1.exon.1;Parent=SECCE7Rv1G0469350.1	SECCE7Rv1G0469350.1	379	present	Chromosome	lo7-cs_q30_rye_filter	SECCE7Rv1G0469350.1	Coverage	30.2958
chr7R	108694810	108695265	.	+	PGSB	exon	.	ID=SECCE7Rv1G0469360.1.exon.1;Parent=SECCE7Rv1G0469360.1	SECCE7Rv1G0469360.1	1458	present	Chromosome	lo7-cs_q30_rye_filter	SECCE7Rv1G0469360.1	Coverage	90.3346
chr7R	108705692	108705835	.	-	PGSB	exon	.	ID=SECCE7Rv1G0469370.1.exon.1;Parent=SECCE7Rv1G0469370.1	SECCE7Rv1G0469370.1	2745	present	Chromosome	lo7-cs_q30_rye_filter	SECCE7Rv1G0469370.1	Coverage	96.8254
chr7R	108848077	108848628	.	+	PGSB	exon	.	ID=SECCE7Rv1G0469380.1.exon.1;Parent=SECCE7Rv1G0469380.1	SECCE7Rv1G0469380.1	1425	present	Chromosome	lo7-cs_q30_rye_filter	SECCE7Rv1G0469380.1	Coverage	100
chr7R	108881512	108881839	.	+	PGSB	exon	.	ID=SECCE7Rv1G0469390.1.exon.1;Parent=SECCE7Rv1G0469390.1	SECCE7Rv1G0469390.1	327	present	Chromosome	lo7-cs_q30_rye_filter	SECCE7Rv1G0469390.1	Coverage	100
chr7R	108881968	108882514	.	+	PGSB	exon	.	ID=SECCE7Rv1G0469400.1.exon.1;Parent=SECCE7Rv1G0469400.1	SECCE7Rv1G0469400.1	546	present	Chromosome	lo7-cs_q30_rye_filter	SECCE7Rv1G0469400.1	Coverage	100
chr7R	108892030	108892604	.	+	PGSB	exon	.	ID=SECCE7Rv1G0469410.1.exon.1;Parent=SECCE7Rv1G0469410.1	SECCE7Rv1G0469410.1	1156	present	Chromosome	lo7-cs_q30_rye_filter	SECCE7Rv1G0469410.1	Coverage	80.2778
chr7R	108940404	108940984	.	+	PGSB	exon	.	ID=SECCE7Rv1G0469420.1.exon.1;Parent=SECCE7Rv1G0469420.1	SECCE7Rv1G0469420.1	1227	present	Chromosome	lo7-cs_q30_rye_filter	SECCE7Rv1G0469420.1	Coverage	81.9639
chr7R	109070195	109070657	.	-	PGSB	exon	.	ID=SECCE7Rv1G0469430.1.exon.1;Parent=SECCE7Rv1G0469430.1	SECCE7Rv1G0469430.1	273	present	Chromosome	lo7-cs_q30_rye_filter	SECCE7Rv1G0469430.1	Coverage	59.0909
chr7R	109073971	109074199	.	-	PGSB	exon	.	ID=SECCE7Rv1G0469440.1.exon.1;Parent=SECCE7Rv1G0469440.1	SECCE7Rv1G0469440.1	0	absent	Chromosome	lo7-cs_q30_rye_filter	SECCE7Rv1G0469440.1	Coverage	0
chr7R	109111348	109111419	.	-	PGSB	exon	.	ID=SECCE7Rv1G0469450.1.exon.1;Parent=SECCE7Rv1G0469450.1	SECCE7Rv1G0469450.1	2371	present	Chromosome	lo7-cs_q30_rye_filter	SECCE7Rv1G0469450.1	Coverage	95.2209
chr7R	109501136	109501682	.	-	PGSB	exon	.	ID=SECCE7Rv1G0469460.1.exon.1;Parent=SECCE7Rv1G0469460.1	SECCE7Rv1G0469460.1	410	present	Chromosome	lo7-cs_q30_rye_filter	SECCE7Rv1G0469460.1	Coverage	75.0916
chr7R	109679062	109679123	.	-	PGSB	exon	.	ID=SECCE7Rv1G0469470.1.exon.1;Parent=SECCE7Rv1G0469470.1	SECCE7Rv1G0469470.1	1224	present	Chromosome	lo7-cs_q30_rye_filter	SECCE7Rv1G0469470.1	Coverage	100
chr7R	109713012	109713223	.	+	PGSB	exon	.	ID=SECCE7Rv1G0469480.1.exon.1;Parent=SECCE7Rv1G0469480.1	SECCE7Rv1G0469480.1	543	present	Chromosome	lo7-cs_q30_rye_filter	SECCE7Rv1G0469480.1	Coverage	78.0172
chr7R	109731254	109732547	.	+	PGSB	exon	.	ID=SECCE7Rv1G0469490.1.exon.1;Parent=SECCE7Rv1G0469490.1	SECCE7Rv1G0469490.1	1726	present	Chromosome	lo7-cs_q30_rye_filter	SECCE7Rv1G0469490.1	Coverage	90.0365
chr7R	109736540	109736629	.	-	PGSB	exon	.	ID=SECCE7Rv1G0469500.1.exon.1;Parent=SECCE7Rv1G0469500.1	SECCE7Rv1G0469500.1	608	present	Chromosome	lo7-cs_q30_rye_filter	SECCE7Rv1G0469500.1	Coverage	71.6137
chr7R	109757511	109757799	.	-	PGSB	exon	.	ID=SECCE7Rv1G0469510.1.exon.1;Parent=SECCE7Rv1G0469510.1	SECCE7Rv1G0469510.1	0	absent	Chromosome	lo7-cs_q30_rye_filter	SECCE7Rv1G0469510.1	Coverage	0
chr7R	109764101	109764278	.	-	PGSB	exon	.	ID=SECCE7Rv1G0469520.1.exon.1;Parent=SECCE7Rv1G0469520.1	SECCE7Rv1G0469520.1	279	present	Chromosome	lo7-cs_q30_rye_filter	SECCE7Rv1G0469520.1	Coverage	87.7358
chr7R	109854620	109854827	.	+	PGSB	exon	.	ID=SECCE7Rv1G0469530.1.exon.1;Parent=SECCE7Rv1G0469530.1	SECCE7Rv1G0469530.1	1147	present	Chromosome	lo7-cs_q30_rye_filter	SECCE7Rv1G0469530.1	Coverage	98.5395
chr7R	109866579	109866829	.	-	PGSB	exon	.	ID=SECCE7Rv1G0469540.1.exon.1;Parent=SECCE7Rv1G0469540.1	SECCE7Rv1G0469540.1	835	present	Chromosome	lo7-cs_q30_rye_filter	SECCE7Rv1G0469540.1	Coverage	72.8621
chr7R	110557415	110557554	.	+	PGSB	exon	.	ID=SECCE7Rv1G0469550.1.exon.1;Parent=SECCE7Rv1G0469550.1	SECCE7Rv1G0469550.1	1159	present	Chromosome	lo7-cs_q30_rye_filter	SECCE7Rv1G0469550.1	Coverage	90.4762
chr7R	110570100	110570115	.	-	PGSB	exon	.	ID=SECCE7Rv1G0469560.1.exon.1;Parent=SECCE7Rv1G0469560.1	SECCE7Rv1G0469560.1	0	absent	Chromosome	lo7-cs_q30_rye_filter	SECCE7Rv1G0469560.1	Coverage	0
chr7R	110576710	110576735	.	+	PGSB	exon	.	ID=SECCE7Rv1G0469570.1.exon.1;Parent=SECCE7Rv1G0469570.1	SECCE7Rv1G0469570.1	600	present	Chromosome	lo7-cs_q30_rye_filter	SECCE7Rv1G0469570.1	Coverage	100
chr7R	110646766	110646822	.	+	PGSB	exon	.	ID=SECCE7Rv1G0469580.1.exon.1;Parent=SECCE7Rv1G0469580.1	SECCE7Rv1G0469580.1	327	present	Chromosome	lo7-cs_q30_rye_filter	SECCE7Rv1G0469580.1	Coverage	100
chr7R	110912572	110912616	.	+	PGSB	exon	.	ID=SECCE7Rv1G0469590.1.exon.1;Parent=SECCE7Rv1G0469590.1	SECCE7Rv1G0469590.1	2442	present	Chromosome	lo7-cs_q30_rye_filter	SECCE7Rv1G0469590.1	Coverage	100
chr7R	110927469	110927733	.	-	PGSB	exon	.	ID=SECCE7Rv1G0469600.1.exon.1;Parent=SECCE7Rv1G0469600.1	SECCE7Rv1G0469600.1	156	present	Chromosome	lo7-cs_q30_rye_filter	SECCE7Rv1G0469600.1	Coverage	59.0909
chr7R	111789913	111789969	.	+	PGSB	exon	.	ID=SECCE7Rv1G0469610.1.exon.1;Parent=SECCE7Rv1G0469610.1	SECCE7Rv1G0469610.1	2281	present	Chromosome	lo7-cs_q30_rye_filter	SECCE7Rv1G0469610.1	Coverage	92.9503
chr7R	111810721	111811582	.	-	PGSB	exon	.	ID=SECCE7Rv1G0469620.1.exon.1;Parent=SECCE7Rv1G0469620.1	SECCE7Rv1G0469620.1	376	present	Chromosome	lo7-cs_q30_rye_filter	SECCE7Rv1G0469620.1	Coverage	43.6702
chr7R	111822800	111823186	.	-	PGSB	exon	.	ID=SECCE7Rv1G0469630.1.exon.1;Parent=SECCE7Rv1G0469630.1	SECCE7Rv1G0469630.1	356	present	Chromosome	lo7-cs_q30_rye_filter	SECCE7Rv1G0469630.1	Coverage	27.856
chr7R	112138313	112138589	.	-	PGSB	exon	.	ID=SECCE7Rv1G0469640.1.exon.1;Parent=SECCE7Rv1G0469640.1	SECCE7Rv1G0469640.1	0	absent	Chromosome	lo7-cs_q30_rye_filter	SECCE7Rv1G0469640.1	Coverage	0
chr7R	112140822	112141099	.	+	PGSB	exon	.	ID=SECCE7Rv1G0469650.1.exon.1;Parent=SECCE7Rv1G0469650.1	SECCE7Rv1G0469650.1	840	present	Chromosome	lo7-cs_q30_rye_filter	SECCE7Rv1G0469650.1	Coverage	60.0858
chr7R	112307348	112307613	.	+	PGSB	exon	.	ID=SECCE7Rv1G0469660.1.exon.1;Parent=SECCE7Rv1G0469660.1	SECCE7Rv1G0469660.1	1025	present	Chromosome	lo7-cs_q30_rye_filter	SECCE7Rv1G0469660.1	Coverage	94.6445
chr7R	112312002	112312129	.	-	PGSB	exon	.	ID=SECCE7Rv1G0469670.1.exon.1;Parent=SECCE7Rv1G0469670.1	SECCE7Rv1G0469670.1	874	present	Chromosome	lo7-cs_q30_rye_filter	SECCE7Rv1G0469670.1	Coverage	73.3837
chr7R	112591924	112591930	.	+	PGSB	exon	.	ID=SECCE7Rv1G0469680.1.exon.1;Parent=SECCE7Rv1G0469680.1	SECCE7Rv1G0469680.1	406	present	Chromosome	lo7-cs_q30_rye_filter	SECCE7Rv1G0469680.1	Coverage	95.3052
chr7R	112597650	112597795	.	-	PGSB	exon	.	ID=SECCE7Rv1G0469690.1.exon.1;Parent=SECCE7Rv1G0469690.1	SECCE7Rv1G0469690.1	416	present	Chromosome	lo7-cs_q30_rye_filter	SECCE7Rv1G0469690.1	Coverage	96.2963
chr7R	112627675	112627741	.	+	PGSB	exon	.	ID=SECCE7Rv1G0469700.1.exon.1;Parent=SECCE7Rv1G0469700.1	SECCE7Rv1G0469700.1	0	absent	Chromosome	lo7-cs_q30_rye_filter	SECCE7Rv1G0469700.1	Coverage	0
chr7R	112629127	112629871	.	+	PGSB	exon	.	ID=SECCE7Rv1G0469710.1.exon.1;Parent=SECCE7Rv1G0469710.1	SECCE7Rv1G0469710.1	410	present	Chromosome	lo7-cs_q30_rye_filter	SECCE7Rv1G0469710.1	Coverage	55.1075
chr7R	112788416	112788534	.	+	PGSB	exon	.	ID=SECCE7Rv1G0469720.1.exon.1;Parent=SECCE7Rv1G0469720.1	SECCE7Rv1G0469720.1	1632	present	Chromosome	lo7-cs_q30_rye_filter	SECCE7Rv1G0469720.1	Coverage	100
chr7R	112793429	112793650	.	-	PGSB	exon	.	ID=SECCE7Rv1G0469730.1.exon.1;Parent=SECCE7Rv1G0469730.1	SECCE7Rv1G0469730.1	324	present	Chromosome	lo7-cs_q30_rye_filter	SECCE7Rv1G0469730.1	Coverage	52.4272
chr7R	112795931	112796116	.	-	PGSB	exon	.	ID=SECCE7Rv1G0469740.1.exon.1;Parent=SECCE7Rv1G0469740.1	SECCE7Rv1G0469740.1	783	present	Chromosome	lo7-cs_q30_rye_filter	SECCE7Rv1G0469740.1	Coverage	100
chr7R	112868163	112868686	.	+	PGSB	exon	.	ID=SECCE7Rv1G0469750.1.exon.1;Parent=SECCE7Rv1G0469750.1	SECCE7Rv1G0469750.1	233	present	Chromosome	lo7-cs_q30_rye_filter	SECCE7Rv1G0469750.1	Coverage	18.5362
chr7R	112869558	112870024	.	+	PGSB	exon	.	ID=SECCE7Rv1G0469760.1.exon.1;Parent=SECCE7Rv1G0469760.1	SECCE7Rv1G0469760.1	0	absent	Chromosome	lo7-cs_q30_rye_filter	SECCE7Rv1G0469760.1	Coverage	0
chr7R	112870166	112870238	.	+	PGSB	exon	.	ID=SECCE7Rv1G0469770.1.exon.1;Parent=SECCE7Rv1G0469770.1	SECCE7Rv1G0469770.1	0	absent	Chromosome	lo7-cs_q30_rye_filter	SECCE7Rv1G0469770.1	Coverage	0
chr7R	112981377	112981565	.	+	PGSB	exon	.	ID=SECCE7Rv1G0469780.1.exon.1;Parent=SECCE7Rv1G0469780.1	SECCE7Rv1G0469780.1	1351	present	Chromosome	lo7-cs_q30_rye_filter	SECCE7Rv1G0469780.1	Coverage	88.1279
chr7R	113149135	113149215	.	+	PGSB	exon	.	ID=SECCE7Rv1G0469790.1.exon.1;Parent=SECCE7Rv1G0469790.1	SECCE7Rv1G0469790.1	3096	present	Chromosome	lo7-cs_q30_rye_filter	SECCE7Rv1G0469790.1	Coverage	96.0894
chr7R	113630103	113631717	.	+	PGSB	exon	.	ID=SECCE7Rv1G0469800.1.exon.1;Parent=SECCE7Rv1G0469800.1	SECCE7Rv1G0469800.1	1434	present	Chromosome	lo7-cs_q30_rye_filter	SECCE7Rv1G0469800.1	Coverage	88.8476
chr7R	113641362	113642129	.	+	PGSB	exon	.	ID=SECCE7Rv1G0469810.1.exon.1;Parent=SECCE7Rv1G0469810.1	SECCE7Rv1G0469810.1	1047	present	Chromosome	lo7-cs_q30_rye_filter	SECCE7Rv1G0469810.1	Coverage	88.3544
chr7R	113656707	113656934	.	+	PGSB	exon	.	ID=SECCE7Rv1G0469820.1.exon.1;Parent=SECCE7Rv1G0469820.1	SECCE7Rv1G0469820.1	957	present	Chromosome	lo7-cs_q30_rye_filter	SECCE7Rv1G0469820.1	Coverage	100
chr7R	113663479	113663686	.	+	PGSB	exon	.	ID=SECCE7Rv1G0469830.1.exon.1;Parent=SECCE7Rv1G0469830.1	SECCE7Rv1G0469830.1	0	absent	Chromosome	lo7-cs_q30_rye_filter	SECCE7Rv1G0469830.1	Coverage	0
chr7R	113663805	113664102	.	+	PGSB	exon	.	ID=SECCE7Rv1G0469840.1.exon.1;Parent=SECCE7Rv1G0469840.1	SECCE7Rv1G0469840.1	0	absent	Chromosome	lo7-cs_q30_rye_filter	SECCE7Rv1G0469840.1	Coverage	0
chr7R	113946002	113946112	.	+	PGSB	exon	.	ID=SECCE7Rv1G0469850.1.exon.1;Parent=SECCE7Rv1G0469850.1	SECCE7Rv1G0469850.1	0	absent	Chromosome	lo7-cs_q30_rye_filter	SECCE7Rv1G0469850.1	Coverage	0
chr7R	113964227	113965384	.	+	PGSB	exon	.	ID=SECCE7Rv1G0469860.1.exon.1;Parent=SECCE7Rv1G0469860.1	SECCE7Rv1G0469860.1	1332	present	Chromosome	lo7-cs_q30_rye_filter	SECCE7Rv1G0469860.1	Coverage	88.6228
chr7R	113966542	113966751	.	+	PGSB	exon	.	ID=SECCE7Rv1G0469870.1.exon.1;Parent=SECCE7Rv1G0469870.1	SECCE7Rv1G0469870.1	558	present	Chromosome	lo7-cs_q30_rye_filter	SECCE7Rv1G0469870.1	Coverage	91.1765
chr7R	113969313	113969454	.	-	PGSB	exon	.	ID=SECCE7Rv1G0469880.1.exon.1;Parent=SECCE7Rv1G0469880.1	SECCE7Rv1G0469880.1	667	present	Chromosome	lo7-cs_q30_rye_filter	SECCE7Rv1G0469880.1	Coverage	61.9313
chr7R	114185308	114185652	.	+	PGSB	exon	.	ID=SECCE7Rv1G0469890.1.exon.1;Parent=SECCE7Rv1G0469890.1	SECCE7Rv1G0469890.1	1086	present	Chromosome	lo7-cs_q30_rye_filter	SECCE7Rv1G0469890.1	Coverage	100
chr7R	114417192	114417342	.	-	PGSB	exon	.	ID=SECCE7Rv1G0469900.1.exon.1;Parent=SECCE7Rv1G0469900.1	SECCE7Rv1G0469900.1	1689	present	Chromosome	lo7-cs_q30_rye_filter	SECCE7Rv1G0469900.1	Coverage	100
chr7R	114437173	114437305	.	-	PGSB	exon	.	ID=SECCE7Rv1G0469910.1.exon.1;Parent=SECCE7Rv1G0469910.1	SECCE7Rv1G0469910.1	774	present	Chromosome	lo7-cs_q30_rye_filter	SECCE7Rv1G0469910.1	Coverage	100
chr7R	114438755	114439148	.	-	PGSB	exon	.	ID=SECCE7Rv1G0469920.1.exon.1;Parent=SECCE7Rv1G0469920.1	SECCE7Rv1G0469920.1	393	present	Chromosome	lo7-cs_q30_rye_filter	SECCE7Rv1G0469920.1	Coverage	100
chr7R	114719247	114720338	.	+	PGSB	exon	.	ID=SECCE7Rv1G0469930.1.exon.1;Parent=SECCE7Rv1G0469930.1	SECCE7Rv1G0469930.1	1839	present	Chromosome	lo7-cs_q30_rye_filter	SECCE7Rv1G0469930.1	Coverage	100
chr7R	114724604	114725264	.	-	PGSB	exon	.	ID=SECCE7Rv1G0469940.1.exon.1;Parent=SECCE7Rv1G0469940.1	SECCE7Rv1G0469940.1	1506	present	Chromosome	lo7-cs_q30_rye_filter	SECCE7Rv1G0469940.1	Coverage	100
chr7R	114878815	114878930	.	+	PGSB	exon	.	ID=SECCE7Rv1G0469950.1.exon.1;Parent=SECCE7Rv1G0469950.1	SECCE7Rv1G0469950.1	1521	present	Chromosome	lo7-cs_q30_rye_filter	SECCE7Rv1G0469950.1	Coverage	100
chr7R	115050753	115050835	.	+	PGSB	exon	.	ID=SECCE7Rv1G0469960.1.exon.1;Parent=SECCE7Rv1G0469960.1	SECCE7Rv1G0469960.1	1467	present	Chromosome	lo7-cs_q30_rye_filter	SECCE7Rv1G0469960.1	Coverage	100
chr7R	115054902	115056102	.	-	PGSB	exon	.	ID=SECCE7Rv1G0469970.1.exon.1;Parent=SECCE7Rv1G0469970.1	SECCE7Rv1G0469970.1	1200	present	Chromosome	lo7-cs_q30_rye_filter	SECCE7Rv1G0469970.1	Coverage	100
chr7R	115065060	115066281	.	-	PGSB	exon	.	ID=SECCE7Rv1G0469980.1.exon.1;Parent=SECCE7Rv1G0469980.1	SECCE7Rv1G0469980.1	596	present	Chromosome	lo7-cs_q30_rye_filter	SECCE7Rv1G0469980.1	Coverage	48.8124
chr7R	115320915	115321159	.	+	PGSB	exon	.	ID=SECCE7Rv1G0469990.1.exon.1;Parent=SECCE7Rv1G0469990.1	SECCE7Rv1G0469990.1	560	present	Chromosome	lo7-cs_q30_rye_filter	SECCE7Rv1G0469990.1	Coverage	87.2274
chr7R	115324687	115324856	.	+	PGSB	exon	.	ID=SECCE7Rv1G0470000.1.exon.1;Parent=SECCE7Rv1G0470000.1	SECCE7Rv1G0470000.1	239	present	Chromosome	lo7-cs_q30_rye_filter	SECCE7Rv1G0470000.1	Coverage	39.8333
chr7R	115345284	115345857	.	+	PGSB	exon	.	ID=SECCE7Rv1G0470010.1.exon.1;Parent=SECCE7Rv1G0470010.1	SECCE7Rv1G0470010.1	562	present	Chromosome	lo7-cs_q30_rye_filter	SECCE7Rv1G0470010.1	Coverage	98.0803
chr7R	115350402	115350789	.	+	PGSB	exon	.	ID=SECCE7Rv1G0470020.1.exon.1;Parent=SECCE7Rv1G0470020.1	SECCE7Rv1G0470020.1	0	absent	Chromosome	lo7-cs_q30_rye_filter	SECCE7Rv1G0470020.1	Coverage	0
chr7R	115351312	115351621	.	+	PGSB	exon	.	ID=SECCE7Rv1G0470030.1.exon.1;Parent=SECCE7Rv1G0470030.1	SECCE7Rv1G0470030.1	229	present	Chromosome	lo7-cs_q30_rye_filter	SECCE7Rv1G0470030.1	Coverage	74.11
chr7R	115458255	115458861	.	+	PGSB	exon	.	ID=SECCE7Rv1G0470040.1.exon.1;Parent=SECCE7Rv1G0470040.1	SECCE7Rv1G0470040.1	1152	present	Chromosome	lo7-cs_q30_rye_filter	SECCE7Rv1G0470040.1	Coverage	100
chr7R	115492953	115493073	.	-	PGSB	exon	.	ID=SECCE7Rv1G0470050.1.exon.1;Parent=SECCE7Rv1G0470050.1	SECCE7Rv1G0470050.1	0	absent	Chromosome	lo7-cs_q30_rye_filter	SECCE7Rv1G0470050.1	Coverage	0
chr7R	115500908	115501578	.	-	PGSB	exon	.	ID=SECCE7Rv1G0470060.1.exon.1;Parent=SECCE7Rv1G0470060.1	SECCE7Rv1G0470060.1	1286	present	Chromosome	lo7-cs_q30_rye_filter	SECCE7Rv1G0470060.1	Coverage	79.9751
chr7R	115846534	115846781	.	+	PGSB	exon	.	ID=SECCE7Rv1G0470070.1.exon.1;Parent=SECCE7Rv1G0470070.1	SECCE7Rv1G0470070.1	1064	present	Chromosome	lo7-cs_q30_rye_filter	SECCE7Rv1G0470070.1	Coverage	75.1412
chr7R	115997735	115997758	.	+	PGSB	exon	.	ID=SECCE7Rv1G0470080.1.exon.1;Parent=SECCE7Rv1G0470080.1	SECCE7Rv1G0470080.1	1338	present	Chromosome	lo7-cs_q30_rye_filter	SECCE7Rv1G0470080.1	Coverage	100
chr7R	116001618	116001782	.	-	PGSB	exon	.	ID=SECCE7Rv1G0470090.1.exon.1;Parent=SECCE7Rv1G0470090.1	SECCE7Rv1G0470090.1	19	absent	Chromosome	lo7-cs_q30_rye_filter	SECCE7Rv1G0470090.1	Coverage	2.76565
chr7R	116005656	116006025	.	+	PGSB	exon	.	ID=SECCE7Rv1G0470100.1.exon.1;Parent=SECCE7Rv1G0470100.1	SECCE7Rv1G0470100.1	3078	present	Chromosome	lo7-cs_q30_rye_filter	SECCE7Rv1G0470100.1	Coverage	100
chr7R	116021939	116022092	.	-	PGSB	exon	.	ID=SECCE7Rv1G0470110.1.exon.1;Parent=SECCE7Rv1G0470110.1	SECCE7Rv1G0470110.1	1992	present	Chromosome	lo7-cs_q30_rye_filter	SECCE7Rv1G0470110.1	Coverage	100
chr7R	116404107	116404470	.	+	PGSB	exon	.	ID=SECCE7Rv1G0470120.1.exon.1;Parent=SECCE7Rv1G0470120.1	SECCE7Rv1G0470120.1	1097	present	Chromosome	lo7-cs_q30_rye_filter	SECCE7Rv1G0470120.1	Coverage	54.7405
chr7R	116411572	116411899	.	+	PGSB	exon	.	ID=SECCE7Rv1G0470130.1.exon.1;Parent=SECCE7Rv1G0470130.1	SECCE7Rv1G0470130.1	313	present	Chromosome	lo7-cs_q30_rye_filter	SECCE7Rv1G0470130.1	Coverage	15.9045
chr7R	116503859	116504303	.	-	PGSB	exon	.	ID=SECCE7Rv1G0470140.1.exon.1;Parent=SECCE7Rv1G0470140.1	SECCE7Rv1G0470140.1	444	present	Chromosome	lo7-cs_q30_rye_filter	SECCE7Rv1G0470140.1	Coverage	100
chr7R	116808335	116808580	.	+	PGSB	exon	.	ID=SECCE7Rv1G0470150.1.exon.1;Parent=SECCE7Rv1G0470150.1	SECCE7Rv1G0470150.1	621	present	Chromosome	lo7-cs_q30_rye_filter	SECCE7Rv1G0470150.1	Coverage	100
chr7R	116895605	116895653	.	+	PGSB	exon	.	ID=SECCE7Rv1G0470160.1.exon.1;Parent=SECCE7Rv1G0470160.1	SECCE7Rv1G0470160.1	344	present	Chromosome	lo7-cs_q30_rye_filter	SECCE7Rv1G0470160.1	Coverage	86.2155
chr7R	116896573	116896584	.	+	PGSB	exon	.	ID=SECCE7Rv1G0470170.1.exon.1;Parent=SECCE7Rv1G0470170.1	SECCE7Rv1G0470170.1	650	present	Chromosome	lo7-cs_q30_rye_filter	SECCE7Rv1G0470170.1	Coverage	98.0392
chr7R	117026690	117027239	.	-	PGSB	exon	.	ID=SECCE7Rv1G0470180.1.exon.1;Parent=SECCE7Rv1G0470180.1	SECCE7Rv1G0470180.1	549	present	Chromosome	lo7-cs_q30_rye_filter	SECCE7Rv1G0470180.1	Coverage	100
chr7R	117364452	117364818	.	-	PGSB	exon	.	ID=SECCE7Rv1G0470190.1.exon.1;Parent=SECCE7Rv1G0470190.1	SECCE7Rv1G0470190.1	0	absent	Chromosome	lo7-cs_q30_rye_filter	SECCE7Rv1G0470190.1	Coverage	0
chr7R	117501378	117502323	.	-	PGSB	exon	.	ID=SECCE7Rv1G0470200.1.exon.1;Parent=SECCE7Rv1G0470200.1	SECCE7Rv1G0470200.1	362	present	Chromosome	lo7-cs_q30_rye_filter	SECCE7Rv1G0470200.1	Coverage	38.3069
chr7R	117695018	117695330	.	-	PGSB	exon	.	ID=SECCE7Rv1G0470210.1.exon.1;Parent=SECCE7Rv1G0470210.1	SECCE7Rv1G0470210.1	333	present	Chromosome	lo7-cs_q30_rye_filter	SECCE7Rv1G0470210.1	Coverage	100
chr7R	117695606	117696446	.	-	PGSB	exon	.	ID=SECCE7Rv1G0470220.1.exon.1;Parent=SECCE7Rv1G0470220.1	SECCE7Rv1G0470220.1	889	present	Chromosome	lo7-cs_q30_rye_filter	SECCE7Rv1G0470220.1	Coverage	81.86
chr7R	117698650	117699472	.	-	PGSB	exon	.	ID=SECCE7Rv1G0470230.1.exon.1;Parent=SECCE7Rv1G0470230.1	SECCE7Rv1G0470230.1	1508	present	Chromosome	lo7-cs_q30_rye_filter	SECCE7Rv1G0470230.1	Coverage	94.3089
chr7R	117846795	117846803	.	-	PGSB	exon	.	ID=SECCE7Rv1G0470240.1.exon.1;Parent=SECCE7Rv1G0470240.1	SECCE7Rv1G0470240.1	819	present	Chromosome	lo7-cs_q30_rye_filter	SECCE7Rv1G0470240.1	Coverage	95.4545
chr7R	118013949	118014070	.	+	PGSB	exon	.	ID=SECCE7Rv1G0470250.1.exon.1;Parent=SECCE7Rv1G0470250.1	SECCE7Rv1G0470250.1	1503	present	Chromosome	lo7-cs_q30_rye_filter	SECCE7Rv1G0470250.1	Coverage	96.3462
chr7R	118086610	118086734	.	+	PGSB	exon	.	ID=SECCE7Rv1G0470260.1.exon.1;Parent=SECCE7Rv1G0470260.1	SECCE7Rv1G0470260.1	1165	present	Chromosome	lo7-cs_q30_rye_filter	SECCE7Rv1G0470260.1	Coverage	72.5857
chr7R	118242709	118242995	.	+	PGSB	exon	.	ID=SECCE7Rv1G0470270.1.exon.1;Parent=SECCE7Rv1G0470270.1	SECCE7Rv1G0470270.1	1325	present	Chromosome	lo7-cs_q30_rye_filter	SECCE7Rv1G0470270.1	Coverage	85.7605
chr7R	118246810	118246885	.	-	PGSB	exon	.	ID=SECCE7Rv1G0470280.1.exon.1;Parent=SECCE7Rv1G0470280.1	SECCE7Rv1G0470280.1	1200	present	Chromosome	lo7-cs_q30_rye_filter	SECCE7Rv1G0470280.1	Coverage	100
chr7R	118585677	118585834	.	-	PGSB	exon	.	ID=SECCE7Rv1G0470290.1.exon.1;Parent=SECCE7Rv1G0470290.1	SECCE7Rv1G0470290.1	1110	present	Chromosome	lo7-cs_q30_rye_filter	SECCE7Rv1G0470290.1	Coverage	100
chr7R	118838011	118838114	.	+	PGSB	exon	.	ID=SECCE7Rv1G0470300.1.exon.1;Parent=SECCE7Rv1G0470300.1	SECCE7Rv1G0470300.1	1437	present	Chromosome	lo7-cs_q30_rye_filter	SECCE7Rv1G0470300.1	Coverage	91.4122
chr7R	119045040	119045376	.	-	PGSB	exon	.	ID=SECCE7Rv1G0470310.1.exon.1;Parent=SECCE7Rv1G0470310.1	SECCE7Rv1G0470310.1	336	present	Chromosome	lo7-cs_q30_rye_filter	SECCE7Rv1G0470310.1	Coverage	100
chr7R	119045841	119046018	.	-	PGSB	exon	.	ID=SECCE7Rv1G0470320.1.exon.1;Parent=SECCE7Rv1G0470320.1	SECCE7Rv1G0470320.1	362	present	Chromosome	lo7-cs_q30_rye_filter	SECCE7Rv1G0470320.1	Coverage	80.4444
chr7R	119123096	119124104	.	-	PGSB	exon	.	ID=SECCE7Rv1G0470330.1.exon.1;Parent=SECCE7Rv1G0470330.1	SECCE7Rv1G0470330.1	1008	present	Chromosome	lo7-cs_q30_rye_filter	SECCE7Rv1G0470330.1	Coverage	100
chr7R	119218295	119218631	.	+	PGSB	exon	.	ID=SECCE7Rv1G0470340.1.exon.1;Parent=SECCE7Rv1G0470340.1	SECCE7Rv1G0470340.1	0	absent	Chromosome	lo7-cs_q30_rye_filter	SECCE7Rv1G0470340.1	Coverage	0
chr7R	119231158	119231995	.	-	PGSB	exon	.	ID=SECCE7Rv1G0470350.1.exon.1;Parent=SECCE7Rv1G0470350.1	SECCE7Rv1G0470350.1	566	present	Chromosome	lo7-cs_q30_rye_filter	SECCE7Rv1G0470350.1	Coverage	67.6225
chr7R	119473800	119474228	.	+	PGSB	exon	.	ID=SECCE7Rv1G0470360.1.exon.1;Parent=SECCE7Rv1G0470360.1	SECCE7Rv1G0470360.1	1687	present	Chromosome	lo7-cs_q30_rye_filter	SECCE7Rv1G0470360.1	Coverage	87.4546
chr7R	119874721	119874881	.	+	PGSB	exon	.	ID=SECCE7Rv1G0470370.1.exon.1;Parent=SECCE7Rv1G0470370.1	SECCE7Rv1G0470370.1	781	present	Chromosome	lo7-cs_q30_rye_filter	SECCE7Rv1G0470370.1	Coverage	55.8655
chr7R	119983576	119983790	.	+	PGSB	exon	.	ID=SECCE7Rv1G0470380.1.exon.1;Parent=SECCE7Rv1G0470380.1	SECCE7Rv1G0470380.1	567	present	Chromosome	lo7-cs_q30_rye_filter	SECCE7Rv1G0470380.1	Coverage	75.9036
chr7R	119988537	119988798	.	-	PGSB	exon	.	ID=SECCE7Rv1G0470390.1.exon.1;Parent=SECCE7Rv1G0470390.1	SECCE7Rv1G0470390.1	690	present	Chromosome	lo7-cs_q30_rye_filter	SECCE7Rv1G0470390.1	Coverage	100
chr7R	120024432	120025260	.	+	PGSB	exon	.	ID=SECCE7Rv1G0470400.1.exon.1;Parent=SECCE7Rv1G0470400.1	SECCE7Rv1G0470400.1	0	absent	Chromosome	lo7-cs_q30_rye_filter	SECCE7Rv1G0470400.1	Coverage	0
chr7R	120027497	120027637	.	-	PGSB	exon	.	ID=SECCE7Rv1G0470410.1.exon.1;Parent=SECCE7Rv1G0470410.1	SECCE7Rv1G0470410.1	531	present	Chromosome	lo7-cs_q30_rye_filter	SECCE7Rv1G0470410.1	Coverage	42.446
chr7R	120030923	120031297	.	+	PGSB	exon	.	ID=SECCE7Rv1G0470420.1.exon.1;Parent=SECCE7Rv1G0470420.1	SECCE7Rv1G0470420.1	895	present	Chromosome	lo7-cs_q30_rye_filter	SECCE7Rv1G0470420.1	Coverage	70.528
chr7R	120282812	120283100	.	+	PGSB	exon	.	ID=SECCE7Rv1G0470430.1.exon.1;Parent=SECCE7Rv1G0470430.1	SECCE7Rv1G0470430.1	539	present	Chromosome	lo7-cs_q30_rye_filter	SECCE7Rv1G0470430.1	Coverage	80.568
chr7R	120401726	120402068	.	+	PGSB	exon	.	ID=SECCE7Rv1G0470440.1.exon.1;Parent=SECCE7Rv1G0470440.1	SECCE7Rv1G0470440.1	0	absent	Chromosome	lo7-cs_q30_rye_filter	SECCE7Rv1G0470440.1	Coverage	0
chr7R	120537507	120538671	.	+	PGSB	exon	.	ID=SECCE7Rv1G0470450.1.exon.1;Parent=SECCE7Rv1G0470450.1	SECCE7Rv1G0470450.1	1164	present	Chromosome	lo7-cs_q30_rye_filter	SECCE7Rv1G0470450.1	Coverage	100
chr7R	120584998	120585037	.	-	PGSB	exon	.	ID=SECCE7Rv1G0470460.1.exon.1;Parent=SECCE7Rv1G0470460.1	SECCE7Rv1G0470460.1	612	present	Chromosome	lo7-cs_q30_rye_filter	SECCE7Rv1G0470460.1	Coverage	100
chr7R	120587789	120587974	.	-	PGSB	exon	.	ID=SECCE7Rv1G0470470.1.exon.1;Parent=SECCE7Rv1G0470470.1	SECCE7Rv1G0470470.1	0	absent	Chromosome	lo7-cs_q30_rye_filter	SECCE7Rv1G0470470.1	Coverage	0
chr7R	120792690	120792995	.	+	PGSB	exon	.	ID=SECCE7Rv1G0470480.1.exon.1;Parent=SECCE7Rv1G0470480.1	SECCE7Rv1G0470480.1	917	present	Chromosome	lo7-cs_q30_rye_filter	SECCE7Rv1G0470480.1	Coverage	77.9762
chr7R	120989654	120989913	.	+	PGSB	exon	.	ID=SECCE7Rv1G0470490.1.exon.1;Parent=SECCE7Rv1G0470490.1	SECCE7Rv1G0470490.1	259	present	Chromosome	lo7-cs_q30_rye_filter	SECCE7Rv1G0470490.1	Coverage	38.2006
chr7R	120992418	120992467	.	+	PGSB	exon	.	ID=SECCE7Rv1G0470500.1.exon.1;Parent=SECCE7Rv1G0470500.1	SECCE7Rv1G0470500.1	483	present	Chromosome	lo7-cs_q30_rye_filter	SECCE7Rv1G0470500.1	Coverage	100
chr7R	121838299	121838358	.	+	PGSB	exon	.	ID=SECCE7Rv1G0470510.1.exon.1;Parent=SECCE7Rv1G0470510.1	SECCE7Rv1G0470510.1	520	present	Chromosome	lo7-cs_q30_rye_filter	SECCE7Rv1G0470510.1	Coverage	65.6566
chr7R	121841470	121841805	.	-	PGSB	exon	.	ID=SECCE7Rv1G0470520.1.exon.1;Parent=SECCE7Rv1G0470520.1	SECCE7Rv1G0470520.1	1492	present	Chromosome	lo7-cs_q30_rye_filter	SECCE7Rv1G0470520.1	Coverage	68.409
chr7R	121849660	121849730	.	-	PGSB	exon	.	ID=SECCE7Rv1G0470530.1.exon.1;Parent=SECCE7Rv1G0470530.1	SECCE7Rv1G0470530.1	1017	present	Chromosome	lo7-cs_q30_rye_filter	SECCE7Rv1G0470530.1	Coverage	100
chr7R	121854006	121854124	.	-	PGSB	exon	.	ID=SECCE7Rv1G0470540.1.exon.1;Parent=SECCE7Rv1G0470540.1	SECCE7Rv1G0470540.1	555	present	Chromosome	lo7-cs_q30_rye_filter	SECCE7Rv1G0470540.1	Coverage	100
chr7R	122395946	122396534	.	+	PGSB	exon	.	ID=SECCE7Rv1G0470550.1.exon.1;Parent=SECCE7Rv1G0470550.1	SECCE7Rv1G0470550.1	1437	present	Chromosome	lo7-cs_q30_rye_filter	SECCE7Rv1G0470550.1	Coverage	100
chr7R	122507086	122507334	.	+	PGSB	exon	.	ID=SECCE7Rv1G0470560.1.exon.1;Parent=SECCE7Rv1G0470560.1	SECCE7Rv1G0470560.1	650	present	Chromosome	lo7-cs_q30_rye_filter	SECCE7Rv1G0470560.1	Coverage	74.2009
chr7R	122509944	122510148	.	-	PGSB	exon	.	ID=SECCE7Rv1G0470570.1.exon.1;Parent=SECCE7Rv1G0470570.1	SECCE7Rv1G0470570.1	1193	present	Chromosome	lo7-cs_q30_rye_filter	SECCE7Rv1G0470570.1	Coverage	67.2871
chr7R	122513503	122513749	.	+	PGSB	exon	.	ID=SECCE7Rv1G0470580.1.exon.1;Parent=SECCE7Rv1G0470580.1	SECCE7Rv1G0470580.1	246	present	Chromosome	lo7-cs_q30_rye_filter	SECCE7Rv1G0470580.1	Coverage	32.5397
chr7R	122522452	122524822	.	+	PGSB	exon	.	ID=SECCE7Rv1G0470590.1.exon.1;Parent=SECCE7Rv1G0470590.1	SECCE7Rv1G0470590.1	958	present	Chromosome	lo7-cs_q30_rye_filter	SECCE7Rv1G0470590.1	Coverage	40.4219
chr7R	122528033	122528097	.	+	PGSB	exon	.	ID=SECCE7Rv1G0470600.1.exon.1;Parent=SECCE7Rv1G0470600.1	SECCE7Rv1G0470600.1	546	present	Chromosome	lo7-cs_q30_rye_filter	SECCE7Rv1G0470600.1	Coverage	31.5972
chr7R	123122355	123122413	.	-	PGSB	exon	.	ID=SECCE7Rv1G0470610.1.exon.1;Parent=SECCE7Rv1G0470610.1	SECCE7Rv1G0470610.1	388	present	Chromosome	lo7-cs_q30_rye_filter	SECCE7Rv1G0470610.1	Coverage	47.0303
chr7R	123124652	123124822	.	+	PGSB	exon	.	ID=SECCE7Rv1G0470620.1.exon.1;Parent=SECCE7Rv1G0470620.1	SECCE7Rv1G0470620.1	774	present	Chromosome	lo7-cs_q30_rye_filter	SECCE7Rv1G0470620.1	Coverage	67.013
chr7R	123134108	123135344	.	-	PGSB	exon	.	ID=SECCE7Rv1G0470630.1.exon.1;Parent=SECCE7Rv1G0470630.1	SECCE7Rv1G0470630.1	309	present	Chromosome	lo7-cs_q30_rye_filter	SECCE7Rv1G0470630.1	Coverage	17.6672
chr7R	123371999	123372098	.	-	PGSB	exon	.	ID=SECCE7Rv1G0470640.1.exon.1;Parent=SECCE7Rv1G0470640.1	SECCE7Rv1G0470640.1	843	present	Chromosome	lo7-cs_q30_rye_filter	SECCE7Rv1G0470640.1	Coverage	100
chr7R	123379947	123380254	.	-	PGSB	exon	.	ID=SECCE7Rv1G0470650.1.exon.1;Parent=SECCE7Rv1G0470650.1	SECCE7Rv1G0470650.1	834	present	Chromosome	lo7-cs_q30_rye_filter	SECCE7Rv1G0470650.1	Coverage	100
chr7R	123384739	123384982	.	-	PGSB	exon	.	ID=SECCE7Rv1G0470660.1.exon.1;Parent=SECCE7Rv1G0470660.1	SECCE7Rv1G0470660.1	1146	present	Chromosome	lo7-cs_q30_rye_filter	SECCE7Rv1G0470660.1	Coverage	100
chr7R	123391522	123392133	.	-	PGSB	exon	.	ID=SECCE7Rv1G0470670.1.exon.1;Parent=SECCE7Rv1G0470670.1	SECCE7Rv1G0470670.1	690	present	Chromosome	lo7-cs_q30_rye_filter	SECCE7Rv1G0470670.1	Coverage	64.0669
chr7R	123395846	123396143	.	+	PGSB	exon	.	ID=SECCE7Rv1G0470680.1.exon.1;Parent=SECCE7Rv1G0470680.1	SECCE7Rv1G0470680.1	204	present	Chromosome	lo7-cs_q30_rye_filter	SECCE7Rv1G0470680.1	Coverage	68.6869
chr7R	123407389	123407606	.	+	PGSB	exon	.	ID=SECCE7Rv1G0470690.1.exon.1;Parent=SECCE7Rv1G0470690.1	SECCE7Rv1G0470690.1	683	present	Chromosome	lo7-cs_q30_rye_filter	SECCE7Rv1G0470690.1	Coverage	51.2763
chr7R	123515715	123516024	.	-	PGSB	exon	.	ID=SECCE7Rv1G0470700.1.exon.1;Parent=SECCE7Rv1G0470700.1	SECCE7Rv1G0470700.1	223	present	Chromosome	lo7-cs_q30_rye_filter	SECCE7Rv1G0470700.1	Coverage	48.9035
chr7R	123518768	123519032	.	-	PGSB	exon	.	ID=SECCE7Rv1G0470710.1.exon.1;Parent=SECCE7Rv1G0470710.1	SECCE7Rv1G0470710.1	0	absent	Chromosome	lo7-cs_q30_rye_filter	SECCE7Rv1G0470710.1	Coverage	0
chr7R	123520808	123521054	.	-	PGSB	exon	.	ID=SECCE7Rv1G0470720.1.exon.1;Parent=SECCE7Rv1G0470720.1	SECCE7Rv1G0470720.1	0	absent	Chromosome	lo7-cs_q30_rye_filter	SECCE7Rv1G0470720.1	Coverage	0
chr7R	123550928	123552089	.	+	PGSB	exon	.	ID=SECCE7Rv1G0470730.1.exon.1;Parent=SECCE7Rv1G0470730.1	SECCE7Rv1G0470730.1	675	present	Chromosome	lo7-cs_q30_rye_filter	SECCE7Rv1G0470730.1	Coverage	58.1395
chr7R	123553657	123553833	.	+	PGSB	exon	.	ID=SECCE7Rv1G0470740.1.exon.1;Parent=SECCE7Rv1G0470740.1	SECCE7Rv1G0470740.1	5177	present	Chromosome	lo7-cs_q30_rye_filter	SECCE7Rv1G0470740.1	Coverage	88.7232
chr7R	123567663	123567749	.	+	PGSB	exon	.	ID=SECCE7Rv1G0470750.1.exon.1;Parent=SECCE7Rv1G0470750.1	SECCE7Rv1G0470750.1	0	absent	Chromosome	lo7-cs_q30_rye_filter	SECCE7Rv1G0470750.1	Coverage	0
chr7R	123637044	123637902	.	-	PGSB	exon	.	ID=SECCE7Rv1G0470760.1.exon.1;Parent=SECCE7Rv1G0470760.1	SECCE7Rv1G0470760.1	0	absent	Chromosome	lo7-cs_q30_rye_filter	SECCE7Rv1G0470760.1	Coverage	0
chr7R	123899650	123900117	.	+	PGSB	exon	.	ID=SECCE7Rv1G0470770.1.exon.1;Parent=SECCE7Rv1G0470770.1	SECCE7Rv1G0470770.1	457	present	Chromosome	lo7-cs_q30_rye_filter	SECCE7Rv1G0470770.1	Coverage	50.7778
chr7R	123903934	123906580	.	+	PGSB	exon	.	ID=SECCE7Rv1G0470780.1.exon.1;Parent=SECCE7Rv1G0470780.1	SECCE7Rv1G0470780.1	0	absent	Chromosome	lo7-cs_q30_rye_filter	SECCE7Rv1G0470780.1	Coverage	0
chr7R	123907716	123908073	.	+	PGSB	exon	.	ID=SECCE7Rv1G0470790.1.exon.1;Parent=SECCE7Rv1G0470790.1	SECCE7Rv1G0470790.1	0	absent	Chromosome	lo7-cs_q30_rye_filter	SECCE7Rv1G0470790.1	Coverage	0
chr7R	123911149	123911356	.	+	PGSB	exon	.	ID=SECCE7Rv1G0470800.1.exon.1;Parent=SECCE7Rv1G0470800.1	SECCE7Rv1G0470800.1	0	absent	Chromosome	lo7-cs_q30_rye_filter	SECCE7Rv1G0470800.1	Coverage	0
chr7R	124283446	124283623	.	+	PGSB	exon	.	ID=SECCE7Rv1G0470810.1.exon.1;Parent=SECCE7Rv1G0470810.1	SECCE7Rv1G0470810.1	1359	present	Chromosome	lo7-cs_q30_rye_filter	SECCE7Rv1G0470810.1	Coverage	44.3683
chr7R	124405920	124406145	.	-	PGSB	exon	.	ID=SECCE7Rv1G0470820.1.exon.1;Parent=SECCE7Rv1G0470820.1	SECCE7Rv1G0470820.1	768	present	Chromosome	lo7-cs_q30_rye_filter	SECCE7Rv1G0470820.1	Coverage	73.3524
chr7R	124922959	124924395	.	+	PGSB	exon	.	ID=SECCE7Rv1G0470830.1.exon.1;Parent=SECCE7Rv1G0470830.1	SECCE7Rv1G0470830.1	303	present	Chromosome	lo7-cs_q30_rye_filter	SECCE7Rv1G0470830.1	Coverage	11.3995
chr7R	124928109	124929794	.	-	PGSB	exon	.	ID=SECCE7Rv1G0470840.1.exon.1;Parent=SECCE7Rv1G0470840.1	SECCE7Rv1G0470840.1	3084	present	Chromosome	lo7-cs_q30_rye_filter	SECCE7Rv1G0470840.1	Coverage	100
chr7R	125042970	125043579	.	-	PGSB	exon	.	ID=SECCE7Rv1G0470850.1.exon.1;Parent=SECCE7Rv1G0470850.1	SECCE7Rv1G0470850.1	1125	present	Chromosome	lo7-cs_q30_rye_filter	SECCE7Rv1G0470850.1	Coverage	100
chr7R	125054508	125055087	.	-	PGSB	exon	.	ID=SECCE7Rv1G0470860.1.exon.1;Parent=SECCE7Rv1G0470860.1	SECCE7Rv1G0470860.1	2078	present	Chromosome	lo7-cs_q30_rye_filter	SECCE7Rv1G0470860.1	Coverage	96.8765
chr7R	125080684	125081026	.	+	PGSB	exon	.	ID=SECCE7Rv1G0470870.1.exon.1;Parent=SECCE7Rv1G0470870.1	SECCE7Rv1G0470870.1	342	present	Chromosome	lo7-cs_q30_rye_filter	SECCE7Rv1G0470870.1	Coverage	95.7983
chr7R	125083773	125084589	.	-	PGSB	exon	.	ID=SECCE7Rv1G0470880.1.exon.1;Parent=SECCE7Rv1G0470880.1	SECCE7Rv1G0470880.1	816	present	Chromosome	lo7-cs_q30_rye_filter	SECCE7Rv1G0470880.1	Coverage	100
chr7R	125253985	125254216	.	-	PGSB	exon	.	ID=SECCE7Rv1G0470890.1.exon.1;Parent=SECCE7Rv1G0470890.1	SECCE7Rv1G0470890.1	231	present	Chromosome	lo7-cs_q30_rye_filter	SECCE7Rv1G0470890.1	Coverage	100
chr7R	125287882	125287920	.	-	PGSB	exon	.	ID=SECCE7Rv1G0470900.1.exon.1;Parent=SECCE7Rv1G0470900.1	SECCE7Rv1G0470900.1	359	present	Chromosome	lo7-cs_q30_rye_filter	SECCE7Rv1G0470900.1	Coverage	72.0884
chr7R	125318927	125320109	.	-	PGSB	exon	.	ID=SECCE7Rv1G0470910.1.exon.1;Parent=SECCE7Rv1G0470910.1	SECCE7Rv1G0470910.1	770	present	Chromosome	lo7-cs_q30_rye_filter	SECCE7Rv1G0470910.1	Coverage	65.1438
chr7R	125335357	125335699	.	+	PGSB	exon	.	ID=SECCE7Rv1G0470920.1.exon.1;Parent=SECCE7Rv1G0470920.1	SECCE7Rv1G0470920.1	342	present	Chromosome	lo7-cs_q30_rye_filter	SECCE7Rv1G0470920.1	Coverage	100
chr7R	125358703	125359909	.	-	PGSB	exon	.	ID=SECCE7Rv1G0470930.1.exon.1;Parent=SECCE7Rv1G0470930.1	SECCE7Rv1G0470930.1	1090	present	Chromosome	lo7-cs_q30_rye_filter	SECCE7Rv1G0470930.1	Coverage	90.3814
chr7R	125463698	125464880	.	-	PGSB	exon	.	ID=SECCE7Rv1G0470940.1.exon.1;Parent=SECCE7Rv1G0470940.1	SECCE7Rv1G0470940.1	314	present	Chromosome	lo7-cs_q30_rye_filter	SECCE7Rv1G0470940.1	Coverage	26.5651
chr7R	125659984	125661172	.	-	PGSB	exon	.	ID=SECCE7Rv1G0470950.1.exon.1;Parent=SECCE7Rv1G0470950.1	SECCE7Rv1G0470950.1	1123	present	Chromosome	lo7-cs_q30_rye_filter	SECCE7Rv1G0470950.1	Coverage	94.5286
chr7R	125769928	125771110	.	-	PGSB	exon	.	ID=SECCE7Rv1G0470960.1.exon.1;Parent=SECCE7Rv1G0470960.1	SECCE7Rv1G0470960.1	599	present	Chromosome	lo7-cs_q30_rye_filter	SECCE7Rv1G0470960.1	Coverage	50.6768
chr7R	125802675	125803857	.	-	PGSB	exon	.	ID=SECCE7Rv1G0470970.1.exon.1;Parent=SECCE7Rv1G0470970.1	SECCE7Rv1G0470970.1	452	present	Chromosome	lo7-cs_q30_rye_filter	SECCE7Rv1G0470970.1	Coverage	38.2403
chr7R	125815150	125815219	.	-	PGSB	exon	.	ID=SECCE7Rv1G0470980.1.exon.1;Parent=SECCE7Rv1G0470980.1	SECCE7Rv1G0470980.1	208	present	Chromosome	lo7-cs_q30_rye_filter	SECCE7Rv1G0470980.1	Coverage	86.6667
chr7R	125824347	125824443	.	-	PGSB	exon	.	ID=SECCE7Rv1G0470990.1.exon.1;Parent=SECCE7Rv1G0470990.1	SECCE7Rv1G0470990.1	702	present	Chromosome	lo7-cs_q30_rye_filter	SECCE7Rv1G0470990.1	Coverage	71.3415
chr7R	125873345	125874263	.	+	PGSB	exon	.	ID=SECCE7Rv1G0471000.1.exon.1;Parent=SECCE7Rv1G0471000.1	SECCE7Rv1G0471000.1	0	absent	Chromosome	lo7-cs_q30_rye_filter	SECCE7Rv1G0471000.1	Coverage	0
chr7R	125951705	125952752	.	-	PGSB	exon	.	ID=SECCE7Rv1G0471010.1.exon.1;Parent=SECCE7Rv1G0471010.1	SECCE7Rv1G0471010.1	1047	present	Chromosome	lo7-cs_q30_rye_filter	SECCE7Rv1G0471010.1	Coverage	100
chr7R	126159177	126159750	.	-	PGSB	exon	.	ID=SECCE7Rv1G0471020.1.exon.1;Parent=SECCE7Rv1G0471020.1	SECCE7Rv1G0471020.1	573	present	Chromosome	lo7-cs_q30_rye_filter	SECCE7Rv1G0471020.1	Coverage	100
chr7R	126161203	126161542	.	+	PGSB	exon	.	ID=SECCE7Rv1G0471030.1.exon.1;Parent=SECCE7Rv1G0471030.1	SECCE7Rv1G0471030.1	4269	present	Chromosome	lo7-cs_q30_rye_filter	SECCE7Rv1G0471030.1	Coverage	95.8249
chr7R	126170523	126170613	.	+	PGSB	exon	.	ID=SECCE7Rv1G0471040.1.exon.1;Parent=SECCE7Rv1G0471040.1	SECCE7Rv1G0471040.1	714	present	Chromosome	lo7-cs_q30_rye_filter	SECCE7Rv1G0471040.1	Coverage	100
chr7R	126186369	126186431	.	+	PGSB	exon	.	ID=SECCE7Rv1G0471050.1.exon.1;Parent=SECCE7Rv1G0471050.1	SECCE7Rv1G0471050.1	1818	present	Chromosome	lo7-cs_q30_rye_filter	SECCE7Rv1G0471050.1	Coverage	100
chr7R	126658048	126658901	.	-	PGSB	exon	.	ID=SECCE7Rv1G0471060.1.exon.1;Parent=SECCE7Rv1G0471060.1	SECCE7Rv1G0471060.1	1188	present	Chromosome	lo7-cs_q30_rye_filter	SECCE7Rv1G0471060.1	Coverage	100
chr7R	127182545	127182818	.	+	PGSB	exon	.	ID=SECCE7Rv1G0471070.1.exon.1;Parent=SECCE7Rv1G0471070.1	SECCE7Rv1G0471070.1	2453	present	Chromosome	lo7-cs_q30_rye_filter	SECCE7Rv1G0471070.1	Coverage	99.7154
chr7R	127224430	127225318	.	+	PGSB	exon	.	ID=SECCE7Rv1G0471080.1.exon.1;Parent=SECCE7Rv1G0471080.1	SECCE7Rv1G0471080.1	1063	present	Chromosome	lo7-cs_q30_rye_filter	SECCE7Rv1G0471080.1	Coverage	78.047
chr7R	127653415	127654444	.	+	PGSB	exon	.	ID=SECCE7Rv1G0471090.1.exon.1;Parent=SECCE7Rv1G0471090.1	SECCE7Rv1G0471090.1	692	present	Chromosome	lo7-cs_q30_rye_filter	SECCE7Rv1G0471090.1	Coverage	67.2498
chr7R	127789723	127789795	.	-	PGSB	exon	.	ID=SECCE7Rv1G0471100.1.exon.1;Parent=SECCE7Rv1G0471100.1	SECCE7Rv1G0471100.1	727	present	Chromosome	lo7-cs_q30_rye_filter	SECCE7Rv1G0471100.1	Coverage	44.0606
chr7R	127809709	127809934	.	-	PGSB	exon	.	ID=SECCE7Rv1G0471110.1.exon.1;Parent=SECCE7Rv1G0471110.1	SECCE7Rv1G0471110.1	0	absent	Chromosome	lo7-cs_q30_rye_filter	SECCE7Rv1G0471110.1	Coverage	0
chr7R	127811497	127811612	.	-	PGSB	exon	.	ID=SECCE7Rv1G0471120.1.exon.1;Parent=SECCE7Rv1G0471120.1	SECCE7Rv1G0471120.1	457	present	Chromosome	lo7-cs_q30_rye_filter	SECCE7Rv1G0471120.1	Coverage	80.1754
chr7R	128215219	128215395	.	-	PGSB	exon	.	ID=SECCE7Rv1G0471130.1.exon.1;Parent=SECCE7Rv1G0471130.1	SECCE7Rv1G0471130.1	261	present	Chromosome	lo7-cs_q30_rye_filter	SECCE7Rv1G0471130.1	Coverage	100
chr7R	128226906	128227118	.	+	PGSB	exon	.	ID=SECCE7Rv1G0471140.1.exon.1;Parent=SECCE7Rv1G0471140.1	SECCE7Rv1G0471140.1	537	present	Chromosome	lo7-cs_q30_rye_filter	SECCE7Rv1G0471140.1	Coverage	100
chr7R	128232421	128233012	.	-	PGSB	exon	.	ID=SECCE7Rv1G0471150.1.exon.1;Parent=SECCE7Rv1G0471150.1	SECCE7Rv1G0471150.1	1529	present	Chromosome	lo7-cs_q30_rye_filter	SECCE7Rv1G0471150.1	Coverage	82.8726
chr7R	128316405	128317611	.	+	PGSB	exon	.	ID=SECCE7Rv1G0471160.1.exon.1;Parent=SECCE7Rv1G0471160.1	SECCE7Rv1G0471160.1	1206	present	Chromosome	lo7-cs_q30_rye_filter	SECCE7Rv1G0471160.1	Coverage	100
chr7R	128440006	128441182	.	+	PGSB	exon	.	ID=SECCE7Rv1G0471170.1.exon.1;Parent=SECCE7Rv1G0471170.1	SECCE7Rv1G0471170.1	1034	present	Chromosome	lo7-cs_q30_rye_filter	SECCE7Rv1G0471170.1	Coverage	87.9252
chr7R	128561870	128562584	.	+	PGSB	exon	.	ID=SECCE7Rv1G0471180.1.exon.1;Parent=SECCE7Rv1G0471180.1	SECCE7Rv1G0471180.1	714	present	Chromosome	lo7-cs_q30_rye_filter	SECCE7Rv1G0471180.1	Coverage	100
chr7R	128633917	128634268	.	-	PGSB	exon	.	ID=SECCE7Rv1G0471190.1.exon.1;Parent=SECCE7Rv1G0471190.1	SECCE7Rv1G0471190.1	351	present	Chromosome	lo7-cs_q30_rye_filter	SECCE7Rv1G0471190.1	Coverage	100
chr7R	128635834	128637001	.	+	PGSB	exon	.	ID=SECCE7Rv1G0471200.1.exon.1;Parent=SECCE7Rv1G0471200.1	SECCE7Rv1G0471200.1	1003	present	Chromosome	lo7-cs_q30_rye_filter	SECCE7Rv1G0471200.1	Coverage	85.9469
chr7R	128700708	128701884	.	+	PGSB	exon	.	ID=SECCE7Rv1G0471210.1.exon.1;Parent=SECCE7Rv1G0471210.1	SECCE7Rv1G0471210.1	1123	present	Chromosome	lo7-cs_q30_rye_filter	SECCE7Rv1G0471210.1	Coverage	95.4932
chr7R	128732780	128733014	.	+	PGSB	exon	.	ID=SECCE7Rv1G0471220.1.exon.1;Parent=SECCE7Rv1G0471220.1	SECCE7Rv1G0471220.1	831	present	Chromosome	lo7-cs_q30_rye_filter	SECCE7Rv1G0471220.1	Coverage	100
chr7R	128791570	128792182	.	+	PGSB	exon	.	ID=SECCE7Rv1G0471230.1.exon.1;Parent=SECCE7Rv1G0471230.1	SECCE7Rv1G0471230.1	612	present	Chromosome	lo7-cs_q30_rye_filter	SECCE7Rv1G0471230.1	Coverage	100
chr7R	128792443	128793580	.	-	PGSB	exon	.	ID=SECCE7Rv1G0471240.1.exon.1;Parent=SECCE7Rv1G0471240.1	SECCE7Rv1G0471240.1	1137	present	Chromosome	lo7-cs_q30_rye_filter	SECCE7Rv1G0471240.1	Coverage	100
chr7R	128845892	128845921	.	-	PGSB	exon	.	ID=SECCE7Rv1G0471250.1.exon.1;Parent=SECCE7Rv1G0471250.1	SECCE7Rv1G0471250.1	245	present	Chromosome	lo7-cs_q30_rye_filter	SECCE7Rv1G0471250.1	Coverage	22.8758
chr7R	128849232	128849405	.	-	PGSB	exon	.	ID=SECCE7Rv1G0471260.1.exon.1;Parent=SECCE7Rv1G0471260.1	SECCE7Rv1G0471260.1	360	present	Chromosome	lo7-cs_q30_rye_filter	SECCE7Rv1G0471260.1	Coverage	100
chr7R	128860781	128860837	.	-	PGSB	exon	.	ID=SECCE7Rv1G0471270.1.exon.1;Parent=SECCE7Rv1G0471270.1	SECCE7Rv1G0471270.1	0	absent	Chromosome	lo7-cs_q30_rye_filter	SECCE7Rv1G0471270.1	Coverage	0
chr7R	128862031	128862088	.	-	PGSB	exon	.	ID=SECCE7Rv1G0471280.1.exon.1;Parent=SECCE7Rv1G0471280.1	SECCE7Rv1G0471280.1	746	present	Chromosome	lo7-cs_q30_rye_filter	SECCE7Rv1G0471280.1	Coverage	74.6747
chr7R	129065250	129065530	.	+	PGSB	exon	.	ID=SECCE7Rv1G0471290.1.exon.1;Parent=SECCE7Rv1G0471290.1	SECCE7Rv1G0471290.1	1043	present	Chromosome	lo7-cs_q30_rye_filter	SECCE7Rv1G0471290.1	Coverage	88.9173
chr7R	129395677	129397619	.	+	PGSB	exon	.	ID=SECCE7Rv1G0471300.1.exon.1;Parent=SECCE7Rv1G0471300.1	SECCE7Rv1G0471300.1	1654	present	Chromosome	lo7-cs_q30_rye_filter	SECCE7Rv1G0471300.1	Coverage	81.0784
chr7R	129402588	129402878	.	-	PGSB	exon	.	ID=SECCE7Rv1G0471310.1.exon.1;Parent=SECCE7Rv1G0471310.1	SECCE7Rv1G0471310.1	1757	present	Chromosome	lo7-cs_q30_rye_filter	SECCE7Rv1G0471310.1	Coverage	99.2655
chr7R	129484946	129485153	.	-	PGSB	exon	.	ID=SECCE7Rv1G0471320.1.exon.1;Parent=SECCE7Rv1G0471320.1	SECCE7Rv1G0471320.1	1272	present	Chromosome	lo7-cs_q30_rye_filter	SECCE7Rv1G0471320.1	Coverage	81.6956
chr7R	129497615	129498047	.	-	PGSB	exon	.	ID=SECCE7Rv1G0471330.1.exon.1;Parent=SECCE7Rv1G0471330.1	SECCE7Rv1G0471330.1	432	present	Chromosome	lo7-cs_q30_rye_filter	SECCE7Rv1G0471330.1	Coverage	100
chr7R	129536483	129538034	.	+	PGSB	exon	.	ID=SECCE7Rv1G0471340.1.exon.1;Parent=SECCE7Rv1G0471340.1	SECCE7Rv1G0471340.1	199	present	Chromosome	lo7-cs_q30_rye_filter	SECCE7Rv1G0471340.1	Coverage	12.8304
chr7R	129541384	129541712	.	+	PGSB	exon	.	ID=SECCE7Rv1G0471350.1.exon.1;Parent=SECCE7Rv1G0471350.1	SECCE7Rv1G0471350.1	0	absent	Chromosome	lo7-cs_q30_rye_filter	SECCE7Rv1G0471350.1	Coverage	0
chr7R	129564796	129565192	.	+	PGSB	exon	.	ID=SECCE7Rv1G0471360.1.exon.1;Parent=SECCE7Rv1G0471360.1	SECCE7Rv1G0471360.1	576	present	Chromosome	lo7-cs_q30_rye_filter	SECCE7Rv1G0471360.1	Coverage	49.1049
chr7R	129567818	129568088	.	-	PGSB	exon	.	ID=SECCE7Rv1G0471370.1.exon.1;Parent=SECCE7Rv1G0471370.1	SECCE7Rv1G0471370.1	948	present	Chromosome	lo7-cs_q30_rye_filter	SECCE7Rv1G0471370.1	Coverage	100
chr7R	129738565	129739120	.	-	PGSB	exon	.	ID=SECCE7Rv1G0471380.1.exon.1;Parent=SECCE7Rv1G0471380.1	SECCE7Rv1G0471380.1	236	present	Chromosome	lo7-cs_q30_rye_filter	SECCE7Rv1G0471380.1	Coverage	42.5225
chr7R	129746190	129746497	.	-	PGSB	exon	.	ID=SECCE7Rv1G0471390.1.exon.1;Parent=SECCE7Rv1G0471390.1	SECCE7Rv1G0471390.1	2574	present	Chromosome	lo7-cs_q30_rye_filter	SECCE7Rv1G0471390.1	Coverage	100
chr7R	129882039	129882534	.	-	PGSB	exon	.	ID=SECCE7Rv1G0471400.1.exon.1;Parent=SECCE7Rv1G0471400.1	SECCE7Rv1G0471400.1	495	present	Chromosome	lo7-cs_q30_rye_filter	SECCE7Rv1G0471400.1	Coverage	100
chr7R	129957626	129959957	.	+	PGSB	exon	.	ID=SECCE7Rv1G0471410.1.exon.1;Parent=SECCE7Rv1G0471410.1	SECCE7Rv1G0471410.1	4437	present	Chromosome	lo7-cs_q30_rye_filter	SECCE7Rv1G0471410.1	Coverage	100
chr7R	130130141	130130393	.	+	PGSB	exon	.	ID=SECCE7Rv1G0471420.1.exon.1;Parent=SECCE7Rv1G0471420.1	SECCE7Rv1G0471420.1	635	present	Chromosome	lo7-cs_q30_rye_filter	SECCE7Rv1G0471420.1	Coverage	92.029
chr7R	130276982	130277083	.	-	PGSB	exon	.	ID=SECCE7Rv1G0471430.1.exon.1;Parent=SECCE7Rv1G0471430.1	SECCE7Rv1G0471430.1	713	present	Chromosome	lo7-cs_q30_rye_filter	SECCE7Rv1G0471430.1	Coverage	57.1314
chr7R	130402874	130403264	.	+	PGSB	exon	.	ID=SECCE7Rv1G0471440.1.exon.1;Parent=SECCE7Rv1G0471440.1	SECCE7Rv1G0471440.1	356	present	Chromosome	lo7-cs_q30_rye_filter	SECCE7Rv1G0471440.1	Coverage	91.2821
chr7R	130454070	130454101	.	+	PGSB	exon	.	ID=SECCE7Rv1G0471450.1.exon.1;Parent=SECCE7Rv1G0471450.1	SECCE7Rv1G0471450.1	423	present	Chromosome	lo7-cs_q30_rye_filter	SECCE7Rv1G0471450.1	Coverage	100
chr7R	130456950	130457658	.	-	PGSB	exon	.	ID=SECCE7Rv1G0471460.1.exon.1;Parent=SECCE7Rv1G0471460.1	SECCE7Rv1G0471460.1	1761	present	Chromosome	lo7-cs_q30_rye_filter	SECCE7Rv1G0471460.1	Coverage	100
chr7R	130991832	130992108	.	+	PGSB	exon	.	ID=SECCE7Rv1G0471470.1.exon.1;Parent=SECCE7Rv1G0471470.1	SECCE7Rv1G0471470.1	1803	present	Chromosome	lo7-cs_q30_rye_filter	SECCE7Rv1G0471470.1	Coverage	100
chr7R	130999425	130999782	.	-	PGSB	exon	.	ID=SECCE7Rv1G0471480.1.exon.1;Parent=SECCE7Rv1G0471480.1	SECCE7Rv1G0471480.1	357	present	Chromosome	lo7-cs_q30_rye_filter	SECCE7Rv1G0471480.1	Coverage	100
chr7R	131116128	131116479	.	-	PGSB	exon	.	ID=SECCE7Rv1G0471490.1.exon.1;Parent=SECCE7Rv1G0471490.1	SECCE7Rv1G0471490.1	351	present	Chromosome	lo7-cs_q30_rye_filter	SECCE7Rv1G0471490.1	Coverage	100
chr7R	131121468	131121822	.	-	PGSB	exon	.	ID=SECCE7Rv1G0471500.1.exon.1;Parent=SECCE7Rv1G0471500.1	SECCE7Rv1G0471500.1	354	present	Chromosome	lo7-cs_q30_rye_filter	SECCE7Rv1G0471500.1	Coverage	100
chr7R	131377265	131378623	.	-	PGSB	exon	.	ID=SECCE7Rv1G0471510.1.exon.1;Parent=SECCE7Rv1G0471510.1	SECCE7Rv1G0471510.1	2319	present	Chromosome	lo7-cs_q30_rye_filter	SECCE7Rv1G0471510.1	Coverage	100
chr7R	131537271	131538810	.	-	PGSB	exon	.	ID=SECCE7Rv1G0471520.1.exon.1;Parent=SECCE7Rv1G0471520.1	SECCE7Rv1G0471520.1	766	present	Chromosome	lo7-cs_q30_rye_filter	SECCE7Rv1G0471520.1	Coverage	46.6789
chr7R	131564322	131564409	.	+	PGSB	exon	.	ID=SECCE7Rv1G0471530.1.exon.1;Parent=SECCE7Rv1G0471530.1	SECCE7Rv1G0471530.1	502	present	Chromosome	lo7-cs_q30_rye_filter	SECCE7Rv1G0471530.1	Coverage	96.1686
chr7R	131570367	131571603	.	-	PGSB	exon	.	ID=SECCE7Rv1G0471540.1.exon.1;Parent=SECCE7Rv1G0471540.1	SECCE7Rv1G0471540.1	983	present	Chromosome	lo7-cs_q30_rye_filter	SECCE7Rv1G0471540.1	Coverage	79.5307
chr7R	131671012	131671169	.	+	PGSB	exon	.	ID=SECCE7Rv1G0471550.1.exon.1;Parent=SECCE7Rv1G0471550.1	SECCE7Rv1G0471550.1	480	present	Chromosome	lo7-cs_q30_rye_filter	SECCE7Rv1G0471550.1	Coverage	100
chr7R	131673205	131673209	.	-	PGSB	exon	.	ID=SECCE7Rv1G0471560.1.exon.1;Parent=SECCE7Rv1G0471560.1	SECCE7Rv1G0471560.1	3936	present	Chromosome	lo7-cs_q30_rye_filter	SECCE7Rv1G0471560.1	Coverage	99.0189
chr7R	132138840	132139110	.	-	PGSB	exon	.	ID=SECCE7Rv1G0471570.1.exon.1;Parent=SECCE7Rv1G0471570.1	SECCE7Rv1G0471570.1	4299	present	Chromosome	lo7-cs_q30_rye_filter	SECCE7Rv1G0471570.1	Coverage	100
chr7R	132363169	132363538	.	-	PGSB	exon	.	ID=SECCE7Rv1G0471580.1.exon.1;Parent=SECCE7Rv1G0471580.1	SECCE7Rv1G0471580.1	369	present	Chromosome	lo7-cs_q30_rye_filter	SECCE7Rv1G0471580.1	Coverage	100
chr7R	132364824	132365115	.	-	PGSB	exon	.	ID=SECCE7Rv1G0471590.1.exon.1;Parent=SECCE7Rv1G0471590.1	SECCE7Rv1G0471590.1	828	present	Chromosome	lo7-cs_q30_rye_filter	SECCE7Rv1G0471590.1	Coverage	100
chr7R	132382286	132382528	.	+	PGSB	exon	.	ID=SECCE7Rv1G0471600.1.exon.1;Parent=SECCE7Rv1G0471600.1	SECCE7Rv1G0471600.1	381	present	Chromosome	lo7-cs_q30_rye_filter	SECCE7Rv1G0471600.1	Coverage	100
chr7R	132385583	132386240	.	+	PGSB	exon	.	ID=SECCE7Rv1G0471610.1.exon.1;Parent=SECCE7Rv1G0471610.1	SECCE7Rv1G0471610.1	657	present	Chromosome	lo7-cs_q30_rye_filter	SECCE7Rv1G0471610.1	Coverage	100
chr7R	132506982	132507762	.	+	PGSB	exon	.	ID=SECCE7Rv1G0471620.1.exon.1;Parent=SECCE7Rv1G0471620.1	SECCE7Rv1G0471620.1	780	present	Chromosome	lo7-cs_q30_rye_filter	SECCE7Rv1G0471620.1	Coverage	100
chr7R	132512104	132512174	.	+	PGSB	exon	.	ID=SECCE7Rv1G0471630.1.exon.1;Parent=SECCE7Rv1G0471630.1	SECCE7Rv1G0471630.1	764	present	Chromosome	lo7-cs_q30_rye_filter	SECCE7Rv1G0471630.1	Coverage	90.9524
chr7R	132516559	132516657	.	-	PGSB	exon	.	ID=SECCE7Rv1G0471640.1.exon.1;Parent=SECCE7Rv1G0471640.1	SECCE7Rv1G0471640.1	1075	present	Chromosome	lo7-cs_q30_rye_filter	SECCE7Rv1G0471640.1	Coverage	79.6296
chr7R	132525381	132525903	.	+	PGSB	exon	.	ID=SECCE7Rv1G0471650.1.exon.1;Parent=SECCE7Rv1G0471650.1	SECCE7Rv1G0471650.1	0	absent	Chromosome	lo7-cs_q30_rye_filter	SECCE7Rv1G0471650.1	Coverage	0
chr7R	132702206	132704747	.	+	PGSB	exon	.	ID=SECCE7Rv1G0471660.1.exon.1;Parent=SECCE7Rv1G0471660.1	SECCE7Rv1G0471660.1	2109	present	Chromosome	lo7-cs_q30_rye_filter	SECCE7Rv1G0471660.1	Coverage	82.9988
chr7R	132705385	132705574	.	-	PGSB	exon	.	ID=SECCE7Rv1G0471670.1.exon.1;Parent=SECCE7Rv1G0471670.1	SECCE7Rv1G0471670.1	430	present	Chromosome	lo7-cs_q30_rye_filter	SECCE7Rv1G0471670.1	Coverage	45.5026
chr7R	132727130	132728708	.	+	PGSB	exon	.	ID=SECCE7Rv1G0471680.1.exon.1;Parent=SECCE7Rv1G0471680.1	SECCE7Rv1G0471680.1	439	present	Chromosome	lo7-cs_q30_rye_filter	SECCE7Rv1G0471680.1	Coverage	25.1432
chr7R	133128151	133128454	.	+	PGSB	exon	.	ID=SECCE7Rv1G0471690.1.exon.1;Parent=SECCE7Rv1G0471690.1	SECCE7Rv1G0471690.1	173	present	Chromosome	lo7-cs_q30_rye_filter	SECCE7Rv1G0471690.1	Coverage	57.0957
chr7R	133293066	133293369	.	+	PGSB	exon	.	ID=SECCE7Rv1G0471700.1.exon.1;Parent=SECCE7Rv1G0471700.1	SECCE7Rv1G0471700.1	0	absent	Chromosome	lo7-cs_q30_rye_filter	SECCE7Rv1G0471700.1	Coverage	0
chr7R	133312337	133312559	.	+	PGSB	exon	.	ID=SECCE7Rv1G0471710.1.exon.1;Parent=SECCE7Rv1G0471710.1	SECCE7Rv1G0471710.1	1574	present	Chromosome	lo7-cs_q30_rye_filter	SECCE7Rv1G0471710.1	Coverage	97.1605
chr7R	133457255	133457363	.	+	PGSB	exon	.	ID=SECCE7Rv1G0471720.1.exon.1;Parent=SECCE7Rv1G0471720.1	SECCE7Rv1G0471720.1	621	present	Chromosome	lo7-cs_q30_rye_filter	SECCE7Rv1G0471720.1	Coverage	100
chr7R	133676141	133676198	.	+	PGSB	exon	.	ID=SECCE7Rv1G0471730.1.exon.1;Parent=SECCE7Rv1G0471730.1	SECCE7Rv1G0471730.1	591	present	Chromosome	lo7-cs_q30_rye_filter	SECCE7Rv1G0471730.1	Coverage	37.4525
chr7R	133683445	133683742	.	-	PGSB	exon	.	ID=SECCE7Rv1G0471740.1.exon.1;Parent=SECCE7Rv1G0471740.1	SECCE7Rv1G0471740.1	1707	present	Chromosome	lo7-cs_q30_rye_filter	SECCE7Rv1G0471740.1	Coverage	100
chr7R	133857824	133857915	.	-	PGSB	exon	.	ID=SECCE7Rv1G0471750.1.exon.1;Parent=SECCE7Rv1G0471750.1	SECCE7Rv1G0471750.1	990	present	Chromosome	lo7-cs_q30_rye_filter	SECCE7Rv1G0471750.1	Coverage	100
chr7R	133874844	133876083	.	-	PGSB	exon	.	ID=SECCE7Rv1G0471760.1.exon.1;Parent=SECCE7Rv1G0471760.1	SECCE7Rv1G0471760.1	1216	present	Chromosome	lo7-cs_q30_rye_filter	SECCE7Rv1G0471760.1	Coverage	98.1437
chr7R	133918280	133919744	.	+	PGSB	exon	.	ID=SECCE7Rv1G0471770.1.exon.1;Parent=SECCE7Rv1G0471770.1	SECCE7Rv1G0471770.1	1158	present	Chromosome	lo7-cs_q30_rye_filter	SECCE7Rv1G0471770.1	Coverage	79.0984
chr7R	133925168	133925606	.	+	PGSB	exon	.	ID=SECCE7Rv1G0471780.1.exon.1;Parent=SECCE7Rv1G0471780.1	SECCE7Rv1G0471780.1	438	present	Chromosome	lo7-cs_q30_rye_filter	SECCE7Rv1G0471780.1	Coverage	100
chr7R	134016997	134018364	.	+	PGSB	exon	.	ID=SECCE7Rv1G0471790.1.exon.1;Parent=SECCE7Rv1G0471790.1	SECCE7Rv1G0471790.1	1451	present	Chromosome	lo7-cs_q30_rye_filter	SECCE7Rv1G0471790.1	Coverage	99.3155
chr7R	134023464	134023563	.	+	PGSB	exon	.	ID=SECCE7Rv1G0471800.1.exon.1;Parent=SECCE7Rv1G0471800.1	SECCE7Rv1G0471800.1	190	present	Chromosome	lo7-cs_q30_rye_filter	SECCE7Rv1G0471800.1	Coverage	24.0811
chr7R	134029165	134029333	.	+	PGSB	exon	.	ID=SECCE7Rv1G0471810.1.exon.1;Parent=SECCE7Rv1G0471810.1	SECCE7Rv1G0471810.1	760	present	Chromosome	lo7-cs_q30_rye_filter	SECCE7Rv1G0471810.1	Coverage	87.0561
chr7R	134032115	134032541	.	-	PGSB	exon	.	ID=SECCE7Rv1G0471820.1.exon.1;Parent=SECCE7Rv1G0471820.1	SECCE7Rv1G0471820.1	426	present	Chromosome	lo7-cs_q30_rye_filter	SECCE7Rv1G0471820.1	Coverage	100
chr7R	134048282	134048479	.	-	PGSB	exon	.	ID=SECCE7Rv1G0471830.1.exon.1;Parent=SECCE7Rv1G0471830.1	SECCE7Rv1G0471830.1	591	present	Chromosome	lo7-cs_q30_rye_filter	SECCE7Rv1G0471830.1	Coverage	100
chr7R	134071501	134072701	.	+	PGSB	exon	.	ID=SECCE7Rv1G0471840.1.exon.1;Parent=SECCE7Rv1G0471840.1	SECCE7Rv1G0471840.1	1200	present	Chromosome	lo7-cs_q30_rye_filter	SECCE7Rv1G0471840.1	Coverage	100
chr7R	134094921	134094984	.	+	PGSB	exon	.	ID=SECCE7Rv1G0471850.1.exon.1;Parent=SECCE7Rv1G0471850.1	SECCE7Rv1G0471850.1	796	present	Chromosome	lo7-cs_q30_rye_filter	SECCE7Rv1G0471850.1	Coverage	99.005
chr7R	134252172	134252508	.	+	PGSB	exon	.	ID=SECCE7Rv1G0471860.1.exon.1;Parent=SECCE7Rv1G0471860.1	SECCE7Rv1G0471860.1	725	present	Chromosome	lo7-cs_q30_rye_filter	SECCE7Rv1G0471860.1	Coverage	96.6667
chr7R	134258912	134259146	.	+	PGSB	exon	.	ID=SECCE7Rv1G0471870.1.exon.1;Parent=SECCE7Rv1G0471870.1	SECCE7Rv1G0471870.1	234	present	Chromosome	lo7-cs_q30_rye_filter	SECCE7Rv1G0471870.1	Coverage	100
chr7R	134326722	134327334	.	+	PGSB	exon	.	ID=SECCE7Rv1G0471880.1.exon.1;Parent=SECCE7Rv1G0471880.1	SECCE7Rv1G0471880.1	1077	present	Chromosome	lo7-cs_q30_rye_filter	SECCE7Rv1G0471880.1	Coverage	100
chr7R	134332902	134333220	.	+	PGSB	exon	.	ID=SECCE7Rv1G0471890.1.exon.1;Parent=SECCE7Rv1G0471890.1	SECCE7Rv1G0471890.1	318	present	Chromosome	lo7-cs_q30_rye_filter	SECCE7Rv1G0471890.1	Coverage	100
chr7R	134484660	134485544	.	+	PGSB	exon	.	ID=SECCE7Rv1G0471900.1.exon.1;Parent=SECCE7Rv1G0471900.1	SECCE7Rv1G0471900.1	1145	present	Chromosome	lo7-cs_q30_rye_filter	SECCE7Rv1G0471900.1	Coverage	77.7325
chr7R	134488809	134489478	.	+	PGSB	exon	.	ID=SECCE7Rv1G0471910.1.exon.1;Parent=SECCE7Rv1G0471910.1	SECCE7Rv1G0471910.1	1214	present	Chromosome	lo7-cs_q30_rye_filter	SECCE7Rv1G0471910.1	Coverage	76.2084
chr7R	134508397	134508404	.	-	PGSB	exon	.	ID=SECCE7Rv1G0471920.1.exon.1;Parent=SECCE7Rv1G0471920.1	SECCE7Rv1G0471920.1	0	absent	Chromosome	lo7-cs_q30_rye_filter	SECCE7Rv1G0471920.1	Coverage	0
chr7R	134512531	134515636	.	-	PGSB	exon	.	ID=SECCE7Rv1G0471930.1.exon.1;Parent=SECCE7Rv1G0471930.1	SECCE7Rv1G0471930.1	41	absent	Chromosome	lo7-cs_q30_rye_filter	SECCE7Rv1G0471930.1	Coverage	1.00564
chr7R	134536619	134536794	.	-	PGSB	exon	.	ID=SECCE7Rv1G0471940.1.exon.1;Parent=SECCE7Rv1G0471940.1	SECCE7Rv1G0471940.1	1521	present	Chromosome	lo7-cs_q30_rye_filter	SECCE7Rv1G0471940.1	Coverage	98.8304
chr7R	134744943	134745177	.	-	PGSB	exon	.	ID=SECCE7Rv1G0471950.1.exon.1;Parent=SECCE7Rv1G0471950.1	SECCE7Rv1G0471950.1	234	present	Chromosome	lo7-cs_q30_rye_filter	SECCE7Rv1G0471950.1	Coverage	100
chr7R	134956553	134956728	.	-	PGSB	exon	.	ID=SECCE7Rv1G0471960.1.exon.1;Parent=SECCE7Rv1G0471960.1	SECCE7Rv1G0471960.1	956	present	Chromosome	lo7-cs_q30_rye_filter	SECCE7Rv1G0471960.1	Coverage	91.0476
chr7R	134973986	134974328	.	-	PGSB	exon	.	ID=SECCE7Rv1G0471970.1.exon.1;Parent=SECCE7Rv1G0471970.1	SECCE7Rv1G0471970.1	0	absent	Chromosome	lo7-cs_q30_rye_filter	SECCE7Rv1G0471970.1	Coverage	0
chr7R	135050695	135051310	.	-	PGSB	exon	.	ID=SECCE7Rv1G0471980.1.exon.1;Parent=SECCE7Rv1G0471980.1	SECCE7Rv1G0471980.1	347	present	Chromosome	lo7-cs_q30_rye_filter	SECCE7Rv1G0471980.1	Coverage	56.4228
chr7R	135197508	135197852	.	+	PGSB	exon	.	ID=SECCE7Rv1G0471990.1.exon.1;Parent=SECCE7Rv1G0471990.1	SECCE7Rv1G0471990.1	922	present	Chromosome	lo7-cs_q30_rye_filter	SECCE7Rv1G0471990.1	Coverage	64.5658
chr7R	135222617	135222705	.	+	PGSB	exon	.	ID=SECCE7Rv1G0472000.1.exon.1;Parent=SECCE7Rv1G0472000.1	SECCE7Rv1G0472000.1	0	absent	Chromosome	lo7-cs_q30_rye_filter	SECCE7Rv1G0472000.1	Coverage	0
chr7R	135627166	135628405	.	+	PGSB	exon	.	ID=SECCE7Rv1G0472010.1.exon.1;Parent=SECCE7Rv1G0472010.1	SECCE7Rv1G0472010.1	1185	present	Chromosome	lo7-cs_q30_rye_filter	SECCE7Rv1G0472010.1	Coverage	95.6416
chr7R	135682919	135683140	.	+	PGSB	exon	.	ID=SECCE7Rv1G0472020.1.exon.1;Parent=SECCE7Rv1G0472020.1	SECCE7Rv1G0472020.1	864	present	Chromosome	lo7-cs_q30_rye_filter	SECCE7Rv1G0472020.1	Coverage	97.6271
chr7R	135695498	135697706	.	+	PGSB	exon	.	ID=SECCE7Rv1G0472030.1.exon.1;Parent=SECCE7Rv1G0472030.1	SECCE7Rv1G0472030.1	4612	present	Chromosome	lo7-cs_q30_rye_filter	SECCE7Rv1G0472030.1	Coverage	99.8917
chr7R	135732136	135732910	.	+	PGSB	exon	.	ID=SECCE7Rv1G0472040.1.exon.1;Parent=SECCE7Rv1G0472040.1	SECCE7Rv1G0472040.1	774	present	Chromosome	lo7-cs_q30_rye_filter	SECCE7Rv1G0472040.1	Coverage	100
chr7R	135983709	135983790	.	-	PGSB	exon	.	ID=SECCE7Rv1G0472050.1.exon.1;Parent=SECCE7Rv1G0472050.1	SECCE7Rv1G0472050.1	5337	present	Chromosome	lo7-cs_q30_rye_filter	SECCE7Rv1G0472050.1	Coverage	85.57
chr7R	136465025	136465130	.	+	PGSB	exon	.	ID=SECCE7Rv1G0472060.1.exon.1;Parent=SECCE7Rv1G0472060.1	SECCE7Rv1G0472060.1	3004	present	Chromosome	lo7-cs_q30_rye_filter	SECCE7Rv1G0472060.1	Coverage	96.3747
chr7R	136685464	136685484	.	+	PGSB	exon	.	ID=SECCE7Rv1G0472070.1.exon.1;Parent=SECCE7Rv1G0472070.1	SECCE7Rv1G0472070.1	0	absent	Chromosome	lo7-cs_q30_rye_filter	SECCE7Rv1G0472070.1	Coverage	0
chr7R	136711713	136711812	.	-	PGSB	exon	.	ID=SECCE7Rv1G0472080.1.exon.1;Parent=SECCE7Rv1G0472080.1	SECCE7Rv1G0472080.1	1130	present	Chromosome	lo7-cs_q30_rye_filter	SECCE7Rv1G0472080.1	Coverage	83.1494
chr7R	136724957	136726633	.	+	PGSB	exon	.	ID=SECCE7Rv1G0472090.1.exon.1;Parent=SECCE7Rv1G0472090.1	SECCE7Rv1G0472090.1	0	absent	Chromosome	lo7-cs_q30_rye_filter	SECCE7Rv1G0472090.1	Coverage	0
chr7R	136732350	136732578	.	-	PGSB	exon	.	ID=SECCE7Rv1G0472100.1.exon.1;Parent=SECCE7Rv1G0472100.1	SECCE7Rv1G0472100.1	0	absent	Chromosome	lo7-cs_q30_rye_filter	SECCE7Rv1G0472100.1	Coverage	0
chr7R	136764851	136765112	.	+	PGSB	exon	.	ID=SECCE7Rv1G0472110.1.exon.1;Parent=SECCE7Rv1G0472110.1	SECCE7Rv1G0472110.1	261	present	Chromosome	lo7-cs_q30_rye_filter	SECCE7Rv1G0472110.1	Coverage	100
chr7R	136915853	136916301	.	+	PGSB	exon	.	ID=SECCE7Rv1G0472120.1.exon.1;Parent=SECCE7Rv1G0472120.1	SECCE7Rv1G0472120.1	125	present	Chromosome	lo7-cs_q30_rye_filter	SECCE7Rv1G0472120.1	Coverage	27.9018
chr7R	137473667	137473726	.	+	PGSB	exon	.	ID=SECCE7Rv1G0472130.1.exon.1;Parent=SECCE7Rv1G0472130.1	SECCE7Rv1G0472130.1	1817	present	Chromosome	lo7-cs_q30_rye_filter	SECCE7Rv1G0472130.1	Coverage	96.1376
chr7R	137480812	137480998	.	+	PGSB	exon	.	ID=SECCE7Rv1G0472140.1.exon.1;Parent=SECCE7Rv1G0472140.1	SECCE7Rv1G0472140.1	1554	present	Chromosome	lo7-cs_q30_rye_filter	SECCE7Rv1G0472140.1	Coverage	83.8188
chr7R	137787055	137787524	.	+	PGSB	exon	.	ID=SECCE7Rv1G0472150.1.exon.1;Parent=SECCE7Rv1G0472150.1	SECCE7Rv1G0472150.1	948	present	Chromosome	lo7-cs_q30_rye_filter	SECCE7Rv1G0472150.1	Coverage	80
chr7R	137795108	137795303	.	-	PGSB	exon	.	ID=SECCE7Rv1G0472160.1.exon.1;Parent=SECCE7Rv1G0472160.1	SECCE7Rv1G0472160.1	1869	present	Chromosome	lo7-cs_q30_rye_filter	SECCE7Rv1G0472160.1	Coverage	100
chr7R	138059362	138059745	.	-	PGSB	exon	.	ID=SECCE7Rv1G0472170.1.exon.1;Parent=SECCE7Rv1G0472170.1	SECCE7Rv1G0472170.1	768	present	Chromosome	lo7-cs_q30_rye_filter	SECCE7Rv1G0472170.1	Coverage	100
chr7R	138071360	138071892	.	-	PGSB	exon	.	ID=SECCE7Rv1G0472180.1.exon.1;Parent=SECCE7Rv1G0472180.1	SECCE7Rv1G0472180.1	1431	present	Chromosome	lo7-cs_q30_rye_filter	SECCE7Rv1G0472180.1	Coverage	100
chr7R	138095777	138095922	.	+	PGSB	exon	.	ID=SECCE7Rv1G0472190.1.exon.1;Parent=SECCE7Rv1G0472190.1	SECCE7Rv1G0472190.1	780	present	Chromosome	lo7-cs_q30_rye_filter	SECCE7Rv1G0472190.1	Coverage	100
chr7R	138098824	138099559	.	+	PGSB	exon	.	ID=SECCE7Rv1G0472200.1.exon.1;Parent=SECCE7Rv1G0472200.1	SECCE7Rv1G0472200.1	735	present	Chromosome	lo7-cs_q30_rye_filter	SECCE7Rv1G0472200.1	Coverage	100
chr7R	138219517	138219652	.	+	PGSB	exon	.	ID=SECCE7Rv1G0472210.1.exon.1;Parent=SECCE7Rv1G0472210.1	SECCE7Rv1G0472210.1	1038	present	Chromosome	lo7-cs_q30_rye_filter	SECCE7Rv1G0472210.1	Coverage	100
chr7R	138237394	138238486	.	-	PGSB	exon	.	ID=SECCE7Rv1G0472220.1.exon.1;Parent=SECCE7Rv1G0472220.1	SECCE7Rv1G0472220.1	1120	present	Chromosome	lo7-cs_q30_rye_filter	SECCE7Rv1G0472220.1	Coverage	99.8217
chr7R	138275250	138275534	.	+	PGSB	exon	.	ID=SECCE7Rv1G0472230.1.exon.1;Parent=SECCE7Rv1G0472230.1	SECCE7Rv1G0472230.1	685	present	Chromosome	lo7-cs_q30_rye_filter	SECCE7Rv1G0472230.1	Coverage	95.9384
chr7R	139348354	139348432	.	+	PGSB	exon	.	ID=SECCE7Rv1G0472240.1.exon.1;Parent=SECCE7Rv1G0472240.1	SECCE7Rv1G0472240.1	603	present	Chromosome	lo7-cs_q30_rye_filter	SECCE7Rv1G0472240.1	Coverage	100
chr7R	139740868	139740965	.	-	PGSB	exon	.	ID=SECCE7Rv1G0472250.1.exon.1;Parent=SECCE7Rv1G0472250.1	SECCE7Rv1G0472250.1	747	present	Chromosome	lo7-cs_q30_rye_filter	SECCE7Rv1G0472250.1	Coverage	100
chr7R	140041731	140041822	.	-	PGSB	exon	.	ID=SECCE7Rv1G0472260.1.exon.1;Parent=SECCE7Rv1G0472260.1	SECCE7Rv1G0472260.1	717	present	Chromosome	lo7-cs_q30_rye_filter	SECCE7Rv1G0472260.1	Coverage	100
chr7R	140450854	140450922	.	+	PGSB	exon	.	ID=SECCE7Rv1G0472270.1.exon.1;Parent=SECCE7Rv1G0472270.1	SECCE7Rv1G0472270.1	1430	present	Chromosome	lo7-cs_q30_rye_filter	SECCE7Rv1G0472270.1	Coverage	99.3056
chr7R	140602561	140602639	.	-	PGSB	exon	.	ID=SECCE7Rv1G0472280.1.exon.1;Parent=SECCE7Rv1G0472280.1	SECCE7Rv1G0472280.1	753	present	Chromosome	lo7-cs_q30_rye_filter	SECCE7Rv1G0472280.1	Coverage	100
chr7R	140604186	140604417	.	-	PGSB	exon	.	ID=SECCE7Rv1G0472290.1.exon.1;Parent=SECCE7Rv1G0472290.1	SECCE7Rv1G0472290.1	2394	present	Chromosome	lo7-cs_q30_rye_filter	SECCE7Rv1G0472290.1	Coverage	100
chr7R	140685632	140685738	.	+	PGSB	exon	.	ID=SECCE7Rv1G0472300.1.exon.1;Parent=SECCE7Rv1G0472300.1	SECCE7Rv1G0472300.1	1578	present	Chromosome	lo7-cs_q30_rye_filter	SECCE7Rv1G0472300.1	Coverage	100
chr7R	140691822	140692040	.	-	PGSB	exon	.	ID=SECCE7Rv1G0472310.1.exon.1;Parent=SECCE7Rv1G0472310.1	SECCE7Rv1G0472310.1	279	present	Chromosome	lo7-cs_q30_rye_filter	SECCE7Rv1G0472310.1	Coverage	100
chr7R	140726579	140726768	.	+	PGSB	exon	.	ID=SECCE7Rv1G0472320.1.exon.1;Parent=SECCE7Rv1G0472320.1	SECCE7Rv1G0472320.1	999	present	Chromosome	lo7-cs_q30_rye_filter	SECCE7Rv1G0472320.1	Coverage	100
chr7R	141124020	141124236	.	+	PGSB	exon	.	ID=SECCE7Rv1G0472330.1.exon.1;Parent=SECCE7Rv1G0472330.1	SECCE7Rv1G0472330.1	1320	present	Chromosome	lo7-cs_q30_rye_filter	SECCE7Rv1G0472330.1	Coverage	100
chr7R	141127949	141130013	.	-	PGSB	exon	.	ID=SECCE7Rv1G0472340.1.exon.1;Parent=SECCE7Rv1G0472340.1	SECCE7Rv1G0472340.1	1792	present	Chromosome	lo7-cs_q30_rye_filter	SECCE7Rv1G0472340.1	Coverage	86.8217
chr7R	141134147	141134285	.	+	PGSB	exon	.	ID=SECCE7Rv1G0472350.1.exon.1;Parent=SECCE7Rv1G0472350.1	SECCE7Rv1G0472350.1	531	present	Chromosome	lo7-cs_q30_rye_filter	SECCE7Rv1G0472350.1	Coverage	100
chr7R	141482593	141482605	.	-	PGSB	exon	.	ID=SECCE7Rv1G0472360.1.exon.1;Parent=SECCE7Rv1G0472360.1	SECCE7Rv1G0472360.1	297	present	Chromosome	lo7-cs_q30_rye_filter	SECCE7Rv1G0472360.1	Coverage	100
chr7R	141595011	141596586	.	+	PGSB	exon	.	ID=SECCE7Rv1G0472370.1.exon.1;Parent=SECCE7Rv1G0472370.1	SECCE7Rv1G0472370.1	1575	present	Chromosome	lo7-cs_q30_rye_filter	SECCE7Rv1G0472370.1	Coverage	100
chr7R	141599980	141601171	.	-	PGSB	exon	.	ID=SECCE7Rv1G0472380.1.exon.1;Parent=SECCE7Rv1G0472380.1	SECCE7Rv1G0472380.1	1191	present	Chromosome	lo7-cs_q30_rye_filter	SECCE7Rv1G0472380.1	Coverage	100
chr7R	141636857	141637163	.	-	PGSB	exon	.	ID=SECCE7Rv1G0472390.1.exon.1;Parent=SECCE7Rv1G0472390.1	SECCE7Rv1G0472390.1	1029	present	Chromosome	lo7-cs_q30_rye_filter	SECCE7Rv1G0472390.1	Coverage	100
chr7R	141653896	141654109	.	+	PGSB	exon	.	ID=SECCE7Rv1G0472400.1.exon.1;Parent=SECCE7Rv1G0472400.1	SECCE7Rv1G0472400.1	1440	present	Chromosome	lo7-cs_q30_rye_filter	SECCE7Rv1G0472400.1	Coverage	100
chr7R	141969860	141973010	.	+	PGSB	exon	.	ID=SECCE7Rv1G0472410.1.exon.1;Parent=SECCE7Rv1G0472410.1	SECCE7Rv1G0472410.1	1584	present	Chromosome	lo7-cs_q30_rye_filter	SECCE7Rv1G0472410.1	Coverage	36.4389
chr7R	141976370	141976413	.	-	PGSB	exon	.	ID=SECCE7Rv1G0472420.1.exon.1;Parent=SECCE7Rv1G0472420.1	SECCE7Rv1G0472420.1	1189	present	Chromosome	lo7-cs_q30_rye_filter	SECCE7Rv1G0472420.1	Coverage	71.4114
chr7R	142391938	142392163	.	+	PGSB	exon	.	ID=SECCE7Rv1G0472430.1.exon.1;Parent=SECCE7Rv1G0472430.1	SECCE7Rv1G0472430.1	1150	present	Chromosome	lo7-cs_q30_rye_filter	SECCE7Rv1G0472430.1	Coverage	88.3257
chr7R	142429285	142429708	.	+	PGSB	exon	.	ID=SECCE7Rv1G0472440.1.exon.1;Parent=SECCE7Rv1G0472440.1	SECCE7Rv1G0472440.1	1347	present	Chromosome	lo7-cs_q30_rye_filter	SECCE7Rv1G0472440.1	Coverage	82.9945
chr7R	142434397	142434766	.	-	PGSB	exon	.	ID=SECCE7Rv1G0472450.1.exon.1;Parent=SECCE7Rv1G0472450.1	SECCE7Rv1G0472450.1	340	present	Chromosome	lo7-cs_q30_rye_filter	SECCE7Rv1G0472450.1	Coverage	92.1409
chr7R	142911294	142914877	.	+	PGSB	exon	.	ID=SECCE7Rv1G0472460.1.exon.1;Parent=SECCE7Rv1G0472460.1	SECCE7Rv1G0472460.1	3933	present	Chromosome	lo7-cs_q30_rye_filter	SECCE7Rv1G0472460.1	Coverage	94.8625
chr7R	143007476	143007821	.	-	PGSB	exon	.	ID=SECCE7Rv1G0472470.1.exon.1;Parent=SECCE7Rv1G0472470.1	SECCE7Rv1G0472470.1	0	absent	Chromosome	lo7-cs_q30_rye_filter	SECCE7Rv1G0472470.1	Coverage	0
chr7R	143008533	143008941	.	-	PGSB	exon	.	ID=SECCE7Rv1G0472480.1.exon.1;Parent=SECCE7Rv1G0472480.1	SECCE7Rv1G0472480.1	345	present	Chromosome	lo7-cs_q30_rye_filter	SECCE7Rv1G0472480.1	Coverage	84.5588
chr7R	143187696	143188779	.	-	PGSB	exon	.	ID=SECCE7Rv1G0472490.1.exon.1;Parent=SECCE7Rv1G0472490.1	SECCE7Rv1G0472490.1	1484	present	Chromosome	lo7-cs_q30_rye_filter	SECCE7Rv1G0472490.1	Coverage	96.4263
chr7R	143196542	143196848	.	-	PGSB	exon	.	ID=SECCE7Rv1G0472500.1.exon.1;Parent=SECCE7Rv1G0472500.1	SECCE7Rv1G0472500.1	0	absent	Chromosome	lo7-cs_q30_rye_filter	SECCE7Rv1G0472500.1	Coverage	0
chr7R	143325392	143327135	.	-	PGSB	exon	.	ID=SECCE7Rv1G0472510.1.exon.1;Parent=SECCE7Rv1G0472510.1	SECCE7Rv1G0472510.1	1274	present	Chromosome	lo7-cs_q30_rye_filter	SECCE7Rv1G0472510.1	Coverage	73.0924
chr7R	143756071	143756182	.	+	PGSB	exon	.	ID=SECCE7Rv1G0472520.1.exon.1;Parent=SECCE7Rv1G0472520.1	SECCE7Rv1G0472520.1	902	present	Chromosome	lo7-cs_q30_rye_filter	SECCE7Rv1G0472520.1	Coverage	66.0806
chr7R	143766503	143766866	.	-	PGSB	exon	.	ID=SECCE7Rv1G0472530.1.exon.1;Parent=SECCE7Rv1G0472530.1	SECCE7Rv1G0472530.1	363	present	Chromosome	lo7-cs_q30_rye_filter	SECCE7Rv1G0472530.1	Coverage	100
chr7R	143770568	143770678	.	-	PGSB	exon	.	ID=SECCE7Rv1G0472540.1.exon.1;Parent=SECCE7Rv1G0472540.1	SECCE7Rv1G0472540.1	110	present	Chromosome	lo7-cs_q30_rye_filter	SECCE7Rv1G0472540.1	Coverage	50.9259
chr7R	143772933	143774148	.	-	PGSB	exon	.	ID=SECCE7Rv1G0472550.1.exon.1;Parent=SECCE7Rv1G0472550.1	SECCE7Rv1G0472550.1	0	absent	Chromosome	lo7-cs_q30_rye_filter	SECCE7Rv1G0472550.1	Coverage	0
chr7R	144142404	144142717	.	-	PGSB	exon	.	ID=SECCE7Rv1G0472560.1.exon.1;Parent=SECCE7Rv1G0472560.1	SECCE7Rv1G0472560.1	0	absent	Chromosome	lo7-cs_q30_rye_filter	SECCE7Rv1G0472560.1	Coverage	0
chr7R	144224342	144224774	.	-	PGSB	exon	.	ID=SECCE7Rv1G0472570.1.exon.1;Parent=SECCE7Rv1G0472570.1	SECCE7Rv1G0472570.1	0	absent	Chromosome	lo7-cs_q30_rye_filter	SECCE7Rv1G0472570.1	Coverage	0
chr7R	144420879	144421001	.	+	PGSB	exon	.	ID=SECCE7Rv1G0472580.1.exon.1;Parent=SECCE7Rv1G0472580.1	SECCE7Rv1G0472580.1	0	absent	Chromosome	lo7-cs_q30_rye_filter	SECCE7Rv1G0472580.1	Coverage	0
chr7R	144428006	144428427	.	+	PGSB	exon	.	ID=SECCE7Rv1G0472590.1.exon.1;Parent=SECCE7Rv1G0472590.1	SECCE7Rv1G0472590.1	0	absent	Chromosome	lo7-cs_q30_rye_filter	SECCE7Rv1G0472590.1	Coverage	0
chr7R	144440049	144440823	.	-	PGSB	exon	.	ID=SECCE7Rv1G0472600.1.exon.1;Parent=SECCE7Rv1G0472600.1	SECCE7Rv1G0472600.1	0	absent	Chromosome	lo7-cs_q30_rye_filter	SECCE7Rv1G0472600.1	Coverage	0
chr7R	144653538	144653569	.	-	PGSB	exon	.	ID=SECCE7Rv1G0472610.1.exon.1;Parent=SECCE7Rv1G0472610.1	SECCE7Rv1G0472610.1	0	absent	Chromosome	lo7-cs_q30_rye_filter	SECCE7Rv1G0472610.1	Coverage	0
chr7R	144883401	144883557	.	+	PGSB	exon	.	ID=SECCE7Rv1G0472620.1.exon.1;Parent=SECCE7Rv1G0472620.1	SECCE7Rv1G0472620.1	975	present	Chromosome	lo7-cs_q30_rye_filter	SECCE7Rv1G0472620.1	Coverage	100
chr7R	144932320	144932572	.	-	PGSB	exon	.	ID=SECCE7Rv1G0472630.1.exon.1;Parent=SECCE7Rv1G0472630.1	SECCE7Rv1G0472630.1	2442	present	Chromosome	lo7-cs_q30_rye_filter	SECCE7Rv1G0472630.1	Coverage	100
chr7R	145380885	145380952	.	+	PGSB	exon	.	ID=SECCE7Rv1G0472640.1.exon.1;Parent=SECCE7Rv1G0472640.1	SECCE7Rv1G0472640.1	1503	present	Chromosome	lo7-cs_q30_rye_filter	SECCE7Rv1G0472640.1	Coverage	100
chr7R	145803940	145804144	.	+	PGSB	exon	.	ID=SECCE7Rv1G0472650.1.exon.1;Parent=SECCE7Rv1G0472650.1	SECCE7Rv1G0472650.1	204	present	Chromosome	lo7-cs_q30_rye_filter	SECCE7Rv1G0472650.1	Coverage	100
chr7R	146059511	146060579	.	+	PGSB	exon	.	ID=SECCE7Rv1G0472660.1.exon.1;Parent=SECCE7Rv1G0472660.1	SECCE7Rv1G0472660.1	1068	present	Chromosome	lo7-cs_q30_rye_filter	SECCE7Rv1G0472660.1	Coverage	100
chr7R	146064247	146065273	.	+	PGSB	exon	.	ID=SECCE7Rv1G0472670.1.exon.1;Parent=SECCE7Rv1G0472670.1	SECCE7Rv1G0472670.1	1026	present	Chromosome	lo7-cs_q30_rye_filter	SECCE7Rv1G0472670.1	Coverage	100
chr7R	146566483	146566938	.	+	PGSB	exon	.	ID=SECCE7Rv1G0472680.1.exon.1;Parent=SECCE7Rv1G0472680.1	SECCE7Rv1G0472680.1	486	present	Chromosome	lo7-cs_q30_rye_filter	SECCE7Rv1G0472680.1	Coverage	100
chr7R	146567830	146568118	.	+	PGSB	exon	.	ID=SECCE7Rv1G0472690.1.exon.1;Parent=SECCE7Rv1G0472690.1	SECCE7Rv1G0472690.1	363	present	Chromosome	lo7-cs_q30_rye_filter	SECCE7Rv1G0472690.1	Coverage	100
chr7R	146765555	146766272	.	+	PGSB	exon	.	ID=SECCE7Rv1G0472700.1.exon.1;Parent=SECCE7Rv1G0472700.1	SECCE7Rv1G0472700.1	0	absent	Chromosome	lo7-cs_q30_rye_filter	SECCE7Rv1G0472700.1	Coverage	0
chr7R	146773608	146773830	.	-	PGSB	exon	.	ID=SECCE7Rv1G0472710.1.exon.1;Parent=SECCE7Rv1G0472710.1	SECCE7Rv1G0472710.1	795	present	Chromosome	lo7-cs_q30_rye_filter	SECCE7Rv1G0472710.1	Coverage	100
chr7R	146781493	146782182	.	-	PGSB	exon	.	ID=SECCE7Rv1G0472720.1.exon.1;Parent=SECCE7Rv1G0472720.1	SECCE7Rv1G0472720.1	864	present	Chromosome	lo7-cs_q30_rye_filter	SECCE7Rv1G0472720.1	Coverage	66.2069
chr7R	147104825	147105257	.	+	PGSB	exon	.	ID=SECCE7Rv1G0472730.1.exon.1;Parent=SECCE7Rv1G0472730.1	SECCE7Rv1G0472730.1	432	present	Chromosome	lo7-cs_q30_rye_filter	SECCE7Rv1G0472730.1	Coverage	100
chr7R	147158821	147159653	.	+	PGSB	exon	.	ID=SECCE7Rv1G0472740.1.exon.1;Parent=SECCE7Rv1G0472740.1	SECCE7Rv1G0472740.1	1395	present	Chromosome	lo7-cs_q30_rye_filter	SECCE7Rv1G0472740.1	Coverage	77.6294
chr7R	147163785	147163898	.	+	PGSB	exon	.	ID=SECCE7Rv1G0472750.1.exon.1;Parent=SECCE7Rv1G0472750.1	SECCE7Rv1G0472750.1	167	present	Chromosome	lo7-cs_q30_rye_filter	SECCE7Rv1G0472750.1	Coverage	12.3704
chr7R	147577855	147579070	.	+	PGSB	exon	.	ID=SECCE7Rv1G0472760.1.exon.1;Parent=SECCE7Rv1G0472760.1	SECCE7Rv1G0472760.1	1060	present	Chromosome	lo7-cs_q30_rye_filter	SECCE7Rv1G0472760.1	Coverage	87.2428
chr7R	147581268	147581374	.	+	PGSB	exon	.	ID=SECCE7Rv1G0472770.1.exon.1;Parent=SECCE7Rv1G0472770.1	SECCE7Rv1G0472770.1	76	present	Chromosome	lo7-cs_q30_rye_filter	SECCE7Rv1G0472770.1	Coverage	15.3535
chr7R	147593411	147594182	.	-	PGSB	exon	.	ID=SECCE7Rv1G0472780.1.exon.1;Parent=SECCE7Rv1G0472780.1	SECCE7Rv1G0472780.1	363	present	Chromosome	lo7-cs_q30_rye_filter	SECCE7Rv1G0472780.1	Coverage	41.8685
chr7R	148181284	148181650	.	+	PGSB	exon	.	ID=SECCE7Rv1G0472790.1.exon.1;Parent=SECCE7Rv1G0472790.1	SECCE7Rv1G0472790.1	366	present	Chromosome	lo7-cs_q30_rye_filter	SECCE7Rv1G0472790.1	Coverage	100
chr7R	148237767	148238124	.	-	PGSB	exon	.	ID=SECCE7Rv1G0472800.1.exon.1;Parent=SECCE7Rv1G0472800.1	SECCE7Rv1G0472800.1	357	present	Chromosome	lo7-cs_q30_rye_filter	SECCE7Rv1G0472800.1	Coverage	100
chr7R	148947260	148947741	.	+	PGSB	exon	.	ID=SECCE7Rv1G0472810.1.exon.1;Parent=SECCE7Rv1G0472810.1	SECCE7Rv1G0472810.1	481	present	Chromosome	lo7-cs_q30_rye_filter	SECCE7Rv1G0472810.1	Coverage	100
chr7R	148964235	148964508	.	-	PGSB	exon	.	ID=SECCE7Rv1G0472820.1.exon.1;Parent=SECCE7Rv1G0472820.1	SECCE7Rv1G0472820.1	0	absent	Chromosome	lo7-cs_q30_rye_filter	SECCE7Rv1G0472820.1	Coverage	0
chr7R	149322468	149322496	.	-	PGSB	exon	.	ID=SECCE7Rv1G0472830.1.exon.1;Parent=SECCE7Rv1G0472830.1	SECCE7Rv1G0472830.1	28	present	Chromosome	lo7-cs_q30_rye_filter	SECCE7Rv1G0472830.1	Coverage	11.6667
chr7R	149326104	149326354	.	-	PGSB	exon	.	ID=SECCE7Rv1G0472840.1.exon.1;Parent=SECCE7Rv1G0472840.1	SECCE7Rv1G0472840.1	669	present	Chromosome	lo7-cs_q30_rye_filter	SECCE7Rv1G0472840.1	Coverage	100
chr7R	151185527	151185605	.	+	PGSB	exon	.	ID=SECCE7Rv1G0472850.1.exon.1;Parent=SECCE7Rv1G0472850.1	SECCE7Rv1G0472850.1	375	present	Chromosome	lo7-cs_q30_rye_filter	SECCE7Rv1G0472850.1	Coverage	100
chr7R	151407073	151407452	.	-	PGSB	exon	.	ID=SECCE7Rv1G0472860.1.exon.1;Parent=SECCE7Rv1G0472860.1	SECCE7Rv1G0472860.1	0	absent	Chromosome	lo7-cs_q30_rye_filter	SECCE7Rv1G0472860.1	Coverage	0
chr7R	151477200	151477410	.	-	PGSB	exon	.	ID=SECCE7Rv1G0472870.1.exon.1;Parent=SECCE7Rv1G0472870.1	SECCE7Rv1G0472870.1	0	absent	Chromosome	lo7-cs_q30_rye_filter	SECCE7Rv1G0472870.1	Coverage	0
chr7R	151477571	151478606	.	-	PGSB	exon	.	ID=SECCE7Rv1G0472880.1.exon.1;Parent=SECCE7Rv1G0472880.1	SECCE7Rv1G0472880.1	956	present	Chromosome	lo7-cs_q30_rye_filter	SECCE7Rv1G0472880.1	Coverage	92.3671
chr7R	151479152	151480286	.	-	PGSB	exon	.	ID=SECCE7Rv1G0472890.1.exon.1;Parent=SECCE7Rv1G0472890.1	SECCE7Rv1G0472890.1	0	absent	Chromosome	lo7-cs_q30_rye_filter	SECCE7Rv1G0472890.1	Coverage	0
chr7R	151633529	151634135	.	-	PGSB	exon	.	ID=SECCE7Rv1G0472900.1.exon.1;Parent=SECCE7Rv1G0472900.1	SECCE7Rv1G0472900.1	606	present	Chromosome	lo7-cs_q30_rye_filter	SECCE7Rv1G0472900.1	Coverage	100
chr7R	151649939	151650272	.	-	PGSB	exon	.	ID=SECCE7Rv1G0472910.1.exon.1;Parent=SECCE7Rv1G0472910.1	SECCE7Rv1G0472910.1	333	present	Chromosome	lo7-cs_q30_rye_filter	SECCE7Rv1G0472910.1	Coverage	100
chr7R	151798200	151800678	.	+	PGSB	exon	.	ID=SECCE7Rv1G0472920.1.exon.1;Parent=SECCE7Rv1G0472920.1	SECCE7Rv1G0472920.1	2478	present	Chromosome	lo7-cs_q30_rye_filter	SECCE7Rv1G0472920.1	Coverage	100
chr7R	151828891	151829131	.	-	PGSB	exon	.	ID=SECCE7Rv1G0472930.1.exon.1;Parent=SECCE7Rv1G0472930.1	SECCE7Rv1G0472930.1	3354	present	Chromosome	lo7-cs_q30_rye_filter	SECCE7Rv1G0472930.1	Coverage	100
chr7R	151906735	151908595	.	-	PGSB	exon	.	ID=SECCE7Rv1G0472940.1.exon.1;Parent=SECCE7Rv1G0472940.1	SECCE7Rv1G0472940.1	1926	present	Chromosome	lo7-cs_q30_rye_filter	SECCE7Rv1G0472940.1	Coverage	100
chr7R	151910397	151910617	.	+	PGSB	exon	.	ID=SECCE7Rv1G0472950.1.exon.1;Parent=SECCE7Rv1G0472950.1	SECCE7Rv1G0472950.1	417	present	Chromosome	lo7-cs_q30_rye_filter	SECCE7Rv1G0472950.1	Coverage	100
chr7R	152163138	152163230	.	+	PGSB	exon	.	ID=SECCE7Rv1G0472960.1.exon.1;Parent=SECCE7Rv1G0472960.1	SECCE7Rv1G0472960.1	292	present	Chromosome	lo7-cs_q30_rye_filter	SECCE7Rv1G0472960.1	Coverage	35.2657
chr7R	152277985	152279431	.	+	PGSB	exon	.	ID=SECCE7Rv1G0472970.1.exon.1;Parent=SECCE7Rv1G0472970.1	SECCE7Rv1G0472970.1	0	absent	Chromosome	lo7-cs_q30_rye_filter	SECCE7Rv1G0472970.1	Coverage	0
chr7R	152320268	152320550	.	+	PGSB	exon	.	ID=SECCE7Rv1G0472980.1.exon.1;Parent=SECCE7Rv1G0472980.1	SECCE7Rv1G0472980.1	1435	present	Chromosome	lo7-cs_q30_rye_filter	SECCE7Rv1G0472980.1	Coverage	88.9095
chr7R	152345562	152345694	.	+	PGSB	exon	.	ID=SECCE7Rv1G0472990.1.exon.1;Parent=SECCE7Rv1G0472990.1	SECCE7Rv1G0472990.1	385	present	Chromosome	lo7-cs_q30_rye_filter	SECCE7Rv1G0472990.1	Coverage	95.7711
chr7R	152356177	152357570	.	+	PGSB	exon	.	ID=SECCE7Rv1G0473000.1.exon.1;Parent=SECCE7Rv1G0473000.1	SECCE7Rv1G0473000.1	315	present	Chromosome	lo7-cs_q30_rye_filter	SECCE7Rv1G0473000.1	Coverage	15.5325
chr7R	152805382	152806966	.	-	PGSB	exon	.	ID=SECCE7Rv1G0473010.1.exon.1;Parent=SECCE7Rv1G0473010.1	SECCE7Rv1G0473010.1	894	present	Chromosome	lo7-cs_q30_rye_filter	SECCE7Rv1G0473010.1	Coverage	56.4394
chr7R	152813055	152814729	.	-	PGSB	exon	.	ID=SECCE7Rv1G0473020.1.exon.1;Parent=SECCE7Rv1G0473020.1	SECCE7Rv1G0473020.1	0	absent	Chromosome	lo7-cs_q30_rye_filter	SECCE7Rv1G0473020.1	Coverage	0
chr7R	152938071	152938614	.	-	PGSB	exon	.	ID=SECCE7Rv1G0473030.1.exon.1;Parent=SECCE7Rv1G0473030.1	SECCE7Rv1G0473030.1	524	present	Chromosome	lo7-cs_q30_rye_filter	SECCE7Rv1G0473030.1	Coverage	35.1442
chr7R	153103945	153104419	.	-	PGSB	exon	.	ID=SECCE7Rv1G0473040.1.exon.1;Parent=SECCE7Rv1G0473040.1	SECCE7Rv1G0473040.1	346	present	Chromosome	lo7-cs_q30_rye_filter	SECCE7Rv1G0473040.1	Coverage	32.4883
chr7R	153545621	153545946	.	-	PGSB	exon	.	ID=SECCE7Rv1G0473050.1.exon.1;Parent=SECCE7Rv1G0473050.1	SECCE7Rv1G0473050.1	0	absent	Chromosome	lo7-cs_q30_rye_filter	SECCE7Rv1G0473050.1	Coverage	0
chr7R	153582744	153583272	.	+	PGSB	exon	.	ID=SECCE7Rv1G0473060.1.exon.1;Parent=SECCE7Rv1G0473060.1	SECCE7Rv1G0473060.1	0	absent	Chromosome	lo7-cs_q30_rye_filter	SECCE7Rv1G0473060.1	Coverage	0
chr7R	153584411	153584852	.	+	PGSB	exon	.	ID=SECCE7Rv1G0473070.1.exon.1;Parent=SECCE7Rv1G0473070.1	SECCE7Rv1G0473070.1	0	absent	Chromosome	lo7-cs_q30_rye_filter	SECCE7Rv1G0473070.1	Coverage	0
chr7R	153862681	153862944	.	+	PGSB	exon	.	ID=SECCE7Rv1G0473080.1.exon.1;Parent=SECCE7Rv1G0473080.1	SECCE7Rv1G0473080.1	203	present	Chromosome	lo7-cs_q30_rye_filter	SECCE7Rv1G0473080.1	Coverage	77.1863
chr7R	153865072	153865099	.	+	PGSB	exon	.	ID=SECCE7Rv1G0473090.1.exon.1;Parent=SECCE7Rv1G0473090.1	SECCE7Rv1G0473090.1	596	present	Chromosome	lo7-cs_q30_rye_filter	SECCE7Rv1G0473090.1	Coverage	89.0882
chr7R	153866639	153866824	.	+	PGSB	exon	.	ID=SECCE7Rv1G0473100.1.exon.1;Parent=SECCE7Rv1G0473100.1	SECCE7Rv1G0473100.1	408	present	Chromosome	lo7-cs_q30_rye_filter	SECCE7Rv1G0473100.1	Coverage	65.7005
chr7R	153936343	153936432	.	+	PGSB	exon	.	ID=SECCE7Rv1G0473110.1.exon.1;Parent=SECCE7Rv1G0473110.1	SECCE7Rv1G0473110.1	0	absent	Chromosome	lo7-cs_q30_rye_filter	SECCE7Rv1G0473110.1	Coverage	0
chr7R	154006688	154008110	.	+	PGSB	exon	.	ID=SECCE7Rv1G0473120.1.exon.1;Parent=SECCE7Rv1G0473120.1	SECCE7Rv1G0473120.1	707	present	Chromosome	lo7-cs_q30_rye_filter	SECCE7Rv1G0473120.1	Coverage	49.7187
chr7R	154063744	154064029	.	+	PGSB	exon	.	ID=SECCE7Rv1G0473130.1.exon.1;Parent=SECCE7Rv1G0473130.1	SECCE7Rv1G0473130.1	0	absent	Chromosome	lo7-cs_q30_rye_filter	SECCE7Rv1G0473130.1	Coverage	0
chr7R	154095584	154096980	.	+	PGSB	exon	.	ID=SECCE7Rv1G0473140.1.exon.1;Parent=SECCE7Rv1G0473140.1	SECCE7Rv1G0473140.1	312	present	Chromosome	lo7-cs_q30_rye_filter	SECCE7Rv1G0473140.1	Coverage	15.3619
chr7R	154464586	154464598	.	-	PGSB	exon	.	ID=SECCE7Rv1G0473150.1.exon.1;Parent=SECCE7Rv1G0473150.1	SECCE7Rv1G0473150.1	0	absent	Chromosome	lo7-cs_q30_rye_filter	SECCE7Rv1G0473150.1	Coverage	0
chr7R	154467862	154468069	.	+	PGSB	exon	.	ID=SECCE7Rv1G0473160.1.exon.1;Parent=SECCE7Rv1G0473160.1	SECCE7Rv1G0473160.1	0	absent	Chromosome	lo7-cs_q30_rye_filter	SECCE7Rv1G0473160.1	Coverage	0
chr7R	154468312	154468549	.	-	PGSB	exon	.	ID=SECCE7Rv1G0473170.1.exon.1;Parent=SECCE7Rv1G0473170.1	SECCE7Rv1G0473170.1	0	absent	Chromosome	lo7-cs_q30_rye_filter	SECCE7Rv1G0473170.1	Coverage	0
chr7R	154618213	154619776	.	-	PGSB	exon	.	ID=SECCE7Rv1G0473180.1.exon.1;Parent=SECCE7Rv1G0473180.1	SECCE7Rv1G0473180.1	455	present	Chromosome	lo7-cs_q30_rye_filter	SECCE7Rv1G0473180.1	Coverage	29.1107
chr7R	154923484	154923958	.	-	PGSB	exon	.	ID=SECCE7Rv1G0473190.1.exon.1;Parent=SECCE7Rv1G0473190.1	SECCE7Rv1G0473190.1	563	present	Chromosome	lo7-cs_q30_rye_filter	SECCE7Rv1G0473190.1	Coverage	91.5447
chr7R	154932508	154932982	.	-	PGSB	exon	.	ID=SECCE7Rv1G0473200.1.exon.1;Parent=SECCE7Rv1G0473200.1	SECCE7Rv1G0473200.1	0	absent	Chromosome	lo7-cs_q30_rye_filter	SECCE7Rv1G0473200.1	Coverage	0
chr7R	154943361	154943448	.	-	PGSB	exon	.	ID=SECCE7Rv1G0473210.1.exon.1;Parent=SECCE7Rv1G0473210.1	SECCE7Rv1G0473210.1	2136	present	Chromosome	lo7-cs_q30_rye_filter	SECCE7Rv1G0473210.1	Coverage	100
chr7R	155325378	155325840	.	-	PGSB	exon	.	ID=SECCE7Rv1G0473220.1.exon.1;Parent=SECCE7Rv1G0473220.1	SECCE7Rv1G0473220.1	575	present	Chromosome	lo7-cs_q30_rye_filter	SECCE7Rv1G0473220.1	Coverage	99.3092
chr7R	155343855	155344102	.	+	PGSB	exon	.	ID=SECCE7Rv1G0473230.1.exon.1;Parent=SECCE7Rv1G0473230.1	SECCE7Rv1G0473230.1	1149	present	Chromosome	lo7-cs_q30_rye_filter	SECCE7Rv1G0473230.1	Coverage	73.6538
chr7R	155348437	155348896	.	-	PGSB	exon	.	ID=SECCE7Rv1G0473240.1.exon.1;Parent=SECCE7Rv1G0473240.1	SECCE7Rv1G0473240.1	459	present	Chromosome	lo7-cs_q30_rye_filter	SECCE7Rv1G0473240.1	Coverage	100
chr7R	155491839	155492004	.	+	PGSB	exon	.	ID=SECCE7Rv1G0473250.1.exon.1;Parent=SECCE7Rv1G0473250.1	SECCE7Rv1G0473250.1	1233	present	Chromosome	lo7-cs_q30_rye_filter	SECCE7Rv1G0473250.1	Coverage	28.0738
chr7R	155543784	155543985	.	-	PGSB	exon	.	ID=SECCE7Rv1G0473260.1.exon.1;Parent=SECCE7Rv1G0473260.1	SECCE7Rv1G0473260.1	1455	present	Chromosome	lo7-cs_q30_rye_filter	SECCE7Rv1G0473260.1	Coverage	78.3522
chr7R	155569194	155569257	.	+	PGSB	exon	.	ID=SECCE7Rv1G0473270.1.exon.1;Parent=SECCE7Rv1G0473270.1	SECCE7Rv1G0473270.1	251	present	Chromosome	lo7-cs_q30_rye_filter	SECCE7Rv1G0473270.1	Coverage	25.903
chr7R	155944396	155944708	.	-	PGSB	exon	.	ID=SECCE7Rv1G0473280.1.exon.1;Parent=SECCE7Rv1G0473280.1	SECCE7Rv1G0473280.1	0	absent	Chromosome	lo7-cs_q30_rye_filter	SECCE7Rv1G0473280.1	Coverage	0
chr7R	155963940	155964067	.	+	PGSB	exon	.	ID=SECCE7Rv1G0473290.1.exon.1;Parent=SECCE7Rv1G0473290.1	SECCE7Rv1G0473290.1	127	present	Chromosome	lo7-cs_q30_rye_filter	SECCE7Rv1G0473290.1	Coverage	6.19815
chr7R	155970316	155970713	.	-	PGSB	exon	.	ID=SECCE7Rv1G0473300.1.exon.1;Parent=SECCE7Rv1G0473300.1	SECCE7Rv1G0473300.1	139	present	Chromosome	lo7-cs_q30_rye_filter	SECCE7Rv1G0473300.1	Coverage	9.61272
chr7R	156020407	156020752	.	-	PGSB	exon	.	ID=SECCE7Rv1G0473310.1.exon.1;Parent=SECCE7Rv1G0473310.1	SECCE7Rv1G0473310.1	1261	present	Chromosome	lo7-cs_q30_rye_filter	SECCE7Rv1G0473310.1	Coverage	48.2587
chr7R	156421998	156422340	.	+	PGSB	exon	.	ID=SECCE7Rv1G0473320.1.exon.1;Parent=SECCE7Rv1G0473320.1	SECCE7Rv1G0473320.1	0	absent	Chromosome	lo7-cs_q30_rye_filter	SECCE7Rv1G0473320.1	Coverage	0
chr7R	156465546	156465831	.	+	PGSB	exon	.	ID=SECCE7Rv1G0473330.1.exon.1;Parent=SECCE7Rv1G0473330.1	SECCE7Rv1G0473330.1	234	present	Chromosome	lo7-cs_q30_rye_filter	SECCE7Rv1G0473330.1	Coverage	20.4188
chr7R	156843214	156843270	.	-	PGSB	exon	.	ID=SECCE7Rv1G0473340.1.exon.1;Parent=SECCE7Rv1G0473340.1	SECCE7Rv1G0473340.1	428	present	Chromosome	lo7-cs_q30_rye_filter	SECCE7Rv1G0473340.1	Coverage	56.6138
chr7R	156850213	156851215	.	-	PGSB	exon	.	ID=SECCE7Rv1G0473350.1.exon.1;Parent=SECCE7Rv1G0473350.1	SECCE7Rv1G0473350.1	1002	present	Chromosome	lo7-cs_q30_rye_filter	SECCE7Rv1G0473350.1	Coverage	100
chr7R	156864150	156864432	.	-	PGSB	exon	.	ID=SECCE7Rv1G0473360.1.exon.1;Parent=SECCE7Rv1G0473360.1	SECCE7Rv1G0473360.1	282	present	Chromosome	lo7-cs_q30_rye_filter	SECCE7Rv1G0473360.1	Coverage	100
chr7R	156983585	156983891	.	-	PGSB	exon	.	ID=SECCE7Rv1G0473370.1.exon.1;Parent=SECCE7Rv1G0473370.1	SECCE7Rv1G0473370.1	306	present	Chromosome	lo7-cs_q30_rye_filter	SECCE7Rv1G0473370.1	Coverage	100
chr7R	156984185	156985838	.	-	PGSB	exon	.	ID=SECCE7Rv1G0473380.1.exon.1;Parent=SECCE7Rv1G0473380.1	SECCE7Rv1G0473380.1	1375	present	Chromosome	lo7-cs_q30_rye_filter	SECCE7Rv1G0473380.1	Coverage	83.1821
chr7R	157024319	157024352	.	-	PGSB	exon	.	ID=SECCE7Rv1G0473390.1.exon.1;Parent=SECCE7Rv1G0473390.1	SECCE7Rv1G0473390.1	1008	present	Chromosome	lo7-cs_q30_rye_filter	SECCE7Rv1G0473390.1	Coverage	100
chr7R	157379566	157379725	.	-	PGSB	exon	.	ID=SECCE7Rv1G0473400.1.exon.1;Parent=SECCE7Rv1G0473400.1	SECCE7Rv1G0473400.1	264	present	Chromosome	lo7-cs_q30_rye_filter	SECCE7Rv1G0473400.1	Coverage	100
chr7R	157481739	157482099	.	-	PGSB	exon	.	ID=SECCE7Rv1G0473410.1.exon.1;Parent=SECCE7Rv1G0473410.1	SECCE7Rv1G0473410.1	360	present	Chromosome	lo7-cs_q30_rye_filter	SECCE7Rv1G0473410.1	Coverage	100
chr7R	157486930	157487127	.	-	PGSB	exon	.	ID=SECCE7Rv1G0473420.1.exon.1;Parent=SECCE7Rv1G0473420.1	SECCE7Rv1G0473420.1	670	present	Chromosome	lo7-cs_q30_rye_filter	SECCE7Rv1G0473420.1	Coverage	66.4683
chr7R	157668634	157668810	.	+	PGSB	exon	.	ID=SECCE7Rv1G0473430.1.exon.1;Parent=SECCE7Rv1G0473430.1	SECCE7Rv1G0473430.1	3198	present	Chromosome	lo7-cs_q30_rye_filter	SECCE7Rv1G0473430.1	Coverage	82.3166
chr7R	157676155	157676371	.	+	PGSB	exon	.	ID=SECCE7Rv1G0473440.1.exon.1;Parent=SECCE7Rv1G0473440.1	SECCE7Rv1G0473440.1	2070	present	Chromosome	lo7-cs_q30_rye_filter	SECCE7Rv1G0473440.1	Coverage	100
chr7R	157684403	157685166	.	+	PGSB	exon	.	ID=SECCE7Rv1G0473450.1.exon.1;Parent=SECCE7Rv1G0473450.1	SECCE7Rv1G0473450.1	2022	present	Chromosome	lo7-cs_q30_rye_filter	SECCE7Rv1G0473450.1	Coverage	94.3978
chr7R	157698350	157698494	.	+	PGSB	exon	.	ID=SECCE7Rv1G0473460.1.exon.1;Parent=SECCE7Rv1G0473460.1	SECCE7Rv1G0473460.1	0	absent	Chromosome	lo7-cs_q30_rye_filter	SECCE7Rv1G0473460.1	Coverage	0
chr7R	157730776	157731028	.	-	PGSB	exon	.	ID=SECCE7Rv1G0473470.1.exon.1;Parent=SECCE7Rv1G0473470.1	SECCE7Rv1G0473470.1	0	absent	Chromosome	lo7-cs_q30_rye_filter	SECCE7Rv1G0473470.1	Coverage	0
chr7R	157732449	157732761	.	-	PGSB	exon	.	ID=SECCE7Rv1G0473480.1.exon.1;Parent=SECCE7Rv1G0473480.1	SECCE7Rv1G0473480.1	0	absent	Chromosome	lo7-cs_q30_rye_filter	SECCE7Rv1G0473480.1	Coverage	0
chr7R	158245669	158247130	.	-	PGSB	exon	.	ID=SECCE7Rv1G0473490.1.exon.1;Parent=SECCE7Rv1G0473490.1	SECCE7Rv1G0473490.1	0	absent	Chromosome	lo7-cs_q30_rye_filter	SECCE7Rv1G0473490.1	Coverage	0
chr7R	158494403	158495683	.	-	PGSB	exon	.	ID=SECCE7Rv1G0473500.1.exon.1;Parent=SECCE7Rv1G0473500.1	SECCE7Rv1G0473500.1	0	absent	Chromosome	lo7-cs_q30_rye_filter	SECCE7Rv1G0473500.1	Coverage	0
chr7R	158505761	158506277	.	-	PGSB	exon	.	ID=SECCE7Rv1G0473510.1.exon.1;Parent=SECCE7Rv1G0473510.1	SECCE7Rv1G0473510.1	0	absent	Chromosome	lo7-cs_q30_rye_filter	SECCE7Rv1G0473510.1	Coverage	0
chr7R	158512009	158512555	.	-	PGSB	exon	.	ID=SECCE7Rv1G0473520.1.exon.1;Parent=SECCE7Rv1G0473520.1	SECCE7Rv1G0473520.1	0	absent	Chromosome	lo7-cs_q30_rye_filter	SECCE7Rv1G0473520.1	Coverage	0
chr7R	158683627	158683642	.	+	PGSB	exon	.	ID=SECCE7Rv1G0473530.1.exon.1;Parent=SECCE7Rv1G0473530.1	SECCE7Rv1G0473530.1	108	present	Chromosome	lo7-cs_q30_rye_filter	SECCE7Rv1G0473530.1	Coverage	10.5572
chr7R	158889431	158889629	.	-	PGSB	exon	.	ID=SECCE7Rv1G0473540.1.exon.1;Parent=SECCE7Rv1G0473540.1	SECCE7Rv1G0473540.1	0	absent	Chromosome	lo7-cs_q30_rye_filter	SECCE7Rv1G0473540.1	Coverage	0
chr7R	159209163	159209829	.	+	PGSB	exon	.	ID=SECCE7Rv1G0473550.1.exon.1;Parent=SECCE7Rv1G0473550.1	SECCE7Rv1G0473550.1	0	absent	Chromosome	lo7-cs_q30_rye_filter	SECCE7Rv1G0473550.1	Coverage	0
chr7R	159227709	159228858	.	-	PGSB	exon	.	ID=SECCE7Rv1G0473560.1.exon.1;Parent=SECCE7Rv1G0473560.1	SECCE7Rv1G0473560.1	389	present	Chromosome	lo7-cs_q30_rye_filter	SECCE7Rv1G0473560.1	Coverage	33.8555
chr7R	159243242	159243383	.	-	PGSB	exon	.	ID=SECCE7Rv1G0473570.1.exon.1;Parent=SECCE7Rv1G0473570.1	SECCE7Rv1G0473570.1	0	absent	Chromosome	lo7-cs_q30_rye_filter	SECCE7Rv1G0473570.1	Coverage	0
chr7R	159482806	159483292	.	-	PGSB	exon	.	ID=SECCE7Rv1G0473580.1.exon.1;Parent=SECCE7Rv1G0473580.1	SECCE7Rv1G0473580.1	1319	present	Chromosome	lo7-cs_q30_rye_filter	SECCE7Rv1G0473580.1	Coverage	71.9585
chr7R	159488032	159488338	.	+	PGSB	exon	.	ID=SECCE7Rv1G0473590.1.exon.1;Parent=SECCE7Rv1G0473590.1	SECCE7Rv1G0473590.1	0	absent	Chromosome	lo7-cs_q30_rye_filter	SECCE7Rv1G0473590.1	Coverage	0
chr7R	159491298	159491640	.	+	PGSB	exon	.	ID=SECCE7Rv1G0473600.1.exon.1;Parent=SECCE7Rv1G0473600.1	SECCE7Rv1G0473600.1	0	absent	Chromosome	lo7-cs_q30_rye_filter	SECCE7Rv1G0473600.1	Coverage	0
chr7R	159491724	159491958	.	+	PGSB	exon	.	ID=SECCE7Rv1G0473610.1.exon.1;Parent=SECCE7Rv1G0473610.1	SECCE7Rv1G0473610.1	0	absent	Chromosome	lo7-cs_q30_rye_filter	SECCE7Rv1G0473610.1	Coverage	0
chr7R	159495369	159495527	.	-	PGSB	exon	.	ID=SECCE7Rv1G0473620.1.exon.1;Parent=SECCE7Rv1G0473620.1	SECCE7Rv1G0473620.1	1863	present	Chromosome	lo7-cs_q30_rye_filter	SECCE7Rv1G0473620.1	Coverage	100
chr7R	159504739	159506644	.	+	PGSB	exon	.	ID=SECCE7Rv1G0473630.1.exon.1;Parent=SECCE7Rv1G0473630.1	SECCE7Rv1G0473630.1	548	present	Chromosome	lo7-cs_q30_rye_filter	SECCE7Rv1G0473630.1	Coverage	28.7664
chr7R	159625000	159625192	.	+	PGSB	exon	.	ID=SECCE7Rv1G0473640.1.exon.1;Parent=SECCE7Rv1G0473640.1	SECCE7Rv1G0473640.1	0	absent	Chromosome	lo7-cs_q30_rye_filter	SECCE7Rv1G0473640.1	Coverage	0
chr7R	159753514	159753554	.	+	PGSB	exon	.	ID=SECCE7Rv1G0473650.1.exon.1;Parent=SECCE7Rv1G0473650.1	SECCE7Rv1G0473650.1	0	absent	Chromosome	lo7-cs_q30_rye_filter	SECCE7Rv1G0473650.1	Coverage	0
chr7R	159755066	159756107	.	-	PGSB	exon	.	ID=SECCE7Rv1G0473660.1.exon.1;Parent=SECCE7Rv1G0473660.1	SECCE7Rv1G0473660.1	0	absent	Chromosome	lo7-cs_q30_rye_filter	SECCE7Rv1G0473660.1	Coverage	0
chr7R	159761416	159761456	.	+	PGSB	exon	.	ID=SECCE7Rv1G0473670.1.exon.1;Parent=SECCE7Rv1G0473670.1	SECCE7Rv1G0473670.1	0	absent	Chromosome	lo7-cs_q30_rye_filter	SECCE7Rv1G0473670.1	Coverage	0
chr7R	159763162	159763504	.	+	PGSB	exon	.	ID=SECCE7Rv1G0473680.1.exon.1;Parent=SECCE7Rv1G0473680.1	SECCE7Rv1G0473680.1	0	absent	Chromosome	lo7-cs_q30_rye_filter	SECCE7Rv1G0473680.1	Coverage	0
chr7R	159770139	159771180	.	-	PGSB	exon	.	ID=SECCE7Rv1G0473690.1.exon.1;Parent=SECCE7Rv1G0473690.1	SECCE7Rv1G0473690.1	0	absent	Chromosome	lo7-cs_q30_rye_filter	SECCE7Rv1G0473690.1	Coverage	0
chr7R	159857764	159857837	.	+	PGSB	exon	.	ID=SECCE7Rv1G0473700.1.exon.1;Parent=SECCE7Rv1G0473700.1	SECCE7Rv1G0473700.1	2510	present	Chromosome	lo7-cs_q30_rye_filter	SECCE7Rv1G0473700.1	Coverage	92.6541
chr7R	159896997	159897251	.	+	PGSB	exon	.	ID=SECCE7Rv1G0473710.1.exon.1;Parent=SECCE7Rv1G0473710.1	SECCE7Rv1G0473710.1	1230	present	Chromosome	lo7-cs_q30_rye_filter	SECCE7Rv1G0473710.1	Coverage	100
chr7R	159900441	159900809	.	+	PGSB	exon	.	ID=SECCE7Rv1G0473720.1.exon.1;Parent=SECCE7Rv1G0473720.1	SECCE7Rv1G0473720.1	27	absent	Chromosome	lo7-cs_q30_rye_filter	SECCE7Rv1G0473720.1	Coverage	3.34572
chr7R	159995579	159996959	.	-	PGSB	exon	.	ID=SECCE7Rv1G0473730.1.exon.1;Parent=SECCE7Rv1G0473730.1	SECCE7Rv1G0473730.1	0	absent	Chromosome	lo7-cs_q30_rye_filter	SECCE7Rv1G0473730.1	Coverage	0
chr7R	160424502	160424721	.	-	PGSB	exon	.	ID=SECCE7Rv1G0473740.1.exon.1;Parent=SECCE7Rv1G0473740.1	SECCE7Rv1G0473740.1	3	absent	Chromosome	lo7-cs_q30_rye_filter	SECCE7Rv1G0473740.1	Coverage	0.325733
chr7R	160503781	160503961	.	-	PGSB	exon	.	ID=SECCE7Rv1G0473750.1.exon.1;Parent=SECCE7Rv1G0473750.1	SECCE7Rv1G0473750.1	117	present	Chromosome	lo7-cs_q30_rye_filter	SECCE7Rv1G0473750.1	Coverage	39
chr7R	160597652	160598284	.	-	PGSB	exon	.	ID=SECCE7Rv1G0473760.1.exon.1;Parent=SECCE7Rv1G0473760.1	SECCE7Rv1G0473760.1	1843	present	Chromosome	lo7-cs_q30_rye_filter	SECCE7Rv1G0473760.1	Coverage	97.8238
chr7R	161006259	161006475	.	+	PGSB	exon	.	ID=SECCE7Rv1G0473770.1.exon.1;Parent=SECCE7Rv1G0473770.1	SECCE7Rv1G0473770.1	216	present	Chromosome	lo7-cs_q30_rye_filter	SECCE7Rv1G0473770.1	Coverage	100
chr7R	161348209	161349712	.	+	PGSB	exon	.	ID=SECCE7Rv1G0473780.1.exon.1;Parent=SECCE7Rv1G0473780.1	SECCE7Rv1G0473780.1	1503	present	Chromosome	lo7-cs_q30_rye_filter	SECCE7Rv1G0473780.1	Coverage	100
chr7R	161356046	161356218	.	+	PGSB	exon	.	ID=SECCE7Rv1G0473790.1.exon.1;Parent=SECCE7Rv1G0473790.1	SECCE7Rv1G0473790.1	933	present	Chromosome	lo7-cs_q30_rye_filter	SECCE7Rv1G0473790.1	Coverage	100
chr7R	161373434	161373824	.	+	PGSB	exon	.	ID=SECCE7Rv1G0473800.1.exon.1;Parent=SECCE7Rv1G0473800.1	SECCE7Rv1G0473800.1	612	present	Chromosome	lo7-cs_q30_rye_filter	SECCE7Rv1G0473800.1	Coverage	100
chr7R	161663745	161664003	.	+	PGSB	exon	.	ID=SECCE7Rv1G0473810.1.exon.1;Parent=SECCE7Rv1G0473810.1	SECCE7Rv1G0473810.1	1599	present	Chromosome	lo7-cs_q30_rye_filter	SECCE7Rv1G0473810.1	Coverage	100
chr7R	161685382	161685497	.	-	PGSB	exon	.	ID=SECCE7Rv1G0473820.1.exon.1;Parent=SECCE7Rv1G0473820.1	SECCE7Rv1G0473820.1	1200	present	Chromosome	lo7-cs_q30_rye_filter	SECCE7Rv1G0473820.1	Coverage	100
[truncated: 12,070 more rows]
