# Supplementary material for: Isolation and Sequencing of Chromosome Arm 7RS of Rye, Secale cereale
Source: Int J Mol Sci. 2022 Sep 21;23(19):11106. doi: 10.3390/ijms231911106 (PMC9569962; doi:10.3390/ijms231911106)
Supplement: Supplementary file 1 [file ijms-23-11106-s001.zip › Table_S2 Lo7 unplaced genes present on 7RS.xlsx]

## Sheet: Sheet1
Table S2:Genes of Lo7 reference annotation in unplaced contigs, which were identified as present in the 7RS chromosome arm sequencing using a stringent PAV cut off (minimum per-base sequencing depth 50x, horizontal coverage of 95% )
Gene
SECCEUnv1G0527300.1
SECCEUnv1G0527330.1
SECCEUnv1G0527380.1
SECCEUnv1G0527400.1
SECCEUnv1G0527450.1
SECCEUnv1G0527540.1
SECCEUnv1G0527630.1
SECCEUnv1G0529600.1
SECCEUnv1G0529740.1
SECCEUnv1G0529860.1
SECCEUnv1G0529880.1
SECCEUnv1G0529910.1
SECCEUnv1G0529920.1
SECCEUnv1G0529930.1
SECCEUnv1G0531060.1
SECCEUnv1G0541300.1
SECCEUnv1G0543330.1
SECCEUnv1G0543350.1
SECCEUnv1G0544530.1
SECCEUnv1G0545190.1
SECCEUnv1G0550930.1
SECCEUnv1G0555040.1
SECCEUnv1G0561470.1
SECCEUnv1G0567070.1
SECCEUnv1G0569520.1
SECCEUnv1G0570350.1
SECCEUnv1G0570670.1
SECCEUnv1G0571420.1
SECCEUnv1G0571430.1
