# Supplementary material for: Isolation and Sequencing of Chromosome Arm 7RS of Rye, Secale cereale
Source: Int J Mol Sci. 2022 Sep 21;23(19):11106. doi: 10.3390/ijms231911106 (PMC9569962; doi:10.3390/ijms231911106)
Supplement: Supplementary file 1 [file ijms-23-11106-s001.zip › Table_S3 genes in missing clusters.xlsx]

## Sheet: Table S3 genes in missing clust
A) Cluster 1 summary statistics of lo7 reference annotation genes, missing on the isolated chromosome arm 7RS. LC=low confidence in reference annotation, HC=high confidence in reference annotation
cluster	chromosome	start	end	gene	Gene length	Number of exons	Median cds base coverage	horizontal coverage (2x+)[%]	LO7-annotaion-confidence	domain_accession	short_name
1	7R	197001808	197002327	SECCE7Rv1G0476080.1	519	1	0	0	LC	NA	NA
1	7R	197172028	197172220	SECCE7Rv1G0476090.1	192	1	0	0	LC	NA	NA
1	7R	197172232	197172378	SECCE7Rv1G0476100.1	551	2	0	0	LC	cl24049	NAM-associated superfamily
1	7R	197174408	197174882	SECCE7Rv1G0476110.1	1110	2	0	0	HC	pfam07893	DUF1668
1	7R	197561365	197561740	SECCE7Rv1G0476120.1	375	1	0	0	HC	NA	NA
1	7R	197902680	197903653	SECCE7Rv1G0476130.1	1536	7	0	0	LC	NA	NA
1	7R	198125670	198126643	SECCE7Rv1G0476140.1	1011	2	0	0	LC	NA	NA
B) Cluster 2 summary statistics of lo7 reference annotation genes, missing on the isolated chromosome arm 7RS. LC=low confidence in reference annotation, HC=high confidence in reference annotation
cluster	chromosome	start	end	gene	Gene length	Number of exons	Median cds base coverage	horizontal coverage (2x+)[%]	LO7-annotaion-confidence	domain_accession	short_name
2	7R	258401889	258402559	SECCE7Rv1G0479770.1	933	3	0	0	LC	cl33633	PLN03091 superfamily
2	7R	258888244	258888598	SECCE7Rv1G0479780.1	354	1	0	0	LC	NA	NA
2	7R	259076893	259077733	SECCE7Rv1G0479790.1	840	1	0	0	LC	pfam13837	Myb_DNA-bind_4
2	7R	259184985	259185184	SECCE7Rv1G0479800.1	2610	2	0	0	HC	cl27231	KAP95 superfamily
2	7R	259417397	259418863	SECCE7Rv1G0479810.1	2301	4	0	0	LC	cl38908	BTB_POZ superfamily
2	7R	259417397	259418863	SECCE7Rv1G0479810.1	2301	4	0	0	LC	cl37187	PEP_TPR_lipo superfamily
2	7R	259424376	259424975	SECCE7Rv1G0479820.1	1500	6	0	0	HC	cl21453	PKc_like superfamily
2	7R	259883336	259883948	SECCE7Rv1G0479830.1	612	1	0	0	LC	cl36897	Ube1 superfamily
2	7R	259898076	259898460	SECCE7Rv1G0479840.1	384	1	0	0	LC	NA	NA
2	7R	260042776	260043517	SECCE7Rv1G0479850.1	741	1	0	0	HC	NA	NA
2	7R	260051784	260051855	SECCE7Rv1G0479860.1	516	2	0	0	LC	cd18809	SF1_C_RecD
2	7R	260051784	260051855	SECCE7Rv1G0479860.1	516	2	0	0	LC	cl33920	RecD superfamily
2	7R	260051784	260051855	SECCE7Rv1G0479860.1	516	2	0	0	LC	cl28899	DEAD-like_helicase_N superfamily
2	7R	260242736	260243020	SECCE7Rv1G0479870.1	284	1	0	0	LC	NA	NA
2	7R	260254082	260254257	SECCE7Rv1G0479880.1	175	1	0	0	LC	cl21453	PKc_like superfamily
2	7R	260406843	260407995	SECCE7Rv1G0479890.1	1152	1	0	0	HC	pfam12937	F-box-like
2	7R	260571078	260571300	SECCE7Rv1G0479900.1	222	1	0	0	LC	NA	NA
2	7R	260578085	260578361	SECCE7Rv1G0479910.1	276	1	0	0	LC	NA	NA
2	7R	261137320	261137644	SECCE7Rv1G0479920.1	324	1	0	0	LC	cl38513	PPR_long superfamily
2	7R	261522419	261522725	SECCE7Rv1G0479950.1	306	1	0	0	LC	cl02808	RT_like superfamily
2	7R	262111540	262111678	SECCE7Rv1G0479960.1	1113	2	0	0	LC	cl41757	cytochrome_P450 superfamily
2	7R	263366118	263367450	SECCE7Rv1G0479980.1	1332	1	0	0	LC	pfam04827	Plant_tran
2	7R	263367683	263367959	SECCE7Rv1G0479990.1	345	2	0	0	LC	NA	NA
2	7R	263425478	263425586	SECCE7Rv1G0480000.1	333	2	0	0	HC	pfam03134	TB2_DP1_HVA22
2	7R	264311709	264312093	SECCE7Rv1G0480010.1	384	1	0	0	LC	cl24049	NAM-associated superfamily
2	7R	264312351	264313393	SECCE7Rv1G0480020.1	1257	2	0	0	LC	pfam04827	Plant_tran
2	7R	264428937	264429522	SECCE7Rv1G0480030.1	585	1	0	0	LC	NA	NA
2	7R	264434634	264435108	SECCE7Rv1G0480040.1	474	1	0	0	LC	cl09347	DNA_pol_phi superfamily
2	7R	265031703	265032141	SECCE7Rv1G0480050.1	438	1	0	0	LC	cd09272	RNase_HI_RT_Ty1
2	7R	265041262	265041412	SECCE7Rv1G0480060.1	969	4	0	0.412797	HC	cl26744	TPT superfamily
2	7R	265605325	265605341	SECCE7Rv1G0480110.1	516	8	0	0	LC	cl00196	plant_peroxidase_like superfamily
2	7R	265625516	265625781	SECCE7Rv1G0480130.1	265	1	0	0	LC	NA	NA
2	7R	266224298	266224975	SECCE7Rv1G0480140.1	677	1	0	0	LC	NA	NA
2	7R	266584563	266585274	SECCE7Rv1G0480150.1	711	1	0	2.25035	LC	cl35261	PRK04342 superfamily
2	7R	266620624	266620835	SECCE7Rv1G0480170.1	1146	11	0	0	HC	cl28371	CECR5 superfamily
2	7R	266756060	266756729	SECCE7Rv1G0480180.1	669	1	0	0	HC	cd05797	Ribosomal_L10
2	7R	266882385	266882574	SECCE7Rv1G0480200.1	1020	4	0	0	HC	cd14066	STKc_IRAK
2	7R	266885671	266885707	SECCE7Rv1G0480210.1	498	6	0	1.60643	HC	NA	NA
2	7R	266893635	266893969	SECCE7Rv1G0480240.1	334	1	0	0	LC	NA	NA
2	7R	267180051	267181296	SECCE7Rv1G0480250.1	1245	1	0	0	HC	cd16461	RING-H2_EL5_like
2	7R	267180051	267181296	SECCE7Rv1G0480250.1	1245	1	0	0	HC	cl34953	HRD1 superfamily
2	7R	267298615	267298879	SECCE7Rv1G0480260.1	264	1	0	0	HC	NA	NA
2	7R	267307275	267307419	SECCE7Rv1G0480270.1	999	6	0	0	HC	pfam00576	Transthyretin
2	7R	267307275	267307419	SECCE7Rv1G0480270.1	999	6	0	0	HC	pfam09349	OHCU_decarbox
2	7R	267491174	267491334	SECCE7Rv1G0480280.1	687	7	0	0	LC	cl00453	CDP-OH_P_transf superfamily
2	7R	267849382	267850171	SECCE7Rv1G0480290.1	789	1	0	0	LC	cl33629	PLN03077 superfamily
2	7R	268242905	268243262	SECCE7Rv1G0480310.1	480	3	0	0	HC	smart00671	SEL1
2	7R	268694187	268694379	SECCE7Rv1G0480330.1	633	3	0	0	HC	pfam04535	DUF588
2	7R	268702895	268703240	SECCE7Rv1G0480340.1	345	1	0	0	LC	NA	NA
2	7R	268914292	268914805	SECCE7Rv1G0480350.1	513	1	0	0	HC	pfam14009	DUF4228
2	7R	269058338	269059489	SECCE7Rv1G0480360.1	1797	4	0	0	HC	cl37260	laccase superfamily
2	7R	269064648	269065322	SECCE7Rv1G0480370.1	2469	2	0	0	HC	cd14066	STKc_IRAK
2	7R	269064648	269065322	SECCE7Rv1G0480370.1	2469	2	0	0	HC	cl33413	PLN00113 superfamily
2	7R	269064648	269065322	SECCE7Rv1G0480370.1	2469	2	0	0	HC	pfam08263	LRRNT_2
2	7R	270158044	270159736	SECCE7Rv1G0480400.1	1692	1	0	0	HC	cl33436	PLN02217 superfamily
2	7R	270169043	270169268	SECCE7Rv1G0480410.1	225	1	0	0	LC	NA	NA
2	7R	270169995	270170295	SECCE7Rv1G0480420.1	300	1	0	0	LC	NA	NA
2	7R	270171932	270172196	SECCE7Rv1G0480430.1	279	2	0	0	LC	cl39183	PMD superfamily
2	7R	270468776	270469010	SECCE7Rv1G0480440.1	795	2	0	0	LC	pfam04116	FA_hydroxylase
2	7R	270474557	270474671	SECCE7Rv1G0480450.1	684	5	0	0	HC	pfam03227	GILT
2	7R	270570201	270571479	SECCE7Rv1G0480460.1	1278	1	0	0	HC	cd16461	RING-H2_EL5_like
2	7R	270682799	270683006	SECCE7Rv1G0480470.1	777	5	0	0	HC	pfam03227	GILT
2	7R	270686599	270686791	SECCE7Rv1G0480480.1	747	5	0	0	HC	pfam03227	GILT
2	7R	270690036	270690231	SECCE7Rv1G0480490.1	765	5	0	0	HC	pfam03227	GILT
2	7R	271050221	271050275	SECCE7Rv1G0480500.1	303	4	0	0	LC	cl17238	RING_Ubox superfamily
2	7R	271051764	271051787	SECCE7Rv1G0480510.1	399	3	0	0	HC	NA	NA
2	7R	271166617	271166969	SECCE7Rv1G0480520.1	663	3	0	0	LC	NA	NA
2	7R	271168127	271168213	SECCE7Rv1G0480530.1	516	4	0	0	LC	pfam02466	Tim17
2	7R	271171562	271172078	SECCE7Rv1G0480540.1	960	5	0	0	HC	cl36533	PTZ00248 superfamily
2	7R	271458973	271459043	SECCE7Rv1G0480550.1	450	5	0	0	HC	pfam00235	Profilin
2	7R	271508735	271509097	SECCE7Rv1G0480560.1	1461	2	0	0	HC	cl23725	Glyco_hydro superfamily
2	7R	271508735	271509097	SECCE7Rv1G0480560.1	1461	2	0	0	HC	smart00768	X8
2	7R	271511987	271512497	SECCE7Rv1G0480570.1	510	1	0	0	HC	pfam05617	Prolamin_like
